# Supplementary material for: Panoramic transcriptome analysis and functional screening of long noncoding RNAs in mouse spermatogenesis
Source: HighWire-hosted journal article supplement (doi:10.1101/gr.264333.120), 2020-12-16
Supplement: Supplemental_Table_S1.xlsx.xlsx [file Supplemental_Table_S1.xlsx.xlsx]

## Sheet: RNA-seq
Table S1. Quality control of sequencing data
Sample type	Sample	Raw Reads	Raw Base(G)	Clean Reads	Clean Base (G)	Mapped Reads	Mapped / Raw	Mapped / Clean
priSG-A	priSG-A-s1	160315164	24.05	154022110	23.1033	80726058	50.3546	52.412
	priSG-A-s2	226896756	34.03	212919082	31.9379	149637724	65.9497	70.2792
	priSG-A-s3	156573940	23.49	147489568	22.1234	109945436	70.2195	74.5446
SG-B	SG-B-s3-4-1	168306038	25.25	147209010	22.0814	140680320	83.586	95.565
	SG-B-s3-4-2	213832820	32.07	189195382	28.3793	177905052	83.1982	94.0324
	SG-B-s3-4-3	191751168	28.76	162614092	24.3921	144602844	75.4117	88.9239
plpSC	plpSC-s1	154790528	23.22	147196122	22.0794	86269776	55.7332	58.6087
	plpSC-s2	158217428	23.73	145403604	21.8105	111523000	70.4872	76.6989
	plpSC-s3	154527314	23.18	147743396	22.1615	103240828	66.8107	69.8785
pacSC	pacSC-s1-2-1_FRRL19H000548-1a	138922588	20.84	128560246	19.284	125677732	90.466	97.7578
	pacSC-s1-2-2_FRRL19H000550-1a	154680994	23.2	143428098	21.5142	139668786	90.2947	97.379
	pacSC-s1-2-3_FRRL19H000552-1a	148266424	22.24	136254992	20.4382	129995676	87.6771	95.4062
rST	rST-s1	146301314	21.95	142044272	21.3066	100138300	68.4466	70.498
	rST-s2	137865690	20.68	128110542	19.2166	93763516	68.0108	73.1895
	rST-s3	171041506	25.66	161739820	24.261	114678858	67.0474	70.9033
elST	elST-s1	145085538	21.76	140303392	21.0455	85689052	59.0611	61.0741
	elST-s2	136583956	20.49	124568768	18.6853	96185814	70.4225	77.215
	elST-s3	140889124	21.13	133795684	20.0694	101914918	72.337	76.1721

## Sheet: Single-cell RNA-seq
Cell Type	Number of Reads	Valid Barcodes	Q30 Bases in Barcode	Q30 Bases in RNA Read	Q30 Bases in UMI	Estimated Nubmer of Cells	Mean Reads per Cell	Median Genes per Cell	Tolal genes Detected	Median UMI Counts per Cell	Reads Mapped to Genome
shCtrl	793238446	0.969	0.951	0.851	0.946	1418	559406	3566	21160	19366	0.856
shRNA1#	657505571	0.982	0.952	0.866	0.948	1732	379622	3351	21297	14667	0.867
shRNA2#	687371237	0.964	0.952	0.863	0.948	1873	366989	3752	21599	16518	0.837

## Sheet: ChIRP-seq
Sample	Raw Reads	Raw Base(G)	Clean Reads	Clean Base (G)	Mapped Reads	Mapped / Clean
Gm4665-1_FRRC19H000363-1a	181905664	27.29	164159872	24.62	159940963	0.9743
Gm4665-2_FRRC19H000364-1a	222886496	33.43	197223128	29.58	191878381	0.9729
Gm4665-3_FRRC19H000335-1a	158393176	23.76	156958832	23.54	152673856	0.9727
LacZ-1_FRRC19H000334-1a	185860456	27.88	184471968	27.67	155122478	0.8409
LacZ-2_FRRC19H000361-1a	173248952	25.98	151492144	22.72	138691058	0.9155
LacZ-3_FRRC19H000362-1a	257880696	38.68	206157840	30.92	168513418	0.8174
Input-1_FRRC190649509-1a	177981368	26.7	173916776	26.09	146507492	0.8424
Input-2_FRRC190649510-1a	186859064	28.03	184505328	27.67	157161638	0.8518
Input-3_FRRC190649511-1a	182826936	27.42	179395064	26.9	163590359	0.9119
