# Supplementary material for: Panoramic transcriptome analysis and functional screening of long noncoding RNAs in mouse spermatogenesis
Source: HighWire-hosted journal article supplement (doi:10.1101/gr.264333.120), 2020-12-16
Supplement: Supplemental_Table_S3.xlsx.xlsx [file Supplemental_Table_S3.xlsx.xlsx]

## Sheet: 1
Table S3. LncRNAs of six locus biotypes classification
Nearby gene in defined biotype						Biotype	LncRNA gene
Chromosome	Start	End	Gene symbol	Gene type	Strand		Chromosom	Start	End	Gene symbol	Gene type	Strand
chr1	3464977	3467285	RP23-115I1.6	lncRNA	-	XH	chr1	3466587	3513553	Gm1992	lncRNA	+
chr1	3512451	3514507	RP23-115I1.5	lncRNA	-	XT	chr1	3466587	3513553	Gm1992	lncRNA	+
chr1	9574548	9575649	Gm6161	processed_pseudogene	+	XO	chr1	9560832	9631175	2610203C22Rik	lncRNA	-
chr1	9601199	9627143	3110035E14Rik	protein_coding	+	XO	chr1	9560832	9631175	2610203C22Rik	lncRNA	-
chr1	9942463	9942549	Snord87	snoRNA	-	SD	chr1	9941959	9944118	Snhg6	lncRNA	-
chr1	13062025	13062345	Gm5250	processed_pseudogene	+	XH	chr1	13059401	13059951	Gm37162	lncRNA	-
chr1	14753346	14755992	Msc	protein_coding	-	XO	chr1	14752937	14776931	Gm9947	lncRNA	+
chr1	16662980	16663662	Gm7654	processed_pseudogene	-	XH	chr1	16657552	16662278	D030040B21Rik	lncRNA	+
chr1	17993010	17999622	Gm18775	unprocessed_pseudogene	-	SU	chr1	17994462	18059056	Gm28756	lncRNA	-
chr1	17993813	17997483	Gm17969	lncRNA	+	XH	chr1	17994462	18059056	Gm28756	lncRNA	-
chr1	18005961	18016186	Gm28755	unprocessed_pseudogene	-	SD	chr1	17994462	18059056	Gm28756	lncRNA	-
chr1	19062857	19063135	Gm28344	processed_pseudogene	+	XH	chr1	19063300	19104840	Gm15825	lncRNA	-
chr1	20679010	20679082	Mir206	miRNA	+	SD	chr1	20669882	20684298	Gm28653	lncRNA	+
chr1	20682769	20682887	Mir133b	miRNA	+	SD	chr1	20669882	20684298	Gm28653	lncRNA	+
chr1	20842535	20842666	Gm24723	snoRNA	-	XH	chr1	20836661	20839689	Gm28065	lncRNA	+
chr1	21272403	21272906	Gm7094	unprocessed_pseudogene	+	XH	chr1	21250359	21271593	Gm28836	lncRNA	-
chr1	23100473	23102253	4933415F23Rik	protein_coding	-	SD	chr1	23048295	23235673	Gm29506	lncRNA	-
chr1	23291701	23291784	Mir30c-2	miRNA	+	SD	chr1	23291537	23291935	Gm27028	lncRNA	+
chr1	23291701	23291784	Mir30c-2	miRNA	+	SU	chr1	23293729	23294075	Gm29107	lncRNA	+
chr1	25279445	25279551	Gm22260	snRNA	-	SD	chr1	25276404	25277954	Gm20172	lncRNA	-
chr1	25279445	25279551	Gm22260	snRNA	-	SU	chr1	25284218	25285248	Gm37543	lncRNA	-
chr1	25614946	25615515	Gm29214	processed_pseudogene	-	SD	chr1	25608250	25611184	Gm37011	lncRNA	-
chr1	27900419	27901072	Gm18776	processed_pseudogene	-	XO	chr1	27884046	27902396	Gm5524	lncRNA	+
chr1	32543686	32547294	Gm5415	protein_coding	-	XT	chr1	32539028	32542440	Gm37792	lncRNA	+
chr1	34433121	34433199	Mir5103	miRNA	-	SD	chr1	34427002	34433264	Gm37233	lncRNA	-
chr1	34436670	34439672	Ccdc115	protein_coding	-	SU	chr1	34439511	34444730	Gm28306	lncRNA	-
chr1	34439851	34449356	Imp4	lncRNA	+	XH	chr1	34439511	34444730	Gm28306	lncRNA	-
chr1	37871738	37876228	Lipt1	protein_coding	+	SD	chr1	37865299	37871388	Gm26805	lncRNA	+
chr1	37946736	37957759	Lyg1	lncRNA	-	XT	chr1	37933596	37954136	Gm15457	lncRNA	+
chr1	39548745	39548854	Snord89	snoRNA	-	SD	chr1	39547570	39552002	Gm15832	lncRNA	-
chr1	42695768	42703176	Pou3f3	protein_coding	+	SD	chr1	42694925	42744791	Gm20646	lncRNA	+
chr1	43270683	43271135	Gm29610	processed_pseudogene	+	XO	chr1	43250156	43302925	Gm29040	lncRNA	-
chr1	44086613	44102441	Tex30	protein_coding	-	SU	chr1	44091463	44110790	Gm29247	lncRNA	-
chr1	51289126	51302960	Sdpr	protein_coding	+	XO	chr1	51218386	51333779	9330175M20Rik	lncRNA	-
chr1	51317528	51318552	Gm5253	processed_pseudogene	-	SD	chr1	51218386	51333779	9330175M20Rik	lncRNA	-
chr1	52090635	52091066	Gm3940	processed_pseudogene	-	XO	chr1	52077261	52156087	Gm28177	lncRNA	+
chr1	52134443	52135330	Gm18301	unprocessed_pseudogene	-	XO	chr1	52077261	52156087	Gm28177	lncRNA	+
chr1	52522239	52522701	Rps27a-ps1	processed_pseudogene	+	SU	chr1	52522902	52582679	Gm553	lncRNA	+
chr1	52584518	52585159	Gm5527	processed_pseudogene	+	SD	chr1	52522902	52582679	Gm553	lncRNA	+
chr1	52584518	52585159	Gm5527	processed_pseudogene	+	XH	chr1	52570014	52580291	Gm28178	lncRNA	-
chr1	54769218	54769322	Gm24053	miRNA	+	SD	chr1	54681729	54767524	4930444A19Rik	lncRNA	+
chr1	55444074	55445024	Gm6644	processed_pseudogene	-	XO	chr1	55440904	55445930	Gm38056	lncRNA	+
chr1	56999155	56999275	Gm23943	miRNA	-	XO	chr1	56971412	57050084	9130024F11Rik	lncRNA	+
chr1	57518523	57519412	Gm8581	processed_pseudogene	-	SU	chr1	57520831	57523642	Gm37373	lncRNA	-
chr1	59155607	59156989	Gm19125	processed_pseudogene	+	SD	chr1	59151047	59169320	Gm29017	lncRNA	+
chr1	60592251	60592709	Gm11578	processed_pseudogene	-	SU	chr1	60594807	60596236	Gm38388	lncRNA	-
chr1	60792490	60793832	Gm11609	processed_pseudogene	+	SD	chr1	60778843	60803790	2310016D23Rik	lncRNA	+
chr1	61470441	61470543	Gm25839	snRNA	+	SD	chr1	61440101	61469475	Gm11588	lncRNA	+
chr1	61470441	61470543	Gm25839	snRNA	+	SU	chr1	61474951	61476028	Gm28449	lncRNA	+
chr1	61548122	61548511	Gm28094	processed_pseudogene	+	SD	chr1	61545882	61546163	Gm36943	lncRNA	+
chr1	63198031	63198156	Gm27512	miRNA	+	SU	chr1	63200313	63207967	Platr12	lncRNA	+
chr1	63273226	63273363	Gm24513	miRNA	-	SD	chr1	63266848	63273120	Gm11608	lncRNA	-
chr1	64690455	64725640	Ccnyl1	protein_coding	+	SD	chr1	64679871	64690659	2810408I11Rik	lncRNA	+
chr1	67257224	67257352	Gm26342	snoRNA	+	SD	chr1	67249200	67323609	Gm15668	lncRNA	+
chr1	72004288	72004767	Gm5528	processed_pseudogene	+	XO	chr1	71958998	72005195	4933417E11Rik	lncRNA	-
chr1	72004288	72004767	Gm5528	processed_pseudogene	+	XO	chr1	71983681	72038731	4930556G22Rik	lncRNA	-
chr1	73015074	73015909	Tnp1	protein_coding	-	XO	chr1	72984844	73025507	1700027A15Rik	lncRNA	+
chr1	73392246	73392399	Gm27315	misc_RNA	+	XO	chr1	73390775	73407569	Pinc	lncRNA	-
chr1	73763710	73763835	Gm25329	rRNA	+	XO	chr1	73750321	73841917	Gm29183	lncRNA	-
chr1	73763710	73763835	Gm25329	rRNA	+	XO	chr1	73618088	73864466	6030407O03Rik	lncRNA	-
chr1	73855477	73855575	Mir6351	miRNA	-	SD	chr1	73618088	73864466	6030407O03Rik	lncRNA	-
chr1	74278550	74279624	Gpbar1	protein_coding	+	SU	chr1	74281161	74281866	Gm28364	lncRNA	+
chr1	74279840	74284738	Aamp	protein_coding	-	XI	chr1	74281161	74281866	Gm28364	lncRNA	+
chr1	74854934	74857732	Cdk5r2	protein_coding	+	SD	chr1	74850895	74879953	Gm16582	lncRNA	+
chr1	74900652	74900726	Mir375	miRNA	-	XH	chr1	74902371	74907653	Gm15841	lncRNA	+
chr1	75168646	75171629	Zfand2b	protein_coding	+	XH	chr1	75171731	75185146	Gm29253	lncRNA	-
chr1	75171717	75180392	Abcb6	protein_coding	-	SU	chr1	75171731	75185146	Gm29253	lncRNA	-
chr1	75272199	75278415	Resp18	protein_coding	-	XI	chr1	75272605	75275652	Gm28902	lncRNA	+
chr1	76509560	76509643	Mir6343	miRNA	+	SD	chr1	76420692	76528422	Gm29069	lncRNA	+
chr1	77144753	77144846	Gm25974	rRNA	+	XO	chr1	77143227	77146992	Gm38265	lncRNA	-
chr1	78816758	78820028	Kcne4	protein_coding	+	SU	chr1	78821258	78822652	Gm29187	lncRNA	+
chr1	78816758	78820028	Kcne4	protein_coding	+	XO	chr1	78791623	79224511	Gm29536	lncRNA	-
chr1	78967637	78968079	Gm5830	processed_pseudogene	-	SD	chr1	78791623	79224511	Gm29536	lncRNA	-
chr1	79045608	79045701	Gm27745	miRNA	+	XO	chr1	78791623	79224511	Gm29536	lncRNA	-
chr1	80383104	80385185	Gm6189	processed_pseudogene	-	XO	chr1	80382822	80386251	Gm29125	lncRNA	+
chr1	82396697	82396817	Gm22112	miRNA	-	SD	chr1	82392493	82402746	Gm28940	lncRNA	-
chr1	82822471	82822861	Gm17764	processed_pseudogene	-	XH	chr1	82819835	82820377	Gm28942	lncRNA	+
chr1	83795912	83796032	Gm25754	miRNA	+	XO	chr1	83659550	83911644	4933436I20Rik	lncRNA	-
chr1	85115319	85117237	Gm16038	unprocessed_pseudogene	+	SD	chr1	85105946	85114035	A530040E14Rik	lncRNA	+
chr1	85332716	85342086	Gm7281	unprocessed_pseudogene	-	XO	chr1	85326729	85342615	Gm16025	lncRNA	+
chr1	85784713	85784962	Gm22906	misc_RNA	+	SD	chr1	85775271	85784694	9930111H07Rik	lncRNA	+
chr1	85928483	85940624	4933407L21Rik	protein_coding	+	XI	chr1	85933247	85937332	Gm28884	lncRNA	-
chr1	86302832	86307305	B3gnt7	protein_coding	+	XI	chr1	86303195	86304059	Gm28626	lncRNA	-
chr1	86356261	86356330	Snord82	snoRNA	-	XH	chr1	86359574	86373791	C130036L24Rik	lncRNA	+
chr1	86637552	86637608	Gm22955	miRNA	-	XH	chr1	86638201	86640454	Gm37022	lncRNA	+
chr1	87086694	87089928	Alppl2	protein_coding	-	XO	chr1	87080171	87096418	Gm29371	lncRNA	+
chr1	88055388	88219004	Ugt1a10	protein_coding	+	XI	chr1	88055393	88218584	Gm20528	lncRNA	-
chr1	88070800	88218997	Ugt1a9	lncRNA	+	XT	chr1	88055393	88218584	Gm20528	lncRNA	-
chr1	88087813	88219004	Ugt1a8	lncRNA	+	XT	chr1	88055393	88218584	Gm20528	lncRNA	-
chr1	88095062	88220002	Ugt1a7c	lncRNA	+	XT	chr1	88055393	88218584	Gm20528	lncRNA	-
chr1	88097918	88098131	Gm15373	unprocessed_pseudogene	+	XO	chr1	88055393	88218584	Gm20528	lncRNA	-
chr1	88103252	88219003	Ugt1a6b	lncRNA	+	XT	chr1	88055393	88218584	Gm20528	lncRNA	-
chr1	88126776	88127609	Gm15372	unprocessed_pseudogene	+	XO	chr1	88055393	88218584	Gm20528	lncRNA	-
chr1	88129581	88129833	Gm15370	unprocessed_pseudogene	+	XO	chr1	88055393	88218584	Gm20528	lncRNA	-
chr1	88134809	88218997	Ugt1a6a	lncRNA	+	XT	chr1	88055393	88218584	Gm20528	lncRNA	-
chr1	88146376	88146769	Gm15369	unprocessed_pseudogene	+	XO	chr1	88055393	88218584	Gm20528	lncRNA	-
chr1	88151038	88151881	Gm15374	unprocessed_pseudogene	+	XO	chr1	88055393	88218584	Gm20528	lncRNA	-
chr1	88153788	88154571	Gm15371	unprocessed_pseudogene	+	XO	chr1	88055393	88218584	Gm20528	lncRNA	-
chr1	88166012	88218997	Ugt1a5	lncRNA	+	XT	chr1	88055393	88218584	Gm20528	lncRNA	-
chr1	88186662	88187519	Gm15368	unprocessed_pseudogene	+	XO	chr1	88055393	88218584	Gm20528	lncRNA	-
chr1	88191901	88192683	Gm15376	unprocessed_pseudogene	+	XO	chr1	88055393	88218584	Gm20528	lncRNA	-
chr1	88200601	88218997	Ugt1a2	lncRNA	+	XT	chr1	88055393	88218584	Gm20528	lncRNA	-
chr1	88204732	88205782	Dnajb3	protein_coding	-	SD	chr1	88055393	88218584	Gm20528	lncRNA	-
chr1	88211959	88218997	Ugt1a1	lncRNA	+	XT	chr1	88055393	88218584	Gm20528	lncRNA	-
chr1	89684802	89685112	Gm26037	misc_RNA	+	XH	chr1	89650529	89683908	4933400F21Rik	lncRNA	-
chr1	89927956	89931179	Gbx2	lncRNA	-	XT	chr1	89930234	89933290	D130058E05Rik	lncRNA	+
chr1	92573125	92574206	Olfr1413	protein_coding	+	XT	chr1	92572374	92572749	1700054K02Rik	lncRNA	-
chr1	92574614	92574796	Gm28478	unprocessed_pseudogene	+	XH	chr1	92572374	92572749	1700054K02Rik	lncRNA	-
chr1	92850378	92850443	Mir149	miRNA	+	XH	chr1	92842177	92848771	Gm29480	lncRNA	-
chr1	92906981	92908435	Dusp28	lncRNA	+	XH	chr1	92908378	92910764	5033417F24Rik	lncRNA	-
chr1	92934376	92947941	Capn10	protein_coding	+	XO	chr1	92933526	92950590	9430060I03Rik	lncRNA	-
chr1	93306694	93307239	Gm7867	processed_pseudogene	-	XO	chr1	93305964	93317309	Gm28535	lncRNA	+
chr1	96617099	96617205	Gm26245	snRNA	+	XO	chr1	96612057	96662573	4930533P14Rik	lncRNA	-
chr1	96645420	96646170	Gm1833	processed_pseudogene	+	XO	chr1	96612057	96662573	4930533P14Rik	lncRNA	-
chr1	97024681	97025928	Gm6430	lncRNA	+	XH	chr1	97024516	97025565	Gm28901	lncRNA	-
chr1	98049822	98049928	Gm24465	snRNA	+	XO	chr1	98031116	98057680	B230216N24Rik	lncRNA	-
chr1	105455971	105458829	Gm3608	pseudogene	+	XO	chr1	105382260	105569139	Gm28403	lncRNA	-
chr1	106546496	106546631	Mir3473f	miRNA	-	XO	chr1	106541943	106575045	D630008O14Rik	lncRNA	+
chr1	107952837	107953435	Gm18448	processed_pseudogene	+	SD	chr1	107917259	108028337	D830032E09Rik	lncRNA	+
chr1	107963122	107963307	Gm28282	processed_pseudogene	-	XO	chr1	107917259	108028337	D830032E09Rik	lncRNA	+
chr1	111385918	111386698	Gm19927	processed_pseudogene	+	XO	chr1	111385690	111446645	Gm29088	lncRNA	-
chr1	118459141	118459265	Gm22710	snRNA	-	SD	chr1	118458652	118459267	2900060B14Rik	lncRNA	-
chr1	119526160	119528983	Tmem185b	lncRNA	+	XT	chr1	119520090	119526359	Gm27184	lncRNA	-
chr1	119526160	119528983	Tmem185b	protein_coding	+	XH	chr1	119529480	119536165	3830432H09Rik	lncRNA	-
chr1	119526425	119528224	AC132393.1	pseudogene	+	XH	chr1	119520090	119526359	Gm27184	lncRNA	-
chr1	119526425	119528224	AC132393.1	pseudogene	+	XH	chr1	119529480	119536165	3830432H09Rik	lncRNA	-
chr1	119530211	119530314	Gm25322	snRNA	+	XH	chr1	119520090	119526359	Gm27184	lncRNA	-
chr1	119530211	119530314	Gm25322	snRNA	+	XO	chr1	119529480	119536165	3830432H09Rik	lncRNA	-
chr1	119787769	119788086	Gm3851	processed_pseudogene	+	XH	chr1	119790763	119798925	Gm37745	lncRNA	-
chr1	119793520	119794229	Gm29657	processed_pseudogene	+	XO	chr1	119790763	119798925	Gm37745	lncRNA	-
chr1	120825247	120825456	Gm29344	processed_pseudogene	-	XO	chr1	120816500	120836997	Gm29345	lncRNA	+
chr1	123389801	123389931	Gm24791	snoRNA	-	SU	chr1	123391111	123393171	Gm37066	lncRNA	-
chr1	128128410	128128889	Gm29383	processed_pseudogene	-	XH	chr1	128132157	128134652	Gm37588	lncRNA	+
chr1	131962967	131982969	Slc45a3	protein_coding	+	SD	chr1	131962954	132014486	Gm29103	lncRNA	+
chr1	132100639	132100754	Gm26034	snRNA	+	SU	chr1	132102365	132108323	Gm37120	lncRNA	+
chr1	132284453	132284809	Gm7241	processed_pseudogene	+	XH	chr1	132274716	132280411	Gm29630	lncRNA	-
chr1	135150666	135150766	Gm26280	rRNA	-	XH	chr1	135152963	135153806	Gm15445	lncRNA	+
chr1	135253575	135258568	Elf3	protein_coding	-	XO	chr1	135248561	135266443	Gm26642	lncRNA	+
chr1	136259797	136260873	Gpr25	protein_coding	-	XO	chr1	136259407	136274406	Gm26781	lncRNA	+
chr1	136624901	136630053	Zfp281	protein_coding	+	SD	chr1	136622098	13624650	Gm26598	lncRNA	+
chr1	136697374	136697471	Gm24086	snRNA	+	SD	chr1	136696211	136726142	Platr22	lncRNA	+
chr1	137966455	137966541	Mir181a-1	miRNA	+	SD	chr1	137898595	138000384	Gm4258	lncRNA	+
chr1	137966455	137966541	Mir181a-1	miRNA	+	SU	chr1	137971174	137972315	Gm37632	lncRNA	+
chr1	137966455	137966541	Mir181a-1	miRNA	+	SU	chr1	137966531	137969918	A430106G13Rik	lncRNA	+
chr1	137966455	137966541	Mir181a-1	miRNA	+	XO	chr1	137928389	137969240	Gm26936	lncRNA	-
chr1	137966639	137966718	Mir181b-1	miRNA	+	SD	chr1	137966531	137969918	A430106G13Rik	lncRNA	+
chr1	137966639	137966718	Mir181b-1	miRNA	+	SD	chr1	137898595	138000384	Gm4258	lncRNA	+
chr1	137966639	137966718	Mir181b-1	miRNA	+	SU	chr1	137971174	137972315	Gm37632	lncRNA	+
chr1	137966639	137966718	Mir181b-1	miRNA	+	XO	chr1	137928389	137969240	Gm26936	lncRNA	-
chr1	137987657	137987776	Gm23782	rRNA	-	XO	chr1	137898595	138000384	Gm4258	lncRNA	+
chr1	138878262	138878377	n-R5s217	rRNA	-	SD	chr1	138876272	138876951	1700019P21Rik	lncRNA	-
chr1	143778928	143779062	Gm25663	snoRNA	+	SD	chr1	143777642	143781307	Gm29170	lncRNA	+
chr1	146420436	146421036	Gm5263	processed_pseudogene	+	XO	chr1	146419436	146495060	Gm29514	lncRNA	-
chr1	150319417	150333906	Pdc	lncRNA	+	XH	chr1	150320681	150346771	2310030A07Rik	lncRNA	-
chr1	151136507	151137780	Gm8941	processed_pseudogene	+	SU	chr1	151138034	151142345	C730036E19Rik	lncRNA	+
chr1	152729159	152730559	Gm7278	processed_pseudogene	-	SU	chr1	152731206	152751824	Gm28792	lncRNA	-
chr1	153440079	153440218	Gm25588	snoRNA	+	SU	chr1	153443481	153444300	Gm37669	lncRNA	+
chr1	153740349	153745468	Rgs16	lncRNA	+	XH	chr1	153743552	153749324	Gm28513	lncRNA	-
chr1	153891742	153893058	Teddm1a	lncRNA	+	XT	chr1	153889741	153892297	Gm38352	lncRNA	-
chr1	154080095	154080199	Gm25336	snoRNA	-	SD	chr1	154037597	154117951	A830008E24Rik	lncRNA	-
chr1	155031739	155031949	Gm29441	processed_pseudogene	+	XO	chr1	155011332	155057179	Gm29282	lncRNA	-
chr1	155855449	155855707	RP24-429M15.5	processed_pseudogene	+	SD	chr1	155818494	155859591	Gm37571	lncRNA	+
chr1	158505625	158505733	Mir488	miRNA	+	XO	chr1	158485032	158554299	Gm37679	lncRNA	-
chr1	159168160	159168642	Gm4953	processed_pseudogene	-	XH	chr1	159134272	159166387	4930562F17Rik	lncRNA	+
chr1	159340283	159340422	Scarna3a	snoRNA	+	XH	chr1	159337414	159337819	Gm37088	lncRNA	-
chr1	160295864	160295972	Mir1927	miRNA	-	XO	chr1	160264324	160443072	Gm36975	lncRNA	+
chr1	160645573	160645704	Gm23528	snoRNA	+	XH	chr1	160648023	160650302	Gm37873	lncRNA	-
chr1	161035394	161035473	Gm26224	snoRNA	+	SD	chr1	161030582	161031456	Gm37362	lncRNA	+
chr1	161035850	161035911	Gm22489	snoRNA	+	SD	chr1	161030582	161031456	Gm37362	lncRNA	+
chr1	161035850	161035911	Gm22489	snoRNA	+	SU	chr1	161040620	161041414	Gm37634	lncRNA	+
chr1	161036057	161036139	Gm22357	snoRNA	+	SD	chr1	161030582	161031456	Gm37362	lncRNA	+
chr1	161036057	161036139	Gm22357	snoRNA	+	SU	chr1	161040620	161041414	Gm37634	lncRNA	+
chr1	161036682	161036741	Gm23212	snoRNA	+	SU	chr1	161040620	161041414	Gm37634	lncRNA	+
chr1	161036984	161037049	Gm23436	snoRNA	+	SU	chr1	161040620	161041414	Gm37634	lncRNA	+
chr1	161037356	161037439	Mir5117	snoRNA	+	SU	chr1	161040620	161041414	Gm37634	lncRNA	+
chr1	161037601	161037681	Gm24489	snoRNA	+	SU	chr1	161040620	161041414	Gm37634	lncRNA	+
chr1	161038082	161038158	Snord47	snoRNA	+	SU	chr1	161040620	161041414	Gm37634	lncRNA	+
chr1	161038308	161038383	Gm25789	snoRNA	+	SU	chr1	161040620	161041414	Gm37634	lncRNA	+
chr1	161969186	161973435	Pigc	protein_coding	+	SU	chr1	161969200	162027106	Gm38304	lncRNA	+
chr1	162217814	162217923	Mir199a-2	miRNA	+	SD	chr1	162217623	162225550	Dnm3os	lncRNA	+
chr1	162223368	162223477	Mir214	miRNA	+	SD	chr1	162217623	162225550	Dnm3os	lncRNA	+
chr1	163054818	163054951	Gm22671	snoRNA	-	XO	chr1	162983014	163066682	Gm37273	lncRNA	+
chr1	164931644	164935527	Xcl1	protein_coding	-	XO	chr1	164863133	164936775	Gm20743	lncRNA	+
chr1	165493422	165495001	RP23-469D21.2	lncRNA	+	XT	chr1	165493791	165495167	Gm38325	lncRNA	-
chr1	165497999	165498249	Gm23599	misc_RNA	-	SD	chr1	165493791	165495167	Gm38325	lncRNA	-
chr1	165785834	165785951	Gm24808	rRNA	-	XO	chr1	165781075	165789367	Gm16565	lncRNA	+
chr1	167290125	167290225	Mir6347	miRNA	+	SD	chr1	167285068	167289856	Gm2453	lncRNA	+
chr1	169928648	169934653	1700084C01Rik	protein_coding	+	XI	chr1	169932698	169934248	Gm15852	lncRNA	-
chr1	170175180	170176319	RP23-124N16.3	lncRNA	+	XH	chr1	170175382	170177772	Gm37502	lncRNA	-
chr1	170175382	170177772	RP23-124N16.4	lncRNA	-	XH	chr1	170175180	170176319	Gm37748	lncRNA	+
chr1	170873498	170885540	Dusp12	lncRNA	-	XT	chr1	170868645	170881721	Gm9929	lncRNA	+
chr1	170885065	170885881	Gm26620	protein_coding	+	SD	chr1	170868645	170881721	Gm9929	lncRNA	+
chr1	171503048	171503163	Gm24871	snRNA	-	SD	chr1	171500568	171504111	B930036N10Rik	lncRNA	-
chr1	171503478	171504750	Alyref2	lncRNA	+	XT	chr1	171500568	171504111	B930036N10Rik	lncRNA	-
chr1	171679336	171679870	RP23-145F9.2	processed_pseudogene	-	SD	chr1	171676684	171681980	A630035G10Rik	lncRNA	-
chr1	172088474	172088803	RP23-244J9.1	processed_pseudogene	+	XH	chr1	172089910	172092679	Gm37756	lncRNA	-
chr1	178319130	178322693	Cox20	protein_coding	+	XH	chr1	178313328	178318549	B230369F24Rik	lncRNA	-
chr1	181022663	181022773	RP23-390I1.5	unprocessed_pseudogene	-	XH	chr1	181026278	181029729	Gm37086	lncRNA	+
chr1	184617248	184617727	RP24-286C21.2	processed_pseudogene	+	XO	chr1	184610280	184629473	Gm37800	lncRNA	-
chr1	185242907	185243038	Snora36b	snoRNA	+	XH	chr1	185243713	185247889	Gm34882	lncRNA	-
chr1	185313319	185313385	Mir194-1	miRNA	+	SD	chr1	185312187	185313803	2010103J01Rik	lncRNA	+
chr1	185313581	185313692	Mir215	miRNA	+	SD	chr1	185312187	185313803	2010103J01Rik	lncRNA	+
chr1	186960508	186961513	Gm3809	processed_pseudogene	+	XH	chr1	186964528	186967603	Gm37912	lncRNA	-
chr1	186967416	186970627	D1Pas1	lncRNA	+	XH	chr1	186964528	186967603	Gm37912	lncRNA	-
chr1	192136689	192136821	CAAA01201205.2	TEC	+	SU	chr1	192136896	192151026	Gm10516	lncRNA	+
chr1	193507463	193507530	Mir205	miRNA	-	SD	chr1	193507238	193510174	Mir205hg	lncRNA	-
chr1	195036829	195038908	RP23-82P18.2	lncRNA	-	XT	chr1	194976375	195037904	A330023F24Rik	lncRNA	+
chr1	195037040	195037123	Mir29b-2	miRNA	+	SD	chr1	194976375	195037904	A330023F24Rik	lncRNA	+
chr1	195037547	195037634	Mir29c	miRNA	+	SD	chr1	194976375	195037904	A330023F24Rik	lncRNA	+
chr1	195037547	195037634	Mir29c	miRNA	+	SU	chr1	195042383	195044679	Gm37366	lncRNA	+
chr10	10100953	10101116	Gm25682	snRNA	+	SD	chr10	9976627	10207981	Gm28905	lncRNA	+
chr10	10100953	10101116	Gm25682	snRNA	+	XO	chr10	10100420	10110099	Gm48281	lncRNA	-
chr10	14233513	14233623	Gm24343	snoRNA	+	SD	chr10	14226489	14266790	Gm48845	lncRNA	+
chr10	14233513	14233623	Gm24343	snoRNA	+	XO	chr10	14226667	14233958	Gm48844	lncRNA	-
chr10	18779813	18785011	Gm4922	protein_coding	-	XO	chr10	18743469	18837979	Gm32926	lncRNA	+
chr10	22224280	22253819	Gm1972	unprocessed_pseudogene	+	XO	chr10	22187013	22302835	Gm26740	lncRNA	-
chr10	22262742	22263367	Hmgb1-ps8	processed_pseudogene	-	SD	chr10	22187013	22302835	Gm26740	lncRNA	-
chr10	22281454	22281736	Gm26528	processed_pseudogene	-	SD	chr10	22187013	22302835	Gm26740	lncRNA	-
chr10	22817279	22820128	Tcf21	protein_coding	-	XO	chr10	22815749	22823330	Gm10824	lncRNA	+
chr10	24567077	24568134	Gm6893	processed_pseudogene	-	SD	chr10	24549441	24597108	Gm15270	lncRNA	-
chr10	24595442	24598683	Ctgf	lncRNA	+	XT	chr10	24549441	24597108	Gm15270	lncRNA	-
chr10	29349585	29349691	Gm25596	snRNA	+	XH	chr10	29351879	29353893	Gm47483	lncRNA	-
chr10	31317169	31317281	n-R5s76	rRNA	-	XH	chr10	31321418	31324022	Gm48865	lncRNA	+
chr10	33994989	33995054	Gm17567	protein_coding	-	SD	chr10	33987216	33995055	A830082N09Rik	lncRNA	-
chr10	34297442	34301320	Tspyl4	lncRNA	+	XH	chr10	34295912	34298907	Gm47512	lncRNA	-
chr10	34297442	34301320	Tspyl4	protein_coding	+	SD	chr10	34293558	34296573	Gm47508	lncRNA	+
chr10	38179453	38179584	Gm24889	snoRNA	+	SD	chr10	38175780	38181903	4930591E09Rik	lncRNA	+
chr10	40258467	40258680	Rnu3a	snoRNA	+	SU	chr10	40260934	40261333	A930033M14Rik	lncRNA	+
chr10	42761596	42763635	Gm26860	lincRNA	-	SD	chr10	42740539	42758660	Gm15199	lncRNA	-
chr10	43524102	43524617	Gm9803	protein_coding	+	SD	chr10	43518571	43555817	Gm47889	lncRNA	+
chr10	43525121	43540994	1700021F05Rik	protein_coding	-	XO	chr10	43518571	43555817	Gm47889	lncRNA	+
chr10	43821231	43822235	Gm9034	processed_pseudogene	+	SU	chr10	43824200	43833392	4933404K13Rik	lncRNA	+
chr10	44597240	44597327	Gm22087	snRNA	-	SU	chr10	44597889	44602174	Gm48065	lncRNA	-
chr10	44597240	44597327	Gm22087	snRNA	-	XH	chr10	44598720	44689081	Gm35154	lncRNA	+
chr10	44668384	44668494	Gm27977	rRNA	+	SD	chr10	44598720	44689081	Gm35154	lncRNA	+
chr10	44732353	44732467	Gm22503	snRNA	+	SD	chr10	44730940	44823886	Gm47392	lncRNA	+
chr10	44732353	44732467	Gm22503	snRNA	+	XO	chr10	44730769	44738900	4930431F10Rik	lncRNA	-
chr10	44922067	44922177	Gm24271	miRNA	-	SD	chr10	44902558	44943294	Gm40638	lncRNA	-
chr10	45816747	45816861	Gm27410	miRNA	-	XO	chr10	45807562	45852283	D030045P18Rik	lncRNA	+
chr10	51888625	51888752	Gm23906	snoRNA	+	XO	chr10	51863852	51970291	Gm40646	lncRNA	-
chr10	52384659	52385093	Rps19-ps10	processed_pseudogene	-	SD	chr10	52379196	52381226	Gm47580	lncRNA	-
chr10	53337686	53345999	Pln	protein_coding	+	XI	chr10	53337753	53345085	Gm47644	lncRNA	-
chr10	58704576	58704651	Gm25055	snoRNA	-	XH	chr10	58696745	58704279	BB019430	lncRNA	+
chr10	63100156	63100605	Atoh7	protein_coding	+	SD	chr10	63098349	63098690	Gm38063	lncRNA	+
chr10	66170401	66170506	Gm22829	snRNA	-	SD	chr10	66120605	66254223	1700023F02Rik	lncRNA	-
chr10	66170401	66170506	Gm22829	snRNA	-	XO	chr10	66145296	66179514	4930407I19Rik	lncRNA	+
chr10	70285549	70288176	Gm9877	pseudogene	-	SD	chr10	70284235	70284953	Gm7097	lncRNA	-
chr10	70882104	70882210	Gm24486	snRNA	+	SD	chr10	70868644	70934324	4930533K18Rik	lncRNA	+
chr10	73201695	73202766	Gm5778	processed_pseudogene	+	XO	chr10	73201399	73327175	Gm15398	lncRNA	-
chr10	76562272	76570201	Spatc1l	lncRNA	+	XT	chr10	76564765	76570532	Gm15343	lncRNA	-
chr10	78425670	78427619	Cstb	protein_coding	+	SU	chr10	78428271	78438847	4921516A02Rik	lncRNA	+
chr10	78434799	78434902	Mir6410	miRNA	+	SD	chr10	78428271	78438847	4921516A02Rik	lncRNA	+
chr10	78518623	78518738	Gm25164	rRNA	+	XO	chr10	78501925	78520219	Gm47944	lncRNA	-
chr10	78746924	78753067	Ccdc105	lncRNA	-	XH	chr10	78747130	78767585	Gm30400	lncRNA	+
chr10	78981050	78984721	Olfr1352	protein_coding	+	XO	chr10	78972103	79012892	Gm47343	lncRNA	-
chr10	79862587	79862652	Mir6910	miRNA	+	XH	chr10	79863937	79864434	Gm17134	lncRNA	-
chr10	80278164	80278232	Mir6911	miRNA	+	XH	chr10	80282444	80283006	Gm15122	lncRNA	-
chr10	80583654	80590341	Abhd17a	protein_coding	-	SU	chr10	80587965	80589790	Gm29093	lncRNA	-
chr10	81178950	81179013	Snord37	snoRNA	+	XH	chr10	81182605	81183849	4930442H23Rik	lncRNA	-
chr10	81198170	81202037	Nmrk2	protein_coding	-	XO	chr10	81194609	81210877	Atcayos	lncRNA	+
chr10	84614719	84614813	Gm25657	snRNA	+	XH	chr10	84618341	84622578	Gm17249	lncRNA	-
chr10	86655939	86657381	Gm5174	protein_coding	+	SU	chr10	86657405	86671018	Gm48485	lncRNA	+
chr10	86845811	86845908	Gm24093	miRNA	+	SD	chr10	86839094	86874954	Gm16268	lncRNA	+
chr10	86909479	86912716	Gm16270	transcribed_processed_pseudogene	+	SD	chr10	86908761	86910013	Gm16280	lncRNA	+
chr10	87000297	87000705	Gm16269	processed_pseudogene	+	SD	chr10	86972216	87028015	Gm16271	lncRNA	+
chr10	87289493	87291827	RP23-198F7.2	TEC	+	SD	chr10	87230760	87297555	4930555G07Rik	lncRNA	+
chr10	88091072	88092375	Pmch	protein_coding	+	SD	chr10	88088198	88089824	Gm48308	lncRNA	+
chr10	92071661	92071815	Gm27544	misc_RNA	-	SD	chr10	92071037	92165170	Rmst	lncRNA	-
chr10	92072086	92072185	Mir135a-2	miRNA	-	SD	chr10	92071037	92165170	Rmst	lncRNA	-
chr10	92075169	92075361	Gm27999	misc_RNA	-	SD	chr10	92071037	92165170	Rmst	lncRNA	-
chr10	92075491	92075652	Gm27608	misc_RNA	-	SD	chr10	92071037	92165170	Rmst	lncRNA	-
chr10	92101665	92101927	Gm27588	misc_RNA	-	SD	chr10	92071037	92165170	Rmst	lncRNA	-
chr10	92103707	92103909	Gm27753	misc_RNA	-	SD	chr10	92071037	92165170	Rmst	lncRNA	-
chr10	92133222	92133347	Gm27582	misc_RNA	-	SD	chr10	92071037	92165170	Rmst	lncRNA	-
chr10	92134963	92135070	Gm27366	misc_RNA	-	SD	chr10	92071037	92165170	Rmst	lncRNA	-
chr10	92135700	92135808	Gm27419	misc_RNA	-	SD	chr10	92071037	92165170	Rmst	lncRNA	-
chr10	92137140	92137223	Mir1251	miRNA	-	SD	chr10	92071037	92165170	Rmst	lncRNA	-
chr10	92162103	92164690	Gm26700	lincRNA	+	XO	chr10	92071037	92165170	Rmst	lncRNA	-
chr10	92162105	92162164	Gm27621	misc_RNA	-	SD	chr10	92071037	92165170	Rmst	lncRNA	-
chr10	94586137	94586199	Mir7211	miRNA	-	SD	chr10	94567828	94612084	Tmcc3os	lncRNA	-
chr10	95898603	95898735	Gm24433	snoRNA	+	SD	chr10	95893443	95897257	Gm47725	lncRNA	+
chr10	96855582	96855670	Gm24587	miRNA	-	XO	chr10	96801039	96884708	Gm48521	lncRNA	+
chr10	97693059	97694926	Ccer1	protein_coding	+	XO	chr10	97681414	97967090	Gm10754	lncRNA	-
chr10	97744757	97744884	Gm25658	snoRNA	-	SD	chr10	97681414	97967090	Gm10754	lncRNA	-
chr10	97744757	97744884	Gm25658	snoRNA	-	XO	chr10	97714772	97753702	4930525C09Rik	lncRNA	+
chr10	99263231	99267488	Dusp6	protein_coding	+	SU	chr10	99267896	99279084	Gm48089	lncRNA	+
chr10	99263231	99267488	Dusp6	protein_coding	+	XT	chr10	99267686	99270446	Gm34921	lncRNA	-
chr10	99757705	99759658	Csl	lncRNA	-	XH	chr10	99759506	99830562	Gm35206	lncRNA	+
chr10	99757705	99759658	Csl	protein_coding	-	XO	chr10	99719143	99891158	Gm47578	lncRNA	+
chr10	100139501	100139610	Gm22918	miRNA	+	XO	chr10	100129868	100144126	Gm35533	lncRNA	-
chr10	100144254	100144363	Gm25287	miRNA	+	XH	chr10	100129868	100144126	Gm35533	lncRNA	-
chr10	100376462	100377335	Gm8723	pseudogene	-	SD	chr10	100372863	100383831	Gm47631	lncRNA	-
chr10	100381647	100382560	Gm4312	protein_coding	-	SD	chr10	100372863	100383831	Gm47631	lncRNA	-
chr10	105140207	105140335	Gm25422	snoRNA	-	SU	chr10	105142236	105142942	Gm36997	lncRNA	-
chr10	105520460	105520643	Gm15664	unprocessed_pseudogene	+	XH	chr10	105514681	105516649	Gm48204	lncRNA	-
chr10	105804087	105804197	n-R5s80	rRNA	-	SU	chr10	105806538	105808867	Gm48298	lncRNA	-
chr10	108428067	108428160	Gm25591	miRNA	+	SD	chr10	108417251	108453297	Gm36283	lncRNA	+
chr10	110796173	110796300	Gm23698	snoRNA	+	XO	chr10	110784585	110896550	1700020G17Rik	lncRNA	-
chr10	110892298	110892419	Gm22186	snoRNA	-	SD	chr10	110784585	110896550	1700020G17Rik	lncRNA	-
chr10	111506286	111508645	Phlda1	protein_coding	+	XI	chr10	111506575	111507662	Gm28592	lncRNA	-
chr10	112925430	112929001	Atxn7l3b	lncRNA	-	XT	chr10	112928501	112931155	Gm26596	lncRNA	+
chr10	112931424	112931583	Gm22507	snRNA	+	SD	chr10	112928501	112931155	Gm26596	lncRNA	+
chr10	115817284	115849893	Tspan8	protein_coding	+	XO	chr10	115802416	115869522	4930422I22Rik	lncRNA	-
chr10	116531646	116531740	Gm25190	miRNA	-	XO	chr10	116509052	116583515	5330438D12Rik	lncRNA	+
chr10	117045341	117046768	Lrrc10	protein_coding	+	SD	chr10	117043746	117045101	Gm10747	lncRNA	+
chr10	117183335	117183411	Gm26311	snoRNA	-	XH	chr10	117177303	117181112	4930423D24Rik	lncRNA	+
chr10	118441047	118445892	Ifng	protein_coding	+	SU	chr10	118441419	118444140	Gm49751	lncRNA	+
chr10	120361275	120476469	Hmga2	protein_coding	+	SD	chr10	120364157	120384336	1700006J14Rik	lncRNA	+
chr10	122448499	122453453	Avpr1a	protein_coding	+	XO	chr10	122405113	122546498	Gm48877	lncRNA	-
chr10	123196876	123196971	Gm27920	miRNA	-	XO	chr10	123196695	123199418	Gm4129	lncRNA	+
chr10	123432566	123432749	Gm22958	snRNA	+	SU	chr10	123437500	123440600	Gm47801	lncRNA	+
chr10	126710282	126710391	Mir378d	miRNA	-	SU	chr10	126714005	126719394	Gm47966	lncRNA	-
chr10	127067317	127070261	Tspan31	protein_coding	-	XH	chr10	127070375	127074796	A730063M14Rik	lncRNA	+
chr10	127190378	127195728	Dtx3	lncRNA	-	XH	chr10	127195249	127202643	F420014N23Rik	lncRNA	+
chr10	127329889	127341589	Gli1	lncRNA	-	XH	chr10	127332391	127370406	Gm47200	lncRNA	+
chr10	127349402	127351772	Inhbe	protein_coding	-	XO	chr10	127332391	127370406	Gm47200	lncRNA	+
chr10	127356328	127370544	Inhbc	lncRNA	-	XT	chr10	127332391	127370406	Gm47200	lncRNA	+
chr10	127660918	127668568	Nab2	protein_coding	-	XI	chr10	127663839	127665484	Gm16229	lncRNA	+
chr10	128084143	128084216	Gm25206	snoRNA	+	XH	chr10	128081354	128082970	Gm47438	lncRNA	-
chr10	128085289	128085360	Mir677	snoRNA	+	XH	chr10	128081354	128082970	Gm47438	lncRNA	-
chr10	128541963	128547774	Zc3h10	lncRNA	-	XT	chr10	128522263	128545359	Gm29585	lncRNA	+
chr10	128548114	128549305	Rpl41	protein_coding	-	XH	chr10	128522263	128545359	Gm29585	lncRNA	+
chr10	128790953	128800824	Mmp19	protein_coding	+	XO	chr10	128789429	128801393	Gm47093	lncRNA	-
chr10	128800036	128804370	Tmem198b	protein_coding	-	SD	chr10	128789429	128801393	Gm47093	lncRNA	-
chr10	130557348	130557464	Gm23793	snRNA	-	XO	chr10	130542347	130571793	Gm31793	lncRNA	+
chr11	3196454	3196824	Fau-ps2	processed_pseudogene	-	SD	chr11	3193516	3194263	Gm12735	lncRNA	-
chr11	3470902	3471377	Gm11945	processed_pseudogene	-	XO	chr11	3452365	3479831	8430429K09Rik	lncRNA	+
chr11	3474285	3474401	Gm24439	snoRNA	-	XO	chr11	3452365	3479831	8430429K09Rik	lncRNA	+
chr11	3644776	3644952	Gm27624	misc_RNA	-	SD	chr11	3639785	3649673	Tug1	lncRNA	-
chr11	3645286	3645521	Gm27517	misc_RNA	-	SD	chr11	3639785	3649673	Tug1	lncRNA	-
chr11	3646942	3647029	Gm27937	misc_RNA	-	SD	chr11	3639785	3649673	Tug1	lncRNA	-
chr11	3647179	3647325	Gm27640	misc_RNA	-	SD	chr11	3639785	3649673	Tug1	lncRNA	-
chr11	4620067	4621698	Gm11032	lncRNA	+	XH	chr11	4620275	4630011	Gm11961	lncRNA	-
chr11	5495192	5495446	Gm11962	processed_pseudogene	-	XH	chr11	5498840	5505699	Gm11963	lncRNA	+
chr11	6472225	6472277	Gm22123	miRNA	-	XH	chr11	6475425	6493535	Gm11973	lncRNA	+
chr11	6528033	6528165	Gm22457	snoRNA	-	SD	chr11	6525591	6528779	Snhg15	lncRNA	-
chr11	6718918	6719495	Gm11976	processed_pseudogene	-	SD	chr11	6716001	6720037	Gm11981	lncRNA	-
chr11	14162079	14162457	Gm12005	processed_pseudogene	+	XO	chr11	14072103	14179041	4930554G24Rik	lncRNA	-
chr11	14599314	14599862	Pom121l12	processed_pseudogene	+	XH	chr11	14560355	14599225	1700046C09Rik	lncRNA	-
chr11	16951375	16954772	Fbxo48	protein_coding	+	XH	chr11	16935154	16951282	Eldr	lncRNA	-
chr11	20142568	20142790	Gm12030	processed_pseudogene	+	XH	chr11	20145567	20146344	Gm12031	lncRNA	-
chr11	21491314	21491886	Gm12045	processed_pseudogene	+	XH	chr11	21494730	21511178	4932414J04Rik	lncRNA	-
chr11	21493625	21493955	Gm12046	processed_pseudogene	-	SU	chr11	21494730	21511178	4932414J04Rik	lncRNA	-
chr11	22846868	22846969	Gm23772	snoRNA	+	SD	chr11	22839299	22842604	Gm20456	lncRNA	+
chr11	23063133	23063232	Gm23740	rRNA	-	XH	chr11	23067998	23075574	Gm12059	lncRNA	+
chr11	24552438	24553962	Gm12067	processed_pseudogene	-	XO	chr11	24481909	24569952	4933430M04Rik	lncRNA	+
chr11	24552438	24553962	Gm12067	processed_pseudogene	-	XO	chr11	24426246	24722646	Gm12068	lncRNA	+
chr11	24553986	24554058	Gm22787	snRNA	-	XO	chr11	24481909	24569952	4933430M04Rik	lncRNA	+
chr11	24553986	24554058	Gm22787	snRNA	-	XO	chr11	24426246	24722646	Gm12068	lncRNA	+
chr11	24679568	24679711	Gm25507	miRNA	-	XO	chr11	24426246	24722646	Gm12068	lncRNA	+
chr11	25238588	25238715	Gm24255	snoRNA	-	XO	chr11	25232626	25367137	4933427E13Rik	lncRNA	+
chr11	28757012	28757083	Mir216a	miRNA	+	SD	chr11	28751633	28815767	Gm12082	lncRNA	+
chr11	28763728	28763835	Mir217	miRNA	+	SD	chr11	28751633	28815767	Gm12082	lncRNA	+
chr11	29511757	29515033	Prorsd1	protein_coding	-	XT	chr11	29515086	29517355	Gm12089	lncRNA	+
chr11	29601784	29602613	Gm12091	processed_pseudogene	-	XH	chr11	29595787	29597700	Gm12088	lncRNA	+
chr11	30754572	30754961	Gm12101	processed_pseudogene	-	XO	chr11	30750832	30756147	Gm12100	lncRNA	+
chr11	32910373	32910603	Gm12112	processed_pseudogene	+	XO	chr11	32903137	32926160	Gm12111	lncRNA	-
chr11	33200752	33203589	Tlx3	protein_coding	-	XH	chr11	33204055	33221477	Gm12116	lncRNA	+
chr11	41789488	41789819	Gm12143	processed_pseudogene	-	XO	chr11	41710342	41973117	A230004M16Rik	lncRNA	+
chr11	44617317	44617773	AL603913.1	pseudogene	+	XH	chr11	44610837	44617016	Gm37695	lncRNA	-
chr11	45280594	45280954	Gm12161	processed_pseudogene	-	SD	chr11	45274418	45296390	Gm37312	lncRNA	-
chr11	45813604	45813992	Gm12163	processed_pseudogene	+	SD	chr11	45808087	45841171	F630206G17Rik	lncRNA	+
chr11	45829319	45829869	Gm12164	processed_pseudogene	+	SD	chr11	45808087	45841171	F630206G17Rik	lncRNA	+
chr11	45829779	45829887	Gm22751	miRNA	+	SD	chr11	45808087	45841171	F630206G17Rik	lncRNA	+
chr11	46539782	46540081	Gm12170	unprocessed_pseudogene	-	XH	chr11	46544209	46557067	Gm12171	lncRNA	+
chr11	46646687	46646959	Gm12173	unprocessed_pseudogene	-	SD	chr11	46636516	46645006	Gm4926	lncRNA	-
chr11	50232245	50232306	Mir6919	miRNA	+	SU	chr11	50236953	50288839	Gm26542	lncRNA	+
chr11	50236469	50238616	Ltc4s	lncRNA	-	XH	chr11	50236953	50288839	Gm26542	lncRNA	+
chr11	53476573	53480274	Sowaha	lncRNA	-	XT	chr11	53480166	53481097	Gm9945	lncRNA	+
chr11	53720794	53725106	Il5	protein_coding	+	XI	chr11	53723953	53724618	Gm12214	lncRNA	-
chr11	54199433	54199692	Gm12222	processed_pseudogene	+	XO	chr11	54177772	54213285	4933405E24Rik	lncRNA	-
chr11	54247271	54249667	Csf2	lncRNA	-	XH	chr11	54247600	54254495	Gm12223	lncRNA	+
chr11	54829711	54829880	Gm25426	snRNA	+	SD	chr11	54819919	54824967	Lyrm7os	lncRNA	+
chr11	55482694	55482833	Gm22884	snoRNA	+	SU	chr11	55482706	55482829	Gm12238	lncRNA	+
chr11	56024987	56041010	Nmur2	protein_coding	-	XO	chr11	55772088	56070848	Gm12239	lncRNA	+
chr11	57969342	57969612	Gm26025	misc_RNA	+	XH	chr11	57970244	57973134	Gm12249	lncRNA	-
chr11	58961812	58962222	Gm12260	unprocessed_pseudogene	+	XH	chr11	58965748	58978050	2310058D17Rik	lncRNA	-
chr11	59202486	59206134	Mrpl55	protein_coding	+	XT	chr11	59199836	59202385	2610507I01Rik	lncRNA	-
chr11	59372669	59375657	Prss38	lncRNA	-	XH	chr11	59375461	59379905	Gm15755	lncRNA	+
chr11	59813137	59813273	Gm24939	rRNA	+	SD	chr11	59810080	59818491	Gm16062	lncRNA	+
chr11	61416402	61416815	Gm12271	processed_pseudogene	-	XH	chr11	61408018	61412286	Gm45605	lncRNA	+
chr11	62551171	62553213	Ubb	protein_coding	+	XT	chr11	62550047	62551041	Gm12279	lncRNA	-
chr11	62603079	62603150	Snord49b	snoRNA	+	SD	chr11	62602877	62604807	2410006H16Rik	lncRNA	+
chr11	62603079	62603150	Snord49b	snoRNA	+	SU	chr11	62605766	62607748	Lrrc75aos2	lncRNA	+
chr11	62603450	62603521	Snord49a	snoRNA	+	SD	chr11	62602877	62604807	2410006H16Rik	lncRNA	+
chr11	62603450	62603521	Snord49a	snoRNA	+	SU	chr11	62605766	62607748	Lrrc75aos2	lncRNA	+
chr11	62604515	62604586	Snord65	snoRNA	+	SD	chr11	62602877	62604807	2410006H16Rik	lncRNA	+
chr11	62604515	62604586	Snord65	snoRNA	+	SU	chr11	62605766	62607748	Lrrc75aos2	lncRNA	+
chr11	62750064	62751280	Wsb2-ps	processed_pseudogene	-	XO	chr11	62749852	62752787	Gm27194	lncRNA	+
chr11	62753100	62753498	Gm10428	protein_coding	+	SD	chr11	62749852	62752787	Gm27194	lncRNA	+
chr11	62757178	62760558	Zfp286it	antisense	-	XH	chr11	62761236	62765554	Zfp286os	lncRNA	+
chr11	66911981	66929876	Pirt	protein_coding	+	XO	chr11	66905721	66947086	Gm12298	lncRNA	-
chr11	69059717	69061578	2310047M10Rik	lncRNA	+	XT	chr11	69057718	69060483	9330160F10Rik	lncRNA	-
chr11	69120404	69124055	Hes7	lncRNA	+	XH	chr11	69120054	69122589	9130213A22Rik	lncRNA	-
chr11	69326258	69333042	Kcnab3	protein_coding	+	XI	chr11	69329825	69332122	Kcnab3os	lncRNA	-
chr11	69396519	69398234	Tmem88	protein_coding	-	XT	chr11	69401513	69402700	Kdm6bos	lncRNA	+
chr11	69682577	69696098	Tnfsf12Tnfsf13	lncRNA	-	XH	chr11	69682138	69691141	Tnfsf13os	lncRNA	+
chr11	69682846	69685784	Tnfsf13	protein_coding	-	XO	chr11	69682138	69691141	Tnfsf13os	lncRNA	+
chr11	69686250	69695849	Tnfsf12	lncRNA	-	XH	chr11	69682138	69691141	Tnfsf13os	lncRNA	+
chr11	70615848	70616890	4930544D05Rik	protein_coding	+	XH	chr11	70611212	70613211	Gm12316	lncRNA	-
chr11	70651850	70654644	Pfn1	protein_coding	-	SU	chr11	70654741	70656493	Gm12319	lncRNA	-
chr11	75173388	75173478	Mir212	miRNA	+	SD	chr11	75172560	75177633	1700016P03Rik	lncRNA	+
chr11	75173665	75173765	Mir132	miRNA	+	SD	chr11	75172560	75177633	1700016P03Rik	lncRNA	+
chr11	75175942	75178835	Ovca2	lncRNA	-	XT	chr11	75172560	75177633	1700016P03Rik	lncRNA	+
chr11	75427753	75428152	Gm12337	processed_pseudogene	+	XH	chr11	75422731	75423340	Gm12336	lncRNA	-
chr11	75461715	75470899	Tlcd2	protein_coding	+	SD	chr11	75461539	75466676	Mir22hg	lncRNA	+
chr11	75463716	75463810	Mir22	miRNA	+	SD	chr11	75461539	75466676	Mir22hg	lncRNA	+
chr11	78290841	78296805	BC030499	protein_coding	+	XI	chr11	78292848	78293956	Gm3948	lncRNA	-
chr11	80154105	80178958	Adap2	protein_coding	+	XI	chr11	80158861	80177629	Adap2os	lncRNA	-
chr11	82951349	82962941	Slfn5	lncRNA	+	XT	chr11	82942341	82960681	Slfn5os	lncRNA	-
chr11	82971092	82971920	Gm11424	processed_pseudogene	+	XH	chr11	82974316	82975585	1190001M18Rik	lncRNA	-
chr11	83065112	83070678	Slfn2	lncRNA	+	XT	chr11	83065752	83071246	Gm20234	lncRNA	-
chr11	83294304	83294400	Snord7	snoRNA	+	SD	chr11	83291699	83294632	AA465934	lncRNA	+
chr11	83587882	83593087	Ccl6	protein_coding	-	XO	chr11	83582056	83623693	E230016K23Rik	lncRNA	+
chr11	83844665	83844972	Gm23211	misc_RNA	+	XO	chr11	83817682	83849493	Gm12576	lncRNA	-
chr11	85778812	85778927	Gm23473	rRNA	+	XH	chr11	85766831	85775680	Bcas3os2	lncRNA	-
chr11	86210681	86257575	Ints2	protein_coding	-	XO	chr11	86201370	86304443	Brip1os	lncRNA	+
chr11	87078787	87079257	Gm9378	processed_pseudogene	+	XH	chr11	87074257	87074958	Gm11479	lncRNA	-
chr11	87756841	87756955	Mir142b	miRNA	-	XO	chr11	87755577	87757270	Mir142hg	lncRNA	+
chr11	87793581	87804413	Mpo	protein_coding	+	XI	chr11	87795784	87801144	Gm11505	lncRNA	-
chr11	88039578	88047360	2010015M23Rik	lincRNA	-	SD	chr11	88011991	88048006	Gm11508	lncRNA	-
chr11	88352773	88352864	Mir378b	miRNA	+	SU	chr11	88356291	88363947	Gm15893	lncRNA	+
chr11	88905121	88905227	Gm23507	snRNA	+	SU	chr11	88905928	88936061	Scpep1os	lncRNA	+
chr11	89300638	89302332	Nog	protein_coding	-	XH	chr11	89302723	89309428	Gm2018	lncRNA	+
chr11	90185009	90185127	n-R5s72	rRNA	-	XH	chr11	90188108	90267581	Gm45883	lncRNA	+
chr11	90859767	90861348	Gm11516	processed_pseudogene	-	XO	chr11	90804692	90895149	4930405D11Rik	lncRNA	+
chr11	95140447	95146263	Dlx4	lncRNA	-	XH	chr11	95145052	95159047	Dlx4os	lncRNA	+
chr11	96248633	96249189	Gm11539	processed_pseudogene	+	SU	chr11	96251105	96264868	Gm53	lncRNA	+
chr11	96265164	96265265	Mir196a-1	miRNA	+	SD	chr11	96251105	96264868	Gm53	lncRNA	+
chr11	96286623	96290162	Hoxb7	protein_coding	+	XH	chr11	96291024	96306910	Hoxb5os	lncRNA	-
chr11	96292476	96301569	Hoxb6	protein_coding	+	XO	chr11	96291024	96306910	Hoxb5os	lncRNA	-
chr11	96303336	96306121	Hoxb5	protein_coding	+	XO	chr11	96291024	96306910	Hoxb5os	lncRNA	-
chr11	96350525	96354012	Hoxb2	protein_coding	+	XO	chr11	96343072	96354691	Hoxb3os	lncRNA	-
chr11	96870195	96871001	Gm11524	processed_pseudogene	+	XO	chr11	96862997	96873954	Gm11523	lncRNA	-
chr11	96928104	96937830	Prr15l	protein_coding	+	SD	chr11	96916270	96965060	D030028A08Rik	lncRNA	+
chr11	96937825	96943986	Pnpo	protein_coding	-	XO	chr11	96916270	96965060	D030028A08Rik	lncRNA	+
chr11	97660257	97660327	Gm24158	miRNA	-	SD	chr11	97644184	97660367	Gm11613	lncRNA	-
chr11	98026710	98030492	Rpl19	protein_coding	+	SD	chr11	98022955	98026745	Gm11629	lncRNA	+
chr11	98029413	98029492	Gm27597	miRNA	+	SD	chr11	98022955	98026745	Gm11629	lncRNA	+
chr11	98348404	98357796	Ppp1r1b	lncRNA	+	XT	chr11	98350718	98358283	1700003D09Rik	lncRNA	-
chr11	98437708	98438991	Mien1	lncRNA	-	XT	chr11	98438037	98439046	Gm12352	lncRNA	+
chr11	98795516	98807859	Msl1	lncRNA	+	XH	chr11	98797707	98810087	Gm12359	lncRNA	-
chr11	99385254	99389364	Krt10	protein_coding	-	XI	chr11	99387340	99387897	Gm11940	lncRNA	+
chr11	99415666	99422259	Krt12	lncRNA	-	XH	chr11	99416956	99425497	A830036E02Rik	lncRNA	+
chr11	100080848	100088226	Krt32	lncRNA	-	XT	chr11	100052286	100085983	Gm11571	lncRNA	+
chr11	100102007	100105626	Krt36	protein_coding	-	SU	chr11	100105771	100112106	Gm12347	lncRNA	-
chr11	102145513	102149477	Nags	protein_coding	+	XI	chr11	102145549	102146246	Gm11586	lncRNA	-
chr11	104251012	104251144	Gm22743	snoRNA	-	SD	chr11	104250902	104259361	Gm11659	lncRNA	-
chr11	104565400	104566726	Gm11661	transcribed_processed_pseudogene	-	SD	chr11	104557922	104565661	Gm22000	lncRNA	-
chr11	105967945	105989964	Ace	lncRNA	+	XH	chr11	105965608	105985694	Gm11651	lncRNA	-
chr11	106156256	106160860	Limd2	lncRNA	-	XT	chr11	106160193	106161158	Gm10840	lncRNA	+
chr11	107531931	107532305	Gm11649	transcribed_processed_pseudogene	-	SD	chr11	107531757	107548373	A830035A12Rik	lncRNA	-
chr11	107996848	107996916	Mir7223	miRNA	+	SD	chr11	107994022	107994631	Gm11657	lncRNA	+
chr11	115403752	115412674	Ict1	protein_coding	+	XI	chr11	115406586	115408314	Ict1os	lncRNA	-
chr11	116530925	116536674	Sphk1	lncRNA	+	XH	chr11	116529215	116533077	Gm29292	lncRNA	-
chr11	116671660	116675799	1810032O08Rik	protein_coding	+	SD	chr11	116671604	116685072	Snhg16	lncRNA	+
chr11	116672506	116672581	Snord1c	snoRNA	+	SD	chr11	116671604	116685072	Snhg16	lncRNA	+
chr11	116674148	116674222	Snord1b	snoRNA	+	SD	chr11	116671604	116685072	Snhg16	lncRNA	+
chr11	116674598	116674671	Snord1a	snoRNA	+	SD	chr11	116671604	116685072	Snhg16	lncRNA	+
chr11	117077243	117077435	Gm26083	snoRNA	+	SD	chr11	117076008	117078955	Snhg20	lncRNA	+
chr11	117867952	117873481	Tha1	lncRNA	-	XH	chr11	117871250	117887416	Gm11725	lncRNA	+
chr11	120345690	120348542	Actg1	protein_coding	-	XT	chr11	120348678	120351190	0610009L18Rik	lncRNA	+
chr11	120346736	120346819	Gm23419	miRNA	-	XH	chr11	120348678	120351190	0610009L18Rik	lncRNA	+
chr11	120347350	120347413	Mir6935	miRNA	-	XH	chr11	120348678	120351190	0610009L18Rik	lncRNA	+
chr11	120484613	120489065	Mrpl12	protein_coding	+	XT	chr11	120489406	120492394	Gm11788	lncRNA	-
chr11	120486339	120488582	Gm16755	lincRNA	-	SU	chr11	120489406	120492394	Gm11788	lncRNA	-
chr11	120578104	120581624	Arhgdia	protein_coding	-	XT	chr11	120581670	120582837	Gm3807	lncRNA	+
chr11	120646031	120648158	Myadml2	lncRNA	-	XH	chr11	120647670	120657061	Myadml2os	lncRNA	+
chr11	120653788	120661175	Notum	lncRNA	-	XT	chr11	120647670	120657061	Myadml2os	lncRNA	+
chr11	120710942	120713738	Stra13	protein_coding	-	SD	chr11	120689146	120709447	Gm17178	lncRNA	-
chr11	121030858	121030982	Gm22152	snoRNA	+	SD	chr11	121029402	121052357	Gm11775	lncRNA	+
chr11	121036747	121039418	Cd7	protein_coding	-	XO	chr11	121029402	121052357	Gm11775	lncRNA	+
chr11	121092392	121092559	Gm11792	processed_pseudogene	-	SU	chr11	121096641	121097207	Gm11791	lncRNA	-
chr11	121886542	121886968	Gm12587	processed_pseudogene	-	SD	chr11	121882333	121883863	Gm12590	lncRNA	-
chr12	3365132	3406494	Kif3c	protein_coding	+	XI	chr12	3367248	3404066	Gm48512	lncRNA	-
chr12	4592826	4592927	Gm3625	protein_coding	-	SU	chr12	4595340	4655888	Gm48678	lncRNA	-
chr12	5843712	5843826	Gm23752	rRNA	+	SD	chr12	5808195	5984958	Gm32442	lncRNA	+
chr12	7741553	7741622	Gm24815	miRNA	-	SD	chr12	7524002	7859766	Gm32828	lncRNA	-
chr12	7859827	7861205	Gm9144	pseudogene	+	XH	chr12	7524002	7859766	Gm32828	lncRNA	-
chr12	9429546	9430099	Gm7099	pseudogene	+	SD	chr12	9371438	9473770	Gm46323	lncRNA	+
chr12	11208382	11208948	Msgn1	protein_coding	-	SD	chr12	11185993	11204502	9530020I12Rik	lncRNA	-
chr12	12911986	12912369	Rpl36-ps3	protein_coding	+	SD	chr12	12909428	12913029	Gm40271	lncRNA	+
chr12	12911986	12912369	Rpl36-ps3	protein_coding	+	SD	chr12	12902720	12907378	4930519A11Rik	lncRNA	+
chr12	13490509	13490615	Gm24142	snRNA	-	SD	chr12	13484808	13487047	Gm48311	lncRNA	-
chr12	15020535	15020644	Gm27682	miRNA	-	SD	chr12	14996388	15051598	4930448C13Rik	lncRNA	-
chr12	18853872	18854207	Gm3944	protein_coding	+	SD	chr12	18853840	18906503	Gm40847	lncRNA	+
chr12	20804562	20804708	Gm28503	transcribed_processed_pseudogene	-	SD	chr12	20804381	20815779	1700030C10Rik	lncRNA	-
chr12	22622962	22623087	Gm17391	processed_pseudogene	-	SD	chr12	22585889	22623345	Gm40864	lncRNA	-
chr12	29035180	29035294	Gm23342	rRNA	-	XO	chr12	28910229	29041874	Gm31508	lncRNA	+
chr12	30457968	30458071	Gm25865	miRNA	-	SD	chr12	30410559	30467358	2310016D03Rik	lncRNA	-
chr12	33928425	33929310	Ferd3l	lncRNA	+	XT	chr12	33900358	33928456	Gm40383	lncRNA	-
chr12	40222712	40222811	Mir1938	lncRNA	-	XH	chr12	40222758	40229184	Gm7008	lncRNA	+
chr12	41348441	41348572	Gm25497	snoRNA	-	SD	chr12	41342820	41348090	Gm47376	lncRNA	-
chr12	45109007	45109137	Gm24731	snoRNA	+	SD	chr12	45094012	45162048	Gm48508	lncRNA	+
chr12	49382693	49386867	Foxg1	protein_coding	+	XH	chr12	49368729	49381885	Gm34304	lncRNA	-
chr12	49401277	49401837	Gm9804	protein_coding	+	SD	chr12	49389652	49407360	3110039M20Rik	lncRNA	+
chr12	52516077	52567852	Arhgap5	protein_coding	+	XO	chr12	52496326	52581409	Gm35188	lncRNA	-
chr12	52603788	52603894	Gm24859	snRNA	+	SU	chr12	52607670	52628812	Gm35239	lncRNA	+
chr12	52603788	52603894	Gm24859	snRNA	+	XH	chr12	52599981	52602322	1700031P21Rik	lncRNA	-
chr12	52604485	52604591	Gm23296	snRNA	-	SD	chr12	52599981	52602322	1700031P21Rik	lncRNA	-
chr12	52604485	52604591	Gm23296	snRNA	-	XH	chr12	52607670	52628812	Gm35239	lncRNA	+
chr12	54239238	54239386	Gm22220	snRNA	+	SD	chr12	54233615	54242320	1700104L18Rik	lncRNA	+
chr12	54240755	54240900	Gm24692	snRNA	-	XO	chr12	54233615	54242320	1700104L18Rik	lncRNA	+
chr12	54858817	54862877	Cfl2	lncRNA	-	XT	chr12	54862647	54863667	1700081N11Rik	lncRNA	+
chr12	55821063	55821153	Gm23394	miRNA	-	SD	chr12	55815184	55816527	Gm48655	lncRNA	-
chr12	56252315	56252444	Gm25917	snoRNA	-	SD	chr12	56246648	56254398	Gm47682	lncRNA	-
chr12	56252315	56252444	Gm25917	snoRNA	-	XH	chr12	56253243	56266384	Gm19990	lncRNA	+
chr12	56266920	56267204	Gm24685	misc_RNA	-	XH	chr12	56253243	56266384	Gm19990	lncRNA	+
chr12	56531958	56536908	Nkx2-1	lncRNA	-	XH	chr12	56535343	56607476	Gm26973	lncRNA	+
chr12	56551459	56551590	Gm25760	snoRNA	+	SD	chr12	56535343	56607476	Gm26973	lncRNA	+
chr12	56611389	56613284	Nkx2-9	protein_coding	-	SD	chr12	56609613	56610476	Gm38103	lncRNA	-
chr12	69141430	69142066	Gm15571	processed_pseudogene	-	XO	chr12	69129836	69145076	Gm31447	lncRNA	+
chr12	69372150	69375979	Arf6	lncRNA	+	XH	chr12	69370484	69372468	Gm9887	lncRNA	-
chr12	70673646	70673746	Gm24474	snRNA	+	XH	chr12	70675847	70681850	Gm32369	lncRNA	-
chr12	72950895	72951710	RP23-113F14.3	TEC	+	SD	chr12	72945807	72965931	Gm26709	lncRNA	+
chr12	73901375	73947530	Hif1a	protein_coding	+	XO	chr12	73843039	73949814	Gm15283	lncRNA	-
chr12	74315110	74316394	Gm11042	protein_coding	-	SD	chr12	74314201	74317162	Gm34552	lncRNA	-
chr12	76404176	76406934	Hspa2	protein_coding	+	XT	chr12	76402751	76403982	4930426I24Rik	lncRNA	-
chr12	79107958	79108062	Gm27297	snRNA	-	SD	chr12	79088705	79103939	9230116L04Rik	lncRNA	-
chr12	80391613	80391751	Scarna3b	snoRNA	-	SU	chr12	80391614	80391737	Gm50278	lncRNA	-
chr12	80754046	80760541	Ccdc177	lncRNA	-	XT	chr12	80758406	80762793	Gm26796	lncRNA	+
chr12	80945504	80950507	Srsf5	protein_coding	+	SD	chr12	80923432	80924449	1700052I22Rik	lncRNA	+
chr12	81501240	81501360	Gm24853	snoRNA	+	SD	chr12	81492199	81497015	Gm28370	lncRNA	+
chr12	81589435	81589870	Gm16570	lncRNA	-	XT	chr12	81587799	81589640	Gm16572	lncRNA	+
chr12	83950608	83952953	2410016O06Rik	lncRNA	+	XT	chr12	83945209	83951355	Gm26571	lncRNA	-
chr12	84038379	84044723	Acot4	lncRNA	+	XH	chr12	84039469	84053807	4732463B04Rik	lncRNA	-
chr12	87437682	87437817	Mir3068	snoRNA	-	SU	chr12	87437684	87437816	Gm29362	lncRNA	-
chr12	90801619	90801735	n-R5s65	rRNA	+	SD	chr12	90738201	90869235	Gm26512	lncRNA	+
chr12	90801619	90801735	n-R5s65	rRNA	+	XO	chr12	90753208	90969798	4930544I03Rik	lncRNA	-
chr12	90815197	90815325	Gm23195	snoRNA	+	SD	chr12	90738201	90869235	Gm26512	lncRNA	+
chr12	90815197	90815325	Gm23195	snoRNA	+	XO	chr12	90753208	90969798	4930544I03Rik	lncRNA	-
chr12	99047230	99047577	Rpl30-ps8	processed_pseudogene	+	XO	chr12	99033500	99063458	Gm47116	lncRNA	-
chr12	100863969	100864439	Gm8482	processed_pseudogene	-	XO	chr12	100862786	100864689	Gm48771	lncRNA	+
chr12	102684928	102685020	Mir1936	miRNA	-	SD	chr12	102673017	102727333	Gm28373	lncRNA	-
chr12	103310975	103317065	Fam181a	protein_coding	+	XI	chr12	103312367	103314769	Gm29508	lncRNA	-
chr12	104471209	104473330	Gsc	protein_coding	-	XH	chr12	104473331	104477759	Gm10000	lncRNA	+
chr12	105031075	105031349	Scarna13	snoRNA	-	SD	chr12	105030617	105032279	Snhg10	lncRNA	-
chr12	105031075	105031349	Scarna13	snoRNA	-	XH	chr12	105021359	105029936	Gm47648	lncRNA	+
chr12	105865724	105865793	Gm22120	miRNA	-	XO	chr12	105864262	105874745	Gm48807	lncRNA	+
chr12	109541168	109541250	Gm27596	misc_RNA	+	SD	chr12	109541001	109571726	Meg3	lncRNA	+
chr12	109544339	109544435	Gm27300	misc_RNA	+	SD	chr12	109541001	109571726	Meg3	lncRNA	+
chr12	109544541	109544620	Mir1906-1	miRNA	+	SD	chr12	109541001	109571726	Meg3	lncRNA	+
chr12	109563692	109563785	Mir770	miRNA	+	SD	chr12	109541001	109571726	Meg3	lncRNA	+
chr12	109568628	109571723	Gm26906	lincRNA	-	XO	chr12	109541001	109571726	Meg3	lncRNA	+
chr12	109571990	109572080	Mir673	miRNA	+	SD	chr12	109541001	109571726	Meg3	lncRNA	+
chr12	109603882	109603979	Gm27350	misc_RNA	+	SD	chr12	109603808	109661716	Rian	lncRNA	+
chr12	109611500	109611595	Mir341	miRNA	+	SD	chr12	109603808	109661716	Rian	lncRNA	+
chr12	109611822	109611941	Mir1188	miRNA	+	SD	chr12	109603808	109661716	Rian	lncRNA	+
chr12	109618114	109618200	Gm23912	miRNA	+	SD	chr12	109603808	109661716	Rian	lncRNA	+
chr12	109618258	109618336	Mir370	miRNA	+	SD	chr12	109603808	109661716	Rian	lncRNA	+
chr12	109631074	109631148	Gm24564	snoRNA	+	SD	chr12	109603808	109661716	Rian	lncRNA	+
chr12	109633768	109633842	Gm23474	snoRNA	+	SD	chr12	109603808	109661716	Rian	lncRNA	+
chr12	109636012	109636084	AF357425	snoRNA	+	SD	chr12	109603808	109661716	Rian	lncRNA	+
chr12	109640341	109642351	Gm26945	lincRNA	+	SD	chr12	109603808	109661716	Rian	lncRNA	+
chr12	109641022	109641094	Gm24899	snoRNA	+	SD	chr12	109603808	109661716	Rian	lncRNA	+
chr12	109643748	109643818	Gm23600	snoRNA	+	SD	chr12	109603808	109661716	Rian	lncRNA	+
chr12	109646129	109646202	Gm24895	snoRNA	+	SD	chr12	109603808	109661716	Rian	lncRNA	+
chr12	109649617	109649688	DQ267100	snoRNA	+	SD	chr12	109603808	109661716	Rian	lncRNA	+
chr12	109651424	109651496	DQ267101	snoRNA	+	SD	chr12	109603808	109661716	Rian	lncRNA	+
chr12	109653033	109653104	Gm23508	snoRNA	+	SD	chr12	109603808	109661716	Rian	lncRNA	+
chr12	109654627	109654698	AF357355	snoRNA	+	SD	chr12	109603808	109661716	Rian	lncRNA	+
chr12	109656345	109656416	DQ267102	snoRNA	+	SD	chr12	109603808	109661716	Rian	lncRNA	+
chr12	109657125	109657196	Gm25357	snoRNA	+	SD	chr12	109603808	109661716	Rian	lncRNA	+
chr12	109658407	109658478	Gm27604	snoRNA	+	SD	chr12	109603808	109661716	Rian	lncRNA	+
chr12	109673913	109673994	Gm23347	snoRNA	+	SD	chr12	109668869	109677585	Gm37899	lncRNA	+
chr12	109673913	109673994	Gm23347	snoRNA	+	SU	chr12	109676277	109714555	B830012L14Rik	lncRNA	+
chr12	109679945	109680013	AF357428	snoRNA	+	SD	chr12	109676277	109714555	B830012L14Rik	lncRNA	+
chr12	109679945	109680013	AF357428	snoRNA	+	SD	chr12	109668869	109677585	Gm37899	lncRNA	+
chr12	109680800	109680874	Gm23736	snoRNA	+	SD	chr12	109676277	109714555	B830012L14Rik	lncRNA	+
chr12	109680800	109680874	Gm23736	snoRNA	+	SD	chr12	109668869	109677585	Gm37899	lncRNA	+
chr12	109681519	109681593	AF357341	snoRNA	+	SD	chr12	109676277	109714555	B830012L14Rik	lncRNA	+
chr12	109681519	109681593	AF357341	snoRNA	+	SD	chr12	109668869	109677585	Gm37899	lncRNA	+
chr12	109682197	109682273	Mir882	miRNA	+	SD	chr12	109676277	109714555	B830012L14Rik	lncRNA	+
chr12	109682197	109682273	Mir882	miRNA	+	SD	chr12	109668869	109677585	Gm37899	lncRNA	+
chr12	109682384	109682458	Gm22981	snoRNA	+	SD	chr12	109676277	109714555	B830012L14Rik	lncRNA	+
chr12	109682384	109682458	Gm22981	snoRNA	+	SD	chr12	109668869	109677585	Gm37899	lncRNA	+
chr12	109682994	109683068	Gm25856	snoRNA	+	SD	chr12	109676277	109714555	B830012L14Rik	lncRNA	+
chr12	109684962	109685034	Gm23787	snoRNA	+	SD	chr12	109676277	109714555	B830012L14Rik	lncRNA	+
chr12	109686798	109686869	Gm25854	snoRNA	+	SD	chr12	109676277	109714555	B830012L14Rik	lncRNA	+
chr12	109688055	109688125	Gm22205	snoRNA	+	SD	chr12	109676277	109714555	B830012L14Rik	lncRNA	+
chr12	109689477	109689544	Gm25224	snoRNA	+	SD	chr12	109676277	109714555	B830012L14Rik	lncRNA	+
chr12	109709056	109709135	Mir379	miRNA	+	SD	chr12	109676277	109714555	B830012L14Rik	lncRNA	+
chr12	109710175	109710270	Mir411	miRNA	+	SD	chr12	109676277	109714555	B830012L14Rik	lncRNA	+
chr12	109710609	109710725	Mir299b	miRNA	-	XO	chr12	109676277	109714555	B830012L14Rik	lncRNA	+
chr12	109711779	109711890	Gm25750	miRNA	-	XO	chr12	109676277	109714555	B830012L14Rik	lncRNA	+
chr12	109712317	109712436	Mir1197	miRNA	+	SD	chr12	109676277	109714555	B830012L14Rik	lncRNA	+
chr12	109712508	109712593	Mir323	miRNA	+	SD	chr12	109676277	109714555	B830012L14Rik	lncRNA	+
chr12	109712810	109712890	Mir758	miRNA	+	SD	chr12	109676277	109714555	B830012L14Rik	lncRNA	+
chr12	109713481	109713577	Mir329	miRNA	+	SD	chr12	109676277	109714555	B830012L14Rik	lncRNA	+
chr12	109715318	109715402	Mir494	miRNA	+	SD	chr12	109676277	109714555	B830012L14Rik	lncRNA	+
chr12	109715577	109715650	Mir679	miRNA	+	SD	chr12	109676277	109714555	B830012L14Rik	lncRNA	+
chr12	109715671	109715791	Mir1193	miRNA	+	SD	chr12	109676277	109714555	B830012L14Rik	lncRNA	+
chr12	109717085	109717183	Mir666	miRNA	+	SD	chr12	109676277	109714555	B830012L14Rik	lncRNA	+
chr12	109717256	109717335	Mir543	miRNA	+	SD	chr12	109676277	109714555	B830012L14Rik	lncRNA	+
chr12	109718747	109718826	Mir495	miRNA	+	SD	chr12	109676277	109714555	B830012L14Rik	lncRNA	+
chr12	109726812	109726901	Mir381	miRNA	+	SU	chr12	109729764	109749460	Mirg	lncRNA	+
chr12	109727333	109727414	Mir487b	miRNA	+	SU	chr12	109729764	109749460	Mirg	lncRNA	+
chr12	109728129	109728202	Mir539	miRNA	+	SU	chr12	109729764	109749460	Mirg	lncRNA	+
chr12	109728821	109728943	Gm27379	miRNA	+	SU	chr12	109729764	109749460	Mirg	lncRNA	+
chr12	109729325	109729402	Mir544	miRNA	+	SU	chr12	109729764	109749460	Mirg	lncRNA	+
chr12	109733772	109733851	Mir382	miRNA	+	SD	chr12	109729764	109749460	Mirg	lncRNA	+
chr12	109734123	109734224	Mir134	miRNA	+	SD	chr12	109729764	109749460	Mirg	lncRNA	+
chr12	109734708	109734813	Mir668	miRNA	+	SD	chr12	109729764	109749460	Mirg	lncRNA	+
chr12	109734899	109734977	Mir485	miRNA	+	SD	chr12	109729764	109749460	Mirg	lncRNA	+
chr12	109735619	109735700	Mir453	miRNA	+	SD	chr12	109729764	109749460	Mirg	lncRNA	+
chr12	109738424	109738507	Mir154	miRNA	+	SD	chr12	109729764	109749460	Mirg	lncRNA	+
chr12	109739119	109739197	Mir496a	miRNA	+	SD	chr12	109729764	109749460	Mirg	lncRNA	+
chr12	109740510	109740577	Mir377	miRNA	+	SD	chr12	109729764	109749460	Mirg	lncRNA	+
chr12	109742409	109742498	Mir541	miRNA	+	SD	chr12	109729764	109749460	Mirg	lncRNA	+
chr12	109743158	109743237	Gm24321	miRNA	-	XO	chr12	109729764	109749460	Mirg	lncRNA	+
chr12	109743289	109743368	Mir412	miRNA	+	SD	chr12	109729764	109749460	Mirg	lncRNA	+
chr12	109743418	109743496	Mir369	miRNA	+	SD	chr12	109729764	109749460	Mirg	lncRNA	+
chr12	109743715	109743795	Mir410	miRNA	+	SD	chr12	109729764	109749460	Mirg	lncRNA	+
chr12	109747878	109747960	Mir3072	miRNA	+	SD	chr12	109729764	109749460	Mirg	lncRNA	+
chr12	110278048	110278129	Mir1247	miRNA	-	SD	chr12	110275385	110278172	Dio3os	lncRNA	-
chr12	110279068	110281097	Dio3	protein_coding	+	XH	chr12	110275385	110278172	Dio3os	lncRNA	-
chr12	111484611	111485823	Gm266	protein_coding	-	SD	chr12	111450405	111500840	Gm40578	lncRNA	-
chr12	115258136	115258432	Ighv8-7	IG_V_pseudogene	-	XH	chr12	115262684	115287908	Gm30948	lncRNA	+
chr12	115268424	115268856	Ighv1-57	IG_V_pseudogene	-	XO	chr12	115262684	115287908	Gm30948	lncRNA	+
chr12	115386697	115387128	Ighv1-62-1	lncRNA	-	XH	chr12	115386846	115397688	Gm19331	lncRNA	+
chr12	116275386	116275612	Gm11027	protein_coding	+	XH	chr12	116279682	116280231	Gm48079	lncRNA	-
chr12	117250817	117250885	Mir153	miRNA	+	XO	chr12	117234521	117337022	Gm5441	lncRNA	-
chr13	3121132	3122980	Gm17177	unprocessed_pseudogene	+	XH	chr13	3116916	3119562	Gm46400	lncRNA	-
chr13	3361029	3361533	Gm16505	protein_coding	+	XH	chr13	3325296	3358455	Gm48530	lncRNA	-
chr13	3837757	3838671	Calm4	protein_coding	+	SD	chr13	3825519	3843909	Gm40655	lncRNA	+
chr13	5997455	5997551	Gm26259	miRNA	-	XO	chr13	5915793	6014285	Gm46401	lncRNA	+
chr13	8289850	8290113	Gm10357	processed_pseudogene	-	XH	chr13	8282248	8286103	Gm48261	lncRNA	+
chr13	10592484	10592566	Gm23415	miRNA	-	XO	chr13	10357595	10797502	Gm26861	lncRNA	+
chr13	17986640	17993351	Yae1d1	protein_coding	-	SD	chr13	17961150	17992533	Gm48778	lncRNA	-
chr13	19178042	19178492	Tcrg-V7	IG_LV_gene	+	XO	chr13	19162036	19193558	Gm31887	lncRNA	-
chr13	19184981	19185501	Tcrg-V4	IG_LV_gene	+	XO	chr13	19162036	19193558	Gm31887	lncRNA	-
chr13	19190368	19190929	Tcrg-V6	IG_LV_gene	+	XO	chr13	19162036	19193558	Gm31887	lncRNA	-
chr13	19192433	19192725	Tcrg-V5	IG_LV_gene	+	XO	chr13	19162036	19193558	Gm31887	lncRNA	-
chr13	21445160	21445240	Mir1896	miRNA	+	SD	chr13	21440471	21445934	4930470G03Rik	lncRNA	+
chr13	21478907	21485507	Zkscan4	lncRNA	+	XT	chr13	21477615	21485049	Gm40828	lncRNA	-
chr13	21479097	21479441	Gm10065	protein_coding	-	SD	chr13	21477615	21485049	Gm40828	lncRNA	-
chr13	21486338	21486401	Gm23779	snRNA	-	SD	chr13	21477615	21485049	Gm40828	lncRNA	-
chr13	22016690	22018249	Gm11291	processed_transcript	+	SD	chr13	22014468	22020738	Gm11290	lncRNA	+
chr13	22035164	22035568	Hist1h2ah	protein_coding	-	XH	chr13	22026699	22032196	Gm11292	lncRNA	+
chr13	22035870	22036345	Hist1h2bk	protein_coding	+	SD	chr13	22026699	22032196	Gm11292	lncRNA	+
chr13	22524051	22524986	Vmn1r203	lncRNA	+	XH	chr13	22523911	22524744	Gm11300	lncRNA	-
chr13	22690970	22691966	Vmn1r-ps111	lncRNA	-	XH	chr13	22691299	22714987	Gm11309	lncRNA	+
chr13	22772327	22773325	Vmn1r208	lncRNA	-	XT	chr13	22772656	22773471	Gm11314	lncRNA	+
chr13	23298049	23298196	Gm11333	processed_pseudogene	+	XO	chr13	23276204	23313400	4930557F10Rik	lncRNA	-
chr13	23353103	23369208	Zfp322a	protein_coding	-	XO	chr13	23313525	23385799	4930586N03Rik	lncRNA	+
chr13	23382505	23382660	Gm11334	processed_pseudogene	+	SD	chr13	23313525	23385799	4930586N03Rik	lncRNA	+
chr13	23531050	23531522	Hist1h4h	protein_coding	+	XH	chr13	23527011	23530943	Gm11335	lncRNA	-
chr13	23533906	23534304	Hist1h2af	protein_coding	+	XH	chr13	23527011	23530943	Gm11335	lncRNA	-
chr13	23535434	23535860	Hist1h3g	protein_coding	+	XH	chr13	23527011	23530943	Gm11335	lncRNA	-
chr13	23751126	23751598	Hist1h2ab	protein_coding	+	XH	chr13	23755822	23757620	4930558J22Rik	lncRNA	-
chr13	23752267	23752886	Hist1h3b	protein_coding	+	XH	chr13	23755822	23757620	4930558J22Rik	lncRNA	-
chr13	23757013	23757409	Hist1h4b	protein_coding	+	XO	chr13	23755822	23757620	4930558J22Rik	lncRNA	-
chr13	23760692	23761230	Hist1h4a	protein_coding	-	SD	chr13	23755822	23757620	4930558J22Rik	lncRNA	-
chr13	23761853	23762386	Hist1h3a	protein_coding	-	SD	chr13	23755822	23757620	4930558J22Rik	lncRNA	-
chr13	24366776	24375950	Gm11345	lincRNA	-	SD	chr13	24335937	24414803	Gm11342	lncRNA	-
chr13	24410106	24410440	Gm11344	processed_pseudogene	-	SD	chr13	24335937	24414803	Gm11342	lncRNA	-
chr13	26768173	26770119	Hdgfl1	lncRNA	-	XH	chr13	26769393	26772727	4921520N01Rik	lncRNA	+
chr13	27306712	27307052	Gm11356	processed_pseudogene	+	SD	chr13	27292616	27306032	4930511O05Rik	lncRNA	+
chr13	28510744	28511232	Gm6081	processed_pseudogene	-	SD	chr13	28460034	28885620	2610307P16Rik	lncRNA	-
chr13	28710781	28710873	Mir6368	miRNA	-	SD	chr13	28460034	28885620	2610307P16Rik	lncRNA	-
chr13	28827123	28827362	Gm17528	pseudogene	+	XO	chr13	28460034	28885620	2610307P16Rik	lncRNA	-
chr13	28836875	28837724	Gm11362	processed_pseudogene	+	XO	chr13	28460034	28885620	2610307P16Rik	lncRNA	-
chr13	31352980	31353094	Gm22330	snoRNA	+	XO	chr13	31349901	31408922	G630018N14Rik	lncRNA	-
chr13	31626446	31626543	Gm27516	miRNA	-	SD	chr13	31565492	31625792	1700018A04Rik	lncRNA	-
chr13	33567794	33568005	Gm25043	misc_RNA	+	SU	chr13	33569021	33572086	Gm47916	lncRNA	+
chr13	33567794	33568005	Gm25043	misc_RNA	+	XO	chr13	33562486	33569317	Gm6093	lncRNA	-
chr13	35662135	35662276	Gm22126	snRNA	+	XH	chr13	35603030	35660777	Gm48707	lncRNA	-
chr13	36654405	36654536	Gm26395	snoRNA	+	SD	chr13	36612816	36653073	Gm46409	lncRNA	+
chr13	37513994	37514334	RP23-21N15.1	TEC	-	XH	chr13	37508940	37512074	Gm29590	lncRNA	+
chr13	38898360	38898587	Gm22035	misc_RNA	-	XO	chr13	38710054	38908255	Gm46392	lncRNA	+
chr13	41901651	41901754	Gm22157	snRNA	+	SD	chr13	41865915	41913092	Gm10790	lncRNA	+
chr13	42301270	42307989	Edn1	protein_coding	+	XI	chr13	42302298	42304991	Gm47118	lncRNA	-
chr13	43872802	43872909	Gm23117	snRNA	+	SD	chr13	43864669	43868589	Gm33195	lncRNA	+
chr13	44438834	44439813	Gm27036	lncRNA	-	XH	chr13	44439712	44469030	1700029N11Rik	lncRNA	+
chr13	44438834	44439813	Gm27036	processed_pseudogene	-	SD	chr13	44400436	44455303	Gm27007	lncRNA	-
chr13	45078498	45079127	Hsp25-ps1	lncRNA	-	XH	chr13	45078692	45081222	Gm9817	lncRNA	+
chr13	45294654	45294996	Gm23755	misc_RNA	-	XO	chr13	45235635	45335588	Gm47448	lncRNA	+
chr13	46980720	46980848	Gm24769	snoRNA	+	SD	chr13	46979908	47011195	2010001K21Rik	lncRNA	+
chr13	47012558	47014850	Nhlrc1	protein_coding	-	XH	chr13	46979908	47011195	2010001K21Rik	lncRNA	+
chr13	48261427	48264036	Id4	lncRNA	+	XT	chr13	48239054	48262591	Gm49291	lncRNA	-
chr13	48261427	48264036	Id4	lncRNA	+	XT	chr13	48044231	48262623	A330033J07Rik	lncRNA	-
chr13	48536012	48536114	Mirlet7d	miRNA	-	SD	chr13	48532905	48546500	6720427I07Rik	lncRNA	-
chr13	48537825	48537921	Gm24111	miRNA	+	XH	chr13	48542644	48545033	Gm37238	lncRNA	-
chr13	48537825	48537921	Gm24111	miRNA	+	XO	chr13	48532905	48546500	6720427I07Rik	lncRNA	-
chr13	48538171	48538270	Mirlet7a-1	miRNA	-	SD	chr13	48532905	48546500	6720427I07Rik	lncRNA	-
chr13	48538171	48538270	Mirlet7a-1	miRNA	-	SU	chr13	48542644	48545033	Gm37238	lncRNA	-
chr13	50417864	50433780	Fbxw17	protein_coding	+	XO	chr13	50343583	50491741	Gm8739	lncRNA	-
chr13	50467307	50475355	Gm806	protein_coding	+	XO	chr13	50343583	50491741	Gm8739	lncRNA	-
chr13	51408618	51422797	S1pr3	lncRNA	+	XT	chr13	51378136	51418686	Gm32834	lncRNA	-
chr13	53525703	53526059	Gm5449	protein_coding	+	XO	chr13	53503606	53533257	Gm34022	lncRNA	-
chr13	55825051	55836192	Pitx1	lncRNA	-	XH	chr13	55826250	56084849	Gm47071	lncRNA	+
chr13	59725925	59731752	Spata31d1d	lncRNA	-	XH	chr13	59726724	59750140	Gm46419	lncRNA	+
chr13	59740842	59746752	1700014D04Rik	protein_coding	-	XO	chr13	59726724	59750140	Gm46419	lncRNA	+
chr13	60174405	60177365	Gas1	lncRNA	-	XH	chr13	60176682	60182862	Gm48488	lncRNA	+
chr13	62006666	62006941	Gm20563	processed_pseudogene	+	XO	chr13	62006640	62126102	Gm48228	lncRNA	-
chr13	62013035	62013144	Gm25649	miRNA	-	SD	chr13	62006640	62126102	Gm48228	lncRNA	-
chr13	62035420	62036163	Gm6478	processed_pseudogene	+	XO	chr13	62006640	62126102	Gm48228	lncRNA	-
chr13	64296437	64296524	Gm25654	snRNA	-	XO	chr13	64291077	64298039	Gm47003	lncRNA	+
chr13	64481246	64497792	1190003K10Rik	protein_coding	-	XO	chr13	64449437	64508611	Gm31218	lncRNA	+
chr13	64509723	64511099	Gm4810	processed_pseudogene	+	SD	chr13	64449437	64508611	Gm31218	lncRNA	+
chr13	65512678	65512848	Gm10139	protein_coding	+	SD	chr13	65493490	65630774	Gm48166	lncRNA	+
chr13	65559166	65559714	Gm6901	processed_pseudogene	+	SD	chr13	65493490	65630774	Gm48166	lncRNA	+
chr13	66119547	66122836	Gm10324	protein_coding	+	XO	chr13	66119040	66129693	Gm50489	lncRNA	-
chr13	66349396	66365772	Gm26715	lincRNA	+	SD	chr13	66244270	66451277	Gm26754	lncRNA	+
chr13	66352469	66355385	Vmn2r-ps104	protein_coding	-	XO	chr13	66244270	66451277	Gm26754	lncRNA	+
chr13	66418114	66441118	2410141K09Rik	protein_coding	-	XO	chr13	66244270	66451277	Gm26754	lncRNA	+
chr13	67069398	67081545	Zfp708	protein_coding	-	XO	chr13	67060505	67092042	Gm46440	lncRNA	+
chr13	67389309	67399767	Zfp429	lncRNA	-	XH	chr13	67390475	67408858	Gm48900	lncRNA	+
chr13	67660457	67661445	Gm26587	processed_pseudogene	+	SD	chr13	67658669	67667943	Gm48095	lncRNA	+
chr13	67747800	67755228	Zfp85	protein_coding	-	XO	chr13	67729262	67756838	Zfp85os	lncRNA	+
chr13	67810246	67811200	Gm9625	processed_pseudogene	+	XO	chr13	67796594	67830985	4930525G20Rik	lncRNA	-
chr13	67813740	67827002	Zfp273	protein_coding	+	XO	chr13	67796594	67830985	4930525G20Rik	lncRNA	-
chr13	70007204	70007614	Gm6132	processed_pseudogene	-	SD	chr13	70004050	70028348	1700084F23Rik	lncRNA	-
chr13	70168832	70168959	Gm26018	snoRNA	+	SD	chr13	70149800	70205972	AU017674	lncRNA	+
chr13	74406396	74407317	Gm10116	lncRNA	+	XT	chr13	74404183	74406737	Gm47428	lncRNA	-
chr13	74407065	74407173	Mir692-3	miRNA	+	XH	chr13	74404183	74406737	Gm47428	lncRNA	-
chr13	78372987	78379134	Gm6317	lncRNA	-	XH	chr13	78374179	78384198	Gm48399	lncRNA	+
chr13	81064684	81065803	Gm8399	pseudogene	+	SD	chr13	80962888	81128864	9330111N05Rik	lncRNA	+
chr13	81065477	81065560	Gm25241	miRNA	+	SD	chr13	80962888	81128864	9330111N05Rik	lncRNA	+
chr13	83738806	83738892	Mir9-2	miRNA	+	SD	chr13	83721381	83884194	C130071C03Rik	lncRNA	+
chr13	83738806	83738892	Mir9-2	miRNA	+	XH	chr13	83734709	83738535	Gm33366	lncRNA	-
chr13	86044816	86046904	Cox7c	protein_coding	-	SU	chr13	86044989	86045048	Gm22574	lncRNA	-
chr13	91723256	91723383	Gm22778	snoRNA	+	XO	chr13	91701665	91741872	4833422C13Rik	lncRNA	-
chr13	91744705	91745004	Gm24597	misc_RNA	-	SD	chr13	91701665	91741872	4833422C13Rik	lncRNA	-
chr13	97458149	97459077	Gm8756	processed_pseudogene	-	XO	chr13	97434970	97497007	Lncenc1	lncRNA	+
chr13	97760130	97760588	Gm10260	protein_coding	-	XO	chr13	97751112	97760965	0	lncRNA	+
chr13	100946405	100946815	Gm10257	processed_pseudogene	-	XO	chr13	100847433	100977915	Gm29502	lncRNA	+
chr13	103641926	103642032	Gm24870	snRNA	+	XO	chr13	103591395	103707633	Gm30551	lncRNA	-
chr13	111361203	111361675	Gm15285	processed_pseudogene	-	SU	chr13	111361840	111368680	Gm6270	lncRNA	-
chr13	111361676	111361919	Gm15289	lncRNA	+	XH	chr13	111361840	111368680	Gm6270	lncRNA	-
chr13	111592785	111592856	Gm10198	protein_coding	+	SD	chr13	111580261	111644830	Gm15286	lncRNA	+
chr13	111593534	111593611	Gm10736	processed_pseudogene	-	XO	chr13	111580261	111644830	Gm15286	lncRNA	+
chr13	111721479	111724334	Gm15488	unitary_pseudogene	-	XH	chr13	111725517	111735124	Gm15287	lncRNA	+
chr13	113035983	113036091	Mir449c	miRNA	+	XH	chr13	113039301	113042243	Gm10735	lncRNA	-
chr13	113037419	113037498	Mir449b	miRNA	+	XH	chr13	113039301	113042243	Gm10735	lncRNA	-
chr13	113037534	113037624	Mir449a	miRNA	+	XH	chr13	113039301	113042243	Gm10735	lncRNA	-
chr13	113042763	113046388	Gpx8	protein_coding	-	SD	chr13	113039301	113042243	Gm10735	lncRNA	-
chr13	115088357	115090188	Pelo	lncRNA	-	XT	chr13	115089501	115090987	Gm10734	lncRNA	+
chr13	116675878	116675968	Gm23198	rRNA	+	XO	chr13	116558311	116677705	Gm47914	lncRNA	-
chr13	119606650	119610458	Gm21967	lncRNA	+	XT	chr13	119609765	119613472	Gm48265	lncRNA	-
chr13	120017108	120017213	Gm22108	snRNA	-	XO	chr13	120010390	120018931	Gm36161	lncRNA	+
chr14	3188255	3196681	Gm5795	protein_coding	+	XO	chr14	3186101	3262317	Gm17188	lncRNA	-
chr14	3210975	3211821	Gm17222	processed_pseudogene	-	SD	chr14	3186101	3262317	Gm17188	lncRNA	-
chr14	3224440	3234351	D830030K20Rik	protein_coding	+	XO	chr14	3186101	3262317	Gm17188	lncRNA	-
chr14	3254679	3255873	Gm4904	processed_pseudogene	-	SD	chr14	3186101	3262317	Gm17188	lncRNA	-
chr14	3838995	3839336	Gm26570	processed_pseudogene	-	SD	chr14	3822531	3884087	Gm26886	lncRNA	-
chr14	3846245	3856085	Gm3033	protein_coding	+	XO	chr14	3822531	3884087	Gm26886	lncRNA	-
chr14	3876445	3877636	Gm2907	processed_pseudogene	-	SD	chr14	3822531	3884087	Gm26886	lncRNA	-
chr14	4555405	4562747	Gm3047	protein_coding	+	XO	chr14	4551493	4585439	Gm26655	lncRNA	-
chr14	4577811	4579002	Gm8164	processed_pseudogene	-	SD	chr14	4551493	4585439	Gm26655	lncRNA	-
chr14	4892416	4902431	Gm3278	protein_coding	+	XO	chr14	4867977	4930414	Gm26650	lncRNA	-
chr14	4922785	4923979	Gm8305	processed_pseudogene	-	SD	chr14	4867977	4930414	Gm26650	lncRNA	-
chr14	5164535	5169233	Gm3317	protein_coding	+	XO	chr14	5161446	5221712	Gm26552	lncRNA	-
chr14	5178549	5179029	Gm3140	processed_pseudogene	-	SD	chr14	5161446	5221712	Gm26552	lncRNA	-
chr14	5185793	5193743	Gm8271	protein_coding	+	XO	chr14	5161446	5221712	Gm26552	lncRNA	-
chr14	5214084	5215126	Gm3326	processed_pseudogene	-	SD	chr14	5161446	5221712	Gm26552	lncRNA	-
chr14	5531178	5531664	Gm26746	processed_pseudogene	-	SD	chr14	5514087	5574342	Gm26893	lncRNA	-
chr14	5538496	5546373	Gm3532	protein_coding	+	XO	chr14	5514087	5574342	Gm26893	lncRNA	-
chr14	5566713	5567904	Gm8266	processed_pseudogene	-	SD	chr14	5514087	5574342	Gm26893	lncRNA	-
chr14	6358497	6359687	Gm8340	processed_pseudogene	+	SD	chr14	6352044	6446960	Gm26630	lncRNA	+
chr14	6380721	6390319	Gm16440	protein_coding	-	XO	chr14	6352044	6446960	Gm26630	lncRNA	+
chr14	6405827	6412482	Gm3591	protein_coding	-	XO	chr14	6352044	6446960	Gm26630	lncRNA	+
chr14	6435796	6444611	Gm3594	protein_coding	-	XO	chr14	6352044	6446960	Gm26630	lncRNA	+
chr14	6690690	6691881	Gm3466	processed_pseudogene	+	SD	chr14	6684255	6783942	Gm26680	lncRNA	+
chr14	6712183	6720251	Gm8050	protein_coding	-	XO	chr14	6684255	6783942	Gm26680	lncRNA	+
chr14	6735685	6742332	Gm3636	protein_coding	-	XO	chr14	6684255	6783942	Gm26680	lncRNA	+
chr14	6765962	6774411	Gm8362	protein_coding	-	XO	chr14	6684255	6783942	Gm26680	lncRNA	+
chr14	7418908	7420099	Gm8379	processed_pseudogene	+	SD	chr14	7412460	7508369	4933406F09Rik	lncRNA	+
chr14	7440924	7450917	Gm3755	protein_coding	-	XO	chr14	7412460	7508369	4933406F09Rik	lncRNA	+
chr14	7466362	7483762	Gm3752	protein_coding	-	XO	chr14	7412460	7508369	4933406F09Rik	lncRNA	+
chr14	7498713	7506148	Gm3760	unprocessed_pseudogene	-	XO	chr14	7412460	7508369	4933406F09Rik	lncRNA	+
chr14	14328113	14329066	Olfr31	protein_coding	+	XO	chr14	14328004	14347264	Gm48860	lncRNA	-
chr14	16238656	16249808	Oxsm	protein_coding	-	XI	chr14	16243351	16245091	Gm47794	lncRNA	+
chr14	19511367	19512558	Gm7352	processed_pseudogene	+	SD	chr14	19504718	19529194	Gm48105	lncRNA	+
chr14	20690635	20690703	Mir6946	miRNA	+	XO	chr14	20687236	20703028	6230400D17Rik	lncRNA	-
chr14	20694968	20700197	Fut11	protein_coding	+	XO	chr14	20687236	20703028	6230400D17Rik	lncRNA	-
chr14	20701523	20701629	Gm25328	snRNA	+	XO	chr14	20687236	20703028	6230400D17Rik	lncRNA	-
chr14	20703027	20704417	Chchd1	lncRNA	+	XT	chr14	20687236	20703028	6230400D17Rik	lncRNA	-
chr14	21450474	21450565	Gm25864	snRNA	+	XO	chr14	21449949	21473360	Gm30363	lncRNA	-
chr14	21845861	21848977	Comtd1	lncRNA	-	XH	chr14	21847578	21856931	A430057M04Rik	lncRNA	+
chr14	24070074	24070637	Gm6158	processed_pseudogene	+	XO	chr14	24044343	24075908	Gm31392	lncRNA	-
chr14	24617568	24621693	4931403M11Rik	lincRNA	+	SD	chr14	24617557	24788520	4930428N03Rik	lncRNA	+
chr14	24617568	24621693	4931403M11Rik	lincRNA	+	XH	chr14	24597266	24617467	4930542C16Rik	lncRNA	-
chr14	25694154	25700468	Ppif	lncRNA	+	XT	chr14	25696974	25701282	Ppifos	lncRNA	-
chr14	26375278	26376172	Gm16245	processed_pseudogene	-	XO	chr14	26356574	26400456	4933413J09Rik	lncRNA	+
chr14	26669547	26669608	Mir7672	miRNA	-	XH	chr14	26670010	26670507	9930004E17Rik	lncRNA	+
chr14	32462438	32464850	Slc18a3	protein_coding	-	XH	chr14	32465042	32483548	Gm2990	lncRNA	+
chr14	34590618	34600142	Opn4	lncRNA	-	XH	chr14	34591092	34605700	Gm49012	lncRNA	+
chr14	37467840	37467934	Gm27670	miRNA	-	SD	chr14	37465822	37467898	Gm47971	lncRNA	-
chr14	38899833	38899944	Gm27332	miRNA	-	XO	chr14	38898302	38958794	Nrg3os	lncRNA	+
chr14	43133466	43135689	Gm8114	unprocessed_pseudogene	-	XO	chr14	43131404	43146687	Gm49135	lncRNA	+
chr14	43147487	43149893	Gm3141	unprocessed_pseudogene	-	XH	chr14	43131404	43146687	Gm49135	lncRNA	+
chr14	43653029	43655027	Gm8161	unprocessed_pseudogene	-	XO	chr14	43646251	43673065	Gm21154	lncRNA	+
chr14	43671962	43677199	Gm8165	lncRNA	-	XT	chr14	43646251	43673065	Gm21154	lncRNA	+
chr14	43768934	43771115	Gm9587	unprocessed_pseudogene	-	XO	chr14	43762152	43909143	Gm49965	lncRNA	+
chr14	43779488	43784745	Gm8180	protein_coding	-	XO	chr14	43762152	43909143	Gm49965	lncRNA	+
chr14	43818765	43875517	Ear1	protein_coding	-	XO	chr14	43762152	43909143	Gm49965	lncRNA	+
chr14	43853729	43854179	Ear-ps12	unprocessed_pseudogene	-	XO	chr14	43762152	43909143	Gm49965	lncRNA	+
chr14	43864917	43865349	Ang-ps2	unprocessed_pseudogene	+	SD	chr14	43762152	43909143	Gm49965	lncRNA	+
chr14	43874875	43875334	Ear-ps9	unprocessed_pseudogene	-	XO	chr14	43762152	43909143	Gm49965	lncRNA	+
chr14	43901685	43902038	Ear-ps8	unprocessed_pseudogene	-	XO	chr14	43762152	43909143	Gm49965	lncRNA	+
chr14	43912992	43913424	Ang-ps3	unprocessed_pseudogene	+	SD	chr14	43762152	43909143	Gm49965	lncRNA	+
chr14	43991714	43992173	Ear-ps10	unprocessed_pseudogene	+	XH	chr14	43979713	43987466	Gm49087	lncRNA	-
chr14	44021600	44022458	Gm8194	processed_pseudogene	-	SU	chr14	44026002	44037526	Gm3287	lncRNA	-
chr14	44074561	44075023	Gm16545	unprocessed_pseudogene	+	XO	chr14	44074083	44075921	Gm49099	lncRNA	-
chr14	44102654	44103534	Ear2	protein_coding	+	XO	chr14	44092634	44103915	Gm49101	lncRNA	-
chr14	44197661	44203133	Gm8212	protein_coding	+	XO	chr14	44191607	44213237	1700047E10Rik	lncRNA	-
chr14	44285580	44291068	Gm8220	protein_coding	+	XO	chr14	44226217	44315511	Gm32857	lncRNA	-
chr14	44307689	44309906	Gm8224	unprocessed_pseudogene	+	XO	chr14	44226217	44315511	Gm32857	lncRNA	-
chr14	44447792	44450009	Gm21991	unprocessed_pseudogene	+	XO	chr14	44440402	44452387	Gm49779	lncRNA	-
chr14	44988195	45003820	Ptger2	protein_coding	+	XO	chr14	44972268	45006900	Gm17173	lncRNA	-
chr14	45657961	45658053	Mir5131	miRNA	-	SU	chr14	45660770	45668498	A530076I17Rik	lncRNA	-
chr14	45858076	45858546	Gm8317	processed_pseudogene	-	XO	chr14	45754689	45993170	Gm15218	lncRNA	+
chr14	45919087	45919465	Gm15220	processed_pseudogene	-	XO	chr14	45754689	45993170	Gm15218	lncRNA	+
chr14	46383520	46390669	Bmp4	protein_coding	-	XI	chr14	46387519	46389282	Gm15222	lncRNA	+
chr14	48364337	48364402	Gm23881	miRNA	-	SD	chr14	48360578	48362615	1700128I11Rik	lncRNA	-
chr14	48652499	48652602	Gm23469	snRNA	+	SD	chr14	48643461	48649774	Gm49151	lncRNA	+
chr14	48695982	48696088	Gm25380	snRNA	-	XO	chr14	48668708	48870683	Otx2os1	lncRNA	+
chr14	48769354	48769458	Gm22699	snRNA	-	XO	chr14	48668708	48870683	Otx2os1	lncRNA	+
chr14	51145002	51146767	Rnase1	protein_coding	-	SD	chr14	51142870	51144117	1810028F09Rik	lncRNA	-
chr14	51343127	51344597	Gm3719	unprocessed_pseudogene	-	SD	chr14	51317335	51345489	4930597G03Rik	lncRNA	-
chr14	51411001	51419527	Vmn2r88	protein_coding	+	SD	chr14	51377348	51431915	0	lncRNA	+
chr14	51922160	51922773	Rnase13	protein_coding	-	SU	chr14	51926264	51929660	Gm49076	lncRNA	-
chr14	52016865	52019787	Tmem253	protein_coding	+	SU	chr14	52020076	52021908	Gm49086	lncRNA	+
chr14	52209785	52209894	Snord8	snoRNA	-	XO	chr14	52197502	52213852	Gm26590	lncRNA	+
chr14	52372110	52373051	Olfr1512	protein_coding	-	SU	chr14	52373153	52375526	Gm37504	lncRNA	-
chr14	52863299	52863936	Trav15d-1-dv6d-1	TR_V_gene	+	XH	chr14	52860985	52862752	Gm6740	lncRNA	-
chr14	53032902	53033418	Trav13d-3	protein_coding	+	XO	chr14	53032417	53039466	Gm30214	lncRNA	-
chr14	53042428	53042891	Trav8d-2	IG_LV_gene	+	XH	chr14	53032417	53039466	Gm30214	lncRNA	-
chr14	53337122	53337638	Trav13n-3	protein_coding	+	XO	chr14	53336637	53343922	Gm43650	lncRNA	-
chr14	53345961	53346420	Trav8n-2	IG_LV_gene	+	XH	chr14	53336637	53343922	Gm43650	lncRNA	-
chr14	53946073	53946660	Trdv2-1	IG_LV_gene	+	XO	chr14	53918327	53961515	Gm43647	lncRNA	-
chr14	53960993	53961599	Trdv2-2	lncRNA	+	XT	chr14	53918327	53961515	Gm43647	lncRNA	-
chr14	54075004	54075515	Trdv4	IG_LV_gene	+	XO	chr14	54067579	54125395	Gm30275	lncRNA	-
chr14	54113468	54113478	Trdd1	IG_D_gene	+	XO	chr14	54067579	54125395	Gm30275	lncRNA	-
chr14	54117054	54117393	Gm23704	misc_RNA	+	XO	chr14	54067579	54125395	Gm30275	lncRNA	-
chr14	54122226	54122241	Trdd2	IG_D_gene	+	XO	chr14	54067579	54125395	Gm30275	lncRNA	-
chr14	54123138	54123188	Trdj1	IG_J_gene	+	XO	chr14	54067579	54125395	Gm30275	lncRNA	-
chr14	54136779	54136837	Trdj2	IG_J_gene	+	XO	chr14	54128298	54146287	Gm43434	lncRNA	-
chr14	54148662	54149201	Trdv5	IG_LV_gene	-	SD	chr14	54128298	54146287	Gm43434	lncRNA	-
chr14	54449958	54450064	Gm24424	snRNA	-	XH	chr14	54446318	54447861	5430430K15Rik	lncRNA	+
chr14	54936470	54939256	Cmtm5	protein_coding	+	SU	chr14	54940355	54942852	Gm49130	lncRNA	+
chr14	54975700	54975776	Mir208b	miRNA	-	XH	chr14	54973029	54973359	Gm29015	lncRNA	+
chr14	54975700	54975776	Mir208b	miRNA	-	XH	chr14	54968678	54974349	Mhrt	lncRNA	+
chr14	54975700	54975776	Mir208b	miRNA	-	XH	chr14	54979393	54991601	Gm31251	lncRNA	+
chr14	54976933	54977025	Gm17428	protein_coding	+	SD	chr14	54973029	54973359	Gm29015	lncRNA	+
chr14	54976933	54977025	Gm17428	protein_coding	+	SD	chr14	54968678	54974349	Mhrt	lncRNA	+
chr14	54976933	54977025	Gm17428	protein_coding	+	SU	chr14	54979393	54991601	Gm31251	lncRNA	+
chr14	55053869	55072397	RP23-171A13.12	antisense	+	SU	chr14	55054945	55098986	Gm20687	lncRNA	+
chr14	55060262	55092324	Zfhx2	protein_coding	-	XO	chr14	55054945	55098986	Gm20687	lncRNA	+
chr14	55082745	55084926	RP23-171A13.10	TEC	-	XO	chr14	55054945	55098986	Gm20687	lncRNA	+
chr14	55086253	55087291	RP23-171A13.9	TEC	-	XO	chr14	55054945	55098986	Gm20687	lncRNA	+
chr14	55575617	55576952	Fitm1	lncRNA	+	XT	chr14	55566159	55575991	Gm15932	lncRNA	-
chr14	55679083	55681817	Tinf2	protein_coding	-	XH	chr14	55681918	55712282	Gm49067	lncRNA	+
chr14	55683834	55683917	Gm25887	snRNA	-	XO	chr14	55681918	55712282	Gm49067	lncRNA	+
chr14	55700009	55713492	Tgm1	lncRNA	-	XT	chr14	55681918	55712282	Gm49067	lncRNA	+
chr14	56205266	56211407	Gzmf	lncRNA	-	XT	chr14	56173751	56207735	Gm4022	lncRNA	+
chr14	61309753	61311936	Arl11	protein_coding	+	XO	chr14	61292980	61318146	1700109G14Rik	lncRNA	-
chr14	61598226	61605946	Trim13	lncRNA	+	XH	chr14	61602839	61682373	Dleu2	lncRNA	-
chr14	61607482	61611916	Kcnrg	protein_coding	+	XO	chr14	61602839	61682373	Dleu2	lncRNA	-
chr14	61629093	61629206	Gm27845	misc_RNA	+	SU	chr14	61629484	61630414	Gm26916	lncRNA	+
chr14	61629093	61629206	Gm27845	misc_RNA	+	XH	chr14	61625926	61627337	Gm27010	lncRNA	-
chr14	61629093	61629206	Gm27845	misc_RNA	+	XO	chr14	61602839	61682373	Dleu2	lncRNA	-
chr14	61631880	61631972	Mir16-1	miRNA	-	SD	chr14	61625926	61627337	Gm27010	lncRNA	-
chr14	61631880	61631972	Mir16-1	miRNA	-	SD	chr14	61602839	61682373	Dleu2	lncRNA	-
chr14	61631880	61631972	Mir16-1	miRNA	-	XH	chr14	61629484	61630414	Gm26916	lncRNA	+
chr14	61632027	61632110	Mir15a	miRNA	-	SD	chr14	61625926	61627337	Gm27010	lncRNA	-
chr14	61632027	61632110	Mir15a	miRNA	-	SD	chr14	61602839	61682373	Dleu2	lncRNA	-
chr14	61632027	61632110	Mir15a	miRNA	-	XH	chr14	61629484	61630414	Gm26916	lncRNA	+
chr14	61643371	61643455	Gm27747	misc_RNA	+	XO	chr14	61602839	61682373	Dleu2	lncRNA	-
chr14	61648638	61648774	Gm27972	misc_RNA	+	SU	chr14	61648950	61667312	Gm27017	lncRNA	+
chr14	61648638	61648774	Gm27972	misc_RNA	+	XO	chr14	61602839	61682373	Dleu2	lncRNA	-
chr14	61666387	61666642	Gm27928	misc_RNA	+	SD	chr14	61648950	61667312	Gm27017	lncRNA	+
chr14	61666387	61666642	Gm27928	misc_RNA	+	XH	chr14	61667220	61670131	Gm37420	lncRNA	-
chr14	61666387	61666642	Gm27928	misc_RNA	+	XO	chr14	61602839	61682373	Dleu2	lncRNA	-
chr14	64590657	64590741	Mir124a-1	miRNA	+	SD	chr14	64587331	64593961	-1	lncRNA	+
chr14	64591185	64591271	Mir3078	miRNA	+	SD	chr14	64587331	64593961	-1	lncRNA	+
chr14	64839100	64839418	Gm20111	lncRNA	+	XT	chr14	64835855	64839259	Gm37183	lncRNA	-
chr14	69171802	69175518	Nkx2-6	lncRNA	+	XT	chr14	69164797	69171857	1700092C10Rik	lncRNA	-
chr14	69289344	69294299	Synb	protein_coding	-	XO	chr14	69284606	69305355	Gm27223	lncRNA	+
chr14	69508632	69512549	Gm27179	protein_coding	-	XO	chr14	69502856	69523605	Gm27175	lncRNA	+
chr14	69613779	69616046	RP23-103I12.7	TEC	-	SD	chr14	69582164	69683286	Gm27177	lncRNA	-
chr14	73767862	73767968	Gm24540	snRNA	-	XO	chr14	73728568	73956061	Gm49164	lncRNA	+
chr14	73796541	73797290	Gm16409	processed_pseudogene	-	XO	chr14	73728568	73956061	Gm49164	lncRNA	+
chr14	73945533	73945638	Gm22164	rRNA	-	XO	chr14	73728568	73956061	Gm49164	lncRNA	+
chr14	73955000	73955551	Gm6984	processed_pseudogene	-	XO	chr14	73728568	73956061	Gm49164	lncRNA	+
chr14	75845093	75848525	Tpt1	protein_coding	+	XT	chr14	75843379	75844964	Gm4285	lncRNA	-
chr14	75847905	75848034	Snora31	snoRNA	+	XH	chr14	75843379	75844964	Gm4285	lncRNA	-
chr14	78081021	78089007	Fam216b	protein_coding	-	XO	chr14	78070717	78090786	Gm19301	lncRNA	+
chr14	78603710	78603831	Gm26251	snoRNA	+	XH	chr14	78597770	78600476	Gm48998	lncRNA	-
chr14	79766775	79771312	Pcdh8	lncRNA	-	XT	chr14	79769908	79772743	Gm9748	lncRNA	+
chr14	86408522	86408661	Gm25115	snRNA	+	XO	chr14	86396382	86409099	Gm32913	lncRNA	-
chr14	96945019	96945110	Gm24770	snoRNA	+	XO	chr14	96924633	96992293	Gm49007	lncRNA	-
chr14	97049481	97049585	Gm27441	miRNA	-	SD	chr14	97042601	97052968	Gm33525	lncRNA	-
chr14	99773623	99773808	Gm22970	snRNA	-	SD	chr14	99747465	99792773	Gm37093	lncRNA	-
chr14	100219486	100219789	Gm16260	processed_pseudogene	+	SD	chr14	100213142	100245339	4930517O19Rik	lncRNA	+
chr14	102982549	102982632	Mir5130	miRNA	-	SU	chr14	102987412	103033803	4933432I03Rik	lncRNA	-
chr14	104628944	104629060	Gm25724	snoRNA	-	XO	chr14	104612791	104966783	D130009I18Rik	lncRNA	+
chr14	104971427	104971560	Gm24280	snoRNA	+	SD	chr14	104612791	104966783	D130009I18Rik	lncRNA	+
chr14	105623642	105623770	Mir6390	miRNA	-	SD	chr14	105621015	105643725	Gm6145	lncRNA	-
chr14	105623642	105623770	Mir6390	miRNA	-	XO	chr14	105589476	105632054	9330188P03Rik	lncRNA	+
chr14	106261123	106261253	Gm23459	snRNA	-	SD	chr14	106241684	106267934	Gm48972	lncRNA	-
chr14	106261123	106261253	Gm23459	snRNA	-	XH	chr14	106265292	106271248	Gm36107	lncRNA	+
chr14	115043671	115043754	Mir17	miRNA	+	SD	chr14	115042879	115046727	Mir17hg	lncRNA	+
chr14	115043851	115043946	Mir18	miRNA	+	SD	chr14	115042879	115046727	Mir17hg	lncRNA	+
chr14	115044000	115044081	Mir19a	miRNA	+	SD	chr14	115042879	115046727	Mir17hg	lncRNA	+
chr14	115044157	115044263	Mir20a	miRNA	+	SD	chr14	115042879	115046727	Mir17hg	lncRNA	+
chr14	115044305	115044391	Mir19b-1	miRNA	+	SD	chr14	115042879	115046727	Mir17hg	lncRNA	+
chr14	115044427	115044506	Mir92-1	miRNA	+	SD	chr14	115042879	115046727	Mir17hg	lncRNA	+
chr14	118233232	118237030	Sox21	lncRNA	-	XH	chr14	118236232	118261199	Gm4675	lncRNA	+
chr14	118258634	118258736	Mir6241	miRNA	+	SD	chr14	118236232	118261199	Gm4675	lncRNA	+
chr14	122388054	122388160	Gm25464	snRNA	-	SD	chr14	122365239	122406743	Gm5089	lncRNA	-
chr14	122475435	122479852	Zic2	protein_coding	+	XH	chr14	122470284	122475199	2610035F20Rik	lncRNA	-
chr14	122494613	122495251	Gm9399	processed_pseudogene	-	XH	chr14	122490586	122492121	Gm10837	lncRNA	+
chr14	123985276	123985816	Gm15422	processed_pseudogene	-	XH	chr14	123987635	124015684	1700024B18Rik	lncRNA	+
chr14	124005355	124007629	Gm17615	protein_coding	+	SD	chr14	123987635	124015684	1700024B18Rik	lncRNA	+
chr15	6653923	6654741	Gm7666	lncRNA	+	XT	chr15	6604341	6654303	Gm2245	lncRNA	-
chr15	8529135	8529434	Gm2348	processed_pseudogene	-	XO	chr15	8512327	8532794	Gm49249	lncRNA	+
chr15	11965330	11965589	Gm24074	misc_RNA	+	SD	chr15	11964276	11970086	1700047G03Rik	lncRNA	+
chr15	14466268	14466669	Gm9630	processed_pseudogene	+	SD	chr15	14459376	14480986	Gm49116	lncRNA	+
chr15	15819227	15819354	Gm25550	snoRNA	+	SD	chr15	15779994	15823424	4930557F08Rik	lncRNA	+
chr15	18163886	18164752	Gm8318	processed_pseudogene	+	XO	chr15	18078118	18369627	4921515E04Rik	lncRNA	-
chr15	20665219	20666750	Acot10	protein_coding	-	XO	chr15	20449119	20979940	Gm49685	lncRNA	+
chr15	20908872	20908999	Gm25711	snoRNA	+	SD	chr15	20449119	20979940	Gm49685	lncRNA	+
chr15	20920214	20920320	Gm27397	miRNA	+	SD	chr15	20449119	20979940	Gm49685	lncRNA	+
chr15	25414192	25414844	Gm5468	lncRNA	+	XH	chr15	25414637	25445640	Gm48956	lncRNA	-
chr15	25414192	25414844	Gm5468	protein_coding	+	SU	chr15	25415022	25464362	Gm48957	lncRNA	+
chr15	30601514	30601576	Gm24487	snRNA	+	XO	chr15	30597094	30626621	4930570B17Rik	lncRNA	-
chr15	32241853	32241923	Snord123	snoRNA	-	SD	chr15	32240565	32244662	Snhg18	lncRNA	-
chr15	33589606	33589736	Gm24476	rRNA	-	SU	chr15	33593881	33653436	4930592A05Rik	lncRNA	-
chr15	34440505	34443640	Rpl30	lncRNA	-	XT	chr15	34442980	34444812	D730044K07Rik	lncRNA	+
chr15	34440791	34440922	Gm24523	snoRNA	-	XH	chr15	34442980	34444812	D730044K07Rik	lncRNA	+
chr15	36205260	36205322	Gm23754	snRNA	+	XH	chr15	36206374	36210705	Gm41293	lncRNA	-
chr15	37371322	37371447	Gm23654	miRNA	-	XH	chr15	37367205	37368498	Gm28221	lncRNA	+
chr15	37421248	37422694	Gm8668	processed_pseudogene	+	XO	chr15	37421134	37433414	Gm15941	lncRNA	-
chr15	37492756	37493228	Gm3267	processed_pseudogene	+	XO	chr15	37432477	37734335	Gm49397	lncRNA	-
chr15	37603415	37603534	Gm24833	snRNA	-	SD	chr15	37432477	37734335	Gm49397	lncRNA	-
chr15	38238572	38238680	Gm24098	miRNA	+	XH	chr15	38239702	38255310	Gm49313	lncRNA	-
chr15	38243160	38244976	Gm8705	lincRNA	-	SD	chr15	38239702	38255310	Gm49313	lncRNA	-
chr15	38384981	38386300	Gm26863	lncRNA	+	XH	chr15	38385634	38404154	Gm41307	lncRNA	-
chr15	39040579	39040709	Gm24789	snoRNA	+	SD	chr15	39040432	39041282	Gm49786	lncRNA	+
chr15	46434808	46434869	Gm23562	miRNA	-	SU	chr15	46435866	46496181	4930523O13Rik	lncRNA	-
chr15	51877429	51884614	Utp23	lncRNA	+	XH	chr15	51880373	51897041	Gm34678	lncRNA	-
chr15	58314573	58324169	Klhl38	lncRNA	-	XT	chr15	58214475	58324053	Gm15943	lncRNA	+
chr15	60917589	60921270	A1bg	protein_coding	-	XO	chr15	60912974	60955320	4930402D18Rik	lncRNA	+
chr15	61357871	61358004	Gm24696	snoRNA	-	XO	chr15	61288441	61393822	Gm29904	lncRNA	+
chr15	62038029	62038201	Gm27913	misc_RNA	+	SD	chr15	62037986	62378096	Pvt1	lncRNA	+
chr15	62080245	62080443	Gm27782	misc_RNA	+	SD	chr15	62037986	62378096	Pvt1	lncRNA	+
chr15	62107187	62107272	Gm27718	misc_RNA	+	SD	chr15	62037986	62378096	Pvt1	lncRNA	+
chr15	62175422	62175548	Gm27957	misc_RNA	+	SD	chr15	62037986	62378096	Pvt1	lncRNA	+
chr15	62218221	62219332	H2afy3	processed_pseudogene	-	XO	chr15	62037986	62378096	Pvt1	lncRNA	+
chr15	62652935	62653004	Gm24810	miRNA	-	XO	chr15	62567975	62782787	Gm41333	lncRNA	+
chr15	63481214	63481276	Gm25702	snRNA	-	SD	chr15	63176838	63718289	Gm41335	lncRNA	-
chr15	63505715	63517474	RP24-559L16.1	TEC	+	XO	chr15	63176838	63718289	Gm41335	lncRNA	-
chr15	63631697	63632338	Gm5473	processed_pseudogene	+	XO	chr15	63176838	63718289	Gm41335	lncRNA	-
chr15	68337415	68337510	Mir30b	miRNA	-	SD	chr15	68334715	68337430	Gm26621	lncRNA	-
chr15	68337415	68337510	Mir30b	miRNA	-	SU	chr15	68340983	68363176	Gm20732	lncRNA	-
chr15	68337415	68337510	Mir30b	miRNA	-	SU	chr15	68338295	68341216	Gm37296	lncRNA	-
chr15	68341208	68341289	Mir30d	miRNA	-	SD	chr15	68340983	68363176	Gm20732	lncRNA	-
chr15	68341208	68341289	Mir30d	miRNA	-	SD	chr15	68338295	68341216	Gm37296	lncRNA	-
chr15	68341208	68341289	Mir30d	miRNA	-	SD	chr15	68334715	68337430	Gm26621	lncRNA	-
chr15	72255350	72255456	Gm23217	snRNA	-	XO	chr15	72161346	72287314	Gm49457	lncRNA	+
chr15	73254815	73254882	Mir151	miRNA	-	XO	chr15	73249546	73264120	1700085D07Rik	lncRNA	+
chr15	74796874	74799986	Ly6k	protein_coding	-	XO	chr15	74784065	74800640	Gm17189	lncRNA	+
chr15	74924447	74925299	Gm6610	unprocessed_pseudogene	+	SU	chr15	74929437	74936316	Gm39556	lncRNA	+
chr15	74986591	74988460	Gm8000	unprocessed_pseudogene	-	XT	chr15	74988750	74989330	Gm37042	lncRNA	+
chr15	75025294	75025507	Gm28069	unprocessed_pseudogene	+	SD	chr15	75007303	75024410	Gm28068	lncRNA	+
chr15	76085595	76090013	Nrbp2	lncRNA	-	XH	chr15	76083764	76087655	Gm48952	lncRNA	+
chr15	76267135	76267419	Gm10872	misc_RNA	-	SD	chr15	76266461	76269839	Mirt2	lncRNA	-
chr15	77443285	77444420	Gm6506	processed_pseudogene	-	XO	chr15	77427979	77461968	4930571N24Rik	lncRNA	+
chr15	77958998	77970824	Eif3d	protein_coding	-	XI	chr15	77961674	77967126	Gm17638	lncRNA	+
chr15	79002223	79002284	Mir6956	miRNA	+	XO	chr15	78994955	79011041	Gm10865	lncRNA	-
chr15	79028212	79030498	H1f0	lncRNA	+	XH	chr15	79026456	79028612	Gm49544	lncRNA	-
chr15	79028212	79030498	H1f0	protein_coding	+	XH	chr15	79015329	79025782	Gm17753	lncRNA	-
chr15	80646073	80646136	Mir6957	miRNA	+	SD	chr15	80640458	80642408	Gm49553	lncRNA	+
chr15	81586133	81586186	Gm23880	miRNA	+	XH	chr15	81584174	81585028	1110025M09Rik	lncRNA	-
chr15	82641945	82642001	Gm27463	miRNA	-	XO	chr15	82621092	82660905	Gm49431	lncRNA	+
chr15	82982870	82989134	AW121686	lncRNA	+	XH	chr15	82982725	82987830	Gm29019	lncRNA	-
chr15	85655666	85659003	RP23-463E8.1	TEC	+	SD	chr15	85653616	85707524	Lncppara	lncRNA	+
chr15	85655666	85659003	RP23-463E8.1	TEC	+	SD	chr15	85646083	85667675	Gm49539	lncRNA	+
chr15	85706603	85706697	Mirlet7c-2	miRNA	+	SD	chr15	85653616	85707524	Lncppara	lncRNA	+
chr15	85707319	85707403	Mirlet7b	miRNA	+	SD	chr15	85653616	85707524	Lncppara	lncRNA	+
chr15	87169113	87169216	n-R5s42	rRNA	+	SD	chr15	87139086	87179926	Gm49470	lncRNA	+
chr15	89472476	89477425	Arsa	lncRNA	-	XH	chr15	89476236	89484847	C230037L18Rik	lncRNA	+
chr15	98803782	98807925	Ddn	lncRNA	-	XH	chr15	98807024	98816077	B130046B21Rik	lncRNA	+
chr15	98893031	98898540	Dhh	protein_coding	-	XI	chr15	98893351	98895175	Gm49442	lncRNA	+
chr15	98931425	98934565	Tuba1b	lncRNA	-	XH	chr15	98934325	98940553	Gm41396	lncRNA	+
chr15	99254882	99255014	Gm25999	snoRNA	-	XO	chr15	99249511	99262044	1700120C14Rik	lncRNA	+
chr15	99702176	99705490	Gm17349	protein_coding	-	SU	chr15	99702664	99703976	Gm34939	lncRNA	-
chr15	99717515	99725005	Gpd1	lncRNA	+	XT	chr15	99715543	99724474	Gm16537	lncRNA	-
chr15	99725618	99728136	Cox14	protein_coding	+	XH	chr15	99715543	99724474	Gm16537	lncRNA	-
chr15	99898287	99898556	Gm9763	processed_pseudogene	-	XH	chr15	99902963	99904276	Gm49495	lncRNA	+
chr15	99937307	99937441	Gm23133	snRNA	-	XO	chr15	99931711	99953044	Gm21917	lncRNA	+
chr15	101349571	101370125	Krt80	protein_coding	-	XO	chr15	101322888	101405834	Gm35853	lncRNA	+
chr15	101369352	101369434	Mir1941	miRNA	+	SD	chr15	101322888	101405834	Gm35853	lncRNA	+
chr15	101689932	101694307	Krt6a	protein_coding	-	XI	chr15	101690309	101691941	Gm49428	lncRNA	+
chr15	102945359	102945427	Gm27337	misc_RNA	+	XO	chr15	102944062	102947730	Hotair	lncRNA	-
chr15	102947496	102947593	Gm27443	misc_RNA	+	XO	chr15	102944062	102947730	Hotair	lncRNA	-
chr15	102949434	102949608	Gm28011	misc_RNA	+	XH	chr15	102944062	102947730	Hotair	lncRNA	-
chr15	102949776	102949932	Gm27535	misc_RNA	+	XH	chr15	102944062	102947730	Hotair	lncRNA	-
chr15	103308236	103310438	Gpr84	lncRNA	-	XT	chr15	103301065	103309077	Gm49482	lncRNA	+
chr16	3926428	3926740	Gm15538	processed_pseudogene	+	XH	chr16	3927789	3929357	Gm15537	lncRNA	-
chr16	3927200	3927287	Gm23493	miRNA	+	XH	chr16	3927789	3929357	Gm15537	lncRNA	-
chr16	3927606	3928171	Gm15539	lncRNA	+	XH	chr16	3927789	3929357	Gm15537	lncRNA	-
chr16	4036942	4040024	Dnase1	lncRNA	+	XT	chr16	4032839	4037847	Gm15879	lncRNA	-
chr16	4939111	4941020	Nudt16l1	lncRNA	+	XT	chr16	4935049	4939633	Gm16861	lncRNA	-
chr16	5007288	5008309	Smim22	protein_coding	+	SU	chr16	5008370	5013418	Gm42477	lncRNA	+
chr16	5008730	5013517	Rogdi	lncRNA	-	XT	chr16	5008370	5013418	Gm42477	lncRNA	+
chr16	5324036	5324157	n-R5s30	rRNA	-	XO	chr16	5306801	5450664	Gm41414	lncRNA	+
chr16	10796326	10796886	Prm1	protein_coding	-	XH	chr16	10797943	10812726	Gm46563	lncRNA	+
chr16	10801369	10801716	Gm10343	processed_pseudogene	+	SD	chr16	10797943	10812726	Gm46563	lncRNA	+
chr16	10812915	10812994	Gm11172	protein_coding	+	SD	chr16	10797943	10812726	Gm46563	lncRNA	+
chr16	11185133	11186099	Gm7638	processed_pseudogene	-	XO	chr16	11178176	11192292	4930509G22Rik	lncRNA	+
chr16	11190254	11191265	Gm6305	processed_pseudogene	-	XO	chr16	11178176	11192292	4930509G22Rik	lncRNA	+
chr16	12760032	12761366	Gm6327	processed_pseudogene	-	SD	chr16	12629084	12945935	4930414F18Rik	lncRNA	-
chr16	13449523	13449601	Mir193b	miRNA	+	XO	chr16	13354374	13468755	Gm15738	lncRNA	-
chr16	13453840	13453926	Mir365-1	miRNA	+	XO	chr16	13354374	13468755	Gm15738	lncRNA	-
chr16	13471080	13471180	Mir6365	miRNA	-	SD	chr16	13354374	13468755	Gm15738	lncRNA	-
chr16	13471080	13471180	Mir6365	miRNA	-	XH	chr16	13462546	13467237	Gm32817	lncRNA	+
chr16	14316074	14317285	Gm15869	sense_intronic	-	XH	chr16	14311841	14314014	Gm15868	lncRNA	+
chr16	14906637	14925879	Efcab1	protein_coding	+	XO	chr16	14892328	14991883	Gm33696	lncRNA	-
chr16	17233572	17263430	Hic2	protein_coding	+	SU	chr16	17233601	17276718	Gm49573	lncRNA	+
chr16	17254960	17260326	Gm26635	lincRNA	-	XO	chr16	17233601	17276718	Gm49573	lncRNA	+
chr16	17527982	17531136	Thap7	protein_coding	-	XT	chr16	17531182	17531518	Gm49785	lncRNA	+
chr16	18218170	18219313	Gm7873	protein_coding	+	SD	chr16	18213649	18215250	4930483P17Rik	lncRNA	+
chr16	19085017	19085460	Iglv1	IG_LV_gene	-	XO	chr16	19051367	19106749	2010309G21Rik	lncRNA	+
chr16	19241211	19241679	Iglv3	IG_LV_gene	-	SD	chr16	19212660	19236776	Gm43388	lncRNA	-
chr16	19241211	19241679	Iglv3	IG_LV_gene	-	XH	chr16	19243525	19244834	A530030E21Rik	lncRNA	+
chr16	19883799	19883900	Gm27883	miRNA	-	XO	chr16	19883504	19884284	Gm49598	lncRNA	+
chr16	21256013	21256066	Mir7680	miRNA	-	SD	chr16	21247499	21296872	Gm16863	lncRNA	-
chr16	21256013	21256066	Mir7680	miRNA	-	XO	chr16	21238495	21263159	Gm49750	lncRNA	+
chr16	23179556	23180009	Gm6630	processed_pseudogene	+	SD	chr16	23175280	23224446	B630019A10Rik	lncRNA	+
chr16	23197095	23198121	Gm15746	processed_pseudogene	-	XO	chr16	23175280	23224446	B630019A10Rik	lncRNA	+
chr16	31982109	31982234	Gm26269	miRNA	+	XH	chr16	31986831	31987123	Gm49733	lncRNA	-
chr16	31987178	31987460	Gm15694	processed_pseudogene	-	SD	chr16	31986831	31987123	Gm49733	lncRNA	-
chr16	31991253	31991868	Hmgb1-ps6	processed_pseudogene	-	SD	chr16	31986831	31987123	Gm49733	lncRNA	-
chr16	32804760	32810477	Gm933	lncRNA	-	XT	chr16	32807483	32811206	Gm26769	lncRNA	+
chr16	33001903	33002021	n-R5s33	rRNA	+	XO	chr16	32985854	33108601	Gm17106	lncRNA	-
chr16	33015385	33056218	Iqcg	protein_coding	-	SD	chr16	32985854	33108601	Gm17106	lncRNA	-
chr16	33056453	33060189	Rpl35a	protein_coding	+	XO	chr16	32985854	33108601	Gm17106	lncRNA	-
chr16	33068110	33068182	Gm22231	miRNA	+	XO	chr16	32985854	33108601	Gm17106	lncRNA	-
chr16	33105361	33105445	Mir1947	miRNA	+	XO	chr16	32985854	33108601	Gm17106	lncRNA	-
chr16	36386190	36386294	Gm24218	snRNA	+	SD	chr16	36367070	36387406	Gm15845	lncRNA	+
chr16	38927209	38927307	Gm22500	snRNA	+	SD	chr16	38828906	38966070	Gm15802	lncRNA	+
chr16	39455015	39455135	Gm24795	miRNA	+	SD	chr16	39446749	39488234	Gm36903	lncRNA	+
chr16	40306219	40306312	Gm22543	snRNA	+	SU	chr16	40309433	40309871	Gm36939	lncRNA	+
chr16	43312594	43313128	Gm15711	processed_pseudogene	+	XT	chr16	43307935	43308281	Gm37946	lncRNA	-
chr16	50589859	50591154	Ccdc54	lncRNA	-	XH	chr16	50590503	50654166	4930542D17Rik	lncRNA	+
chr16	50727132	50727245	Mir6363	miRNA	+	XO	chr16	50719294	50732773	Dubr	lncRNA	-
chr16	52946804	52946929	Gm25723	snoRNA	-	XO	chr16	52829123	52971874	4930405D01Rik	lncRNA	+
chr16	55966275	55971435	Rpl24	protein_coding	+	SU	chr16	55966343	55980721	Gm28037	lncRNA	+
chr16	56909111	56910053	Gm15840	processed_pseudogene	-	XO	chr16	56886367	56921506	Gm15839	lncRNA	+
chr16	57884008	57884139	Gm24039	snoRNA	-	XO	chr16	57811487	58042341	Gm49575	lncRNA	+
chr16	73422793	73422959	Gm25699	snRNA	-	XO	chr16	73072338	73423667	4930500H12Rik	lncRNA	+
chr16	74058899	74059033	Gm22163	snoRNA	-	SU	chr16	74062050	74065853	Gm49660	lncRNA	-
chr16	76132541	76132671	Gm22268	snoRNA	-	XO	chr16	76122613	76156086	4930578N18Rik	lncRNA	+
chr16	76144977	76145724	Gm26915	processed_pseudogene	+	SD	chr16	76122613	76156086	4930578N18Rik	lncRNA	+
chr16	76819585	76841784	1700063K16Rik	transcribed_processed_pseudogene	-	SD	chr16	76819583	77010897	1700041M19Rik	lncRNA	-
chr16	77588578	77602094	Gm11146	protein_coding	-	XO	chr16	77236317	77773427	Mir99ahg	lncRNA	+
chr16	77598936	77599000	Mir99a	miRNA	+	SD	chr16	77236317	77773427	Mir99ahg	lncRNA	+
chr16	77599652	77599759	Mirlet7c-1	miRNA	+	SD	chr16	77236317	77773427	Mir99ahg	lncRNA	+
chr16	77646273	77646343	Mir125b-2	miRNA	+	SD	chr16	77236317	77773427	Mir99ahg	lncRNA	+
chr16	77646273	77646343	Mir125b-2	miRNA	+	SU	chr16	77646340	77649426	C130023A14Rik	lncRNA	+
chr16	81261703	81262015	Gm26023	misc_RNA	-	XH	chr16	81262318	81263593	7120432I05Rik	lncRNA	+
chr16	84714140	84714204	Mir155	miRNA	+	SD	chr16	84703167	84715245	Mir155hg	lncRNA	+
chr16	86845470	86845594	Gm25715	snoRNA	+	SD	chr16	86816866	86878648	Gm32624	lncRNA	+
chr16	88610709	88612279	Krtap24-1	protein_coding	-	XO	chr16	88608670	88638214	Gm49688	lncRNA	+
chr16	88614527	88614610	Gm23587	snRNA	-	XO	chr16	88608670	88638214	Gm49688	lncRNA	+
chr16	88626786	88627666	2310079G19Rik	protein_coding	-	XO	chr16	88608670	88638214	Gm49688	lncRNA	+
chr16	90602496	90602617	Gm23406	snoRNA	+	SD	chr16	90596773	90602619	Gm49714	lncRNA	+
chr16	91269772	91271933	Olig1	lncRNA	+	XH	chr16	91271777	91329043	Gm15966	lncRNA	-
chr16	91614257	91619026	Dnajc28	protein_coding	-	XO	chr16	91611468	91623861	Gm15964	lncRNA	+
chr16	91921309	91921415	Gm25245	snRNA	-	XH	chr16	91924438	91928635	Gm15976	lncRNA	+
chr16	91944071	91944148	Gm27773	miRNA	-	XO	chr16	91931237	91962915	D430001F17Rik	lncRNA	+
chr16	93369720	93369816	Mir802	miRNA	+	SD	chr16	93368239	93369029	1810044K17Rik	lncRNA	+
chr16	93369720	93369816	Mir802	miRNA	+	XH	chr16	93342504	93366668	1810053B23Rik	lncRNA	-
chr16	94497783	94526830	Dscr3	lncRNA	-	XT	chr16	94488777	94522117	Gm31323	lncRNA	+
chr16	95257558	95300260	Kcnj15	protein_coding	+	XO	chr16	95183639	95355676	Gm31641	lncRNA	-
chr16	96040845	96040968	Gm27833	miRNA	-	XH	chr16	96036090	96038743	Gm15342	lncRNA	+
chr16	96098499	96113821	Gm15341	antisense	+	SD	chr16	96097204	96114862	Gm49953	lncRNA	+
chr17	5417323	5418767	Ldhal6b	protein_coding	-	XO	chr17	5388763	5419652	Gm29050	lncRNA	+
chr17	5421464	5421565	Gm22475	miRNA	+	SD	chr17	5388763	5419652	Gm29050	lncRNA	+
chr17	6895229	6895337	Mir692-1	miRNA	-	XH	chr17	6895940	6901718	1700122H20Rik	lncRNA	+
chr17	6954965	6961156	Tagap1	lncRNA	-	XT	chr17	6948446	6957196	Gm49719	lncRNA	+
chr17	7926000	7934897	Tagap	protein_coding	+	XO	chr17	7881106	7946426	E430024P14Rik	lncRNA	-
chr17	8084075	8084162	Gm22416	snoRNA	+	XO	chr17	7982522	8101241	Gm1604a	lncRNA	-
chr17	8340406	8344112	Prr18	protein_coding	+	SD	chr17	8311109	8396852	Gm49987	lncRNA	+
chr17	8379045	8389468	Gm16702	lincRNA	-	XO	chr17	8311109	8396852	Gm49987	lncRNA	+
chr17	12770631	12770882	Gm23833	misc_RNA	+	SD	chr17	12741311	12860136	Airn	lncRNA	+
chr17	12818793	12819537	Gm16574	processed_pseudogene	+	SD	chr17	12741311	12860136	Airn	lncRNA	+
chr17	12819819	12820842	Gm7162	processed_pseudogene	-	XO	chr17	12741311	12860136	Airn	lncRNA	+
chr17	13399042	13399206	Gm25730	snRNA	-	SD	chr17	13385186	13396325	Gm49934	lncRNA	-
chr17	13516755	13518269	Gm8603	unprocessed_pseudogene	+	XO	chr17	13482553	13668891	2700054A10Rik	lncRNA	-
chr17	13516755	13518269	Gm8603	unprocessed_pseudogene	+	XO	chr17	13489273	13761378	Gm49936	lncRNA	-
chr17	13521456	13528433	Smok4a	transcribed_unprocessed_pseudogene	+	XO	chr17	13482553	13668891	2700054A10Rik	lncRNA	-
chr17	13521456	13528433	Smok4a	transcribed_unprocessed_pseudogene	+	XO	chr17	13489273	13761378	Gm49936	lncRNA	-
chr17	13534064	13534169	Gm26375	snRNA	-	SD	chr17	13489273	13761378	Gm49936	lncRNA	-
chr17	13534064	13534169	Gm26375	snRNA	-	SD	chr17	13482553	13668891	2700054A10Rik	lncRNA	-
chr17	13675376	13675482	Gm24867	snRNA	+	XH	chr17	13675662	13683516	Gm16046	lncRNA	-
chr17	13675376	13675482	Gm24867	snRNA	+	XO	chr17	13489273	13761378	Gm49936	lncRNA	-
chr17	13759370	13759985	Gm16052	antisense	-	SD	chr17	13489273	13761378	Gm49936	lncRNA	-
chr17	13759406	13760368	Gm16049	antisense	-	SD	chr17	13489273	13761378	Gm49936	lncRNA	-
chr17	19453325	19454522	Vmn2r-ps121	unprocessed_pseudogene	+	SD	chr17	19415431	19490072	4930549P19Rik	lncRNA	+
chr17	20889716	20890651	Vmn1r231	protein_coding	-	SU	chr17	20892028	20945149	Gm49761	lncRNA	-
chr17	20913205	20914363	Vmn1r232	protein_coding	-	SD	chr17	20892028	20945149	Gm49761	lncRNA	-
chr17	20933610	20934548	Vmn1r-ps144	unprocessed_pseudogene	+	XO	chr17	20892028	20945149	Gm49761	lncRNA	-
chr17	21093172	21094704	Gm6811	protein_coding	+	SD	chr17	21091208	21103347	Gm5092	lncRNA	+
chr17	21423227	21435640	Zfp54	protein_coding	+	XO	chr17	21422649	21450267	Gm49691	lncRNA	-
chr17	22734963	22735380	Gm5224	processed_pseudogene	+	SU	chr17	22739945	22751509	Gm5493	lncRNA	+
chr17	23550965	23553566	Casp16	polymorphic_pseudogene	-	XO	chr17	23550799	23565291	6330415G19Rik	lncRNA	+
chr17	23556769	23558313	Gm26695	lincRNA	+	SD	chr17	23550799	23565291	6330415G19Rik	lncRNA	+
chr17	23556769	23564226	Zfp213	protein_coding	-	XO	chr17	23550799	23565291	6330415G19Rik	lncRNA	+
chr17	23741200	23745829	Kremen2	lncRNA	-	XH	chr17	23743234	23754065	9530082P21Rik	lncRNA	+
chr17	23917458	23919441	Dcpp3	protein_coding	+	XH	chr17	23896761	23916919	Gm50057	lncRNA	-
chr17	23917458	23919441	Dcpp3	protein_coding	+	XO	chr17	23902566	23925497	Gm41545	lncRNA	-
chr17	24215054	24220851	1600002H07Rik	protein_coding	-	XO	chr17	24208861	24221730	BC028777	lncRNA	+
chr17	24528476	24528553	Snord60	snoRNA	+	SD	chr17	24528248	24528744	Rab26os	lncRNA	+
chr17	24715839	24718057	Rnf151	protein_coding	-	SU	chr17	24719531	24719965	Snhg9	lncRNA	-
chr17	24718116	24721929	Rps2	protein_coding	+	XI	chr17	24719531	24719965	Snhg9	lncRNA	-
chr17	24719676	24719803	Snora78	snoRNA	-	SD	chr17	24719531	24719965	Snhg9	lncRNA	-
chr17	24720772	24720905	Snora64	snoRNA	+	XH	chr17	24719531	24719965	Snhg9	lncRNA	-
chr17	24722060	24724478	Ndufb10	protein_coding	-	SD	chr17	24719531	24719965	Snhg9	lncRNA	-
chr17	25565892	25570686	Sox8	lncRNA	-	XT	chr17	25570358	25575043	Cerox1	lncRNA	+
chr17	25694114	25694220	Gm22645	snRNA	-	SU	chr17	25698103	25698849	4930541O19Rik	lncRNA	-
chr17	25694114	25694220	Gm22645	snRNA	-	XH	chr17	25698854	25700464	Gm50312	lncRNA	+
chr17	26269336	26270379	Gm16580	processed_pseudogene	+	XO	chr17	26267395	26274744	Gm50013	lncRNA	-
chr17	26917091	26932579	Kifc5b	protein_coding	+	XO	chr17	26896314	26934563	Gm41555	lncRNA	-
chr17	26920962	26921019	Gm27775	miRNA	+	XO	chr17	26896314	26934563	Gm41555	lncRNA	-
chr17	26933127	26937890	Phf1	lncRNA	+	XT	chr17	26896314	26934563	Gm41555	lncRNA	-
chr17	26935472	26935539	Mir6968	miRNA	+	XH	chr17	26896314	26934563	Gm41555	lncRNA	-
chr17	26937973	26939478	Cuta	protein_coding	-	SD	chr17	26896314	26934563	Gm41555	lncRNA	-
chr17	26973167	26976205	Zbtb9	lncRNA	+	XH	chr17	26974510	26978626	Gm50254	lncRNA	-
chr17	27328385	27328460	Mir7216	miRNA	+	SD	chr17	27325035	27344833	Gm10505	lncRNA	+
chr17	27563575	27565749	AI413582	lncRNA	-	XT	chr17	27565112	27566222	C130040N14Rik	lncRNA	+
chr17	27630422	27636629	Rps10	lncRNA	-	XT	chr17	27635343	27636868	Gm15420	lncRNA	+
chr17	28075050	28076677	4930526A20Rik	transcribed_processed_pseudogene	-	SU	chr17	28076418	28080295	Gm50238	lncRNA	-
chr17	28328471	28331032	Rpl10a	lncRNA	+	XH	chr17	28326953	28328521	Gm49889	lncRNA	-
chr17	28526332	28526457	Gm25195	miRNA	+	SD	chr17	28522720	28525398	E230001N04Rik	lncRNA	+
chr17	28526332	28526457	Gm25195	miRNA	+	XH	chr17	28522381	28523148	Gm20109	lncRNA	-
chr17	28526332	28526457	Gm25195	miRNA	+	XH	chr17	28528743	28530734	Gm41506	lncRNA	-
chr17	29059744	29059917	Gm27599	misc_RNA	+	SD	chr17	29053336	29060167	Gm41556	lncRNA	+
chr17	29059744	29059917	Gm27599	misc_RNA	+	XO	chr17	29057430	29079179	Trp53cor1	lncRNA	-
chr17	29490812	29496111	Pim1	lncRNA	+	XT	chr17	29446919	29491925	Gm26885	lncRNA	-
chr17	29549788	29606895	Tbc1d22b	protein_coding	+	SU	chr17	29549799	29682012	Gm28052	lncRNA	+
chr17	29595538	29595600	Mir7667	miRNA	+	SD	chr17	29549799	29682012	Gm28052	lncRNA	+
chr17	29595538	29595600	Mir7667	miRNA	+	XO	chr17	29578816	29596305	Tbc1d22bos	lncRNA	-
chr17	29614790	29641664	Rnf8	protein_coding	+	SD	chr17	29549799	29682012	Gm28052	lncRNA	+
chr17	29984034	29984141	Gm22327	snoRNA	-	XH	chr17	29979320	29982233	Gm50017	lncRNA	+
chr17	30592866	30612659	Glo1	protein_coding	-	SD	chr17	30459502	30923831	Gm50252	lncRNA	-
chr17	30624354	30875264	Dnah8	protein_coding	+	XO	chr17	30459502	30923831	Gm50252	lncRNA	-
chr17	30782026	30782129	Gm24661	snRNA	-	SD	chr17	30459502	30923831	Gm50252	lncRNA	-
chr17	30967197	30967294	Gm24026	miRNA	+	XH	chr17	30920338	30963220	Gm10503	lncRNA	-
chr17	30967197	30967294	Gm24026	miRNA	+	XH	chr17	30967683	30970005	Gm50249	lncRNA	-
chr17	31161396	31165053	Tff1	lncRNA	-	XT	chr17	31152752	31163054	Gm15318	lncRNA	+
chr17	31564962	31565043	Gm24970	miRNA	-	SD	chr17	31562782	31565692	Gm50455	lncRNA	-
chr17	31564962	31565043	Gm24970	miRNA	-	XH	chr17	31563170	31563732	Gm50108	lncRNA	+
chr17	31564962	31565043	Gm24970	miRNA	-	XH	chr17	31567163	31568854	Gm50107	lncRNA	+
chr17	31677933	31681722	Cryaa	protein_coding	+	XO	chr17	31676789	31684374	Gm50222	lncRNA	-
chr17	32815455	32822200	Zfp799	lncRNA	-	XT	chr17	32810144	32821697	Gm26693	lncRNA	+
chr17	33629090	33631779	Zfp414	protein_coding	+	SU	chr17	33630759	33645705	Gm20507	lncRNA	+
chr17	33638056	33645706	Pram1	protein_coding	+	SD	chr17	33630759	33645705	Gm20507	lncRNA	+
chr17	33905135	33906675	BC033916	lincRNA	+	XT	chr17	33908044	33909317	BC051226	lncRNA	-
chr17	33915904	33919324	Zbtb22	lncRNA	+	XT	chr17	33919279	33920485	Gm19412	lncRNA	-
chr17	33938821	33940343	Pfdn6	protein_coding	-	XI	chr17	33939069	33939424	Gm50037	lncRNA	+
chr17	33980486	33980744	Gm4152	processed_pseudogene	-	XH	chr17	33981494	33982777	AA388235	lncRNA	+
chr17	34020792	34024680	Ring1	protein_coding	-	SU	chr17	34024966	34025070	Gm26940	lncRNA	-
chr17	34024983	34025092	Mir219a-1	miRNA	-	SD	chr17	34024966	34025070	Gm26940	lncRNA	-
chr17	34024983	34025092	Mir219a-1	miRNA	-	SU	chr17	34026034	34031580	Gm20427	lncRNA	-
chr17	34026033	34028060	H2-Ke6	protein_coding	-	SD	chr17	34024966	34025070	Gm26940	lncRNA	-
chr17	34026033	34028060	H2-Ke6	protein_coding	-	SU	chr17	34026034	34031580	Gm20427	lncRNA	-
chr17	34028267	34031690	Slc39a7	protein_coding	-	SD	chr17	34026034	34031580	Gm20427	lncRNA	-
chr17	34084672	34085823	H2-Pa	unprocessed_pseudogene	+	XO	chr17	34083843	34095309	BC051537	lncRNA	-
chr17	34092340	34095234	H2-Oa	protein_coding	+	XO	chr17	34083843	34095309	BC051537	lncRNA	-
chr17	34133325	34133537	Gm20493	processed_pseudogene	-	SD	chr17	34127920	34129410	Gm50335	lncRNA	-
chr17	34197721	34201454	Psmb8	lncRNA	+	XH	chr17	34199316	34205449	Gm20496	lncRNA	-
chr17	34597862	34600936	Ager	protein_coding	+	SU	chr17	34601151	34601576	Gm20463	lncRNA	+
chr17	34601091	34603690	Rnf5	protein_coding	-	XI	chr17	34601151	34601576	Gm20463	lncRNA	+
chr17	34613349	34615971	Egfl8	protein_coding	-	SU	chr17	34614484	34627349	Gm20460	lncRNA	-
chr17	34616662	34628510	Ppt2	protein_coding	-	SD	chr17	34614484	34627349	Gm20460	lncRNA	-
chr17	34644764	34646324	Fkbpl	protein_coding	+	XH	chr17	34640846	34643977	Gm20461	lncRNA	-
chr17	34950952	34951017	Snord52	snoRNA	-	SD	chr17	34950238	34952471	1110038B12Rik	lncRNA	-
chr17	34952013	34952075	Gm25744	snoRNA	-	SD	chr17	34950238	34952471	1110038B12Rik	lncRNA	-
chr17	34954328	34954712	Gm8696	processed_pseudogene	-	SD	chr17	34950238	34952471	1110038B12Rik	lncRNA	-
chr17	34972703	34979285	Hspa1l	lncRNA	+	XT	chr17	34976899	34981788	Gm10501	lncRNA	-
chr17	34981862	34985891	Lsm2	protein_coding	+	XH	chr17	34976899	34981788	Gm10501	lncRNA	-
chr17	35121455	35124814	Gpank1	lncRNA	+	XH	chr17	35122738	35126440	Gm20522	lncRNA	-
chr17	35126373	35128855	D17H6S53E	lncRNA	+	XT	chr17	35122738	35126440	Gm20522	lncRNA	-
chr17	35162563	35162696	Gm23442	snoRNA	-	XH	chr17	35165119	35167186	Gm17705	lncRNA	+
chr17	35379617	35385290	H2-Q4	lncRNA	+	XH	chr17	35377021	35380292	Gm11131	lncRNA	-
chr17	35506018	35510772	Pou5f1	protein_coding	+	XI	chr17	35509077	35510551	Gm19553	lncRNA	-
chr17	35699203	35699309	Gm23864	snRNA	-	XH	chr17	35703896	35708244	Gm4577	lncRNA	+
chr17	35861318	35865402	Nrm	protein_coding	+	XO	chr17	35860918	35866886	Ppp1r18os	lncRNA	-
chr17	35868302	35868397	Gm28033	miRNA	-	SD	chr17	35860918	35866886	Ppp1r18os	lncRNA	-
chr17	35892677	35897431	2310061I04Rik	lncRNA	-	XH	chr17	35896946	35912215	Gm16279	lncRNA	+
chr17	35897595	35910075	Atat1	protein_coding	-	XO	chr17	35896946	35912215	Gm16279	lncRNA	+
chr17	35910379	35916389	Mrps18b	lncRNA	-	XT	chr17	35896946	35912215	Gm16279	lncRNA	+
chr17	36005695	36020560	H2-T24	protein_coding	-	XO	chr17	35994453	36038435	A930015D03Rik	lncRNA	+
chr17	36029773	36032855	H2-T23	protein_coding	-	XO	chr17	35994453	36038435	A930015D03Rik	lncRNA	+
chr17	36037128	36042747	H2-T22	lncRNA	-	XT	chr17	35994453	36038435	A930015D03Rik	lncRNA	+
chr17	36109234	36111658	C920025E04Rik	lncRNA	-	XH	chr17	36111426	36117121	BC023719	lncRNA	+
chr17	36115876	36121465	H2-T10	lncRNA	-	XT	chr17	36111426	36117121	BC023719	lncRNA	+
chr17	36164443	36168537	Gm8909	lncRNA	-	XT	chr17	36167982	36171805	Gm20478	lncRNA	+
chr17	36248636	36248948	Gm4252	lncRNA	-	XH	chr17	36248821	36253679	Gm20546	lncRNA	+
chr17	36252117	36252386	Gm6633	processed_pseudogene	-	XO	chr17	36248821	36253679	Gm20546	lncRNA	+
chr17	36255645	36258069	Rpp21	protein_coding	-	XH	chr17	36248821	36253679	Gm20546	lncRNA	+
chr17	37249475	37250867	Olfr754-ps1	unprocessed_pseudogene	+	SD	chr17	37246961	37263064	Gm20429	lncRNA	+
chr17	37262711	37263749	Olfr98	lncRNA	-	XT	chr17	37246961	37263064	Gm20429	lncRNA	+
chr17	37267076	37267238	Gm25104	snRNA	-	XH	chr17	37246961	37263064	Gm20429	lncRNA	+
chr17	39843753	39844940	RP23-81C12.2	TEC	-	SU	chr17	39847113	39848035	AY036118	lncRNA	-
chr17	39843753	39844940	RP23-81C12.2	TEC	-	XH	chr17	39846958	39848788	Gm42418	lncRNA	+
chr17	39843753	39844940	RP23-81C12.2	TEC	-	XO	chr17	39843013	39846341	Gm26917	lncRNA	+
chr17	39847526	39848829	AY036118	lncRNA	-	XT	chr17	39846958	39848788	Gm42418	lncRNA	+
chr17	39847526	39848829	AY036118	TEC	-	XH	chr17	39843013	39846341	Gm26917	lncRNA	+
chr17	45732864	45733844	1600014C23Rik	protein_coding	-	XH	chr17	45734506	45788594	F630040K05Rik	lncRNA	+
chr17	47686646	47688386	Tomm6	lncRNA	-	XH	chr17	47687610	47691083	Tomm6os	lncRNA	+
chr17	47686739	47694455	Gm21981	protein_coding	-	XI	chr17	47687610	47691083	Tomm6os	lncRNA	+
chr17	47688517	47694736	Prickle4	lncRNA	-	XH	chr17	47687610	47691083	Tomm6os	lncRNA	+
chr17	48089632	48090920	1700067P10Rik	lncRNA	+	XT	chr17	48064789	48090378	A730006G06Rik	lncRNA	-
chr17	48089632	48090920	1700067P10Rik	protein_coding	+	SU	chr17	48092779	48095632	Gm49946	lncRNA	+
chr17	48932379	49097588	Lrfn2	protein_coding	+	SD	chr17	49112263	49113515	1700008K24Rik	lncRNA	+
chr17	50218543	50219559	RP24-497H15.1	TEC	+	SD	chr17	50210135	50219642	Gm37173	lncRNA	+
chr17	55952623	55957021	Ebi3	lncRNA	+	XH	chr17	55954771	55959381	Gm16712	lncRNA	-
chr17	56242988	56243098	Mir7b	miRNA	+	SD	chr17	56241716	56242805	A230051N06Rik	lncRNA	+
chr17	57105385	57107757	Tnfsf9	lncRNA	+	XT	chr17	57091370	57105942	Gm11110	lncRNA	-
chr17	58999618	59013372	Nudt12	protein_coding	-	XO	chr17	58996251	59024981	Nudt12os	lncRNA	+
chr17	67630965	67632723	Lrrc30	protein_coding	-	SD	chr17	67559748	67629332	Gm36201	lncRNA	-
chr17	70875840	70876312	RP23-85E24.2	transcribed_processed_pseudogene	+	XO	chr17	70874349	70924996	Gm26510	lncRNA	-
chr17	70929058	70929546	Gm16519	protein_coding	+	XH	chr17	70874349	70924996	Gm26510	lncRNA	-
chr17	71552061	71589533	Spdya	lncRNA	+	XH	chr17	71557027	71598755	Trmt61b	lncRNA	-
chr17	83947588	83947696	Gm23905	rRNA	+	XH	chr17	83950991	83952463	Gm41639	lncRNA	-
chr17	84012992	84017056	RP23-127L4.1	lncRNA	-	XT	chr17	83998554	84013408	8430430B14Rik	lncRNA	+
chr17	84183931	84187947	Zfp36l2	lncRNA	-	XH	chr17	84185756	84216056	Gm36279	lncRNA	+
chr17	84624402	84624510	Gm26066	snRNA	+	XO	chr17	84575877	84626395	Gm49969	lncRNA	-
chr17	85599533	85599872	Gm27178	processed_pseudogene	+	XH	chr17	85600651	85618398	Six3os1	lncRNA	-
chr17	85611676	85611763	Gm27435	misc_RNA	+	XO	chr17	85600651	85618398	Six3os1	lncRNA	-
chr17	85613382	85613604	Gm27801	misc_RNA	+	XO	chr17	85600651	85618398	Six3os1	lncRNA	-
chr17	85614662	85614735	Gm27610	misc_RNA	+	XH	chr17	85619326	85621001	Gm28528	lncRNA	-
chr17	85614662	85614735	Gm27610	misc_RNA	+	XO	chr17	85600651	85618398	Six3os1	lncRNA	-
chr17	85614960	85615282	Gm27283	misc_RNA	+	XH	chr17	85619326	85621001	Gm28528	lncRNA	-
chr17	85614960	85615282	Gm27283	misc_RNA	+	XO	chr17	85600651	85618398	Six3os1	lncRNA	-
chr17	85616702	85616973	Gm27275	misc_RNA	+	XH	chr17	85619326	85621001	Gm28528	lncRNA	-
chr17	85616702	85616973	Gm27275	misc_RNA	+	XO	chr17	85600651	85618398	Six3os1	lncRNA	-
chr17	85618067	85618265	Gm27502	misc_RNA	+	XH	chr17	85619326	85621001	Gm28528	lncRNA	-
chr17	85618067	85618265	Gm27502	misc_RNA	+	XO	chr17	85600651	85618398	Six3os1	lncRNA	-
chr17	85619225	85619417	Gm27427	lncRNA	+	XH	chr17	85619326	85621001	Gm28528	lncRNA	-
chr17	85619225	85619417	Gm27427	misc_RNA	+	XH	chr17	85600651	85618398	Six3os1	lncRNA	-
chr17	86944109	86947887	Atp6v1e2	lncRNA	-	XT	chr17	86928973	86944709	Gm50011	lncRNA	+
chr17	87453223	87453356	Gm26005	snoRNA	-	SU	chr17	87454969	87460364	Gm30794	lncRNA	-
chr17	88342388	88342482	Gm22542	snRNA	-	SD	chr17	88253483	88388699	Gm31615	lncRNA	-
chr17	88392826	88392932	Gm23947	snRNA	-	SD	chr17	88253483	88388699	Gm31615	lncRNA	-
chr17	91812491	91812620	Gm24244	snoRNA	-	SD	chr17	91811992	91872139	Gm41654	lncRNA	-
chr17	94756698	94756872	Gm27038	processed_pseudogene	-	SU	chr17	94759944	94834799	Gm1976	lncRNA	-
chr17	94764825	94764931	Gm23964	rRNA	+	XO	chr17	94759944	94834799	Gm1976	lncRNA	-
chr17	94834906	94836642	Gm26734	lincRNA	+	XH	chr17	94759944	94834799	Gm1976	lncRNA	-
chr17	94869873	94869988	Gm23102	snRNA	-	XO	chr17	94864918	94878321	Gm20939	lncRNA	+
chr18	6490564	6490646	Mir1893	miRNA	-	XO	chr18	6490143	6496962	Gm28529	lncRNA	+
chr18	10782899	10782985	Mir133a-1	miRNA	-	SD	chr18	10781723	10785883	-1	lncRNA	-
chr18	10785446	10785567	Mir1b	miRNA	+	XO	chr18	10781723	10785883	-1	lncRNA	-
chr18	11840361	11840438	Mir1901	miRNA	-	SD	chr18	11820671	11840869	Gm6277	lncRNA	-
chr18	12498688	12499462	Gm29199	processed_pseudogene	-	SU	chr18	12501190	12504426	Gm29200	lncRNA	-
chr18	15011246	15011692	Gm6304	processed_pseudogene	+	SD	chr18	14988995	15047987	4933424G05Rik	lncRNA	+
chr18	17034662	17034791	Gm22470	snoRNA	+	SD	chr18	17019051	17137559	1700001G01Rik	lncRNA	+
chr18	17126571	17126802	Gm24015	misc_RNA	-	XO	chr18	17019051	17137559	1700001G01Rik	lncRNA	+
chr18	21302198	21302307	Gm24372	misc_RNA	+	XH	chr18	21304714	21318146	Gm50049	lncRNA	-
chr18	25598145	25598454	Gm25845	misc_RNA	-	XO	chr18	25597490	25603833	Gm3227	lncRNA	+
chr18	31437808	31447415	Syt4	lncRNA	-	XT	chr18	31440318	31449099	Gm26658	lncRNA	+
chr18	32031089	32031246	Gm16345	processed_pseudogene	+	SD	chr18	32021740	32026610	Gm16344	lncRNA	+
chr18	33795164	33795295	Gm23639	snoRNA	+	SD	chr18	33794892	33795986	Epb41l4aos	lncRNA	+
chr18	35554492	35554632	Mir1949	snoRNA	+	SD	chr18	35553371	35558316	Snhg4	lncRNA	+
chr18	35557032	35557227	Snora74a	snoRNA	+	SD	chr18	35553371	35558316	Snhg4	lncRNA	+
chr18	35829818	35861687	Cxxc5	protein_coding	+	SD	chr18	35799842	35858441	Gm50371	lncRNA	+
chr18	37013848	37014634	RP23-6P18.3	unprocessed_pseudogene	+	XO	chr18	37008868	37020679	Gm10545	lncRNA	-
chr18	37434243	37435113	RP23-161O8.1	processed_pseudogene	+	XO	chr18	37433412	37437547	Gm37446	lncRNA	-
chr18	37435621	37438654	Pcdhb12	lncRNA	+	XT	chr18	37433412	37437547	Gm37446	lncRNA	-
chr18	37652433	37654172	RP23-56B11.5	transcribed_processed_pseudogene	-	XH	chr18	37655451	37661742	3222401L13Rik	lncRNA	+
chr18	37661952	37662632	RP23-56B11.7	antisense	-	XH	chr18	37655451	37661742	3222401L13Rik	lncRNA	+
chr18	37819513	37841873	PCDHGC5	protein_coding	+	SU	chr18	37823879	37840382	Gm38182	lncRNA	+
chr18	38244828	38245382	Gm10268	processed_pseudogene	+	XO	chr18	38238405	38250565	1700086O06Rik	lncRNA	-
chr18	38714400	38714513	Gm19774	processed_pseudogene	+	SD	chr18	38601534	38789045	9630014M24Rik	lncRNA	+
chr18	38717528	38718128	Gm15335	processed_pseudogene	-	XO	chr18	38601534	38789045	9630014M24Rik	lncRNA	+
chr18	38771496	38772347	Gm8302	processed_pseudogene	-	XO	chr18	38601534	38789045	9630014M24Rik	lncRNA	+
chr18	40256962	40257684	2900055J20Rik	protein_coding	+	XO	chr18	40242774	40258495	Gm31087	lncRNA	-
chr18	40726269	40726709	Rps19-ps13	processed_pseudogene	+	SD	chr18	40721504	40733873	Gm31205	lncRNA	+
chr18	43070300	43070406	Gm22264	snRNA	-	SD	chr18	42938552	43171274	4930588A03Rik	lncRNA	-
chr18	43171159	43171827	Gm8181	lncRNA	+	XT	chr18	42938552	43171274	4930588A03Rik	lncRNA	-
chr18	45089326	45090314	Gm26928	processed_pseudogene	-	XO	chr18	45044862	45129743	Gm31706	lncRNA	+
chr18	45941007	45941133	Gm26262	snoRNA	+	XO	chr18	45683487	46045260	A330093E20Rik	lncRNA	-
chr18	46367365	46367485	Gm24617	miRNA	+	XO	chr18	46357872	46427128	Gm4107	lncRNA	-
chr18	47154373	47154422	Gm25036	miRNA	+	SD	chr18	47154189	47156186	Gm49975	lncRNA	+
chr18	48045335	48048378	Eno1b	protein_coding	+	SD	chr18	47922841	48107980	G630055G22Rik	lncRNA	+
chr18	57468486	57478134	Ctxn3	protein_coding	+	XO	chr18	57373455	57552397	4930511M06Rik	lncRNA	-
chr18	60293380	60303016	F830016B08Rik	protein_coding	+	XO	chr18	60283520	60356179	Gm50237	lncRNA	-
chr18	61467053	61467153	Gm25834	snRNA	-	SU	chr18	61470225	61484607	Lncbate10	lncRNA	-
chr18	61647816	61647903	Mir145a	miRNA	-	SU	chr18	61649625	61665537	Carmn	lncRNA	-
chr18	61647816	61647903	Mir145a	miRNA	-	XH	chr18	61639542	61647472	Bvht	lncRNA	+
chr18	61649190	61649269	Mir143	miRNA	-	SU	chr18	61649625	61665537	Carmn	lncRNA	-
chr18	61649190	61649269	Mir143	miRNA	-	XH	chr18	61639542	61647472	Bvht	lncRNA	+
chr18	61687935	61692537	Il17b	protein_coding	+	XI	chr18	61691046	61692384	Gm38165	lncRNA	-
chr18	62177817	62179959	Adrb2	protein_coding	-	XH	chr18	62180126	62184405	Gm9949	lncRNA	+
chr18	64254359	64276146	St8sia3	protein_coding	+	XO	chr18	64157721	64333706	St8sia3os	lncRNA	-
chr18	65248861	65248926	Mir122	miRNA	+	SD	chr18	65244287	65252621	Gm29966	lncRNA	+
chr18	65872820	65886579	Grp	protein_coding	+	XO	chr18	65863333	65894755	Gm30094	lncRNA	-
chr18	65907163	65907222	Gm25150	snRNA	-	SU	chr18	65910771	65911119	Gm50117	lncRNA	-
chr18	65934639	65939089	Rax	lncRNA	-	XT	chr18	65937538	65940447	Raxos1	lncRNA	+
chr18	66219264	66219333	Mir694	miRNA	-	SD	chr18	66127305	66218288	Gm50143	lncRNA	-
chr18	67774876	67795461	Seh1l	protein_coding	+	XO	chr18	67768299	67799971	4930549G23Rik	lncRNA	-
chr18	80089297	80089962	Gm21886	protein_coding	-	XH	chr18	80086806	80087560	Gm50195	lncRNA	+
chr18	81992010	81992080	Mir5127	miRNA	-	XH	chr18	81995834	81996749	Gm50293	lncRNA	+
chr18	82338774	82339816	Gm17383	pseudogene	+	XO	chr18	82336250	82361600	B020010K11Rik	lncRNA	-
chr18	82355977	82356106	Gm25060	snRNA	-	SD	chr18	82336250	82361600	B020010K11Rik	lncRNA	-
chr18	82720281	82720340	Mir5112	miRNA	+	SD	chr18	82717968	82720578	Gm50351	lncRNA	+
chr18	82720281	82720340	Mir5112	miRNA	+	XO	chr18	82712795	82726179	Gm41793	lncRNA	-
chr18	83355199	83355364	Gm24720	snRNA	-	XH	chr18	83355585	83368145	Gm31265	lncRNA	+
chr18	84742162	84742317	Gm25005	snRNA	-	XH	chr18	84744067	84754251	Gm38576	lncRNA	+
chr19	3136984	3137090	Gm25431	snRNA	-	SD	chr19	3053071	3197732	1700030N03Rik	lncRNA	-
chr19	3490309	3490413	Gm23940	snRNA	+	SD	chr19	3486090	3488014	Gm48696	lncRNA	+
chr19	3708333	3717881	1810055G02Rik	lncRNA	+	XT	chr19	3713044	3719573	Gm36787	lncRNA	-
chr19	4000580	4005816	Nudt8	protein_coding	+	XI	chr19	4000758	4001232	Gm16312	lncRNA	-
chr19	4164324	4175479	Carns1	protein_coding	-	SU	chr19	4168742	4191047	Gm50230	lncRNA	-
chr19	4192158	4195419	Ppp1ca	lncRNA	+	XH	chr19	4192109	4192782	Gm50251	lncRNA	-
chr19	4192158	4195419	Ppp1ca	protein_coding	+	XH	chr19	4168742	4191047	Gm50230	lncRNA	-
chr19	5068078	5070637	Cd248	protein_coding	+	SU	chr19	5072229	5075257	Gm46658	lncRNA	+
chr19	5390049	5394401	Tsga10ip	protein_coding	-	XT	chr19	5388336	5389601	D330050I16Rik	lncRNA	+
chr19	5415565	5415759	Gm6293	processed_pseudogene	-	XO	chr19	5406740	5422847	4930481A15Rik	lncRNA	+
chr19	5422805	5424979	Drap1	lncRNA	-	XT	chr19	5406740	5422847	4930481A15Rik	lncRNA	+
chr19	5425157	5427313	AI837181	protein_coding	+	SD	chr19	5406740	5422847	4930481A15Rik	lncRNA	+
chr19	5490485	5494029	Cfl1	protein_coding	+	XT	chr19	5488744	5489198	1700061A03Rik	lncRNA	-
chr19	5728087	5729653	Fam89b	protein_coding	-	XO	chr19	5727206	5731627	Gm16538	lncRNA	+
chr19	5728088	5731732	Sssca1	lncRNA	-	XT	chr19	5727206	5731627	Gm16538	lncRNA	+
chr19	5797562	5798549	Gm20417	processed_transcript	+	SU	chr19	5801941	5802393	Gm37376	lncRNA	+
chr19	5797562	5798549	Gm20417	processed_transcript	+	XO	chr19	5795690	5802672	Malat1	lncRNA	-
chr19	5799000	5799085	Gm27694	misc_RNA	-	SD	chr19	5795690	5802672	Malat1	lncRNA	-
chr19	5799000	5799085	Gm27694	misc_RNA	-	XH	chr19	5801941	5802393	Gm37376	lncRNA	+
chr19	5824652	5824707	Gm27702	misc_RNA	-	SU	chr19	5824708	5845478	Neat1	lncRNA	-
chr19	5844286	5844437	Gm27533	misc_RNA	-	SD	chr19	5824708	5845478	Neat1	lncRNA	-
chr19	5844286	5844437	Gm27533	misc_RNA	-	XH	chr19	5845623	5851388	Frmd8os	lncRNA	+
chr19	5844638	5844747	Gm27505	misc_RNA	-	SD	chr19	5824708	5845478	Neat1	lncRNA	-
chr19	5844638	5844747	Gm27505	misc_RNA	-	XH	chr19	5845623	5851388	Frmd8os	lncRNA	+
chr19	5844916	5845037	Gm28006	misc_RNA	-	SD	chr19	5824708	5845478	Neat1	lncRNA	-
chr19	5844916	5845037	Gm28006	misc_RNA	-	XH	chr19	5845623	5851388	Frmd8os	lncRNA	+
chr19	6264643	6264728	Mir194-2	miRNA	+	XH	chr19	6268795	6276605	Gm14963	lncRNA	-
chr19	6264844	6264932	Mir192	miRNA	+	XH	chr19	6268795	6276605	Gm14963	lncRNA	-
chr19	8723993	8724064	Gm25855	snoRNA	+	SD	chr19	8723475	8726443	Snhg1	lncRNA	+
chr19	8724251	8724325	Gm25894	snoRNA	+	SD	chr19	8723475	8726443	Snhg1	lncRNA	+
chr19	8724531	8724602	Gm24452	snoRNA	+	SD	chr19	8723475	8726443	Snhg1	lncRNA	+
chr19	8724868	8724943	Gm24453	snoRNA	+	SD	chr19	8723475	8726443	Snhg1	lncRNA	+
chr19	8725092	8725156	Gm22744	snoRNA	+	SD	chr19	8723475	8726443	Snhg1	lncRNA	+
chr19	8725341	8725409	Gm22680	snoRNA	+	SD	chr19	8723475	8726443	Snhg1	lncRNA	+
chr19	8725594	8725660	Gm23246	snoRNA	+	SD	chr19	8723475	8726443	Snhg1	lncRNA	+
chr19	8725866	8725991	Snord22	snoRNA	+	SD	chr19	8723475	8726443	Snhg1	lncRNA	+
chr19	9234897	9234978	Gm24543	miRNA	-	XO	chr19	9135157	9279175	Gm9750	lncRNA	+
chr19	10199132	10204169	Fen1	lncRNA	-	XH	chr19	10198368	10202384	Gm10143	lncRNA	+
chr19	10570478	10577362	Tmem138	protein_coding	-	XI	chr19	10573512	10576545	Gm50205	lncRNA	+
chr19	11215010	11230540	Ms4a12	protein_coding	-	XO	chr19	11196817	11299886	4930526L06Rik	lncRNA	+
chr19	11249675	11266241	Ms4a1	protein_coding	-	XO	chr19	11196817	11299886	4930526L06Rik	lncRNA	+
chr19	11273238	11283873	Ms4a5	protein_coding	-	XO	chr19	11196817	11299886	4930526L06Rik	lncRNA	+
chr19	11465250	11467043	RP23-12D3.3	TEC	+	XH	chr19	11470166	11484578	BE692007	lncRNA	-
chr19	11469366	11482192	Ms4a6c	lncRNA	+	XH	chr19	11470166	11484578	BE692007	lncRNA	-
chr19	12545740	12589768	Fam111a	protein_coding	+	XO	chr19	12517915	12596566	A330040F15Rik	lncRNA	-
chr19	12568235	12568826	Gm16274	processed_pseudogene	-	SD	chr19	12517915	12596566	A330040F15Rik	lncRNA	-
chr19	16872316	16873830	Foxb2	protein_coding	-	XO	chr19	16871092	16925014	Gm32341	lncRNA	+
chr19	17891959	17892051	Gm23063	miRNA	-	XO	chr19	17873829	17893500	Gm50181	lncRNA	+
chr19	18732741	18732904	Gm23238	lncRNA	+	XT	chr19	18731873	18732776	Gm50202	lncRNA	-
chr19	19275899	19276030	Gm25437	snoRNA	+	SU	chr19	19276471	19319651	Gm41815	lncRNA	+
chr19	19275899	19276030	Gm25437	snoRNA	+	XO	chr19	19244035	19276348	Gm50212	lncRNA	-
chr19	20033504	20033635	Gm22684	snoRNA	-	SD	chr19	20005989	20060758	Gm3728	lncRNA	-
chr19	20373428	20390944	Anxa1	protein_coding	-	XO	chr19	20324856	20444883	1500015L24Rik	lncRNA	+
chr19	21938079	21938384	Gm5514	processed_pseudogene	+	XH	chr19	21941978	21950889	Gm50133	lncRNA	-
chr19	23296329	23296435	Gm24263	snRNA	+	SD	chr19	23282096	23300362	Gm41821	lncRNA	+
chr19	29808108	29812974	Ranbp6	lncRNA	-	XH	chr19	29806663	29810096	Gm50373	lncRNA	+
chr19	34473786	34475135	Ch25h	lncRNA	-	XH	chr19	34474808	34481546	Gm26902	lncRNA	+
chr19	35051202	35055247	Gm5248	lncRNA	-	XH	chr19	35054465	35083440	Gm50137	lncRNA	+
chr19	35759933	35760065	Gm25611	snoRNA	-	SD	chr19	35700349	35766127	Gm41836	lncRNA	-
chr19	37179186	37179291	Gm23918	rRNA	+	SD	chr19	37173843	37196541	A330032B11Rik	lncRNA	+
chr19	37463746	37463851	Gm23026	snRNA	+	SU	chr19	37465253	37471834	1700122C19Rik	lncRNA	+
chr19	43280798	43281697	Gm6776	processed_pseudogene	+	SD	chr19	43266936	43277654	Gm34517	lncRNA	+
chr19	43932316	43932432	n-R5s21	rRNA	+	SD	chr19	43920473	43927928	Gm50217	lncRNA	+
chr19	45075241	45079289	Kazald1	protein_coding	+	SD	chr19	45058841	45110342	Gm35867	lncRNA	+
chr19	45150680	45156943	Tlx1	lncRNA	+	XT	chr19	45154057	45159304	Tlx1os	lncRNA	-
chr19	45300454	45311011	Gm29595	lincRNA	-	SU	chr19	45300455	45338435	Gm28578	lncRNA	-
chr19	45311300	45312247	Gm29593	lincRNA	-	SD	chr19	45300455	45338435	Gm28578	lncRNA	-
chr19	45747734	45749591	Npm3	lncRNA	-	XH	chr19	45749508	45752310	Gm15491	lncRNA	+
chr19	46003478	46006173	Hps6	protein_coding	+	SD	chr19	45998137	46013386	4930505N22Rik	lncRNA	+
chr19	46131897	46135307	Elovl3	protein_coding	+	SD	chr19	46124930	46131471	Gm50306	lncRNA	+
chr19	50144491	50144615	Gm27749	miRNA	+	SU	chr19	50146938	50180652	Gm45352	lncRNA	+
chr2	6132208	6133956	Gm13384	lncRNA	-	XH	chr2	6132869	6140568	Gm10857	lncRNA	+
chr2	6188465	6213033	Echdc3	lncRNA	-	XH	chr2	6193251	6321611	A230108P19Rik	lncRNA	+
chr2	11014762	11014890	Gm23877	snoRNA	-	SD	chr2	11013808	11013918	Gm37343	lncRNA	-
chr2	11365241	11367451	RP23-291L24.7	TEC	-	SD	chr2	11338366	11398501	8030442B05Rik	lncRNA	-
chr2	13003457	13011806	C1ql3	protein_coding	-	XI	chr2	13004365	13007600	Gm37824	lncRNA	+
chr2	14672255	14672972	Gm13312	processed_pseudogene	+	SU	chr2	14673404	14674812	2900092N22Rik	lncRNA	+
chr2	14721134	14722124	Gm13315	processed_pseudogene	+	XO	chr2	14706834	14739722	Gm10848	lncRNA	-
chr2	17563514	17563626	Mir6419	miRNA	+	SD	chr2	17559060	17559998	Gm13324	lncRNA	+
chr2	18057846	18057903	Mir7655	miRNA	+	XH	chr2	18054193	18056613	1810059C17Rik	lncRNA	-
chr2	18758984	18759764	Gm13333	processed_pseudogene	+	XO	chr2	18742715	18760862	Gm20539	lncRNA	-
chr2	19445663	19447501	Ptf1a	lncRNA	+	XT	chr2	19441508	19446674	Ptf1aos	lncRNA	-
chr2	19677251	19678603	Gm13347	processed_pseudogene	+	XO	chr2	19676711	19686157	Gm13346	lncRNA	-
chr2	22762744	22763078	Gm13356	processed_pseudogene	-	XH	chr2	22755984	22762273	1700092C17Rik	lncRNA	+
chr2	24448064	24448158	Gm24604	miRNA	-	XO	chr2	24440418	24486855	Gm13415	lncRNA	+
chr2	24483495	24484080	Gm27193	transcribed_processed_pseudogene	+	SD	chr2	24440418	24486855	Gm13415	lncRNA	+
chr2	24592902	24594513	Gm13416	processed_pseudogene	-	XH	chr2	24588566	24591225	Gm38383	lncRNA	+
chr2	25288145	25289189	Tmem210	protein_coding	+	SU	chr2	25291220	25298925	Grin1os	lncRNA	+
chr2	25289915	25291180	Lrrc26	protein_coding	+	SU	chr2	25291220	25298925	Grin1os	lncRNA	+
chr2	25608635	25617678	Ccdc183	protein_coding	-	XO	chr2	25607892	25631761	Fcnaos	lncRNA	+
chr2	25620067	25622005	Tmem141	protein_coding	-	XO	chr2	25607892	25631761	Fcnaos	lncRNA	+
chr2	25624666	25628030	Fcna	protein_coding	-	XO	chr2	25607892	25631761	Fcnaos	lncRNA	+
chr2	25706739	25707721	Bmyc	protein_coding	+	XO	chr2	25705850	25709716	A230005M16Rik	lncRNA	-
chr2	25784617	25787022	Gm13539	antisense	+	XO	chr2	25783940	25794650	Gm13538	lncRNA	-
chr2	26136814	26140521	C330006A16Rik	lincRNA	-	XI	chr2	26138546	26139543	1810012K08Rik	lncRNA	+
chr2	26348121	26352110	Dnlz	protein_coding	-	XH	chr2	26352645	26371952	Gm13562	lncRNA	+
chr2	26352176	26360918	Card9	lncRNA	-	XH	chr2	26352645	26371952	Gm13562	lncRNA	+
chr2	26382802	26389316	Sdccag3	lncRNA	-	XT	chr2	26381526	26389018	Gm13563	lncRNA	+
chr2	26637177	26640244	Snhg7	lincRNA	-	XH	chr2	26640372	26645944	Snhg7os	lncRNA	+
chr2	26637848	26637974	Snora43	snoRNA	-	XH	chr2	26640372	26645944	Snhg7os	lncRNA	+
chr2	26639189	26639326	Snora17	snoRNA	-	XH	chr2	26640372	26645944	Snhg7os	lncRNA	+
chr2	27539805	27539930	Gm25541	snRNA	-	XH	chr2	27540426	27543362	Gm13421	lncRNA	+
chr2	29093835	29094105	Gm13396	processed_pseudogene	-	XO	chr2	29088666	29094501	Gm13393	lncRNA	+
chr2	30721210	30721293	Mir3089	miRNA	+	XH	chr2	30713147	30720057	Gm14488	lncRNA	-
chr2	32050946	32051008	Mir7674	miRNA	+	XO	chr2	32050086	32064911	Gm16534	lncRNA	-
chr2	32570858	32573579	Dpm2	protein_coding	+	XT	chr2	32574184	32575684	9430097D07Rik	lncRNA	-
chr2	34097397	34111444	RP23-241O13.3	lincRNA	-	SD	chr2	34018289	34107735	C230014O12Rik	lncRNA	-
chr2	34916250	34916353	Gm24905	snRNA	+	SD	chr2	34912871	34916014	Gm13448	lncRNA	+
chr2	38852735	38852810	Mir181a-2	miRNA	+	SD	chr2	38823257	38852370	Nr6a1os	lncRNA	+
chr2	38852735	38852810	Mir181a-2	miRNA	+	XH	chr2	38852978	38854937	Gm44144	lncRNA	-
chr2	38853830	38853918	Mir181b-2	miRNA	+	SD	chr2	38823257	38852370	Nr6a1os	lncRNA	+
chr2	38853830	38853918	Mir181b-2	miRNA	+	XO	chr2	38852978	38854937	Gm44144	lncRNA	-
chr2	45111171	45111301	Gm27761	misc_RNA	+	SD	chr2	45110707	45114087	Zeb2os	lncRNA	+
chr2	45112488	45112548	Gm27676	misc_RNA	+	SD	chr2	45110707	45114087	Zeb2os	lncRNA	+
chr2	45113313	45113415	Gm27404	misc_RNA	+	SD	chr2	45110707	45114087	Zeb2os	lncRNA	+
chr2	45113908	45113984	Gm27645	misc_RNA	+	SD	chr2	45110707	45114087	Zeb2os	lncRNA	+
chr2	48140146	48140578	Gm13471	processed_pseudogene	+	XO	chr2	48062548	48457245	Gm13481	lncRNA	-
chr2	48298908	48299161	Gm13482	processed_pseudogene	+	XO	chr2	48062548	48457245	Gm13481	lncRNA	-
chr2	48384219	48384338	Gm25338	snRNA	-	SD	chr2	48062548	48457245	Gm13481	lncRNA	-
chr2	48388037	48388350	Gm13472	processed_pseudogene	+	XO	chr2	48062548	48457245	Gm13481	lncRNA	-
chr2	50409332	50409613	Gm13486	processed_pseudogene	+	SD	chr2	50380400	50412610	Gm48908	lncRNA	+
chr2	50409332	50409613	Gm13486	processed_pseudogene	+	SD	chr2	50296810	50433967	Gm13483	lncRNA	+
chr2	55433514	55437860	Gm26794	lincRNA	-	XH	chr2	55411790	55433435	Gm14033	lncRNA	+
chr2	66145654	66145875	Gm13616	processed_pseudogene	-	XO	chr2	66125317	66175250	Gm28638	lncRNA	+
chr2	66447036	66447407	Rpl35-ps1	processed_pseudogene	-	XO	chr2	66440880	66546026	Gm13629	lncRNA	+
chr2	66529414	66530746	Gm13627	processed_pseudogene	-	XO	chr2	66440880	66546026	Gm13629	lncRNA	+
chr2	67173834	67184950	Gm1322	lincRNA	+	XO	chr2	67157646	67194735	Gm13598	lncRNA	-
chr2	67675457	67675516	Mir7224	miRNA	+	XH	chr2	67677031	67687282	Gm26743	lncRNA	-
chr2	68831017	68831406	Gm13612	processed_pseudogene	+	XO	chr2	68820311	68845252	Gm36231	lncRNA	-
chr2	70508819	70540884	Erich2	protein_coding	+	XO	chr2	70489940	70563357	Gad1os	lncRNA	-
chr2	70523042	70523767	RP23-118N13.1	TEC	-	SD	chr2	70489940	70563357	Gad1os	lncRNA	-
chr2	71528113	71533981	Dlx1	protein_coding	+	XO	chr2	71516454	71537891	Dlx1as	lncRNA	-
chr2	71748075	71750162	Gm17250	lincRNA	-	XH	chr2	71737815	71745397	Gm13647	lncRNA	+
chr2	71748075	71750162	Gm17250	lincRNA	-	XO	chr2	71747507	71750200	Gm13663	lncRNA	+
chr2	71748075	71750162	Gm17250	lncRNA	-	XH	chr2	71749925	71759801	Gm13662	lncRNA	+
chr2	71762238	71762767	Gm13739	processed_pseudogene	-	XH	chr2	71749925	71759801	Gm13662	lncRNA	+
chr2	74679557	74687016	Hoxd11	protein_coding	+	SU	chr2	74683446	74694194	Gm28309	lncRNA	+
chr2	74691924	74695105	Hoxd10	protein_coding	+	SD	chr2	74683446	74694194	Gm28309	lncRNA	+
chr2	74691924	74695105	Hoxd10	protein_coding	+	SU	chr2	74695520	74697365	Gm14396	lncRNA	+
chr2	74691924	74695105	Hoxd10	protein_coding	+	XT	chr2	74696768	74697586	Gm28793	lncRNA	-
chr2	74697727	74700208	Hoxd9	protein_coding	+	SD	chr2	74695520	74697365	Gm14396	lncRNA	+
chr2	74697727	74700208	Hoxd9	protein_coding	+	XT	chr2	74696768	74697586	Gm28793	lncRNA	-
chr2	74704615	74707933	Hoxd8	protein_coding	+	XO	chr2	74703248	74716130	Hoxd3os1	lncRNA	-
chr2	74762980	74765142	Hoxd1	protein_coding	+	XH	chr2	74748422	74762896	Haglr	lncRNA	-
chr2	75191073	75191822	Rps6-ps4	processed_pseudogene	-	XO	chr2	75138843	75317820	2600014E21Rik	lncRNA	+
chr2	75192277	75192759	Gm13653	processed_pseudogene	+	SD	chr2	75138843	75317820	2600014E21Rik	lncRNA	+
chr2	79022821	79023271	Gm14466	processed_pseudogene	-	XO	chr2	78972672	79098851	Gm37004	lncRNA	+
chr2	79038533	79038734	Gm14469	processed_pseudogene	-	XO	chr2	78972672	79098851	Gm37004	lncRNA	+
chr2	83744484	83745736	Dnmt3l-ps1	processed_pseudogene	-	SD	chr2	83737782	83759865	Gm13684	lncRNA	-
chr2	85156101	85158642	Gm13712	unprocessed_pseudogene	-	XH	chr2	85160778	85193325	Gm13713	lncRNA	+
chr2	85162334	85196699	Lrrc55	lncRNA	-	XH	chr2	85160778	85193325	Gm13713	lncRNA	+
chr2	91200162	91200267	Gm23390	snRNA	+	XO	chr2	91195906	91202778	Gm13783	lncRNA	-
chr2	91944870	91944930	Mir6999	miRNA	-	XH	chr2	91945703	91948688	Gm9821	lncRNA	+
chr2	92872887	92873309	Gm13792	processed_pseudogene	-	SD	chr2	92856167	92913663	Gm13791	lncRNA	-
chr2	93421929	93422007	Mir7001	miRNA	-	XH	chr2	93403547	93417830	Gm13807	lncRNA	+
chr2	94184027	94184130	Gm23630	miRNA	-	SD	chr2	94160636	94264918	Mir670hg	lncRNA	-
chr2	94241364	94241453	Mir129-2	miRNA	-	SD	chr2	94160636	94264918	Mir670hg	lncRNA	-
chr2	94251879	94264758	E530001K10Rik	lincRNA	-	SD	chr2	94160636	94264918	Mir670hg	lncRNA	-
chr2	94261300	94261399	Mir670	miRNA	-	SD	chr2	94160636	94264918	Mir670hg	lncRNA	-
chr2	96999624	97000293	Gm17075	processed_pseudogene	+	XO	chr2	96987018	97083561	4930445B16Rik	lncRNA	-
chr2	97039912	97041312	Gm17076	processed_pseudogene	+	XO	chr2	96987018	97083561	4930445B16Rik	lncRNA	-
chr2	103810886	103811617	Gm13878	processed_pseudogene	-	SD	chr2	103804452	103810622	4930547E08Rik	lncRNA	-
chr2	104068047	104068550	Gm10799	protein_coding	-	XH	chr2	104065797	104067486	Gm10912	lncRNA	+
chr2	104556661	104557489	Gm13884	processed_pseudogene	+	SU	chr2	104559163	104571429	Platr14	lncRNA	+
chr2	105092018	105093760	Gm11060	protein_coding	+	XO	chr2	105076538	105126510	Wt1os	lncRNA	-
chr2	105121792	105122051	Gm27715	misc_RNA	-	SD	chr2	105076538	105126510	Wt1os	lncRNA	-
chr2	105122188	105122481	Gm27538	misc_RNA	-	SD	chr2	105076538	105126510	Wt1os	lncRNA	-
chr2	105123062	105123183	Gm27636	misc_RNA	-	SD	chr2	105076538	105126510	Wt1os	lncRNA	-
chr2	105125222	105125454	Gm27308	misc_RNA	-	SD	chr2	105076538	105126510	Wt1os	lncRNA	-
chr2	105537093	105537482	Gm13890	transcribed_processed_pseudogene	-	SD	chr2	105536080	105670330	Pax6os1	lncRNA	-
chr2	105554201	105554845	Rpl10-ps1	transcribed_processed_pseudogene	-	SD	chr2	105536080	105670330	Pax6os1	lncRNA	-
chr2	105657862	105660692	RP23-431C3.3	lincRNA	-	SD	chr2	105536080	105670330	Pax6os1	lncRNA	-
chr2	110209178	110210165	Gm13937	processed_pseudogene	-	XO	chr2	110196889	110256131	Gm13936	lncRNA	+
chr2	110218003	110218109	Gm22997	snRNA	+	SD	chr2	110196889	110256131	Gm13936	lncRNA	+
chr2	111257117	111258055	Olfr1276	protein_coding	+	XH	chr2	111246131	111256163	Gm13962	lncRNA	-
chr2	111664228	111665166	Olfr1299	protein_coding	+	SD	chr2	111661456	111705461	Gm44840	lncRNA	+
chr2	111691520	111692453	Olfr1300-ps1	processed_pseudogene	+	SD	chr2	111661456	111705461	Gm44840	lncRNA	+
chr2	111698723	111698878	Gm13922	processed_pseudogene	-	XO	chr2	111661456	111705461	Gm44840	lncRNA	+
chr2	113384681	113385199	Gm13967	processed_pseudogene	+	XH	chr2	113387107	113441094	Gm13963	lncRNA	-
chr2	113400459	113410250	Gm13965	processed_transcript	+	XO	chr2	113387107	113441094	Gm13963	lncRNA	-
chr2	114009601	114013619	Gjd2	lncRNA	-	XH	chr2	114013602	114032292	A530058N18Rik	lncRNA	+
chr2	114047282	114053548	Actc1	protein_coding	-	XO	chr2	114013563	114068324	A530058N18Rik	lncRNA	+
chr2	114270111	114270428	Gm25103	misc_RNA	+	XH	chr2	114272174	114273435	Gm29234	lncRNA	-
chr2	115036419	115037312	Gm13973	processed_pseudogene	-	SD	chr2	114897916	115220708	Gm28494	lncRNA	-
chr2	115036419	115037312	Gm13973	processed_pseudogene	-	XO	chr2	114854093	115043972	Gm13974	lncRNA	+
chr2	116968039	116968173	Gm25514	snRNA	-	SU	chr2	116972575	116976428	Gm29340	lncRNA	-
chr2	118077805	118077962	Gm25308	snRNA	-	SD	chr2	117857291	118111202	Gm13986	lncRNA	-
chr2	118248689	118248782	Gm22800	miRNA	-	SU	chr2	118253255	118279430	Gm29232	lncRNA	-
chr2	127688405	127690247	Gm14245	processed_pseudogene	+	SU	chr2	127691899	127700488	Gm14244	lncRNA	+
chr2	128195993	128429349	Gm14005	processed_transcript	-	SD	chr2	128178319	128502765	Morrbid	lncRNA	-
chr2	128237693	128239643	Gm14012	lincRNA	-	SD	chr2	128178319	128502765	Morrbid	lncRNA	-
chr2	128606985	128607194	Gm14007	processed_pseudogene	+	XO	chr2	128601765	128609630	Gm39929	lncRNA	-
chr2	128952972	128953450	Gm14028	processed_pseudogene	-	SU	chr2	128955671	128957861	4933427J07Rik	lncRNA	-
chr2	129168700	129170488	Gm14026	processed_pseudogene	+	XO	chr2	129158666	129180667	AI847159	lncRNA	-
chr2	129299610	129309972	Il1a	lncRNA	-	XT	chr2	129297370	129307826	Gm14023	lncRNA	+
chr2	129378271	129379396	Spcs2-ps	unprocessed_pseudogene	-	XH	chr2	129369897	129375748	Il1bos	lncRNA	+
chr2	130531678	130531744	Gm23876	miRNA	-	XH	chr2	130523995	130527284	9530056E24Rik	lncRNA	+
chr2	130880866	130882133	Gm14048	processed_pseudogene	+	XO	chr2	130873059	130906396	A730017L22Rik	lncRNA	-
chr2	131545850	131562283	Adra1d	protein_coding	+	SD	chr2	131561614	131563179	Gm14285	lncRNA	+
chr2	131845356	131845595	Gm14282	transcribed_processed_pseudogene	-	SD	chr2	131820006	131847683	5330413P13Rik	lncRNA	-
chr2	131846395	131847688	Gm14281	lncRNA	+	XT	chr2	131820006	131847683	5330413P13Rik	lncRNA	-
chr2	132249162	132253314	Pcna	protein_coding	-	XH	chr2	132253357	132261333	AV099323	lncRNA	+
chr2	138622614	138622922	Gm14063	processed_pseudogene	-	XO	chr2	138589392	138649122	Gm14061	lncRNA	+
chr2	139383832	139384340	Gm14071	processed_pseudogene	-	SD	chr2	139256876	139677714	Gm14066	lncRNA	-
chr2	139493913	139637674	Sptlc3	protein_coding	+	XO	chr2	139256876	139677714	Gm14066	lncRNA	-
chr2	139588227	139588330	Gm27385	snRNA	+	XO	chr2	139256876	139677714	Gm14066	lncRNA	-
chr2	144142488	144143373	Gm11687	processed_pseudogene	-	SD	chr2	144098815	144207990	Gm5535	lncRNA	-
chr2	145352843	145352936	Gm22731	rRNA	+	SD	chr2	145337648	145379381	Gm14093	lncRNA	+
chr2	147250462	147250785	Gm22261	misc_RNA	-	XO	chr2	147184083	147331681	-2	lncRNA	+
chr2	147280603	147281084	Gm14115	processed_pseudogene	-	XO	chr2	147184083	147331681	-2	lncRNA	+
chr2	147289755	147290730	Gm14113	processed_pseudogene	+	SD	chr2	147184083	147331681	-2	lncRNA	+
chr2	149743175	149744161	Gm14130	lncRNA	+	XH	chr2	149743927	149798743	Gm14133	lncRNA	-
chr2	151282975	151283110	Gm23005	snoRNA	-	SD	chr2	151264603	151278836	Gm14144	lncRNA	-
chr2	151300944	151301079	Gm24077	snoRNA	+	SU	chr2	151301974	151316247	4930442J19Rik	lncRNA	+
chr2	151435794	151435929	Gm24868	snoRNA	-	SD	chr2	151380650	151432402	Gm14152	lncRNA	-
chr2	151458956	151460309	Gm14150	processed_pseudogene	+	XH	chr2	151462045	151469613	Gm14146	lncRNA	-
chr2	152353615	152354566	Gm14165	processed_pseudogene	+	SD	chr2	152345669	152375324	Gm14164	lncRNA	+
chr2	152368755	152376638	Nrsn2	lncRNA	-	XT	chr2	152345669	152375324	Gm14164	lncRNA	+
chr2	155542647	155542937	Mipep-ps	processed_pseudogene	+	XH	chr2	155547040	155556930	Acss2os	lncRNA	-
chr2	155546385	155546846	Gm20637	processed_pseudogene	+	XH	chr2	155547040	155556930	Acss2os	lncRNA	-
chr2	156386107	156386322	Gm22316	misc_RNA	+	XH	chr2	156388065	156392979	2900097C17Rik	lncRNA	-
chr2	156386741	156387222	Rpl21-ps9	processed_pseudogene	+	XH	chr2	156388065	156392979	2900097C17Rik	lncRNA	-
chr2	156840007	156855570	Tgif2	lncRNA	+	XH	chr2	156844351	156862963	5430405H02Rik	lncRNA	-
chr2	156860305	156860550	Gm27651	misc_RNA	+	XH	chr2	156856616	156858212	4930518I15Rik	lncRNA	-
chr2	156860305	156860550	Gm27651	misc_RNA	+	XO	chr2	156844351	156862963	5430405H02Rik	lncRNA	-
chr2	158356424	158356554	Gm24411	snoRNA	-	SD	chr2	158353700	158361580	Snhg17	lncRNA	-
chr2	158356424	158356554	Gm24411	snoRNA	-	SU	chr2	158359797	158359928	Gm23925	lncRNA	-
chr2	158358360	158358472	Gm26003	snoRNA	-	SD	chr2	158353700	158361580	Snhg17	lncRNA	-
chr2	158358360	158358472	Gm26003	snoRNA	-	SU	chr2	158359797	158359928	Gm23925	lncRNA	-
chr2	158359798	158359929	Gm23925	snoRNA	-	SD	chr2	158353700	158361580	Snhg17	lncRNA	-
chr2	158610767	158615748	Slc32a1	protein_coding	+	XI	chr2	158610910	158611820	Gm14205	lncRNA	-
chr2	159978274	159978722	Gm14220	transcribed_processed_pseudogene	+	SD	chr2	159947341	159981288	4933416E03Rik	lncRNA	+
chr2	160624468	160624592	Gm23968	miRNA	+	XH	chr2	160568379	160619971	Gm14221	lncRNA	-
chr2	160845613	160846470	Gm11447	processed_pseudogene	+	XO	chr2	160840836	160888028	Gm16751	lncRNA	-
chr2	163492318	163502612	R3hdml	lncRNA	+	XH	chr2	163493807	163541720	Hnf4aos	lncRNA	-
chr2	163514516	163514618	Gm25881	snRNA	+	XO	chr2	163493807	163541720	Hnf4aos	lncRNA	-
chr2	164176327	164182742	Wfdc5	lncRNA	-	XH	chr2	164177584	164196564	A730032A03Rik	lncRNA	+
chr2	164189231	164190608	Wfdc12	protein_coding	-	XO	chr2	164177584	164196564	A730032A03Rik	lncRNA	+
chr2	164198863	164200130	Wfdc15a	protein_coding	-	XH	chr2	164177584	164196564	A730032A03Rik	lncRNA	+
chr2	164761659	164761974	Gm22596	misc_RNA	+	XO	chr2	164754242	164769666	Gm11457	lncRNA	-
chr2	166189697	166189801	Gm22687	lncRNA	+	XH	chr2	166189793	166190862	Gm11466	lncRNA	-
chr2	167063016	167063204	Gm27494	misc_RNA	+	SD	chr2	167062934	167065862	Zfas1	lncRNA	+
chr2	167063473	167063565	Gm25878	snoRNA	+	SD	chr2	167062934	167065862	Zfas1	lncRNA	+
chr2	167064998	167065086	Gm23201	snoRNA	+	SD	chr2	167062934	167065862	Zfas1	lncRNA	+
chr2	167065276	167065365	Snord12	snoRNA	+	SD	chr2	167062934	167065862	Zfas1	lncRNA	+
chr2	167591395	167591870	Gm11475	processed_pseudogene	+	SD	chr2	167553314	167607845	Gm11476	lncRNA	+
chr2	167688915	167690418	Cebpb	protein_coding	+	SU	chr2	167691177	167729172	A530013C23Rik	lncRNA	+
chr2	174286608	174286671	Gm27899	misc_RNA	+	XO	chr2	174281237	174295436	Gnasas1	lncRNA	-
chr2	174295071	174295192	Gm27869	misc_RNA	+	XO	chr2	174281237	174295436	Gnasas1	lncRNA	-
chr2	174295337	174295461	Gm27849	lncRNA	+	XT	chr2	174281237	174295436	Gnasas1	lncRNA	-
chr2	180099465	180104488	Hrh3	protein_coding	-	XI	chr2	180099913	180101502	Gm17180	lncRNA	+
chr2	180389048	180389124	Mir1a-1	miRNA	+	XH	chr2	180370491	180385885	B230312C02Rik	lncRNA	-
chr2	180774381	180776900	Bhlhe23	protein_coding	-	SD	chr2	180766214	180775403	Gm14343	lncRNA	-
chr2	180837838	180837955	Gm22842	misc_RNA	+	SD	chr2	180836481	180848914	Gm14344	lncRNA	+
chr2	180837838	180837955	Gm22842	misc_RNA	+	XO	chr2	180829490	180889660	Gm14342	lncRNA	-
chr2	180894031	180894117	Mir124a-3	miRNA	+	SU	chr2	180894105	180895220	Gm27032	lncRNA	+
chr2	180894031	180894117	Mir124a-3	miRNA	+	XH	chr2	180829490	180889660	Gm14342	lncRNA	-
chr2	181587900	181587968	Mir7006	miRNA	-	XH	chr2	181578480	181585170	Uckl1os	lncRNA	+
chr3	5881041	5881150	Gm25352	miRNA	+	XO	chr3	5880832	5885503	Gm37350	lncRNA	-
chr3	5885595	5885704	Gm25144	miRNA	+	XH	chr3	5880832	5885503	Gm37350	lncRNA	-
chr3	9072767	9073211	RP23-241J7.2	processed_pseudogene	+	SD	chr3	9061964	9071074	4930539M17Rik	lncRNA	+
chr3	9402175	9402485	Gm22604	misc_RNA	+	SU	chr3	9403064	9437233	C030034L19Rik	lncRNA	+
chr3	10309048	10309226	RP23-436F15.7	processed_pseudogene	+	SD	chr3	10304791	10305120	A930014E01Rik	lncRNA	+
chr3	13471655	13474596	RP23-333L19.1	lncRNA	+	XH	chr3	13470439	13471829	Gm2464	lncRNA	-
chr3	14973569	14974552	Gm7132	processed_pseudogene	-	XO	chr3	14971201	15002727	A930001A20Rik	lncRNA	+
chr3	17795662	17795770	Mir124a-2	miRNA	+	SD	chr3	17789921	17808970	-2	lncRNA	+
chr3	17803621	17803747	Gm23441	snRNA	-	XO	chr3	17789921	17808970	-2	lncRNA	+
chr3	22080494	22081115	RP24-487F9.1	processed_pseudogene	-	SD	chr3	22074412	22076142	Gm43672	lncRNA	-
chr3	28697903	28728363	Slc2a2	lncRNA	+	XH	chr3	28702667	28781108	1700112D23Rik	lncRNA	-
chr3	28729878	28731359	RP24-468O23.2	lincRNA	+	XO	chr3	28702667	28781108	1700112D23Rik	lncRNA	-
chr3	28764713	28765360	Gm6505	processed_pseudogene	-	SD	chr3	28702667	28781108	1700112D23Rik	lncRNA	-
chr3	28805436	28807424	Rpl22l1	lncRNA	+	XH	chr3	28807205	28813985	Gm33051	lncRNA	-
chr3	28805436	28807424	Rpl22l1	protein_coding	+	XH	chr3	28802804	28805336	Gm32950	lncRNA	-
chr3	29771284	29771422	RP24-211P23.4	processed_pseudogene	+	XH	chr3	29773466	29893177	Gm33206	lncRNA	-
chr3	29926536	29926974	RP23-212H4.4	processed_pseudogene	+	SD	chr3	29891014	29924191	Mannr	lncRNA	+
chr3	30561658	30562129	RP24-120B18.1	processed_pseudogene	-	SD	chr3	30552697	30564243	Gm38258	lncRNA	-
chr3	30595346	30595757	Gm24413	misc_RNA	-	SD	chr3	30594844	30595733	1600017P15Rik	lncRNA	-
chr3	30597073	30599939	Actrt3	protein_coding	-	SD	chr3	30594844	30595733	1600017P15Rik	lncRNA	-
chr3	33393057	33393199	Gm24780	snoRNA	-	SU	chr3	33393382	33394847	Gm37398	lncRNA	-
chr3	33959069	33959200	Gm23175	snoRNA	-	XH	chr3	33956200	33957147	4930502C17Rik	lncRNA	+
chr3	34298518	34322289	Gm20446	lincRNA	-	SD	chr3	34298172	34351712	Gm38505	lncRNA	-
chr3	34298518	34322289	Gm20446	lincRNA	-	XO	chr3	34104270	34682619	Sox2ot	lncRNA	+
chr3	34324819	34351715	Gm20514	lincRNA	-	SD	chr3	34298172	34351712	Gm38505	lncRNA	-
chr3	34324819	34351715	Gm20514	lincRNA	-	XO	chr3	34104270	34682619	Sox2ot	lncRNA	+
chr3	34560340	34560553	Gm27403	misc_RNA	+	SD	chr3	34104270	34682619	Sox2ot	lncRNA	+
chr3	34560340	34560553	Gm27403	misc_RNA	+	XH	chr3	34565265	34572202	Gm42695	lncRNA	-
chr3	34560716	34560782	Gm27294	misc_RNA	+	SD	chr3	34104270	34682619	Sox2ot	lncRNA	+
chr3	34560716	34560782	Gm27294	misc_RNA	+	XH	chr3	34565265	34572202	Gm42695	lncRNA	-
chr3	34638368	34638639	Mir1897	misc_RNA	+	SD	chr3	34104270	34682619	Sox2ot	lncRNA	+
chr3	34638368	34638639	Mir1897	misc_RNA	+	SU	chr3	34643264	34646096	Gm42692	lncRNA	+
chr3	34650005	34652461	Sox2	protein_coding	+	SD	chr3	34104270	34682619	Sox2ot	lncRNA	+
chr3	34653178	34653285	Gm27611	misc_RNA	+	SD	chr3	34104270	34682619	Sox2ot	lncRNA	+
chr3	37307749	37312708	Cetn4	lncRNA	-	XH	chr3	37312519	37404866	Gm43439	lncRNA	+
chr3	37312554	37321453	Bbs12	protein_coding	+	SD	chr3	37312519	37404866	Gm43439	lncRNA	+
chr3	37327072	37327390	Gm12540	processed_pseudogene	+	SD	chr3	37312519	37404866	Gm43439	lncRNA	+
chr3	37639947	37644598	Spry1	lncRNA	+	XH	chr3	37638579	37640656	Gm42922	lncRNA	-
chr3	37639947	37644598	Spry1	protein_coding	+	SU	chr3	37644607	37647952	Gm43820	lncRNA	+
chr3	37714740	37715164	Rps23-ps	processed_pseudogene	+	SD	chr3	37708021	37711208	Gm43414	lncRNA	+
chr3	37959612	37960087	Gm7799	processed_pseudogene	-	XO	chr3	37898813	37992728	Gm20755	lncRNA	+
chr3	37995105	37995235	Gm22899	snoRNA	-	XH	chr3	37898813	37992728	Gm20755	lncRNA	+
chr3	38107440	38107922	Rpl21-ps10	processed_pseudogene	-	SD	chr3	38094629	38130191	Gm43821	lncRNA	-
chr3	39635964	39636082	n-R5s195	lncRNA	-	XH	chr3	39636059	39638777	Gm42781	lncRNA	+
chr3	40518818	40518891	Gm23810	miRNA	+	XO	chr3	40504867	40522912	1700017G19Rik	lncRNA	-
chr3	45332161	45332410	RP23-370F14.2	processed_pseudogene	-	SD	chr3	45280437	45378260	2610316D01Rik	lncRNA	-
chr3	45775933	45776191	RP23-290N20.1	processed_pseudogene	-	SD	chr3	45775424	45775894	Gm38166	lncRNA	-
chr3	50598069	50598444	RP23-264F2.3	processed_pseudogene	-	SD	chr3	50516399	50607223	Gm6209	lncRNA	-
chr3	51571111	51571423	RP24-511H12.8	processed_pseudogene	-	XH	chr3	51560035	51567117	5031434O11Rik	lncRNA	+
chr3	51828912	51829028	n-R5s196	rRNA	+	XH	chr3	51829385	51830405	3110080O07Rik	lncRNA	-
chr3	53512002	53512126	Gm23675	snoRNA	+	SD	chr3	53508928	53510103	6430500D05Rik	lncRNA	+
chr3	57616609	57616722	Mir6377	miRNA	+	XO	chr3	57612697	57625824	Gm26671	lncRNA	-
chr3	58521969	58525873	Serp1	protein_coding	-	XT	chr3	58526930	58528121	6720482G16Rik	lncRNA	+
chr3	59001620	59001695	Gm27793	misc_RNA	+	XH	chr3	59002471	59006158	Gm43570	lncRNA	-
chr3	61362250	61365951	B430305J03Rik	protein_coding	-	SD	chr3	61358549	61361897	Gm37696	lncRNA	-
chr3	63481112	63483879	RP24-79E2.2	lincRNA	-	XT	chr3	63483884	63484369	Gm37279	lncRNA	+
chr3	63488993	63489098	Gm24946	snRNA	+	SD	chr3	63483884	63484369	Gm37279	lncRNA	+
chr3	64632574	64662261	Vmn2r-ps11	transcribed_unprocessed_pseudogene	-	SU	chr3	64632863	64844743	Gm26939	lncRNA	-
chr3	64690660	64844765	Vmn2r7	protein_coding	-	SD	chr3	64632863	64844743	Gm26939	lncRNA	-
chr3	64744749	64745645	Vmn2r-ps12	unprocessed_pseudogene	-	SD	chr3	64632863	64844743	Gm26939	lncRNA	-
chr3	64770286	64770518	Gm20698	transcribed_unprocessed_pseudogene	-	SD	chr3	64632863	64844743	Gm26939	lncRNA	-
chr3	65968902	65969151	RP24-372I24.3	processed_pseudogene	-	XH	chr3	65969914	65971922	Gm37078	lncRNA	+
chr3	66088109	66088261	Gm26442	snRNA	-	XH	chr3	66086684	66087792	Gm37822	lncRNA	+
chr3	67573160	67573291	Gm25919	snoRNA	-	SD	chr3	67570565	67572821	4930402C01Rik	lncRNA	-
chr3	68869586	68872163	1110032F04Rik	lncRNA	+	XH	chr3	68867917	68870266	Gm17641	lncRNA	-
chr3	73146849	73146958	Gm24544	miRNA	+	SD	chr3	73066316	73594830	Gm20754	lncRNA	+
chr3	73207703	73208001	Gm22538	misc_RNA	-	XO	chr3	73066316	73594830	Gm20754	lncRNA	+
chr3	77562600	77563870	RP23-35F4.1	processed_pseudogene	-	SU	chr3	77564956	77571342	Gm37806	lncRNA	-
chr3	80088082	80089159	RP23-406D2.1	processed_pseudogene	-	XO	chr3	80054892	80213085	A330069K06Rik	lncRNA	+
chr3	80194480	80194630	RP23-121N19.1	unprocessed_pseudogene	-	XO	chr3	80054892	80213085	A330069K06Rik	lncRNA	+
chr3	80202492	80205598	RP23-121N19.2	antisense	-	XO	chr3	80054892	80213085	A330069K06Rik	lncRNA	+
chr3	82793656	82793897	Gm22038	misc_RNA	-	SU	chr3	82794975	82812234	Gm43348	lncRNA	-
chr3	82892579	82903973	Lrat	protein_coding	-	XO	chr3	82876705	82943638	Rbm46os	lncRNA	+
chr3	85467377	85467498	Mir466k	miRNA	+	XH	chr3	85435187	85466128	Gm45790	lncRNA	-
chr3	86137940	86142702	Rps3a1	protein_coding	-	XT	chr3	86142757	86145545	Gm37933	lncRNA	+
chr3	86138791	86138858	Snord73a	snoRNA	-	XH	chr3	86142757	86145545	Gm37933	lncRNA	+
chr3	86140618	86140688	Rnu73b	snoRNA	-	XH	chr3	86142757	86145545	Gm37933	lncRNA	+
chr3	86144937	86145369	RP23-383K24.4	processed_pseudogene	-	XO	chr3	86142757	86145545	Gm37933	lncRNA	+
chr3	88199102	88204595	AI849053	lincRNA	-	XI	chr3	88200623	88203481	AW047730	lncRNA	+
chr3	88215171	88215257	Mir3093	miRNA	+	SD	chr3	88206813	88229959	Gm3764	lncRNA	+
chr3	88215589	88215696	Gm25641	miRNA	-	XO	chr3	88206813	88229959	Gm3764	lncRNA	+
chr3	88862919	88863080	Gm23054	snRNA	+	XO	chr3	88845025	88900001	Gm43713	lncRNA	-
chr3	89177473	89182765	Scamp3	protein_coding	+	XI	chr3	89180755	89182293	Gm16069	lncRNA	-
chr3	89313899	89322965	Efna3	protein_coding	-	XI	chr3	89315439	89318907	Gm15998	lncRNA	+
chr3	89333390	89338028	Efna4	lncRNA	-	XH	chr3	89337850	89347831	4731419I09Rik	lncRNA	+
chr3	89338542	89349996	Adam15	lncRNA	-	XH	chr3	89337850	89347831	4731419I09Rik	lncRNA	+
chr3	89400988	89402793	Lenep	protein_coding	-	XH	chr3	89391850	89398779	Gm15417	lncRNA	+
chr3	89995457	89998686	Hax1	protein_coding	-	XH	chr3	89998760	90021445	Gm19710	lncRNA	+
chr3	90010595	90010730	Gm24608	snoRNA	-	XO	chr3	89998760	90021445	Gm19710	lncRNA	+
chr3	90011153	90011210	Mir7669	miRNA	-	XO	chr3	89998760	90021445	Gm19710	lncRNA	+
chr3	92122204	92123947	Prr9	protein_coding	-	SD	chr3	92102578	92142736	4930511M18Rik	lncRNA	-
chr3	92122204	92123947	Prr9	protein_coding	-	XH	chr3	92113192	92119317	Gm43735	lncRNA	+
chr3	92134994	92142754	Lelp1	protein_coding	-	SD	chr3	92102578	92142736	4930511M18Rik	lncRNA	-
chr3	93305015	93305469	RP23-227A12.2	processed_pseudogene	+	SU	chr3	93306468	93309011	Gm37913	lncRNA	+
chr3	93305015	93305469	RP23-227A12.2	processed_pseudogene	+	XH	chr3	93306468	93465359	Gm37245	lncRNA	-
chr3	93319749	93333570	Hrnr	protein_coding	+	XO	chr3	93306468	93465359	Gm37245	lncRNA	-
chr3	93393699	93399442	Rptn	protein_coding	+	SD	chr3	93393698	93394896	Gm37857	lncRNA	+
chr3	93393699	93399442	Rptn	protein_coding	+	XO	chr3	93306468	93465359	Gm37245	lncRNA	-
chr3	93420646	93421428	RP23-346B13.4	processed_pseudogene	-	SD	chr3	93306468	93465359	Gm37245	lncRNA	-
chr3	93433197	93433305	Gm22752	miRNA	-	SD	chr3	93306468	93465359	Gm37245	lncRNA	-
chr3	93433215	93433766	Gm5278	processed_pseudogene	-	SD	chr3	93306468	93465359	Gm37245	lncRNA	-
chr3	93442330	93449077	Tchh	protein_coding	+	XO	chr3	93306468	93465359	Gm37245	lncRNA	-
chr3	94362444	94364567	C2cd4d	protein_coding	+	XH	chr3	94356507	94360842	Gm36070	lncRNA	-
chr3	94399219	94404501	Lingo4	lncRNA	+	XT	chr3	94392971	94402848	Gm43401	lncRNA	-
chr3	94409395	94412883	1700040D17Rik	lincRNA	-	XH	chr3	94413401	94418286	Gm42463	lncRNA	+
chr3	94954075	94961561	Rfx5	lncRNA	+	XT	chr3	94959034	94962048	B230398E01Rik	lncRNA	-
chr3	95004168	95004239	Mir7013	miRNA	+	XO	chr3	94998800	95004869	Gm15265	lncRNA	-
chr3	95219135	95228677	Mllt11	lncRNA	-	XH	chr3	95217457	95226658	Gm16740	lncRNA	+
chr3	95878503	95882251	Ciart	protein_coding	-	XO	chr3	95871522	95889093	C920021L13Rik	lncRNA	+
chr3	95883954	95892005	BC028528	lncRNA	-	XT	chr3	95871522	95889093	C920021L13Rik	lncRNA	+
chr3	96176361	96176487	Gm22027	snoRNA	+	XH	chr3	96167464	96172416	Gm17690	lncRNA	-
chr3	96219865	96220308	Hist2h2ab	lncRNA	+	XT	chr3	96209627	96220168	Gm15444	lncRNA	-
chr3	96220361	96220880	Hist2h2ac	protein_coding	-	SD	chr3	96209627	96220168	Gm15444	lncRNA	-
chr3	96221119	96223738	Hist2h2be	protein_coding	+	XH	chr3	96209627	96220168	Gm15444	lncRNA	-
chr3	96238108	96239127	Hist2h3c2	protein_coding	-	XH	chr3	96239393	96241819	Gm20632	lncRNA	+
chr3	96239749	96240276	Hist2h2aa1	protein_coding	-	SU	chr3	96243550	96246380	Gm20633	lncRNA	-
chr3	96239749	96240276	Hist2h2aa1	protein_coding	-	XO	chr3	96239393	96241819	Gm20632	lncRNA	+
chr3	96245497	96246082	Hist2h2aa2	protein_coding	+	SD	chr3	96239393	96241819	Gm20632	lncRNA	+
chr3	96245497	96246082	Hist2h2aa2	protein_coding	+	SU	chr3	96245554	96248509	Gm20634	lncRNA	+
chr3	96245497	96246082	Hist2h2aa2	protein_coding	+	XO	chr3	96243550	96246380	Gm20633	lncRNA	-
chr3	96246685	96248504	Hist2h3c1	protein_coding	+	SD	chr3	96245554	96248509	Gm20634	lncRNA	+
chr3	96246685	96248504	Hist2h3c1	protein_coding	+	XH	chr3	96243550	96246380	Gm20633	lncRNA	-
chr3	96261682	96263311	Hist2h4	protein_coding	-	XT	chr3	96263785	96265386	Gm38227	lncRNA	+
chr3	96268654	96269141	Hist2h3b	protein_coding	+	SD	chr3	96263785	96265386	Gm38227	lncRNA	+
chr3	96268654	96269141	Hist2h3b	protein_coding	+	SU	chr3	96269721	96279001	Gm42743	lncRNA	+
chr3	96268654	96269141	Hist2h3b	protein_coding	+	XO	chr3	96267075	96270289	Gm20628	lncRNA	-
chr3	96349927	96358480	Gm17580	lncRNA	+	XH	chr3	96348627	96357094	Gm26553	lncRNA	-
chr3	96359953	96360117	Rnu1b1	snRNA	-	SD	chr3	96348627	96357094	Gm26553	lncRNA	-
chr3	96359953	96360117	Rnu1b1	snRNA	-	XH	chr3	96345287	96358480	Platr30	lncRNA	+
chr3	96412910	96413361	Gm21960	processed_pseudogene	-	SU	chr3	96414437	96414833	Terc	lncRNA	-
chr3	96460024	96460189	Rnu1b6	snRNA	-	SU	chr3	96464072	96466924	Gm43534	lncRNA	-
chr3	96460024	96460189	Rnu1b6	snRNA	-	XO	chr3	96458209	96470656	Gm10685	lncRNA	+
chr3	96557957	96561883	Txnip	protein_coding	+	XO	chr3	96555765	96566801	Gm15441	lncRNA	-
chr3	96724265	96724400	Gm22581	snoRNA	-	SU	chr3	96724526	96725320	Gm42783	lncRNA	-
chr3	100680265	100680555	Gm12485	processed_pseudogene	+	XH	chr3	100678292	100680094	Gm43463	lncRNA	-
chr3	103800605	103809444	Dclre1b	protein_coding	-	XI	chr3	103803129	103808439	Gm15471	lncRNA	+
chr3	104092381	104092482	Gm23830	snRNA	+	XH	chr3	104095444	104097880	Gm42700	lncRNA	-
chr3	104752727	104753165	Gm6485	processed_pseudogene	-	SU	chr3	104753123	104773270	Gm43584	lncRNA	-
chr3	105973711	105987423	Ovgp1	protein_coding	+	SD	chr3	105959503	105984600	Gm42890	lncRNA	+
chr3	105996957	106014646	Pifo	lncRNA	-	XT	chr3	106001561	106017539	Gm42722	lncRNA	+
chr3	107036162	107038129	Kcna3	protein_coding	+	SU	chr3	107039504	107054347	AI504432	lncRNA	+
chr3	107036162	107038129	Kcna3	protein_coding	+	XO	chr3	106934382	107093894	Gm27008	lncRNA	-
chr3	107895821	107898686	Gstm5	lncRNA	+	XT	chr3	107888850	107896213	4933431E20Rik	lncRNA	-
chr3	108019885	108020328	Gm12502	processed_pseudogene	+	XO	chr3	108018294	108025249	Gm12498	lncRNA	-
chr3	108239383	108239911	Gm12501	processed_pseudogene	-	XO	chr3	108226787	108240247	Gm40123	lncRNA	+
chr3	108383839	108388231	Psrc1	protein_coding	+	XH	chr3	108379277	108383741	Gm12522	lncRNA	-
chr3	108554338	108554751	Scarna2	snoRNA	-	XH	chr3	108555467	108556904	Gm43435	lncRNA	+
chr3	108936823	108938238	Gm12521	antisense	-	SU	chr3	108939873	108940446	Gm9857	lncRNA	-
chr3	110246109	110250998	Prmt6	lncRNA	-	XT	chr3	110250015	110253706	C130013H08Rik	lncRNA	+
chr3	115710433	115715055	S1pr1	protein_coding	-	XT	chr3	115715150	115716728	Gm9889	lncRNA	+
chr3	116528137	116528578	Gm4596	processed_pseudogene	-	XT	chr3	116532149	116532587	Gm43651	lncRNA	+
chr3	118433843	118433944	Mir137	miRNA	+	SD	chr3	118430324	118530022	Gm26871	lncRNA	+
chr3	118433843	118433944	Mir137	miRNA	+	SU	chr3	118434770	118435997	Gm9916	lncRNA	+
chr3	118434721	118434830	Gm24155	miRNA	+	SD	chr3	118430324	118530022	Gm26871	lncRNA	+
chr3	118434721	118434830	Gm24155	miRNA	+	SU	chr3	118434770	118435997	Gm9916	lncRNA	+
chr3	120609966	120610093	Gm25013	snoRNA	-	SD	chr3	120604109	120886733	6530403H02Rik	lncRNA	-
chr3	122256728	122257219	Gm6061	processed_pseudogene	+	XO	chr3	122255958	122293720	Gm17494	lncRNA	-
chr3	122274414	122285269	Dnttip2	protein_coding	+	XO	chr3	122255958	122293720	Gm17494	lncRNA	-
chr3	122293585	122293703	Mir760	miRNA	-	SD	chr3	122255958	122293720	Gm17494	lncRNA	-
chr3	122293585	122293703	Mir760	miRNA	-	XO	chr3	122293439	122303613	Gm40190	lncRNA	+
chr3	122861884	122862676	Gm9364	pseudogene	+	XH	chr3	122864737	122924116	4933405D12Rik	lncRNA	-
chr3	122895072	122899506	Fabp2	protein_coding	+	XO	chr3	122864737	122924116	4933405D12Rik	lncRNA	-
chr3	122913070	122919360	Gm10959	protein_coding	-	SD	chr3	122864737	122924116	4933405D12Rik	lncRNA	-
chr3	122924242	122926194	1810037I17Rik	protein_coding	+	XH	chr3	122864737	122924116	4933405D12Rik	lncRNA	-
chr3	123507937	123508066	Snora24	snoRNA	-	SD	chr3	123507552	123508404	Snhg8	lncRNA	-
chr3	124292074	124292505	Gm9372	processed_pseudogene	+	SD	chr3	124246237	124318984	Gm43731	lncRNA	+
chr3	124321037	124323260	Tram1l1	protein_coding	+	SD	chr3	124246237	124318984	Gm43731	lncRNA	+
chr3	124848589	124848886	Gm23673	misc_RNA	+	SD	chr3	124839509	124936860	Gm42825	lncRNA	+
chr3	127005369	127005500	Gm25501	snoRNA	+	XH	chr3	127008309	127010801	Gm43750	lncRNA	-
chr3	130726831	130730398	Rpl34	protein_coding	-	XH	chr3	130730460	130771643	Gm42997	lncRNA	+
chr3	130870949	130871076	Gm26090	snoRNA	-	SD	chr3	130838455	130937337	2010110G14Rik	lncRNA	-
chr3	130870949	130871076	Gm26090	snoRNA	-	XH	chr3	130867279	130868777	Gm36520	lncRNA	+
chr3	130870949	130871076	Gm26090	snoRNA	-	XH	chr3	130874073	130876824	Gm43351	lncRNA	+
chr3	131918259	131918353	Gm26103	snRNA	+	SD	chr3	131759805	132030743	Gm29865	lncRNA	+
chr3	133588406	133588537	Gm23011	snoRNA	-	XH	chr3	133545097	133585053	Gm42567	lncRNA	+
chr3	134240505	134240583	Mir1895	miRNA	-	SD	chr3	133830668	134240641	Gm26691	lncRNA	-
chr3	137864487	137866922	H2afz	protein_coding	+	XT	chr3	137862589	137864374	Gm43403	lncRNA	-
chr3	138217823	138233382	Adh7	protein_coding	+	XO	chr3	138210716	138240405	0610031O16Rik	lncRNA	-
chr3	143674943	143675067	Gm24728	snoRNA	+	XO	chr3	143670892	143712210	Gm6260	lncRNA	-
chr3	145646971	145649985	Cyr61	protein_coding	-	XH	chr3	145650312	145677580	Gm17501	lncRNA	+
chr3	146645193	146651317	4930503B20Rik	protein_coding	-	XO	chr3	146641932	146651715	Gm16325	lncRNA	+
chr3	149340903	149341008	Gm26468	snRNA	-	SD	chr3	149284418	149445301	Gm30382	lncRNA	-
chr3	149340903	149341008	Gm26468	snRNA	-	XO	chr3	149304829	149345840	Gm5149	lncRNA	+
chr3	153313713	153313824	Gm27405	miRNA	+	XH	chr3	153309370	153312745	A530083M17Rik	lncRNA	-
chr3	153785053	153785134	Gm10042	pseudogene	+	XH	chr3	153789305	153792087	5730460C07Rik	lncRNA	-
chr3	153844209	153855082	Asb17	lncRNA	+	XT	chr3	153836902	153852424	Asb17os	lncRNA	-
chr3	153910563	153910633	Snord45b	snoRNA	-	XH	chr3	153913095	153916858	Gm43400	lncRNA	+
chr3	153911610	153911690	Gm24494	snoRNA	-	XH	chr3	153913095	153916858	Gm43400	lncRNA	+
chr3	153912125	153912204	Snord45c	snoRNA	-	XH	chr3	153913095	153916858	Gm43400	lncRNA	+
chr3	155092018	155092128	Gm26456	misc_RNA	+	SU	chr3	155094865	155097655	Gm37482	lncRNA	+
chr3	157210929	157211060	Gm24373	snoRNA	+	XH	chr3	157207662	157208860	4930566N20Rik	lncRNA	-
chr4	3258349	3259233	Gm11783	processed_pseudogene	+	SD	chr4	3242055	3258092	AI838599	lncRNA	+
chr4	4133531	4138819	Penk	lncRNA	-	XH	chr4	4138321	4188703	A830012C17Rik	lncRNA	+
chr4	7763264	7763500	Gm11794	processed_pseudogene	-	XO	chr4	7759670	7763930	Gm11795	lncRNA	+
chr4	8456166	8456498	Gm11810	processed_pseudogene	-	SD	chr4	8438522	8454247	Gm37386	lncRNA	-
chr4	10580812	10581102	Gm11813	processed_pseudogene	+	XO	chr4	10479962	10797811	1700123O12Rik	lncRNA	-
chr4	11979560	11981265	Gm10604	protein_coding	-	XO	chr4	11966565	11994280	1700123M08Rik	lncRNA	+
chr4	11980669	11988471	Gm26895	lincRNA	+	SD	chr4	11966565	11994280	1700123M08Rik	lncRNA	+
chr4	14239618	14239744	Gm24908	snoRNA	+	XH	chr4	14219496	14237450	1700120G11Rik	lncRNA	-
chr4	16246269	16249514	Gm11865	processed_pseudogene	+	SD	chr4	16164110	16266225	A530072M11Rik	lncRNA	+
chr4	18471669	18472114	Gm11854	processed_pseudogene	-	XO	chr4	18407349	18891842	Gm11867	lncRNA	+
chr4	18472189	18474298	Gm11853	processed_pseudogene	+	SD	chr4	18407349	18891842	Gm11867	lncRNA	+
chr4	18708748	18709033	Gm25971	misc_RNA	+	SD	chr4	18407349	18891842	Gm11867	lncRNA	+
chr4	18730217	18730548	Gm24419	misc_RNA	-	XO	chr4	18407349	18891842	Gm11867	lncRNA	+
chr4	18844202	18845679	Gm11868	processed_pseudogene	-	XO	chr4	18407349	18891842	Gm11867	lncRNA	+
chr4	24966407	25009233	Gpr63	protein_coding	+	SU	chr4	24966517	25271099	Gm11906	lncRNA	+
chr4	25086849	25087200	Gm11900	processed_pseudogene	-	XO	chr4	24966517	25271099	Gm11906	lncRNA	+
chr4	25199908	25242876	Fhl5	protein_coding	-	XO	chr4	24966517	25271099	Gm11906	lncRNA	+
chr4	30701949	30702057	Gm22831	miRNA	-	XO	chr4	30664596	30796663	4930556G01Rik	lncRNA	+
chr4	30701973	30702535	Gm11920	processed_pseudogene	-	XO	chr4	30664596	30796663	4930556G01Rik	lncRNA	+
chr4	30767570	30767889	Gm11921	processed_pseudogene	-	XO	chr4	30664596	30796663	4930556G01Rik	lncRNA	+
chr4	36951406	36951743	AL844160.1	pseudogene	-	XH	chr4	36952966	36988032	Gm12371	lncRNA	+
chr4	37297905	37298025	Gm22732	snoRNA	+	SD	chr4	37249403	37332515	Gm12374	lncRNA	+
chr4	38663809	38664730	Gm12382	processed_pseudogene	+	XO	chr4	38571667	38855483	Gm12381	lncRNA	-
chr4	39450295	39451776	1700009N14Rik	protein_coding	+	XH	chr4	39398045	39450249	Gm17094	lncRNA	-
chr4	41638144	41640324	Enho	lncRNA	-	XT	chr4	41639378	41641416	Gm12406	lncRNA	+
chr4	41638144	41640324	Enho	protein_coding	-	XT	chr4	41642185	41643077	Gm12405	lncRNA	+
chr4	41893388	41895236	Gm13302	unprocessed_pseudogene	+	XO	chr4	41893278	41942092	Gm13307	lncRNA	-
chr4	41903610	41904743	Gm21541	protein_coding	+	XO	chr4	41893278	41942092	Gm13307	lncRNA	-
chr4	41921405	41923020	Ccl19-ps1	unprocessed_pseudogene	+	XO	chr4	41893278	41942092	Gm13307	lncRNA	-
chr4	41941572	41943124	Gm20878	lncRNA	+	XT	chr4	41893278	41942092	Gm13307	lncRNA	-
chr4	42033017	42034726	Gm21093	lncRNA	-	XH	chr4	42034581	42039512	Gm37530	lncRNA	+
chr4	42091207	42092287	Gm3893	protein_coding	+	SD	chr4	42055152	42089708	Gm3892	lncRNA	+
chr4	42132559	42134171	Ccl19-ps3	unprocessed_pseudogene	+	XO	chr4	42121613	42153435	Gm13299	lncRNA	-
chr4	42216908	42235604	Gm13301	transcribed_unprocessed_pseudogene	+	SD	chr4	42206998	42235313	Gm17167	lncRNA	+
chr4	42236859	42239182	Gm5859	unprocessed_pseudogene	+	SD	chr4	42206998	42235313	Gm17167	lncRNA	+
chr4	42239725	42240202	Gm17081	unprocessed_pseudogene	+	SD	chr4	42206998	42235313	Gm17167	lncRNA	+
chr4	42294267	42294855	Gm21953	protein_coding	+	XT	chr4	42293436	42293841	Gm21980	lncRNA	-
chr4	43492900	43495921	Ccdc107	lncRNA	+	XH	chr4	43492783	43493063	Rmrp	lncRNA	-
chr4	43506966	43513729	Car9	lncRNA	+	XH	chr4	43504428	43508747	Gm12454	lncRNA	-
chr4	43583216	43584494	Msmp	protein_coding	-	XH	chr4	43588072	43608755	Gm12472	lncRNA	+
chr4	43631425	43631557	Gm25262	lncRNA	+	XH	chr4	43631539	43641533	Gm12473	lncRNA	-
chr4	44967769	44971096	Gm12493	lncRNA	+	XH	chr4	44970576	44978319	Gm12679	lncRNA	-
chr4	46327296	46327765	Gm12447	processed_pseudogene	+	XO	chr4	46300007	46345515	Gm12446	lncRNA	-
chr4	46343609	46346412	Foxe1	lncRNA	+	XT	chr4	46300007	46345515	Gm12446	lncRNA	-
chr4	47920755	47920897	Gm22670	snoRNA	+	XO	chr4	47827224	47927365	Gm38343	lncRNA	-
chr4	48896499	48896623	Gm23746	snoRNA	+	SU	chr4	48898593	48963237	Gm12436	lncRNA	+
chr4	54669622	54670192	Gm12477	processed_pseudogene	-	XO	chr4	54646542	54689451	Gm12478	lncRNA	+
chr4	55163008	55163616	Gm12509	processed_pseudogene	+	XO	chr4	55131208	55279479	Gm12514	lncRNA	-
chr4	55254740	55255219	Gm12508	processed_pseudogene	+	XO	chr4	55131208	55279479	Gm12514	lncRNA	-
chr4	55282064	55282280	Gm12512	processed_pseudogene	-	SD	chr4	55131208	55279479	Gm12514	lncRNA	-
chr4	55408956	55409307	Gm12513	processed_pseudogene	-	SU	chr4	55410443	55418842	Gm12505	lncRNA	-
chr4	55469025	55469159	Gm22150	snoRNA	-	SD	chr4	55450684	55465814	Gm12510	lncRNA	-
chr4	57762607	57762710	Gm24277	snRNA	+	XO	chr4	57757739	57763901	Gm12526	lncRNA	-
chr4	60498012	60501960	Mup1	protein_coding	-	XH	chr4	60502841	60521169	Gm13773	lncRNA	+
chr4	60517461	60520175	Mup-ps6	transcribed_unprocessed_pseudogene	+	SD	chr4	60502841	60521169	Gm13773	lncRNA	+
chr4	61778324	61782269	Mup19	protein_coding	-	XH	chr4	61783123	61801286	Gm13775	lncRNA	+
chr4	61797482	61800237	Mup-ps16	unprocessed_pseudogene	+	SD	chr4	61783123	61801286	Gm13775	lncRNA	+
chr4	62083476	62087342	Mup3	protein_coding	-	XT	chr4	62088288	62090524	Gm12909	lncRNA	+
chr4	63631682	63631788	Gm24234	snRNA	-	XH	chr4	63634421	63639440	Gm11482	lncRNA	+
chr4	71072673	71073143	Gm11227	processed_pseudogene	+	XH	chr4	71075109	71131133	Gm11228	lncRNA	-
chr4	82061112	82061221	Gm22402	miRNA	-	SD	chr4	82033312	82065890	Gm11264	lncRNA	-
chr4	82061112	82061221	Gm22402	miRNA	-	XH	chr4	82065431	82102808	Gm5860	lncRNA	+
chr4	88718292	88722465	Klhl9	protein_coding	-	SU	chr4	88722757	88757579	Gm13274	lncRNA	-
chr4	88721805	88722842	Gm26566	lncRNA	+	XH	chr4	88722757	88757579	Gm13274	lncRNA	-
chr4	88754868	88755416	Gm13271	protein_coding	+	XO	chr4	88722757	88757579	Gm13274	lncRNA	-
chr4	88755195	88755590	Gm16686	protein_coding	-	SD	chr4	88722757	88757579	Gm13274	lncRNA	-
chr4	88757844	88758380	Gm13286	unprocessed_pseudogene	+	XH	chr4	88722757	88757579	Gm13274	lncRNA	-
chr4	88758171	88758570	Gm10583	pseudogene	-	SD	chr4	88722757	88757579	Gm13274	lncRNA	-
chr4	88760119	88761581	Gm13283	protein_coding	+	XH	chr4	88722757	88757579	Gm13274	lncRNA	-
chr4	88761101	88761500	Gm10582	pseudogene	-	SD	chr4	88722757	88757579	Gm13274	lncRNA	-
chr4	88910557	88910662	Mir31	miRNA	-	SD	chr4	88909855	88938521	Gm49890	lncRNA	-
chr4	89442217	89444644	Gm12608	processed_pseudogene	-	XO	chr4	89421848	89463487	Gm12610	lncRNA	+
chr4	89445219	89445367	Gm27580	misc_RNA	+	SD	chr4	89421848	89463487	Gm12610	lncRNA	+
chr4	93545150	93545277	Gm23443	snoRNA	-	SD	chr4	93453258	93671070	Gm12649	lncRNA	-
chr4	93599186	93599495	Gm12640	processed_pseudogene	+	XO	chr4	93453258	93671070	Gm12649	lncRNA	-
chr4	93600979	93601085	Gm24796	snRNA	+	XO	chr4	93453258	93671070	Gm12649	lncRNA	-
chr4	94098290	94098418	Gm23836	snoRNA	+	XO	chr4	94089576	94425588	Gm12648	lncRNA	-
chr4	94395658	94396244	Gm12654	processed_pseudogene	+	XO	chr4	94089576	94425588	Gm12648	lncRNA	-
chr4	95039162	95039625	Gm12704	processed_pseudogene	-	SD	chr4	95029963	95048370	Gm12703	lncRNA	-
chr4	95049034	95052222	Jun	lncRNA	-	XH	chr4	95051534	95167318	Junos	lncRNA	+
chr4	95049034	95052222	Jun	protein_coding	-	SD	chr4	95029963	95048370	Gm12703	lncRNA	-
chr4	95062650	95062763	n-R5s189	rRNA	+	SD	chr4	95051534	95167318	Junos	lncRNA	+
chr4	99656299	99658622	Foxd3	protein_coding	+	XT	chr4	99653607	99654983	Gm12688	lncRNA	-
chr4	99657742	99657830	Gm23366	miRNA	+	XH	chr4	99653607	99654983	Gm12688	lncRNA	-
chr4	99657742	99657830	Gm23366	miRNA	+	XH	chr4	99662541	99712972	Gm12682	lncRNA	-
chr4	101346945	101347027	Mir101a	miRNA	-	SD	chr4	101346531	101356735	E130102H24Rik	lncRNA	-
chr4	101362177	101362890	Gm12795	processed_pseudogene	-	XO	chr4	101353783	101399181	0610043K17Rik	lncRNA	+
chr4	103471859	103471959	Gm23064	miRNA	+	SD	chr4	103382500	103492040	Gm12718	lncRNA	+
chr4	103543374	103544727	Gm12716	processed_pseudogene	-	SD	chr4	103538845	103550682	Gm12720	lncRNA	-
chr4	106098924	106099282	Gm12727	processed_pseudogene	+	XO	chr4	106088714	106105068	Gm12729	lncRNA	-
chr4	106257031	106257298	Gm12731	processed_pseudogene	+	SD	chr4	106241216	106290026	Gm12724	lncRNA	+
chr4	107688128	107688678	Gm12899	processed_pseudogene	+	SU	chr4	107689701	107758985	1700047F07Rik	lncRNA	+
chr4	107697834	107697954	Gm25123	miRNA	-	XO	chr4	107689701	107758985	1700047F07Rik	lncRNA	+
chr4	107760025	107760465	Gm12906	processed_pseudogene	-	XH	chr4	107689701	107758985	1700047F07Rik	lncRNA	+
chr4	109629582	109630725	Gm12803	processed_pseudogene	+	SD	chr4	109569214	109656791	Gm12811	lncRNA	+
chr4	114821722	114856166	Gm12830	protein_coding	+	XO	chr4	114817161	114902859	9130410C08Rik	lncRNA	-
chr4	114844985	114845117	Gm23230	snRNA	-	SD	chr4	114817161	114902859	9130410C08Rik	lncRNA	-
chr4	114906282	114908873	Foxd2	protein_coding	-	XH	chr4	114909257	114921967	Foxd2os	lncRNA	+
chr4	114925147	114926013	Foxe3	protein_coding	-	XH	chr4	114909257	114921967	Foxd2os	lncRNA	+
chr4	116173372	116174290	1700042G07Rik	protein_coding	+	SU	chr4	116176246	116177732	Gm12951	lncRNA	+
chr4	116551633	116555936	Tmem69	protein_coding	-	XI	chr4	116551740	116552627	Gm12953	lncRNA	+
chr4	116596654	116600266	Ccdc17	lncRNA	+	XT	chr4	116589733	116597630	C530005A16Rik	lncRNA	-
chr4	116819904	116821707	Hpdl	protein_coding	-	XH	chr4	116824903	116830603	Gm12996	lncRNA	+
chr4	117210844	117210959	Gm23287	snRNA	+	XH	chr4	117213334	117213782	1700012C08Rik	lncRNA	-
chr4	117866524	117872557	Ccdc24	protein_coding	-	SD	chr4	117835299	117868558	Gm17114	lncRNA	-
chr4	117884326	117887333	Atp6v0b	lncRNA	-	XH	chr4	117883621	117885995	Gm12841	lncRNA	+
chr4	118980318	118980442	Gm24352	snoRNA	+	SD	chr4	118971297	118999458	Gm12861	lncRNA	+
chr4	118980318	118980442	Gm24352	snoRNA	+	XH	chr4	118984058	118997198	Gm12865	lncRNA	-
chr4	118987014	118988019	Gm12864	processed_pseudogene	+	SD	chr4	118971297	118999458	Gm12861	lncRNA	+
chr4	118987014	118988019	Gm12864	processed_pseudogene	+	XO	chr4	118984058	118997198	Gm12865	lncRNA	-
chr4	119129779	119129844	Mir1957a	miRNA	+	XH	chr4	119130292	119131001	Gm12867	lncRNA	-
chr4	119129779	119129844	Mir1957a	miRNA	+	XH	chr4	119133749	119138801	Gm12868	lncRNA	-
chr4	123116266	123118000	Oxct2b	lncRNA	+	XT	chr4	123113349	123116764	Gm17244	lncRNA	-
chr4	123838104	123839502	Gm12904	processed_pseudogene	+	XO	chr4	123833622	123859513	1700121C08Rik	lncRNA	-
chr4	123902129	123903634	D130007C19Rik	pseudogene	-	SU	chr4	123905062	123918023	Gm12905	lncRNA	-
chr4	123902422	123902965	Gm12903	processed_pseudogene	+	XH	chr4	123905062	123918023	Gm12905	lncRNA	-
chr4	123904832	123912269	Mycbp	lncRNA	+	XH	chr4	123905062	123918023	Gm12905	lncRNA	-
chr4	123917504	123918022	4930535I16Rik	protein_coding	-	SD	chr4	123905062	123918023	Gm12905	lncRNA	-
chr4	124335578	124335681	Gm22983	snRNA	-	SD	chr4	124326308	124332508	4933435F18Rik	lncRNA	-
chr4	124609931	124610803	3100002H09Rik	protein_coding	-	SD	chr4	124528924	124657169	Gm2164	lncRNA	-
chr4	124656807	124660655	Pou3f1	lncRNA	+	XT	chr4	124528924	124657169	Gm2164	lncRNA	-
chr4	124731694	124731802	Mir697	miRNA	+	XH	chr4	124735730	124751354	Gm12915	lncRNA	-
chr4	124735839	124735948	Gm24721	miRNA	+	XO	chr4	124735730	124751354	Gm12915	lncRNA	-
chr4	124743781	124743889	Mir698	miRNA	+	XO	chr4	124735730	124751354	Gm12915	lncRNA	-
chr4	126147744	126149875	Eva1b	protein_coding	+	SD	chr4	126145979	126147735	Gm12946	lncRNA	+
chr4	126322121	126325688	Tekt2	protein_coding	-	XI	chr4	126323599	126325237	Gm12945	lncRNA	+
chr4	127046383	127046602	Gm12941	processed_pseudogene	+	SD	chr4	127033731	127049398	Gm12940	lncRNA	+
chr4	127531622	127532885	1700080G11Rik	lincRNA	+	SD	chr4	127474848	127570502	A630031M04Rik	lncRNA	+
chr4	128260212	128260957	Hmgb4	protein_coding	-	XH	chr4	128261044	128262990	Hmgb4os	lncRNA	+
chr4	128868393	128869396	Gm12969	processed_pseudogene	-	XO	chr4	128846197	128873698	Gm12968	lncRNA	+
chr4	129489014	129491022	Tssk3	protein_coding	-	SU	chr4	129491969	129509746	Gm12979	lncRNA	-
chr4	129491190	129491956	Fam229a	protein_coding	+	XH	chr4	129491969	129509746	Gm12979	lncRNA	-
chr4	130766331	130766413	Gm24091	snoRNA	+	SD	chr4	130758563	130762379	Gm12971	lncRNA	+
chr4	131902790	131903311	Gm12978	transcribed_processed_pseudogene	-	SD	chr4	131899478	131920029	Gm12992	lncRNA	-
chr4	131921771	131923140	Tmem200b	protein_coding	+	XH	chr4	131899478	131920029	Gm12992	lncRNA	-
chr4	131921771	131923140	Tmem200b	protein_coding	+	XT	chr4	131920816	131921528	Gm50475	lncRNA	-
chr4	132270080	132270213	Rnu11	snRNA	-	XH	chr4	132265708	132268841	Gm28874	lncRNA	+
chr4	132309465	132309600	Snora16a	snoRNA	+	SD	chr4	132308623	132311024	Snhg12	lncRNA	+
chr4	132309941	132310069	Snora44	snoRNA	+	SD	chr4	132308623	132311024	Snhg12	lncRNA	+
chr4	132310240	132310369	Snora61	snoRNA	+	SD	chr4	132308623	132311024	Snhg12	lncRNA	+
chr4	132310691	132310764	Snord99	snoRNA	+	SD	chr4	132308623	132311024	Snhg12	lncRNA	+
chr4	132352322	132352526	Snora73b	snoRNA	-	SD	chr4	132348014	132353686	Snhg3	lncRNA	-
chr4	132352322	132352526	Snora73b	snoRNA	-	XO	chr4	132351772	132353382	Gm17300	lncRNA	+
chr4	132352775	132352979	Snora73a	snoRNA	-	SD	chr4	132348014	132353686	Snhg3	lncRNA	-
chr4	132352775	132352979	Snora73a	snoRNA	-	XO	chr4	132351772	132353382	Gm17300	lncRNA	+
chr4	132530555	132533659	Atpif1	protein_coding	-	XI	chr4	132532687	132533601	Gm12999	lncRNA	+
chr4	135307781	135307970	Gm12982	processed_pseudogene	-	XO	chr4	135307349	135309519	Gm12984	lncRNA	+
chr4	135541888	135573630	Grhl3	protein_coding	+	SD	chr4	135626655	135630198	1700029M20Rik	lncRNA	+
chr4	136347286	136350334	9130020K20Rik	lincRNA	+	XI	chr4	136347847	136349441	Gm27022	lncRNA	-
chr4	137116709	137117582	1700037C06Rik	lincRNA	-	SU	chr4	137117143	137118143	Gm13001	lncRNA	-
chr4	138394092	138396528	Fam43b	lncRNA	-	XH	chr4	138395198	138397714	AB041806	lncRNA	+
chr4	141346164	141346240	Gm25690	miRNA	+	SU	chr4	141347814	141350853	Gm13074	lncRNA	+
chr4	141404353	141416014	Clcnkb	lncRNA	-	XT	chr4	141398829	141411191	Gm13075	lncRNA	+
chr4	141613376	141618633	Tmem82	protein_coding	-	XI	chr4	141614026	141615604	AI507597	lncRNA	+
chr4	145446740	145450888	Gm13230	transcribed_unprocessed_pseudogene	+	SD	chr4	145410245	145449756	Platr16	lncRNA	+
chr4	146178124	146178766	Gm13170	processed_pseudogene	+	XO	chr4	146167522	146205732	Gm13165	lncRNA	-
chr4	146263559	146264190	Gm13168	processed_pseudogene	+	SD	chr4	146251829	146278434	Gm13166	lncRNA	+
chr4	146264521	146264895	Vmn2r-ps17	unprocessed_pseudogene	+	SD	chr4	146251829	146278434	Gm13166	lncRNA	+
chr4	148000722	148002079	Nppa	lncRNA	+	XH	chr4	148001091	148004014	Gm13054	lncRNA	-
chr4	148068031	148068492	Gm13202	processed_pseudogene	-	SU	chr4	148071392	148075420	Gm13201	lncRNA	-
chr4	150068454	150068555	Mir34a	miRNA	+	SU	chr4	150068539	150070997	Gm37795	lncRNA	+
chr4	150847113	150847507	Rps15a-ps3	processed_pseudogene	+	XO	chr4	150828225	150854949	1700045H11Rik	lncRNA	-
chr4	152201807	152202142	Gm27500	misc_RNA	-	XH	chr4	152203926	152204467	Gm13096	lncRNA	+
chr4	154960923	154962371	Hes5	lncRNA	+	XH	chr4	154960770	154961678	Gm20421	lncRNA	-
chr4	155839680	155844088	Mxra8	lncRNA	+	XH	chr4	155839492	155840178	Mxra8os	lncRNA	-
chr4	156013843	156016612	Tnfrsf4	protein_coding	+	XH	chr4	156018556	156022660	Gm37090	lncRNA	-
chr4	156018556	156022660	RP23-118E21.11	TEC	-	SU	chr4	156022008	156031643	Gm16008	lncRNA	-
chr4	156023058	156023158	Gm25982	snRNA	-	SD	chr4	156022008	156031643	Gm16008	lncRNA	-
chr4	156023058	156023158	Gm25982	snRNA	-	SD	chr4	156018556	156022660	Gm37090	lncRNA	-
chr4	156026164	156028895	Tnfrsf18	protein_coding	+	XO	chr4	156022008	156031643	Gm16008	lncRNA	-
chr4	156053905	156053987	Mir429	miRNA	-	SD	chr4	156052715	156059802	Gm13648	lncRNA	-
chr4	156054896	156054985	Mir200a	miRNA	-	SD	chr4	156052715	156059802	Gm13648	lncRNA	-
chr4	156055674	156055763	Mir200b	miRNA	-	SD	chr4	156052715	156059802	Gm13648	lncRNA	-
chr4	156199424	156200818	Isg15	protein_coding	-	XH	chr4	156203270	156210563	AW011738	lncRNA	+
chr5	6410438	6410530	Gm24686	snRNA	+	SU	chr5	6414399	6427065	Gm40263	lncRNA	+
chr5	7857108	7857847	Gm8802	processed_pseudogene	+	XO	chr5	7680108	7960346	Gm30835	lncRNA	-
chr5	7888685	7888793	Gm22196	miRNA	+	XO	chr5	7680108	7960346	Gm30835	lncRNA	-
chr5	8055139	8055553	Gm15730	processed_pseudogene	+	XH	chr5	8037294	8052707	Gm15731	lncRNA	-
chr5	8997286	8997427	Gm27941	lncRNA	-	XT	chr5	8997159	8997389	Gm37153	lncRNA	+
chr5	8997286	8997427	Gm27941	misc_RNA	-	SU	chr5	8998402	8999669	Gm15611	lncRNA	-
chr5	9260945	9261388	Gm7332	processed_pseudogene	-	SU	chr5	9264222	9266022	Gm15734	lncRNA	-
chr5	10235871	10236971	Gm28685	processed_pseudogene	-	XO	chr5	10187866	10237890	Gm10482	lncRNA	+
chr5	13768662	13771887	Gm6647	unprocessed_pseudogene	+	XO	chr5	13748111	13808343	4930568A13Rik	lncRNA	-
chr5	13791619	13796820	Speer3	protein_coding	+	XO	chr5	13748111	13808343	4930568A13Rik	lncRNA	-
chr5	15619064	15623864	Speer4d	protein_coding	+	SD	chr5	15516489	15656679	Gm21847	lncRNA	+
chr5	15652286	15657059	4930572O03Rik	lncRNA	-	XT	chr5	15516489	15656679	Gm21847	lncRNA	+
chr5	15709501	15714271	Speer4c	protein_coding	-	XO	chr5	15680710	15714596	Speer4cos	lncRNA	+
chr5	21951858	21952499	Dnaja1-ps	processed_pseudogene	-	SU	chr5	21956094	21957986	Gm19666	lncRNA	-
chr5	21951858	21952499	Dnaja1-ps	processed_pseudogene	-	XO	chr5	21910931	21954014	Gm10475	lncRNA	+
chr5	22612628	22613182	Rpl17-ps5	processed_pseudogene	-	XO	chr5	22550432	22807850	6030443J06Rik	lncRNA	+
chr5	22645119	22645183	Gm24512	snRNA	-	XO	chr5	22550432	22807850	6030443J06Rik	lncRNA	+
chr5	23674289	23674381	Gm24009	rRNA	-	SU	chr5	23674739	23675546	Gm43566	lncRNA	-
chr5	23710991	23711061	Mir3096	snoRNA	-	SD	chr5	23698296	23712667	AI506816	lncRNA	-
chr5	23836167	23836321	Gm22054	snRNA	-	SD	chr5	23815618	23831897	4933427G23Rik	lncRNA	-
chr5	23852210	23852280	Snord93	snoRNA	+	SD	chr5	23850597	23855038	2700038G22Rik	lncRNA	+
chr5	24364810	24384474	Nos3	protein_coding	+	XI	chr5	24366192	24383614	Gm15587	lncRNA	-
chr5	24445458	24447854	Tmub1	protein_coding	-	SU	chr5	24449608	24451709	Gm10472	lncRNA	-
chr5	24445458	24447854	Tmub1	protein_coding	-	XT	chr5	24447908	24448489	2310074N15Rik	lncRNA	+
chr5	28165694	28172166	En2	protein_coding	+	XI	chr5	28168476	28168840	Gm43610	lncRNA	-
chr5	28456815	28467101	Shh	lncRNA	-	XH	chr5	28458274	28933995	9530036O11Rik	lncRNA	+
chr5	28466374	28480973	Gm26894	lincRNA	+	SD	chr5	28458274	28933995	9530036O11Rik	lncRNA	+
chr5	31138063	31138829	Ucn	protein_coding	-	SD	chr5	31135753	31137344	Gm15469	lncRNA	-
chr5	31485859	31488476	4930548H24Rik	lncRNA	+	XH	chr5	31486629	31495179	4930566F21Rik	lncRNA	-
chr5	31624439	31697627	Rbks	protein_coding	-	XO	chr5	31596938	31701972	Gm43809	lncRNA	+
chr5	31667231	31667340	Mir3473e	miRNA	-	XO	chr5	31596938	31701972	Gm43809	lncRNA	+
chr5	33653216	33657977	Tmem129	lncRNA	-	XH	chr5	33652101	33653255	Gm10459	lncRNA	+
chr5	34574151	34574213	Mir7036b	miRNA	+	SU	chr5	34575088	34575556	Gm42867	lncRNA	+
chr5	35554184	35555971	Plk-ps1	processed_pseudogene	+	XH	chr5	35551260	35553964	Gm43860	lncRNA	-
chr5	36747374	36748679	Bloc1s4	lncRNA	-	XH	chr5	36748618	36750437	Gm43701	lncRNA	+
chr5	38319509	38322310	Drd5	lncRNA	+	XT	chr5	38317333	38320897	Gm26560	lncRNA	-
chr5	39520976	39521104	Gm25377	snoRNA	-	SD	chr5	39461749	39603574	4930513D17Rik	lncRNA	-
chr5	43549930	43557769	Gm15865	antisense	-	SD	chr5	43549928	43601731	Gm15866	lncRNA	-
chr5	43913173	43913706	Gm7879	processed_pseudogene	+	XH	chr5	43909215	43909885	Gm16015	lncRNA	-
chr5	43943902	43944483	Gm5292	processed_pseudogene	-	SU	chr5	43948120	43948661	Gm43184	lncRNA	-
chr5	43943902	43944483	Gm5292	processed_pseudogene	-	XT	chr5	43948116	43948662	Gm43183	lncRNA	+
chr5	45155011	45169564	4930435H24Rik	protein_coding	-	SD	chr5	45009171	45424402	D5Ertd615e	lncRNA	-
chr5	45434032	45450235	Qdpr	protein_coding	-	XI	chr5	45434389	45450138	Gm42413	lncRNA	+
chr5	45768870	45769664	Gm29036	processed_pseudogene	-	SU	chr5	45770020	45772180	Gm43200	lncRNA	-
chr5	48924116	48924491	Gm10025	pseudogene	+	XH	chr5	48924954	48928740	Gm10048	lncRNA	-
chr5	48927861	48928234	AC102446.1	pseudogene	-	SD	chr5	48924954	48928740	Gm10048	lncRNA	-
chr5	49423841	49424155	Gm19932	processed_pseudogene	+	SU	chr5	49425017	49426783	Gm43670	lncRNA	+
chr5	52135902	52136017	Mir6417	miRNA	-	SU	chr5	52139585	52142573	Gm43176	lncRNA	-
chr5	52343118	52343222	Gm25601	snRNA	-	SD	chr5	52342086	52342360	Gm43179	lncRNA	-
chr5	57608567	57609067	Gm8121	processed_pseudogene	+	XO	chr5	57570082	57720201	4932441J04Rik	lncRNA	-
chr5	57984768	57985194	RP24-231P10.1	sense_intronic	+	SD	chr5	57984212	57985452	Gm37720	lncRNA	+
chr5	64709346	64710695	Gm28712	lincRNA	+	XO	chr5	64708207	64804117	Gm20033	lncRNA	-
chr5	64970318	64970395	Mir574	miRNA	+	SU	chr5	64972650	64974948	Gm43627	lncRNA	+
chr5	65777014	65777207	Gm24346	snoRNA	+	SU	chr5	65778014	65780518	Gm42648	lncRNA	+
chr5	66164556	66164662	Gm22929	snRNA	-	SU	chr5	66166607	66191336	1700126H18Rik	lncRNA	-
chr5	66164556	66164662	Gm22929	snRNA	-	XO	chr5	66151212	66174945	Gm26725	lncRNA	+
chr5	66325740	66326062	Gm23183	misc_RNA	-	SD	chr5	66321005	66323017	Gm43790	lncRNA	-
chr5	67631825	67631919	Gm23617	miRNA	-	SU	chr5	67633663	67635308	Gm42735	lncRNA	-
chr5	73013499	73017376	Gm15847	transcribed_unprocessed_pseudogene	+	SU	chr5	73015199	73017685	Gm42668	lncRNA	+
chr5	74093530	74093650	Snora26	snoRNA	+	SD	chr5	74093060	74095406	Dancr	lncRNA	+
[truncated: 1,137 more rows]
