# Supplementary material for: Panoramic transcriptome analysis and functional screening of long noncoding RNAs in mouse spermatogenesis
Source: HighWire-hosted journal article supplement (doi:10.1101/gr.264333.120), 2020-12-16
Supplement: Supplemental_Table_S4.xlsx.xlsx [file Supplemental_Table_S4.xlsx.xlsx]

## Sheet: Sheet1
Table S4. Differentially expressed genes (DEGs) upon Gm4665 knockdown in rST and elST populations at the single-cell level
DEGs in rST (518)		DEGs in elST (170)
`Spet11		`March11
`March11		1700001K19Rik
`March2		1700010B08Rik
Ropn1		1700010I14Rik
1700003E16Rik		1700011E24Rik
1110017D15Rik		1700012B09Rik
1190005I06Rik		1700018B24Rik
1110004E09Rik		1700020D05Rik
1700001C19Rik		1700021F07Rik
1700001F09Rik		1700025G04Rik
1700001K19Rik		1700041C23Rik
1700001O22Rik		1700086L19Rik
1700003E24Rik		1700097N02Rik
1700003F12Rik		1700120B22Rik
1700006E09Rik		1810044D09Rik
1700006F04Rik		2010109A12Rik
1700008P02Rik		2300009A05Rik
1700009J07Rik		4930401O12Rik
1700009N14Rik		4930405D11Rik
1700010B08Rik		4930538K18Rik
1700010D01Rik		4930544G11Rik
1700010I14Rik		4933438B17Rik
1700012A03Rik		AA467197
1700015G11Rik		Actg1
1700016C15Rik		Actrt3
1700016H13Rik		Acyp1
1700016P04Rik		AK157302
1700018B24Rik		Akap3
1700018L02Rik		Amn1
1700019N19Rik		Aprt
1700020A23Rik		Art3
1700023F02Rik		Atp6ap1l
1700023F06Rik		Atp6v1e2
1700024P04Rik		Atp6v1g1
1700025G04Rik		Atxn7l3b
1700026J12Rik		Bbof1
1700026L06Rik		BC022687
1700027A15Rik		BC048502
1700029B22Rik		Bpifa3
1700029H14Rik		Calm1
1700029P11Rik		Ccdc113
1700030F04Rik		Ccdc173
1700031M16Rik		Ccin
1700034E13Rik		Ccl27a
1700034I23Rik		Ccnb2
1700040L02Rik		Cenpw
1700041C23Rik		Cfap36
1700056E22Rik		Chrac1
1700080E11Rik		Cklf
1700084M14Rik		Clgn
1700092M07Rik		Col22a1
1700097N02Rik		Cox4i1
1700101O22Rik		Cox6b2
1700104B16Rik		Cox6c
1810044D09Rik		Cox7b2
2010109A12Rik		Cox7c
2200002J24Rik		Cox8c
2300009A05Rik		Cst13
2610318N02Rik		Cypt4
2810408A11Rik		Dad1
4921507P07Rik		Ddt
4921530L21Rik		Diablo
4930401O12Rik		Eif2s2
4930405D11Rik		Eif5b
4930428N03Rik		Fbp1
4930449I24Rik		Fhl5
4930503B20Rik		Fkbp1a
4930544D05Rik		Ggnbp1
4930544G11Rik		Ghrl
4930557A04Rik		Gkap1
4930563D23Rik		Glipr1l1
4931417E11Rik		Gm10709
4931428F04Rik		Gm11837
4933402P03Rik		Gm128
4933406M09Rik		Gm13306
4933411K16Rik		Gm21190
4933416C03Rik		Gm28269
4933433C11Rik		Gm3448
4933433G15Rik		Gm34732
4933438B17Rik		Gm4353
4933438K21Rik		Gm4665
AA467197		H2afz
Acrbp		H3f3b
Acsl1		Hagh
Actb		Hsp90aa1
Actg1		Hspa2
Actg2		Itpr3os
Actl9		Izumo4
Actrt2		Jchain
Actrt3		Klk1b9
Acyp1		Lrrc34
Adam6a		Lyar
Adig		Lztfl1
Agpat2		Manf
AI507597		Med28
Aif1		Mesp1
Ak1		Mns1
Akap1		Map7
Akap3		Mt2
Akap4		mt-Co2
Allc		mt-Co3
Amn1		mt-Nd4
Ankrd9		Mum1
Aprt		Myl10
Arpc1a		Nasp
Art3		Ndufc1
Asb17		Nop10
Asb8		Nphp1
Asb9		Npm1
Asns		Nxt1
Atad1		Pabpc1
Atl3		Pbp2
Atp1a4		Phospho2
Atp5k		Prss37
Atp6ap1l		Prss46
Atp6v1e2		Prss52
Atp6v1g1		Psmc3ip
Atxn3		Ptges3
Atxn7l3b		Rbakdn
Aurka		Rnf151
Banf2		Rpl35a
Bbof1		Rpl36al
BC048507		Rpl37a
BC048671		Rpl38
BC061195		Rps21
BC061237		Rps23
BC100451		Rps27
Bcap29		Rps27rt
Bcl2l11		Rps28
Bpifa3		Rps29
Cabs1		Rsph1
Calm1		Rtn3
Calm2		Scp2d1
Calr		Sec61g
Calr3		Shfm1
Capza3		Slc16a7
Car2		Slc22a16
Ccdc169		Slirp
Ccdc183		Smco2
Ccdc185		Snrpc
Ccdc28a		Snrpg
Ccdc38		Sod2
Ccdc39		Spink2
Ccdc54		Srp14
Ccdc57		Suclg1
Ccdc91		Supt20
Ccin		Tap1
Ccnb1		Tbca
Ccsap		Tbpl1
Ccser2		Tcp10c
Cct8l1		Tekt4
Cd320		Tmbim7
Cd46		Tmem97
Cd55		Tmigd3
Cdc42ep3		Tomm7
Cdca3		Trim80
Cdrt4		Trp53tg5
Cdyl		Tuba3a
Cenpf		Tuba3b
Cenpv		Tuba8
Cenpw		Uba52
Cep350		Ubc
Cfap97		Ube2l3
Chchd2		Vdac2
Chchd3		Vps26a
Chn2		Wbp11
Ciapin1		Yjefn3
Cklf		Zfand4.1
Clip4		Zpbp
Clpb		Zpbp2
Cnbd2
Cnot4
Cntn1
Col20a1
Col22a1
Cox4i1
Cox6b2
Cox6c
Cox7b2
Cox8c
Cpxm1
Creb3l4
Cst13
Cst8
Cstl1
Cylc1
Cyp51
Cypt1
Cypt12
Cypt15
Cypt2
Cypt3
Cypt4
Dad1
Dcun1d1
Dcun1d4
Dda1
Ddt
Ddx24
Defb30
Dennd6b
Diablo
Dlgap4
Dnah8
Dnaja1
Dnajb7
Dnajb8
Dnajc9
Dusp3
Dydc1
Dynlt1a
Eif2s2
Eif4h
Emc7
Erh
Erich3
Exosc5
Faiml
Fam134b
Fam166a
Fam198b
Fam216a
Fam50b
Fam71a
Fam71d
Fam71e1
Fam71f1
Fam71f2
Fam78a
Fbxo24
Fbxo39
Fhl5
Fkbp1a
Fndc8
Frat2
Fyttd1
Gabarapl1
Gabarapl2
Galntl5
Gapdhs
Gfra2
Ggnbp1
Ghrl
Gid4
Gkap1
Glt6d1
Glul
Gm10376
Gm13306
Gm136
Gm16226
Gm21190
Gm28269
Gm43786
Gm44006
Gm4665
Gm4787
Gm5795
Gm6760
Gm9047
Gpat4
Gpi1
Gsg1
Gtf2e2
Gtsf1l
H1fnt
H2afb1
H2afz
Habp4
Hagh
Hdac11
Hdgf
Hdgfl1
Hemgn
Hils1
Hk1
Hmgb4
Hnrnpk
Hook1
Hsp90aa1
Hsp90b1
Hspa5
Hyal5
Hypm
Idi1
Ift172
Ip6k1
Ipo5
Iqcf1
Iqcf3
Iqcf6
Irgc1
Isg20l2
Izumo4
Jchain
Kctd16
Kif2b
Kif2c
Klk1b8
Klk1b9
Knstrn
Krcc1
Lamp2
Lelp1
Lemd1
Lnp
Lrrc57
Lyar
Lztfl1
Mad2l2
Map2k7
Map7
Mesp1
Mif4gd
Morn3
Mrfap1
Mrps36
Mrto4
Mt2
mt-Atp6
mt-Co1
mt-Co2
mt-Co3
mt-Cytb
mt-Nd1
mt-Nd2
mt-Nd3
mt-Nd4
Mum1
Myl10
Nabp1
Nasp
Ndufa2
Ndufc1
Ndufs6
Nkapl
Nmt1
Nop10
Nsrp1
Nudt21
Nupr1l
Nxt1
Otub2
Oxct2a
Oxct2b
Pabpc6
Paqr5
Pbp2
Pdia6
Pdpk1
Pdzd9
Pex5l
Pfn3
Phactr1
Phospho2
Pi4k2b
Pkib
Pmis2
Ppia
Ppp3ca
Prdx4
Prdx5
Prkar2a
Prkcd
Prm1
Prm2
Prm3
Prss37
Prss46
Prss52
Prss55
Prss58
Psip1
Psmc3ip
Psme3
Psmf1
Psph
Ptges3
Pwwp2b
Rad21
Rangap1
Rasl2-9
Rbakdn
Rcc1
Rexo1
Rfx8
Rnf133
Rnf138
Rnf148
Rnf151
Ropn1
Rora
Rp9
Rpl35a
Rpl36al
Rpl37
Rpl37a
Rpl38
Rpl39l
Rpl4
Rpl9
Rps15a
Rps21
Rps23
Rps27
Rps27a
Rps28
Rps29
Rsph1
Rsph9
Rtn3
Samd4
Saxo1
Scamp1
Scp2d1
Sec61g
Sh3bp5
Sh3d21
Sh3rf2
Shfm1
Skp2
Slc16a7
Slc22a16
Slc2a3
Slfnl1
Slirp
Smcp
Smim14
Smim23
Smpd5
Snrpc
Snrpf
Snrpg
Son
Spanxn4
Spata18
Spata19
Spata20
Spata25
Spata3
Spata31d1b
Spem1
Spert
Spink2
Sppl2c
Spz1
Srp14
Srpk2
Srrm2
Ssx2ip
St13
Sufu
Sun3
Tbc1d21
Tbpl1
Tcp10c
Tctex1d1
Tekt5
Tepp
Tex29
Tex35
Tex37
Tfam
Thegl
Tm2d2
Tmco2
Tmco5b
Tmem132cos
Tmem144
Tmem191c
Tmem205
Tmem56
Tmem97
Tmigd3
Tmod1
Tnfaip2
Tnp1
Tnp2
Tob1
Tomm7
Tor1aip1
Tpm3
Tppp2
Tra2b
Trim36
Trim80
Trp53tg5
Tsks
Tspan6
Tssk3
Tssk6
Ttc24
Tuba3b
Tuba4a
Tuba8
Txndc2
Uba52
Ubc
Ube2n
Ube4bos3
Ubl4b
Ubr7
Uqcr10
Vasp
Vhl
Vimp
Vwa3b
Wbp11
Wbscr25
Wbscr28
Ybx3
Ywhaz
Zdbf2
Zfand4.1
Zfand6
Zmynd10
Zpbp2
0610009L18Rik
