# Supplementary material for: Panoramic transcriptome analysis and functional screening of long noncoding RNAs in mouse spermatogenesis
Source: HighWire-hosted journal article supplement (doi:10.1101/gr.264333.120), 2020-12-16
Supplement: Supplemental_Table_S5.xlsx.xlsx [file Supplemental_Table_S5.xlsx.xlsx]

## Sheet: MACS_LncRNA_Input
Table S5. Analysis of the chromatin fragments binding to Gm4665 by ChIRP-seq
chr	start	end	length	abs_summit	pileup	Gm4665_Input_1_fold_enrichment	Gm4665_Input_2_fold_enrichment	Gm4665_Input_3_fold_enrichment
GL456212.1	898	1513	616	1112	19	6.81948	5.44181	6.8184
JH792829.1	1279	1953	675	1722	30	7.76274	7.48722	11.5143
JH792828.1	1403	1994	592	1607	58	6.95461	5.34289	14.1605
JH584293.1	1245	2130	886	1611	30	9.55294	8.16271	9.31612
GL456372.1	2427	2998	572	2666	57	14.6751	13.6045	8.94829
JH584304.1	3682	4080	399	3905	133	2.31533	2.08507	2.21233
chrM	5734	7128	1395	6671	455	3.33418	2.89872	3.81257
KB469738.2	6254	6731	478	6420	21	5.50904	7.14237	5.34593
GL456213.1	7882	8156	275	7975	20	7.16045	4.76158	6.16838
JH792829.1	11258	11602	345	11449	34	11.9341	8.84293	16.0378
JH792827.1	11445	12201	757	11939	96	11.1048	5.95866	10.7279
JH584304.1	12630	13185	556	12825	161	5.50316	4.32898	5.29664
chrM	14557	16255	1699	15544	403	2.27461	1.25685	2.65309
chrM	14557	16255	1699	15544	403	2.27461	1.85888	2.65309
JH584298.1	14713	15296	584	14926	35	7.59207	9.52316	10.2806
JH584304.1	15565	16718	1154	16074	474	13.2545	10.0458	12.1449
GL456213.1	16051	16540	490	16286	35	12.2751	5.78192	9.86941
GL456233.1	16630	17161	532	16999	15	5.45558	5.44181	6.99083
JH584294.1	18847	19359	513	18993	31	9.14392	5.3415	3.75281
GL456211.1	23551	23880	330	23674	19	6.81948	4.76158	5.75715
GL456366.1	23675	23945	271	23864	22	7.8424	6.80226	9.04696
GL456212.1	29716	30274	559	29834	46	12.5151	11.2237	12.9198
JH584301.1	30301	31218	918	30525	184	21.8068	46.4208	70.3195
JH792829.1	34092	34367	276	34280	18	6.4785	5.10169	5.17562
JH584301.1	34507	35031	525	34776	72	24.8911	18.7062	23.0286
GL456219.1	34640	35663	1024	35153	94	32.3925	24.148	31.6643
JH584304.1	35465	36652	1188	35994	336	9.98502	8.89308	9.21738
GL456233.1	38936	39504	569	39363	22	7.8424	7.14237	8.63573
JH584293.1	41839	43207	1369	42770	115	24.4633	14.4416	21.7604
GL456212.1	42185	42517	333	42341	40	8.64652	7.13344	17.2715
GL456350.1	43621	44311	691	44070	164	41.3178	45.235	45.2348
GL456210.1	44201	44546	346	44366	30	6.53761	5.15278	5.0978
GL456233.1	46842	47628	787	47386	65	22.5043	17.3457	15.8719
KB469741.1	47356	47661	306	47412	23	8.18337	6.12203	8.2245
KB469741.1	49153	49859	707	49602	43	15.0029	11.2237	13.5704
KB469741.1	51480	52032	553	51722	35	12.2751	9.52316	10.2806
KB469739.1	52431	53203	773	52777	77	23.2017	16.6655	29.197
JH584304.1	55427	55967	541	55735	172	4.68565	3.77365	3.8141
KK082443.1	58169	58474	306	58311	41	7.33799	6.60036	7.65447
GL456212.1	58410	58769	360	58532	23	6.00987	3.34084	5.8242
GL456210.1	60636	61281	646	60876	23	6.07245	4.93908	7.86126
JH584294.1	65267	66071	805	65599	77	24.0364	11.6542	20.8822
KK082443.1	69563	70396	834	70005	141	19.4569	17.5804	16.2088
JH792831.1	70104	70792	689	70607	63	21.8223	16.6655	19.3276
KB469739.1	71026	71335	310	71155	22	7.8424	5.78192	6.5796
GL456210.1	73114	73435	322	73276	23	8.18337	7.48248	10.2806
KB469740.1	74865	75173	309	74929	15	5.45558	4.42147	5.34593
GL456221.1	75175	75537	363	75344	26	8.3203	6.46214	11.5621
GL456350.1	77542	78030	489	77785	29	10.2292	5.10169	5.75715
JH584293.1	86227	86545	319	86360	125	3.55686	3.45343	3.22608
JH584301.1	88321	88938	618	88794	26	9.2063	6.12203	10.2806
JH792826.1	91270	91599	330	91440	15	5.45558	7.8226	5.34593
JH792830.1	93097	93723	627	93285	24	8.52435	6.80226	6.90083
KB469740.1	95250	96045	796	95650	52	18.0716	12.9243	11.1031
GL456221.1	98631	99006	376	98787	48	12.2701	7.75769	9.17984
KB469741.1	102728	103439	712	102985	17	6.13753	7.48248	6.16838
JH584294.1	103055	103609	555	103164	13	4.16441	4.42147	4.48554
JH792826.1	103338	103705	368	103536	29	10.2292	9.86327	8.21311
JH584293.1	103373	104175	803	103826	171	58.6475	42.5141	23.1423
JH792831.1	106228	106609	382	106467	22	5.75945	5.44181	6.55579
KB469739.1	108120	108579	460	108369	12	4.43266	7.8226	5.34593
JH792826.1	112483	112924	442	112680	25	8.86532	6.80226	10.2806
KK082443.1	117688	118736	1049	118049	136	14.8398	16.166	31.6669
JH584294.1	120670	121049	380	120870	28	7.26192	8.25504	4.37828
JH792827.1	124673	125026	354	124852	60	13.6049	7.73351	13.6898
KB469741.1	126312	127020	709	126558	38	13.298	10.8836	16.0378
KB469739.1	127157	127848	692	127476	56	19.4355	17.0056	18.9164
KK082442.1	130231	130585	355	130461	34	11.9341	9.52316	7.40205
KK082441.1	132105	132454	350	132242	23	6.00987	5.3908	4.24816
JH792827.1	131932	132477	546	132284	19	6.31911	4.19285	6.5796
JH792830.1	135460	135781	322	135593	30	10.5702	6.80226	7.40205
JH584293.1	137270	137655	386	137401	22	7.8424	6.80226	6.16838
JH792832.1	137541	137849	309	137646	35	11.0937	11.904	11.1031
GL456212.1	142977	143471	495	143236	45	8.9613	3.86366	5.60882
JH584294.1	146191	146543	353	146364	21	7.50143	5.78192	6.99083
GL456350.1	146668	146949	282	146851	28	8.62628	4.32934	7.7656
JH584293.1	148130	148678	549	148330	40	4.52062	4.36569	4.27131
GL456350.1	149640	151257	1618	150736	71	15.1841	16.3254	21.3837
GL456350.1	149640	151257	1618	150736	71	15.1841	9.18673	21.3837
GL456210.1	151927	152263	337	152086	35	11.0937	8.84293	7.13987
GL456211.1	157698	158249	552	158050	48	8.0101	7.45836	11.5803
JH792828.1	159550	159966	417	159743	37	12.957	8.16271	8.2245
KB469739.1	162679	163140	462	162833	21	7.50143	9.18305	9.45818
JH792829.1	165776	166457	682	166052	45	15.6848	8.77843	15.6266
JH584294.1	166512	167091	580	166617	40	13.9799	9.52316	11.3864
JH792830.1	167296	167658	363	167481	21	7.50143	5.78192	6.99083
KB469740.1	175430	176289	860	175803	27	8.62846	7.78671	8.2245
GL456221.1	177039	177577	539	177406	47	12.0197	8.25504	17.5508
GL456350.1	193739	194659	921	193985	124	38.0739	27.0012	27.754
KB469738.2	194415	194989	575	194754	44	15.3438	8.50282	11.9255
JH792826.1	205541	206012	472	205731	42	14.6619	8.84293	9.45818
JH584293.1	206360	206813	454	206551	33	9.55422	4.30689	6.47133
KB469742.1	207241	208487	1247	208007	103	35.4613	15.6452	42.3562
JH792829.1	210274	211026	753	210678	66	19.9297	12.9243	22.2062
KB469740.1	217219	217583	365	217444	19	6.16319	4.76158	6.99083
GL456211.1	223988	224645	658	224232	66	15.4168	7.04468	8.33958
JH792829.1	224453	225432	980	224771	51	17.7306	18.026	17.2715
JH792828.1	232184	232448	265	232267	12	4.43266	4.76158	5.75715
JH792830.1	234080	234404	325	234216	26	9.2063	5.44181	6.5796
JH792828.1	251477	252602	1126	252010	48	7.85444	4.00697	6.2625
KB469742.1	291424	291718	295	291592	23	8.18337	5.78192	9.86941
JH792832.1	293660	293961	302	293795	21	7.50143	6.80226	6.5796
KK082441.1	297478	298344	867	297831	24	8.52435	8.50282	12.748
JH792832.1	298002	298317	316	298086	28	9.88824	7.48248	9.45818
JH792828.1	303356	303659	304	303477	19	6.81948	5.78192	4.9347
KK082443.1	312222	313520	1299	312692	121	41.1026	27.8893	32.4868
JH792829.1	315564	316057	494	315854	26	9.2063	5.44181	5.34593
JH792826.1	334284	334592	309	334432	30	6.53761	7.52666	11.5143
JH792828.1	358638	359339	702	358887	31	10.9112	10.8836	11.5143
JH792828.1	380089	381011	923	380553	69	23.8682	15.9853	18.9164
KB469742.1	411178	411499	322	411336	28	9.88824	5.98978	9.86941
KB469742.1	413555	414387	833	414040	56	19.4355	10.8836	14.8041
KB469742.1	473469	474283	815	473859	72	24.8911	15.9853	22.2062
chrY	690292	690689	398	690526	22	7.08766	7.48248	3.39853
KB469742.1	729648	729948	301	729720	23	8.18337	5.44181	4.83058
KB469742.1	757760	758646	887	758176	69	23.8682	13.8393	22.2062
KB469742.1	775413	775684	272	775575	18	6.4785	5.44181	7.40205
KB469742.1	781748	782011	264	781809	16	5.79656	4.42147	6.5796
chrY	806886	807564	679	807086	86	29.6647	26.1887	30.4307
KB469742.1	1010034	1010425	392	1010207	35	12.2751	10.8836	14.8041
chrY	1064761	1065657	897	1064993	21	7.50143	6.46214	7.40205
chrY	1274025	1274447	423	1274247	45	15.6848	6.80226	11.5143
chrY	2367671	2368432	762	2367973	70	24.2092	20.0667	19.7388
chrY	2741360	2741791	432	2741607	36	12.616	7.18774	12.748
chr9	3000324	3000608	285	3000447	512	1.39518	1.3692	1.61393
chr7	3001453	3001991	539	3001593	55	6.60098	5.36356	9.6069
chr5	3010667	3011132	466	3010872	25	4.16766	4.49129	7.62056
chr12	3011605	3012431	827	3011994	61	21.1404	15.9853	16.0378
chr18	3015463	3015924	462	3015725	27	9.18964	6.88825	11.1031
chr8	3020679	3021204	526	3021034	27	7.01151	7.48248	7.24587
chr19	3033449	3033768	320	3033564	27	7.01151	6.80226	6.16838
chr19	3038008	3038273	266	3038232	14	5.11461	4.08135	4.9347
chr13	3045050	3045677	628	3045449	35	12.2751	7.48722	5.94743
chr12	3047319	3048042	724	3047795	21	7.50143	6.12203	4.52348
chr5	3049007	3049947	941	3049357	36	11.4019	18.3661	20.15
chr18	3051283	3051621	339	3051474	26	9.2063	4.54952	7.24587
chr3	3055023	3055569	547	3055328	36	9.26521	11.5638	12.3368
chr1	3059040	3059495	456	3059264	35	11.3744	7.14237	7.59091
chr9	3060806	3061577	772	3061260	60	15.2751	14.2847	15.2153
chr6	3061429	3061796	368	3061589	24	8.52435	6.80226	5.34593
chr2	3065915	3066235	321	3066009	22	7.8424	6.12203	6.16838
chr4	3070138	3070450	313	3070287	19	6.12856	5.12723	7.83397
chr18	3071851	3072147	297	3071968	28	9.88824	6.46214	5.75715
chr15	3079255	3079812	558	3079592	21	7.50143	9.86327	5.34593
chr17	3079541	3079937	397	3079754	33	4.86627	6.1641	5.58125
chr6	3082183	3082449	267	3082273	20	7.16045	4.79182	6.16838
chr8	3082513	3083139	627	3082740	44	15.3438	10.8836	13.5704
chr9	3085827	3086804	978	3086203	70	24.2092	17.3457	30.0194
chr12	3096479	3096759	281	3096566	24	8.52435	7.8226	7.40205
chr17	3097337	3098569	1233	3097931	137	47.0544	25.2507	37.6095
chr13	3099996	3100594	599	3100219	37	9.51562	13.9446	12.3368
chr19	3119762	3120099	338	3119884	25	8.86532	7.14237	10.2806
chr4	3120246	3120511	266	3120383	17	6.13753	6.46214	5.75715
chr2	3121956	3122803	848	3122371	53	18.4126	14.6249	13.5941
chr13	3126724	3127021	298	3126822	21	6.7795	7.8226	3.36242
chr18	3133057	3133485	429	3133249	26	6.7611	5.44181	7.40205
chr19	3138587	3139362	776	3138997	41	12.9427	10.2034	12.3368
chr15	3141743	3142050	308	3141948	33	11.5931	6.46214	9.86941
chr5	3144526	3144840	315	3144669	20	7.16045	5.3908	7.40205
chr11	3147898	3148844	947	3148401	38	11.2072	10.2236	8.21311
chr3	3150523	3151422	900	3151106	63	21.8223	20.0667	24.2623
chr6	3154179	3154699	521	3154440	16	5.79656	5.10169	7.40205
chr18	3155069	3155339	271	3155181	18	6.4785	7.14237	5.52066
chr15	3156294	3156618	325	3156421	19	5.00822	5.3908	5.75715
chr19	3156339	3157193	855	3156781	43	15.0029	10.5435	10.0062
chr7	3159692	3160191	500	3159898	40	13.9799	7.48248	7.40205
chr2	3162771	3163418	648	3163005	55	19.0945	17.3457	11.9255
chr11	3168664	3169262	599	3168866	69	12.7501	7.57158	11.4285
chr8	3175686	3179144	3459	3176567	418	142.868	130.263	65.0487
chr8	3175686	3179144	3459	3176567	418	142.868	8.50282	65.0487
chr8	3175686	3179144	3459	3176567	418	142.868	130.263	11.9255
chr8	3175686	3179144	3459	3176567	418	142.868	8.50282	11.9255
chr6	3184787	3185146	360	3184952	33	7.17028	3.61728	4.30132
chr12	3187736	3188441	706	3187993	69	23.8682	9.52316	14.8041
chr1	3188934	3189217	284	3189064	21	7.50143	4.49233	5.75715
chr9	3190980	3191280	301	3191163	23	6.00987	6.63891	7.81328
chr2	3194301	3195151	851	3194680	47	16.3667	8.49784	11.5598
chr4	3203237	3203826	590	3203424	48	16.7077	11.2237	7.68552
chr2	3205384	3206050	667	3205799	46	16.0258	13.2644	13.9817
chr13	3214299	3214704	406	3214485	33	11.5931	12.9243	8.63573
chr1	3214787	3215591	805	3215210	80	27.6189	13.6045	24.843
chr2	3215484	3215801	318	3215705	21	7.50143	4.76158	3.45041
chr2	3220227	3221031	805	3220685	56	19.4355	17.6859	14.8041
chr12	3221756	3222569	814	3222186	42	14.6619	9.52316	14.8041
chr6	3224629	3224951	323	3224749	19	6.81948	5.78192	5.75715
chr8	3238903	3239789	887	3239338	70	24.2092	13.8481	20.15
chr6	3243501	3244034	534	3243782	30	9.55294	9.86327	9.86941
chr12	3246085	3246385	301	3246199	20	7.16045	5.78192	7.40205
chr15	3251742	3252647	906	3252190	113	38.871	30.27	33.124
chr17	3252330	3253366	1037	3252800	112	38.5301	36.3921	34.5429
chr11	3253164	3253427	264	3253361	14	5.11461	5.3908	8.63573
chr6	3255091	3255374	284	3255246	19	6.81948	5.10169	5.66422
chr18	3263869	3264252	384	3264081	27	8.84676	7.8226	9.04696
chr12	3269852	3270288	437	3270105	28	9.88824	6.80226	8.28099
chr18	3284338	3284851	514	3284615	27	9.54727	5.10169	7.40205
chr4	3284803	3285394	592	3285273	24	7.70398	6.28927	5.75715
chr19	3292215	3292594	380	3292400	33	8.51398	7.08508	5.21223
chr15	3295236	3295534	299	3295387	20	7.16045	5.69029	6.16838
chr19	3297559	3297962	404	3297768	42	14.6619	10.2034	11.9255
chrX	3299479	3300254	776	3299911	48	16.7077	12.5842	13.9817
chr6	3303652	3304386	735	3303978	49	17.0487	11.904	14.8041
chr7	3304803	3305392	590	3304960	16	5.79656	6.80226	6.5796
chr11	3307706	3308421	716	3307967	69	23.5834	15.3817	21.3837
chr9	3312202	3313011	810	3312691	52	16.3324	14.2847	18.9164
chr15	3319929	3320231	303	3320079	25	8.01214	5.44181	6.08903
chr13	3326209	3326507	299	3326325	18	6.4785	7.48248	8.2245
chr5	3343149	3343971	823	3343676	51	15.4678	16.6655	15.1367
chr7	3352694	3352960	267	3352792	16	5.79656	6.80226	6.5796
chr2	3355614	3356277	664	3355816	51	16.0243	5.88443	14.8368
chr13	3360082	3360960	879	3360525	67	20.9548	19.3864	23.0286
chr7	3360293	3360824	532	3360498	40	13.9799	13.2644	9.86941
chr2	3363186	3363787	602	3363365	33	11.5931	7.48248	7.81328
chr4	3368875	3369720	846	3369255	52	16.3324	15.9853	11.3864
chr6	3370291	3370553	263	3370356	15	5.45558	3.89336	7.40205
chr12	3372181	3373057	877	3372503	54	18.7536	10.2034	12.4336
chr1	3372721	3373141	421	3372886	34	10.7856	9.18305	9.34596
chr6	3375741	3376081	341	3375862	26	9.2063	5.10169	12.748
chr7	3381691	3382495	805	3381942	68	23.5272	17.0056	19.3276
chr6	3382562	3382912	351	3382664	20	7.16045	4.42147	9.04696
chr12	3382667	3382962	296	3382803	18	6.4785	5.69029	5.34593
chr1	3385341	3385977	637	3385731	55	19.0945	9.52316	20.15
chr19	3388866	3389308	443	3389167	28	5.28219	6.52951	6.67166
chr18	3394889	3395223	335	3395030	30	9.55294	4.08135	6.99083
chr11	3398144	3399213	1070	3398566	106	36.4842	23.6596	27.2583
chr19	3405219	3405914	696	3405643	58	18.5262	8.74063	18.2872
chr2	3409713	3410032	320	3409916	32	11.1179	7.8226	11.1031
chr6	3422478	3423402	925	3422910	164	41.3178	45.9152	41.0599
chr15	3432551	3433853	1303	3433273	136	46.1562	33.6712	30.0186
chr9	3436310	3437138	829	3436645	48	16.7077	9.86327	16.8602
chr4	3449465	3450305	841	3449860	59	20.4584	9.52316	13.5704
chr13	3450908	3451293	386	3451098	33	11.5931	10.2034	7.40205
chr8	3458013	3458343	331	3458183	26	6.7611	9.40317	8.2245
chrX	3460542	3461042	501	3460753	31	6.7485	4.75516	7.9299
chr18	3461441	3462277	837	3461825	67	23.1862	12.9243	11.1031
chr9	3461457	3461820	364	3461662	29	6.32672	5.3908	5.0978
chr19	3464628	3465447	820	3465076	40	12.9542	6.55548	5.60073
chr7	3474880	3475909	1030	3475322	119	40.9169	26.8689	43.5899
chr2	3483644	3484096	453	3483848	37	10.6782	4.08299	6.08903
chr10	3485497	3486097	601	3485662	59	20.4584	11.2237	12.748
chr19	3487662	3488714	1053	3488213	112	33.6127	26.355	36.599
chr17	3487630	3488388	759	3487933	30	7.76274	7.14237	11.1031
chr5	3490310	3490821	512	3490623	34	10.7856	8.84293	6.5796
chr18	3494332	3494943	612	3494703	22	7.8424	5.44181	7.40205
chr17	3496126	3496400	275	3496225	19	6.31911	7.48248	4.81458
chr16	3498903	3499249	347	3499017	29	10.2292	5.44181	8.2245
chr9	3500868	3501564	697	3501294	54	18.7536	13.2644	22.6174
chr4	3502882	3503247	366	3503018	24	8.52435	5.09131	6.99083
chr10	3506369	3507122	754	3506806	66	20.6467	18.3661	17.2521
chr14	3508824	3509349	526	3508975	14	5.11461	4.76158	5.34593
chr11	3512028	3513133	1106	3512619	68	23.5272	14.7785	15.8598
chr16	3515567	3516521	955	3516026	64	22.1633	17.0056	16.8602
chr4	3515634	3516667	1034	3516178	69	23.8682	15.3051	21.7949
chr5	3516109	3516771	663	3516554	51	13.0214	9.52316	14.3929
chr13	3537722	3538648	927	3538174	96	32.6799	27.0521	27.1882
chr9	3537913	3538234	322	3538060	24	8.52435	6.46214	10.6919
chr5	3537892	3538315	424	3538091	49	17.0487	5.25051	12.3368
chr5	3544855	3545841	987	3545267	76	23.7283	22.8655	22.2062
chr4	3547789	3548846	1058	3548334	103	30.9356	22.8228	27.5521
chr18	3550964	3551897	934	3551546	92	31.7106	14.3249	34.9541
chr11	3552694	3553539	846	3553059	42	14.6619	6.12203	9.04696
chr19	3556659	3557072	414	3556886	34	8.76439	9.86327	10.2806
chr13	3556446	3557047	602	3556847	22	7.8424	4.76158	8.70362
chr10	3557756	3558522	767	3558171	50	17.3897	11.2237	13.2446
chr12	3558497	3559348	852	3558910	70	24.2092	12.414	18.6322
chr11	3564418	3565189	772	3564739	43	15.0029	12.5842	11.2303
chr11	3585848	3586496	649	3586069	24	8.52435	6.31268	11.5143
chr15	3587733	3588900	1168	3588287	116	36.0546	33.6712	42.7674
chr2	3588146	3589238	1093	3588735	53	18.4126	16.1724	16.449
chr7	3593265	3593554	290	3593446	22	7.8424	5.44181	8.63573
chr4	3596823	3597259	437	3597025	28	9.88824	5.78192	17.6827
chr10	3601048	3601427	380	3601189	23	7.39582	6.46214	3.68174
chr11	3602218	3603061	844	3602388	18	6.4785	4.76158	8.63573
chr13	3611024	3611420	397	3611210	32	11.2521	8.16271	6.72483
chr11	3611680	3612339	660	3611906	71	24.5501	10.0387	17.2715
chr16	3613171	3613590	420	3613381	39	10.0164	6.46214	7.59091
chr11	3614032	3614907	876	3614472	54	16.9488	11.904	16.0433
chr4	3616169	3616679	511	3616475	41	13.2701	8.16271	16.449
chr10	3617845	3618395	551	3618056	32	11.1179	7.14237	13.5704
chr11	3620729	3621214	486	3620964	38	13.298	5.98978	10.2806
chr8	3625131	3625438	308	3625341	31	7.36324	5.30789	8.62603
chr2	3627586	3628637	1052	3628235	75	25.914	14.965	29.6082
chr8	3629364	3630003	640	3629620	42	14.5837	12.9243	14.8041
chr6	3630453	3631088	636	3630926	31	10.9112	7.14237	12.3368
chr19	3640140	3641041	902	3640568	56	17.4664	12.5842	11.7314
chr7	3647718	3647984	267	3647909	19	5.62013	6.12203	5.87548
chr1	3649965	3650815	851	3650407	51	17.7306	16.3254	14.8041
chr6	3650540	3650890	351	3650644	24	8.42266	4.01429	6.90083
chr5	3650958	3651596	639	3651335	56	10.3822	8.69926	13.9817
chr13	3652697	3653271	575	3653048	41	12.9427	8.84293	7.81328
chr18	3655603	3655941	339	3655794	34	11.9341	7.8226	13.9817
chr15	3670030	3670346	317	3670213	29	10.2292	7.48248	12.3368
chr16	3683220	3683627	408	3683394	23	8.18337	9.52316	9.86941
chr15	3685809	3686663	855	3686195	59	20.2144	13.477	15.6266
chr8	3686573	3687668	1096	3687247	42	14.6619	10.8836	15.2997
chr3	3687403	3687724	322	3687522	30	10.5702	5.78192	4.83058
chr19	3687778	3688063	286	3688001	12	4.43266	5.78192	4.8535
chr9	3698433	3698763	331	3698520	41	8.85741	10.2034	13.9817
chr11	3708352	3709165	814	3708732	40	13.9054	11.904	11.1035
chrX	3731765	3732187	423	3731952	32	11.2521	8.84293	10.6919
chr18	3734487	3735346	860	3734911	83	28.6418	22.7876	30.0194
chr4	3738809	3739766	958	3739057	70	24.2092	12.5842	25.496
chr19	3748107	3748462	356	3748312	37	12.957	8.68518	8.63573
chr14	3747875	3748735	861	3748429	16	5.79656	4.82563	5.8657
chr4	3751839	3752193	355	3751996	20	6.47134	5.44181	4.48554
chr12	3752016	3752812	797	3752472	58	20.1175	13.477	13.9817
chr1	3755388	3756699	1312	3755933	120	30.2997	30.27	17.5131
chr2	3755825	3756247	423	3756063	40	12.6345	8.16271	9.85982
chr18	3760490	3761288	799	3760872	61	21.1404	12.5785	19.7388
chr11	3763742	3764870	1129	3764440	81	24.3916	21.7672	17.1132
chr7	3764271	3764571	301	3764402	29	10.2292	6.12203	8.63573
chr8	3764431	3765269	839	3764838	40	13.9799	8.25504	12.748
chr15	3765182	3766449	1268	3765753	123	42.2808	28.9096	48.9358
chr2	3772546	3773365	820	3772955	70	14.3831	16.3254	13.3109
chr11	3780441	3781386	946	3780953	84	27.0243	20.0658	26.7296
chr13	3791346	3791791	446	3791667	14	4.62239	5.78192	9.04696
chr6	3794173	3794503	331	3794395	22	7.8424	5.10169	9.04696
chr11	3794326	3795043	718	3794738	53	16.6406	14.6249	12.748
chr12	3797962	3800052	2091	3798539	139	47.7364	37.0723	29.7371
chr18	3802912	3803646	735	3803242	32	11.2521	8.68518	11.5143
chr18	3804199	3804950	752	3804558	53	13.5222	14.965	15.6266
chr16	3816401	3816707	307	3816556	12	4.43266	3.67469	4.9347
chr18	3816558	3816873	316	3816698	25	8.86532	6.46214	8.2245
chr12	3817251	3817675	425	3817543	23	8.08576	9.18305	5.8657
chr5	3824258	3824658	401	3824430	21	7.50143	7.48248	6.16838
chr12	3824481	3825089	609	3824625	22	7.64743	5.82709	5.75715
chr19	3825011	3825888	878	3825437	50	15.7161	9.71182	12.8944
chr2	3829934	3830468	535	3830353	31	10.781	4.82113	6.5796
chr1	3832675	3832954	280	3832806	22	7.08766	7.14237	8.63573
chr12	3832971	3833346	376	3833168	29	7.51233	5.78192	5.29786
chr11	3834222	3835988	1767	3834721	98	33.7564	27.209	22.3261
chr19	3837764	3838138	375	3837990	23	7.39582	4.28714	4.24816
chr16	3840679	3841102	424	3840887	40	13.9799	10.5435	11.9255
chr11	3841933	3842264	332	3842077	30	8.7112	6.08031	14.0379
chr16	3854210	3855531	1322	3854755	153	43.275	38.3346	39.3347
chr4	3856513	3857106	594	3856644	60	15.2751	14.8142	7.18346
chr12	3860873	3862370	1498	3861872	109	27.5452	22.0944	25.0725
chr8	3865902	3866571	670	3866351	45	15.6848	9.52316	6.99083
chr18	3869893	3870747	855	3870353	67	23.1862	21.087	21.3926
chr3	3871235	3872280	1046	3871858	75	25.914	12.5785	18.0939
chr2	3871843	3872413	571	3872225	44	13.3856	11.2237	7.52175
chr13	3879223	3879503	281	3879364	17	6.13753	4.42147	6.16838
chr11	3880406	3881051	646	3880631	33	9.55422	2.99361	5.94743
chr17	3885610	3885952	343	3885840	16	5.79656	6.46214	10.2806
chr13	3886309	3886647	339	3886415	40	10.2668	8.68518	6.79988
chr17	3886555	3887380	826	3886905	75	25.914	16.6655	26.7296
chr11	3890622	3890982	361	3890806	41	12.9427	6.46214	5.73086
chr5	3891209	3892230	1022	3891861	134	46.0315	32.3107	37.0103
chr4	3897080	3897346	267	3897189	17	3.79603	8.16271	6.51385
chr19	3898173	3898447	275	3898310	24	4.00737	6.46214	6.1639
chr11	3898039	3899595	1557	3898706	166	35.2188	41.03	32.8525
chr13	3902859	3903726	868	3903286	57	18.7929	15.9853	12.0764
chr19	3903058	3903764	707	3903503	62	19.9052	11.897	23.8511
chrY	3915564	3915853	290	3915716	25	6.51069	8.84293	8.63573
chr19	3915672	3916598	927	3916094	77	20.7698	18.4337	16.8181
chr6	3919055	3919626	572	3919246	41	14.3209	9.52316	7.40205
chr8	3921000	3921668	669	3921279	41	14.3209	7.48722	11.9255
chr9	3922964	3923241	278	3923056	18	6.4785	6.46214	7.40205
chr2	3925558	3926525	968	3926122	94	32.3925	19.0463	24.2623
chr16	3926468	3927133	666	3926899	34	11.9341	8.38569	13.1592
chr10	3927021	3927555	535	3927427	21	7.50143	4.76158	5.75715
chrX	3930350	3930742	393	3930611	26	9.2063	5.44181	9.04696
chr11	3931334	3931948	615	3931550	39	8.43563	7.48722	10.6189
chr1	3932449	3934085	1637	3933413	154	52.851	39.113	50.5807
chr3	3934483	3934809	327	3934607	26	6.7611	4.69544	6.48466
chr11	3934986	3935319	334	3935145	24	8.52435	6.46214	11.6314
chr2	3940086	3940829	744	3940435	33	10.4774	8.16271	13.5704
chr15	3941673	3942481	809	3942046	65	22.5043	12.2441	20.5613
chr8	3948863	3949326	464	3949106	38	13.298	7.18774	12.748
chr13	3951429	3952126	698	3951673	53	18.4126	20.4068	16.8602
chr1	3958047	3958918	872	3958503	84	28.9828	16.3254	20.9725
chr19	3966255	3966578	324	3966496	39	7.28577	11.5638	10.7028
chr3	3977887	3978851	965	3978404	48	16.7077	10.8836	15.6266
chr7	3978136	3978904	769	3978605	68	17.2784	18.7062	13.1592
chr11	3981420	3981827	408	3981593	20	7.16045	6.28949	6.62437
chr16	3986066	3986331	266	3986187	17	4.55434	6.76187	3.96495
chr9	3992161	3993290	1130	3992655	119	40.9169	28.9096	30.4307
chr14	3993743	3994654	912	3994514	25	6.51069	4.52403	7.81328
chr18	3993590	3994430	841	3994014	46	16.0258	12.9243	13.9817
chr18	3996602	3997669	1068	3997088	123	38.2118	30.9503	40.3001
chr1	4000306	4000589	284	4000462	25	8.01214	6.46214	5.8657
chr4	4009909	4010429	521	4010211	17	5.6872	5.78192	5.17562
chr18	4023595	4023942	348	4023775	22	4.85049	4.61311	5.52066
chr4	4025619	4026016	398	4025787	45	14.1753	10.8836	16.0378
chr8	4025886	4026187	302	4025988	25	6.51069	4.89959	5.38101
chr4	4028909	4029175	267	4029057	16	5.79656	7.14237	6.5796
chr17	4030275	4031541	1267	4031040	153	47.4565	39.7932	39.0664
chr16	4038757	4039595	839	4039170	69	23.8682	17.7945	16.2497
chr5	4041290	4042026	737	4041608	49	16.8453	17.0056	13.9817
chr3	4047250	4047655	406	4047503	25	8.86532	9.18305	7.81328
chr10	4049450	4049903	454	4049609	25	8.86532	6.46214	4.56328
chr5	4061017	4061414	398	4061196	29	10.2292	6.88825	6.16838
chrX	4063854	4064717	864	4064340	36	12.616	10.8836	8.63573
chr13	4066420	4066726	307	4066552	23	8.18337	9.18305	7.94678
chr12	4070924	4071431	508	4071108	22	7.8424	7.14237	5.75715
chr13	4074660	4075003	344	4074829	36	6.73934	8.49784	4.77996
chr7	4078043	4078767	725	4078387	53	18.4126	11.2237	7.9226
chr13	4078724	4079079	356	4078843	21	5.50904	5.10169	7.59091
chr18	4089463	4090290	828	4089807	52	18.0716	10.8836	19.3276
chr2	4089886	4090473	588	4090015	37	11.3034	10.5435	9.45818
chr3	4091983	4092563	581	4092384	29	9.24478	7.48248	5.75715
chr4	4100877	4101235	359	4101046	24	8.52435	4.76158	6.99083
chr12	4103410	4103682	273	4103583	20	6.47134	8.16271	5.52397
chr3	4104900	4105476	577	4105278	36	12.616	10.8836	12.748
chr4	4105687	4106618	932	4106195	83	28.6418	17.6859	25.9072
chr19	4107096	4107630	535	4107271	19	6.16319	5.78192	7.40205
chr2	4106964	4107724	761	4107303	37	12.957	11.2237	7.64669
chr2	4118436	4119431	996	4118868	81	27.9599	19.3864	32.4868
chr11	4129015	4129563	549	4129345	35	12.2751	9.18305	9.66116
chr8	4131635	4132148	514	4131967	23	7.39582	7.48248	6.05469
chr5	4134352	4134616	265	4134430	17	6.13753	5.44181	5.17562
chr1	4135025	4135327	303	4135105	30	9.2212	6.12203	6.5796
chr15	4141339	4141898	560	4141582	46	16.0258	12.5842	16.8455
chr12	4141584	4141967	384	4141758	20	6.47134	5.44181	4.48554
chr15	4146433	4147455	1023	4146930	87	30.0057	11.6542	21.7949
chr8	4147509	4148052	544	4147666	35	12.2751	8.0862	7.40205
chr19	4149462	4149790	329	4149617	26	9.2063	5.10169	7.94678
chr11	4150022	4150756	735	4150431	59	13.8061	9.35867	12.1781
chr11	4152683	4154377	1695	4153772	192	60.6026	43.2374	53.6602
chr6	4154204	4154592	389	4154372	38	12.0182	10.8836	9.45818
chr3	4156357	4156894	538	4156497	77	26.596	13.6045	22.2062
chr16	4158854	4159442	589	4159217	33	11.5931	7.14237	10.762
chr18	4164551	4165989	1439	4165315	142	48.7593	36.5376	52.2256
chr18	4167809	4168759	951	4168338	70	17.7792	19.3864	30.0194
chr7	4175438	4176595	1158	4176066	100	31.1241	25.1684	32.4868
chr6	4177717	4178112	396	4177888	132	15.6773	10.3321	18.9717
chr9	4183221	4183537	317	4183402	25	8.01214	5.98978	6.16838
chr4	4183680	4185360	1681	4184594	172	58.9885	38.7729	70.7307
chr8	4185402	4185941	540	4185741	24	7.70398	7.14237	5.17562
chr10	4187427	4188452	1026	4187937	109	33.8975	29.9299	23.4628
chr2	4188235	4188766	532	4188571	31	10.9112	6.80226	9.45818
chr7	4193173	4193580	408	4193374	28	8.93662	6.12203	7.64669
chr5	4195879	4196837	959	4196358	129	32.5534	28.2294	42.7674
chr8	4199889	4200234	346	4200061	34	8.76439	9.86327	8.2245
chr5	4204399	4205196	798	4204861	78	26.9369	16.6655	21.3837
chr15	4208521	4209273	753	4208873	42	13.2508	7.78671	16.0378
chr15	4208521	4209273	753	4208873	42	13.2508	7.78671	4.52348
chr17	4209842	4210573	732	4210320	46	16.0258	10.8836	10.8798
chr11	4217324	4217704	381	4217443	26	5.69405	6.28927	7.94678
chr11	4219668	4220163	496	4219982	44	13.3856	6.94109	9.86941
chr11	4221151	4221665	515	4221486	28	8.94033	6.11893	6.78625
chr1	4225799	4226789	991	4226232	110	37.8481	24.8576	19.454
chr8	4228265	4228573	309	4228434	21	7.50143	4.76158	6.5796
chr18	4233055	4234215	1161	4233670	136	42.2178	37.4124	31.7438
chr1	4233273	4233766	494	4233542	27	9.54727	4.61311	7.40205
chr8	4233456	4234623	1168	4233925	87	27.8041	21.2637	23.4398
chr12	4235498	4236059	562	4235692	38	12.3223	6.27092	13.473
chr2	4238069	4238509	441	4238301	28	9.88824	9.33942	8.2245
chr17	4241528	4242249	722	4242036	44	15.3438	12.2441	11.9255
chr8	4253415	4253757	343	4253557	39	8.43563	6.12449	9.31612
chr15	4257175	4257524	350	4257422	38	13.298	9.86327	6.90083
chr12	4257341	4257891	551	4257470	32	10.1693	7.8226	13.1592
chr18	4258063	4258626	564	4258278	32	10.1693	11.5638	11.5143
chr2	4259157	4260125	969	4259623	60	20.7994	14.6249	18.0939
chr15	4262012	4262331	320	4262223	19	6.81948	5.69029	8.63573
chrX	4264423	4264901	479	4264606	32	11.2521	11.5638	12.748
chr2	4266412	4267049	638	4266833	47	16.3667	14.9744	16.449
chr8	4268071	4269141	1071	4268642	121	37.5954	27.209	30.8419
chr11	4269783	4270054	272	4269979	21	4.00718	8.16271	7.24587
chr11	4271449	4272181	733	4271859	42	14.487	13.7765	12.8662
chr19	4272758	4273663	906	4273205	61	18.4424	15.3051	7.9226
chr18	4276490	4277047	558	4276799	46	16.0258	10.5435	12.748
chr6	4282730	4283124	395	4282918	39	10.0164	6.08031	5.94743
chr12	4284952	4285497	546	4285257	39	13.639	5.51204	7.40205
chr11	4285546	4286013	468	4285799	41	12.9427	7.0899	4.8535
chr16	4288338	4288705	368	4288560	21	5.50904	4.18664	6.23064
chr19	4290694	4291078	385	4290854	30	7.84359	4.30333	6.84199
chr4	4296509	4296883	375	4296682	19	6.81948	4.76158	9.45818
chr16	4301412	4301932	521	4301573	40	13.9799	9.86327	8.46877
chr17	4302240	4302881	642	4302457	37	10.6782	10.8836	6.5796
chr7	4310323	4310861	539	4310670	31	4.13692	4.89959	5.62921
chr17	4314222	4314814	593	4314428	66	22.8453	11.6801	10.2806
chr13	4314101	4314898	798	4314510	28	9.88824	6.46214	6.99083
chr1	4318807	4319159	353	4319000	23	8.18337	2.85809	6.99083
chr12	4330894	4331338	445	4331110	15	4.00658	3.39914	5.17706
chr19	4333934	4334316	383	4334078	31	5.82862	5.30789	5.37268
chr13	4345056	4345331	276	4345284	18	4.00692	5.09131	5.2838
chr16	4348210	4348679	470	4348427	48	16.7077	13.6045	16.0378
chr13	4349817	4350779	963	4350143	66	22.8453	14.2847	23.4398
chr19	4360818	4361804	987	4361258	52	14.8933	14.965	10.4788
chr6	4367770	4368113	344	4367915	33	11.5931	5.78192	6.99083
chr18	4367999	4368554	556	4368403	38	12.0182	8.84293	7.24587
chr6	4374726	4375230	505	4374979	35	11.0937	14.2847	17.2715
chr18	4385452	4386262	811	4385834	72	22.4956	13.9446	22.6174
chr6	4387481	4388882	1402	4388256	135	34.0559	35.0316	45.646
chr8	4389050	4390254	1205	4389661	140	48.0773	33.3311	30.3036
chr13	4392208	4392768	561	4392384	26	9.2063	4.12752	9.45818
chr6	4394856	4395626	771	4395254	48	16.7077	8.50282	15.6266
chrX	4396968	4397359	392	4397128	34	10.7856	7.8226	9.86941
chr6	4399483	4399770	288	4399581	22	4.18932	5.98978	9.45818
chr2	4403695	4404262	568	4404085	23	8.18337	5.10169	13.1592
chr13	4415888	4416612	725	4416221	48	16.7077	13.1775	15.2153
chr13	4417313	4417902	590	4417714	65	22.5043	17.6859	15.2153
chr13	4418729	4419072	344	4418870	22	7.8424	5.78192	3.79545
chr12	4419604	4420365	762	4420049	38	13.298	7.96184	7.36348
chr4	4425656	4426176	521	4425845	17	3.79603	5.44181	3.12224
chr12	4427126	4428053	928	4427524	103	35.4613	27.553	20.1745
chr10	4440932	4441685	754	4441343	44	12.6453	15.6452	7.29713
chr10	4448765	4450239	1475	4449270	125	35.4068	23.5511	31.1615
chr7	4455612	4456190	579	4455743	24	7.70398	7.28386	5.66422
chr12	4457398	4457988	591	4457735	49	17.0487	13.2644	10.3512
chrX	4458709	4459082	374	4458883	29	10.2292	8.50282	7.40205
chr1	4460159	4461054	896	4460434	36	11.4019	6.80226	7.40205
chr5	4460511	4460874	364	4460695	30	10.5702	8.84293	6.5796
chr16	4461343	4462465	1123	4461917	108	33.5894	14.97	11.7126
chr11	4464773	4466418	1646	4465584	199	42.1782	42.5141	53.6654
chr8	4465521	4465908	388	4465741	19	6.16319	6.46214	9.04696
chr4	4465667	4466750	1084	4466159	62	19.414	11.2237	23.4398
chr8	4466704	4467402	699	4467076	58	20.1175	8.16271	20.15
chr17	4472099	4472596	498	4472352	29	10.2292	6.58876	7.81328
chr19	4478209	4478579	371	4478457	31	9.8611	6.46214	5.8377
chr11	4481175	4481839	665	4481467	34	11.9341	10.5561	11.9255
chr11	4483854	4485168	1315	4484582	123	39.9233	23.3084	28.6384
chr8	4484923	4485921	999	4485075	20	6.47134	4.85591	7.21948
chr8	4484923	4485921	999	4485075	20	6.47134	5.10169	7.21948
chr2	4491450	4491751	302	4491642	34	8.76439	8.84293	7.93595
chr2	4491949	4492524	576	4492313	31	10.9112	8.84293	7.93595
chr2	4491949	4492524	576	4492313	31	10.9112	8.84293	9.86941
chr1	4492642	4493520	879	4493069	44	15.3438	8.84293	11.5143
chr17	4496161	4496443	283	4496307	16	5.79656	4.08135	6.90083
chr11	4496848	4497287	440	4497163	13	4.16441	6.58876	6.16838
chr19	4501052	4502087	1036	4501693	57	19.7765	11.9796	14.0191
chr18	4505194	4505510	317	4505362	20	5.25863	5.78192	9.04696
chr3	4505356	4506228	873	4505780	83	28.6418	20.0667	31.2531
chr12	4508864	4509476	613	4509228	29	9.24478	6.31268	11.6314
chr15	4516612	4516918	307	4516693	20	7.16045	5.98978	6.16838
chr18	4518913	4519790	878	4519452	60	20.7994	11.897	15.3711
chr15	4519679	4520757	1079	4520153	52	18.0716	7.8226	18.0939
chr16	4524963	4525668	706	4525441	75	16.0277	20.0658	19.3276
chr1	4532707	4533875	1169	4533375	123	42.2808	29.9299	38.6552
chr3	4535996	4536321	326	4536135	30	10.5702	6.12203	15.6266
chrY	4537839	4538258	420	4538040	54	18.7536	15.9853	14.8041
chr7	4539663	4540299	637	4540042	57	17.8732	14.3755	16.2169
chrX	4541217	4542294	1078	4541790	145	49.7822	31.1469	36.251
chr14	4542509	4542874	366	4542687	41	10.5173	9.52316	11.1031
chr11	4543287	4543902	616	4543732	29	9.24478	4.85591	10.6963
chr18	4553327	4553691	365	4553465	34	11.9341	9.52316	11.1031
chr8	4557238	4557824	587	4557389	43	15.0029	7.14237	12.3368
chr5	4557570	4558749	1180	4558040	88	30.3467	16.7322	26.3184
chr4	4567059	4567649	591	4567248	55	19.0945	9.52316	16.2169
chr6	4568108	4568512	405	4568345	29	10.2292	5.10169	9.86941
chr17	4569389	4570289	901	4569818	64	20.0303	11.6801	20.9725
chr8	4571450	4571845	396	4571700	31	8.01315	5.10473	7.24587
chr19	4574042	4574884	843	4574367	29	6.32672	7.34704	7.36348
chr4	4576022	4576732	711	4576410	40	13.9799	9.86327	10.6919
chr19	4578728	4579028	301	4578921	18	6.4785	8.98467	8.93079
chr3	4585600	4585879	280	4585814	18	6.4785	3.89336	6.55579
chr4	4587930	4588534	605	4588108	46	11.7693	12.2441	12.4215
chr19	4588001	4588828	828	4588464	63	21.1414	7.43297	20.15
chr10	4591884	4592189	306	4592007	29	9.24478	6.12203	7.24587
chr5	4601877	4602292	416	4602078	29	8.43019	5.38832	6.16838
chrX	4610605	4611100	496	4610741	27	8.62846	9.86327	8.63573
chr17	4616321	4617188	868	4616952	32	10.4265	6.79827	6.16838
chr17	4616321	4617188	868	4616952	32	10.4265	6.79827	11.1031
chr17	4619479	4619846	368	4619707	37	11.7101	6.80226	10.6919
chr14	4619534	4619973	440	4619735	46	16.0258	10.8836	11.9255
chr9	4619652	4620334	683	4620072	80	27.6189	18.7062	29.6082
chr3	4627004	4628560	1557	4628096	66	22.8453	16.3254	17.2715
chrX	4632168	4632461	294	4632274	20	7.16045	7.14237	6.5796
chr10	4633869	4634201	333	4633981	27	9.54727	9.18305	8.63573
chr17	4633983	4634535	553	4634279	47	10.1228	7.18774	11.1031
chr11	4636844	4637573	730	4637047	65	16.5271	12.9689	15.9797
chr1	4645034	4646109	1076	4645573	96	33.0745	22.4617	29.6082
chr9	4649256	4650644	1389	4649923	181	33.1503	48.6361	57.5715
chr1	4654928	4655254	327	4655157	23	8.18337	6.58876	10.6919
chr17	4658612	4658970	359	4658834	20	7.16045	5.10169	4.9347
chr4	4658725	4659028	304	4658909	23	7.39582	3.39914	5.34593
chr7	4663067	4664105	1039	4663447	90	30.6585	18.2096	15.3711
chr4	4668003	4668272	270	4668118	18	5.6517	6.46214	7.40205
chr5	4672776	4673402	627	4673156	49	17.0487	12.5842	18.0939
chr4	4673469	4673775	307	4673608	22	4.18932	6.46214	8.63573
chr3	4676408	4677264	857	4676737	35	12.2751	8.16271	16.0378
chr16	4677306	4678048	743	4677717	49	10.5445	15.1363	8.26152
chr2	4678251	4678580	330	4678486	22	7.08766	6.80226	10.6919
chr10	4680384	4681119	736	4680686	69	14.7623	19.0463	15.6266
chr8	4683229	4683607	379	4683383	22	7.08766	5.44181	8.63573
chr3	4686963	4687582	620	4687385	54	13.7726	11.3806	13.1592
chr16	4690888	4691288	401	4691075	21	6.54408	6.46214	6.5796
chr18	4695350	4695956	607	4695554	31	10.9112	5.69029	6.16838
chr3	4704140	4704780	641	4704356	66	22.8453	14.6249	15.6266
chr10	4704550	4705169	620	4704799	37	6.0912	7.78671	12.748
chr4	4706134	4707072	939	4706326	34	11.9341	7.48248	11.9255
chr18	4707851	4708353	503	4708113	47	14.7917	12.279	18.9164
chr2	4712965	4714137	1173	4713615	125	42.9627	29.5898	41.1225
chr16	4715273	4716302	1030	4715713	60	20.7994	8.98343	12.4878
chr3	4718510	4718826	317	4718687	28	7.26192	6.46214	6.55579
chr9	4721886	4722652	767	4722219	72	24.8911	16.1724	14.727
chr8	4723407	4724430	1024	4723851	73	25.2321	21.7672	25.0847
chr18	4724639	4725201	563	4724951	34	11.9341	7.48722	9.45818
chr11	4726589	4727024	436	4726812	38	13.1394	6.80718	11.5999
chr10	4730170	4730528	359	4730358	47	5.65799	7.39692	13.5518
chr3	4734873	4735192	320	4735085	17	4.5074	7.8226	6.16838
chr11	4735521	4736611	1091	4736066	45	15.0004	8.79148	10.0329
chr6	4736323	4738075	1753	4736926	117	40.2349	21.366	29.0125
chr19	4742357	4742639	283	4742527	28	7.26192	6.55548	9.62598
chr5	4742793	4743327	535	4743223	26	9.2063	7.8226	8.63573
chr16	4743395	4744139	745	4743688	25	8.86532	7.78671	4.58677
chr14	4743892	4744165	274	4743943	27	5.90494	5.3908	6.5796
chr7	4745612	4746030	419	4745808	35	9.0148	8.84293	7.81986
chr1	4746578	4746906	329	4746763	19	6.16319	8.50282	10.2806
chrY	4757746	4758446	701	4758342	29	10.2292	7.48248	11.9255
chr17	4758143	4758621	479	4758390	29	10.2292	8.16271	8.02165
chr13	4767430	4767930	501	4767688	41	14.3209	8.16271	15.2153
chr6	4786411	4787171	761	4786700	51	17.7306	18.7062	11.7314
chr7	4787357	4787831	475	4787599	52	18.0716	12.6672	4.78897
chr12	4789908	4790192	285	4790008	21	7.50143	6.46214	6.16838
chr10	4794350	4794616	267	4794526	15	4.93055	4.76158	4.9347
chr11	4797037	4797930	894	4797523	79	20.2415	13.2697	19.7388
chr10	4796913	4797577	665	4797340	59	18.4896	12.2441	16.8602
chr12	4797520	4798585	1066	4798068	90	28.752	23.9591	28.354
chr3	4801775	4803012	1238	4802399	179	61.3753	46.2553	43.5899
chr14	4804652	4804992	341	4804760	58	14.4253	11.897	19.414
chr14	4806344	4807216	873	4806803	102	16.3127	11.0689	18.6033
chr12	4810306	4810576	271	4810382	18	5.6517	5.48659	6.21074
chr9	4811751	4813055	1305	4812580	97	33.4154	22.1073	30.4307
chr16	4812587	4812938	352	4812743	32	10.1693	5.88762	10.0062
chr3	4818664	4818936	273	4818761	26	4.9179	5.78192	6.99083
chr17	4819906	4820530	625	4820131	34	11.9341	7.14237	7.81328
chr17	4824115	4825234	1120	4824632	92	31.7106	16.2673	16.7094
chrY	4824592	4824934	343	4824709	35	12.0487	5.83645	11.6826
chrX	4826772	4827055	284	4826943	21	7.50143	3.74124	7.81328
chr9	4837258	4837756	499	4837330	16	5.79656	6.12203	6.99083
chr4	4838980	4839341	362	4839159	22	7.8424	7.8226	12.3368
chr19	4841089	4842673	1585	4841686	141	45.7186	27.1931	20.0768
chr12	4845082	4845990	909	4845544	53	16.6406	13.2644	13.4566
chr2	4852776	4853720	945	4853221	117	39.755	14.0894	30.8419
chr12	4858678	4859203	526	4858983	34	11.9341	10.5435	11.1031
chr18	4858847	4859640	794	4859234	64	22.1633	13.2644	15.6266
chr12	4859603	4860067	465	4859807	28	9.88824	5.78192	8.2245
chr19	4860116	4861251	1136	4860775	92	14.9074	20.0158	22.0025
chr6	4862696	4863115	420	4863014	25	8.86532	9.52316	6.5796
chr18	4862982	4864387	1406	4863678	137	47.0544	40.8135	41.5337
chr11	4863724	4864416	693	4864005	36	12.4655	5.28351	9.45818
chr12	4868950	4869314	365	4869132	34	10.7856	9.52316	8.16587
chr18	4875649	4876558	910	4875945	51	13.0214	17.0056	24.6735
chr6	4879150	4880057	908	4879604	73	22.8038	21.4271	23.4398
chr6	4881667	4882019	353	4881858	31	10.9112	6.12203	14.3929
chr2	4883207	4884049	843	4883593	39	13.639	8.50282	11.7314
chr16	4885520	4886402	883	4885935	80	26.9322	17.2385	23.6835
chr19	4885873	4886297	425	4886091	21	5.30236	4.2494	4.91944
chr8	4886308	4886662	355	4886453	31	6.7485	5.78192	7.81328
chr11	4899081	4900508	1428	4899841	120	30.2997	34.3514	40.1082
chr2	4900520	4901954	1435	4901250	122	37.9036	22.8228	42.7674
chr8	4901400	4901716	317	4901521	18	6.4785	5.78192	7.40205
chr1	4911115	4911616	502	4911377	47	15.1659	8.98343	7.44535
chr4	4912226	4912555	330	4912434	23	8.18337	6.12203	11.1031
chr10	4912717	4913067	351	4912885	20	7.07504	6.12203	6.8184
chr3	4914754	4915044	291	4914834	15	5.45558	5.10169	6.99083
chr6	4914823	4915890	1068	4915286	111	38.1891	26.6545	29.197
chr1	4921766	4922147	382	4922014	34	7.38118	6.79827	11.7314
chr17	4926278	4926976	699	4926570	33	11.5931	7.14237	11.9255
chr19	4928373	4928662	290	4928544	27	7.86818	9.52316	9.85982
chr9	4930584	4930846	263	4930645	15	5.45558	5.10169	6.5796
chr17	4933233	4933655	423	4933492	19	6.81948	8.16271	8.2245
chr11	4933126	4934141	1016	4933763	66	16.7775	15.0533	22.2062
chr11	4936816	4937465	650	4937235	35	11.0937	5.10374	11.1031
chr11	4938212	4938669	458	4938473	32	11.1179	5.0987	6.41732
chr2	4940604	4941031	428	4940804	28	9.77029	7.14237	8.63573
chr16	4947694	4948222	529	4947850	24	5.27227	5.78192	8.63573
chr3	4948214	4948478	265	4948326	17	6.13753	5.44181	7.40205
chr12	4954392	4955205	814	4954845	41	14.3209	15.3051	20.5613
chr16	4955433	4956288	856	4955876	53	18.4126	12.5785	20.7321
chr12	4956662	4956979	318	4956810	34	11.9341	3.8483	14.8041
chr16	4957496	4957830	335	4957738	36	12.2224	8.56381	12.4215
chr14	4958245	4958547	303	4958437	35	5.15252	6.587	5.23582
chr11	4962046	4962524	479	4962455	16	3.58514	7.72917	5.55081
chr14	4964485	4964861	377	4964668	42	11.8861	6.79827	11.8022
chr15	4966366	4966700	335	4966560	35	12.2751	5.0987	7.81328
chr17	4966847	4967435	589	4967013	24	8.52435	7.14237	11.1031
chr9	4967544	4967828	285	4967744	19	6.81948	4.49233	6.16838
chr7	4975128	4976239	1112	4975727	119	40.9169	31.1956	33.7205
chr18	4976974	4978371	1398	4977741	134	33.8055	21.4357	24.9779
chr6	4977279	4977785	507	4977384	27	8.32882	6.44098	7.16357
chr2	4978604	4979077	474	4978888	19	5.62013	6.46214	6.49512
chr13	4980215	4980614	400	4980443	30	9.55294	4.89959	9.66116
chr13	4984061	4984558	498	4984301	29	7.51233	6.46214	6.90083
chrY	4986723	4987911	1189	4987154	197	28.3389	26.5937	21.1053
chr17	4989217	4990968	1752	4989998	204	69.8997	42.8542	63.7399
chr19	4990751	4991171	421	4990944	23	8.08576	3.64193	9.45818
chr12	4991304	4991800	497	4991551	36	12.616	6.80226	9.31612
chr12	4997956	4999479	1524	4998653	125	42.9627	26.6545	42.3562
chr18	4999132	4999725	594	4999272	45	15.6848	11.2237	6.23064
chr12	4997956	4999479	1524	4998653	125	42.9627	26.6545	4.52348
chr10	5002441	5002785	345	5002663	26	9.2063	7.48248	9.86941
chr16	5005228	5005980	753	5005509	46	16.0258	11.6801	17.7539
chr12	5005316	5006144	829	5005723	47	16.3667	12.279	20.5613
chr3	5006066	5007019	954	5006524	32	11.2521	7.8226	11.1031
chr15	5012231	5012589	359	5012409	32	11.2521	8.37327	9.31612
chr17	5013212	5013693	482	5013548	23	7.13899	6.28927	6.5796
chr18	5017431	5018319	889	5017966	74	25.573	8.98258	15.5766
chr1	5020729	5021491	763	5021128	40	13.9799	7.18774	7.36348
chr19	5024094	5024621	528	5024432	20	7.16045	5.09131	5.50063
chr10	5028636	5029799	1164	5029300	90	31.0286	15.5154	27.8267
chr1	5030668	5031776	1109	5031255	19	6.81948	6.12203	9.45818
chr17	5030919	5031617	699	5031173	52	18.0716	13.9446	9.0433
chr12	5035686	5036393	708	5035965	48	16.7077	13.5721	16.449
chr6	5036625	5037023	399	5036879	25	8.86532	4.49233	8.2245
chr14	5045995	5046942	948	5046299	57	18.7929	11.9796	21.3837
chr7	5047831	5048310	480	5048033	58	7.62744	11.5638	4.87776
chr12	5049304	5050312	1009	5049793	113	38.4073	22.8228	24.591
chr3	5054711	5055027	317	5054865	20	6.47134	4.49233	5.75715
chr17	5056506	5057339	834	5056836	72	18.28	18.0347	18.2872
chr18	5059008	5059476	469	5059238	27	5.90494	4.61311	10.2806
chr17	5059113	5059400	288	5059174	22	7.40513	5.3415	5.75715
chr11	5062766	5063411	646	5063174	67	14.3474	12.1946	16.0471
chr19	5064793	5065111	319	5064866	18	6.1958	5.3908	6.44721
chr17	5068076	5069224	1149	5068580	56	19.4355	16.3044	16.8602
chr19	5071470	5071765	296	5071602	12	2.74158	4.47832	6.21074
chr6	5075994	5076544	551	5076316	38	13.298	9.86327	15.6266
chrY	5081720	5082137	418	5081941	42	4.00796	4.97417	5.27889
chr6	5084918	5085322	405	5085106	19	6.81948	5.10169	12.3368
chr15	5097705	5098413	709	5098047	37	11.7101	7.48722	6.55579
chr11	5098634	5099518	885	5099102	84	21.5066	8.35717	20.3474
chr18	5100270	5101099	830	5100700	31	9.8611	9.18305	8.63573
chr12	5102016	5102453	438	5102256	16	4.25699	5.10169	5.4399
chr16	5102457	5103457	1001	5102911	107	36.3859	26.8689	29.5166
chr16	5105697	5106826	1130	5106171	137	34.9166	24.2938	30.3636
chr1	5106370	5106673	304	5106499	23	7.58294	8.50282	4.2364
chr15	5110052	5110397	346	5110168	26	9.2063	7.8226	10.5957
chr10	5110468	5111278	811	5110869	60	20.7994	11.1686	9.17353
chr17	5112522	5112812	291	5112699	23	6.00987	5.78192	6.79988
chr19	5113080	5114143	1064	5113727	66	16.9523	16.8959	13.9289
chr15	5114638	5115697	1060	5115156	95	32.7335	22.7876	31.1262
chr11	5120556	5121538	983	5120916	41	14.3209	13.1775	10.4788
chr17	5121880	5122741	862	5122373	85	29.3238	20.7469	16.143
chr4	5122713	5123876	1164	5123356	137	47.0544	33.3311	34.5429
chr7	5125013	5125959	947	5125484	87	26.1763	23.8079	25.0847
chr2	5128347	5128907	561	5128744	59	15.0247	14.6249	15.2153
chr15	5129058	5129767	710	5129387	42	13.2508	11.904	12.3368
chr15	5133113	5133599	487	5133440	33	10.7425	5.92034	6.79988
chr6	5133355	5134149	795	5133853	42	14.6619	16.3254	18.9164
chr9	5133972	5134418	447	5134174	33	11.5931	6.80226	9.04696
chr2	5133704	5134669	966	5134239	81	27.9599	15.6452	20.5613
chr13	5137505	5137940	436	5137705	30	10.5702	8.16271	9.86941
chr10	5151399	5152816	1418	5152059	63	21.8223	14.965	20.15
chr8	5153912	5154883	972	5154369	68	23.5272	13.9446	12.7292
chr6	5154887	5155342	456	5155099	28	9.88824	8.84293	7.24587
chr18	5157368	5157873	506	5157597	25	8.86532	6.46214	5.17562
chr6	5158168	5158706	539	5158349	24	7.43645	4.79182	6.44721
chr11	5158111	5158982	872	5158608	61	21.1404	10.8199	13.2598
chr15	5160576	5162060	1485	5161298	44	11.2685	13.7765	9.83887
chr4	5168482	5169320	839	5168804	23	8.18337	5.78192	5.34593
chr10	5170672	5171816	1145	5171418	64	22.1633	13.9446	14.8368
chr1	5172382	5172741	360	5172529	27	9.54727	9.52316	5.75715
chr16	5172524	5173836	1313	5173135	145	49.7822	37.0723	43.5899
chr17	5174267	5175031	765	5174508	79	19.2813	16.4719	13.1116
chr6	5175399	5176879	1481	5176352	70	24.2092	14.965	27.1409
chr13	5177262	5177524	263	5177472	14	4.62239	5.44181	6.5796
chr11	5177418	5177725	308	5177656	20	7.12226	5.08476	6.01624
chr17	5180674	5181013	340	5180842	31	8.01315	6.79827	6.5796
chrX	5181147	5181903	757	5181667	34	11.9341	6.46214	6.5796
chr13	5181276	5181638	363	5181401	24	8.52435	7.14237	9.86941
chr13	5184029	5184332	304	5184162	21	7.50143	4.42147	8.2245
chr4	5184804	5185133	330	5184975	22	7.8424	8.50282	4.52348
chr7	5187839	5188117	279	5188016	19	6.81948	6.46214	6.5796
chr17	5187940	5188879	940	5188331	66	19.9297	15.8729	20.5613
chr15	5187948	5188264	317	5188031	30	9.55294	6.12203	8.97107
chr12	5190784	5191502	719	5191079	50	17.3897	13.7765	4.42059
chr2	5192268	5192949	682	5192427	31	6.7485	6.88825	6.5796
chr8	5203660	5204034	375	5203838	28	7.26192	5.0987	9.45818
chr2	5205318	5205649	332	5205491	27	8.62846	8.0862	7.81328
chr4	5208231	5209206	976	5208735	70	24.2092	19.7265	20.9725
chr5	5208492	5209384	893	5208838	44	9.49008	8.84293	13.9817
chr3	5210272	5210655	384	5210432	34	11.9341	7.8226	9.04696
chr18	5213508	5213907	400	5213680	34	10.7856	6.73694	7.40205
chr16	5213535	5213900	366	5213702	28	7.26192	5.47483	4.48554
chr12	5214881	5216259	1379	5215468	74	23.6967	17.0709	19.6673
chr9	5224396	5225016	621	5224605	51	17.7306	12.5842	12.748
chr12	5226609	5226871	263	5226822	18	5.33912	5.78192	6.5796
chr2	5230448	5231194	747	5230765	68	18.3733	12.878	19.3276
chr10	5236044	5236406	363	5236190	30	10.5702	8.84293	7.40205
chr2	5246246	5246768	523	5246453	52	18.0716	10.2034	12.748
chr16	5248194	5248619	426	5248443	37	8.01385	5.82709	7.03102
chr15	5249614	5250831	1218	5250397	66	16.7775	18.3661	25.9072
chrY	5250976	5251408	433	5251397	20	2.47537	4.22681	4.96112
chr16	5253362	5253874	513	5253567	27	7.01151	5.29352	7.90213
chrX	5257059	5257481	423	5257228	25	8.86532	8.50282	7.81328
chrY	5257386	5257712	327	5257546	44	9.49008	4.89959	11.3284
chr17	5259263	5260335	1073	5259675	102	31.7404	17.3457	25.9072
chr4	5259701	5260001	301	5259812	24	8.52435	5.44181	5.2838
chr11	5263839	5265039	1201	5264576	69	17.5288	12.0641	13.8017
chr16	5269228	5270096	869	5269703	50	10.7554	13.2644	16.0378
chr5	5269727	5270537	811	5270107	68	23.5272	13.477	20.15
chr8	5270380	5270804	425	5270580	49	8.01474	10.6276	10.0872
chr13	5273532	5274369	838	5273992	58	20.1175	14.965	21.7949
chr17	5273379	5273848	470	5273641	34	9.83522	6.80226	12.748
chr15	5275688	5276366	679	5276118	38	13.298	12.5842	12.3368
chr7	5277685	5278259	575	5277824	29	10.2292	7.14237	9.45818
chr16	5280895	5281826	932	5281331	91	27.3661	13.9501	13.93
chr7	5282014	5282931	918	5282477	56	19.4355	9.86327	13.5704
chr9	5283830	5284253	424	5284080	30	10.4441	7.48248	6.79706
chr10	5285914	5286264	351	5286100	36	12.616	6.80226	6.5796
chr13	5296051	5296513	463	5296288	44	15.3438	12.9243	11.5143
chr18	5299103	5300157	1055	5299508	77	26.596	19.1673	21.7376
chr16	5300167	5300521	355	5300348	34	8.76439	9.86327	12.8662
chr8	5302954	5303256	303	5303160	19	6.31911	2.78736	6.01624
chrX	5305346	5305946	601	5305521	69	23.8682	18.7062	20.7025
chr1	5307309	5307840	532	5307771	16	5.79656	6.46214	4.24816
chr9	5307818	5308750	933	5308330	93	32.0515	21.7672	33.7205
chr7	5317446	5318066	621	5317813	35	12.2751	9.18305	10.2806
chr5	5322209	5323852	1644	5323371	69	23.5834	9.58365	8.77954
chr5	5322209	5323852	1644	5323371	69	23.5834	18.3568	8.77954
chr5	5322209	5323852	1644	5323371	69	23.5834	9.58365	9.02537
chr5	5322209	5323852	1644	5323371	69	23.5834	18.3568	9.02537
chr4	5324570	5325058	489	5324788	42	14.6619	7.8226	17.6827
chr18	5332616	5333246	631	5332827	59	15.0247	12.1606	17.5971
chr19	5336399	5336756	358	5336550	22	7.08766	5.605	8.49985
chr18	5337062	5337830	769	5337560	75	12.1824	11.4324	24.6735
chr3	5340627	5341181	555	5340990	29	10.2292	7.8226	6.99083
chr18	5340950	5341512	563	5341259	47	12.0197	9.86327	10.8798
chr2	5353415	5354218	804	5353855	60	20.7994	11.3806	21.3837
chrY	5355277	5355889	613	5355684	37	12.957	12.9243	13.1592
chr11	5355558	5357065	1508	5356558	101	31.4322	23.4678	28.6384
chr6	5359171	5359627	457	5359391	42	14.6619	10.2034	14.3929
chr15	5359964	5360678	715	5360226	43	15.0029	12.9243	12.748
chr11	5362455	5362734	280	5362586	22	7.8424	6.46214	5.75715
chrX	5365233	5365522	290	5365331	20	7.16045	6.12203	6.99083
chr16	5365826	5366762	937	5366335	57	14.5238	16.3254	25.496
chr7	5368444	5368797	354	5368565	17	5.54687	5.78192	7.40205
chr1	5377745	5378263	519	5378005	25	8.86532	5.69029	5.52066
chr2	5383693	5384047	355	5383848	29	7.51233	4.85009	6.83458
chr11	5399798	5400200	403	5400019	43	15.0029	7.96184	11.5143
chr12	5400226	5401712	1487	5401136	108	33.5894	33.3311	35.3654
chr6	5405576	5406378	803	5405799	32	11.2521	9.18305	5.75715
chr18	5406053	5406469	417	5406273	21	7.50143	6.80226	6.99083
chr6	5405576	5406378	803	5405799	32	11.2521	9.18305	8.2245
chr11	5409311	5409590	280	5409475	20	5.25863	5.10169	5.75715
chr15	5410609	5410988	380	5410822	32	11.2521	6.28927	7.24587
chr10	5412213	5412765	553	5412578	32	11.2521	5.44181	8.63573
chr9	5417932	5418297	366	5418078	35	12.2751	8.16271	13.9817
chr13	5418885	5419252	368	5419098	19	6.16319	4.76158	6.99083
chr5	5425992	5426902	911	5426442	92	31.7106	23.0606	32.898
chr4	5426246	5427207	962	5426775	48	15.0998	12.5842	12.3368
chr18	5436691	5437005	315	5436875	20	5.25863	3.64193	6.16838
chr16	5445216	5446249	1034	5445893	69	20.8221	11.5076	18.0939
chr16	5446520	5447319	800	5446918	30	10.5702	6.31268	8.23811
chr18	5447360	5447667	308	5447484	33	8.60264	8.16271	8.28099
chr2	5456890	5457766	877	5457325	62	21.4814	7.34939	19.3276
chr13	5457240	5457553	314	5457396	28	9.88824	6.46214	9.04696
chr17	5462336	5462722	387	5462530	23	6.3907	5.44181	6.55579
chr4	5462524	5462808	285	5462708	22	7.8424	3.74124	6.80539
chr15	5463203	5463808	606	5463465	43	13.559	11.2237	16.449
chr2	5477433	5478208	776	5477884	45	15.6848	10.8836	21.3837
chr15	5485898	5486615	718	5486188	42	14.6619	8.84293	9.45818
chr12	5487590	5487978	389	5487720	15	5.3905	5.44181	5.34593
chr2	5488671	5489039	369	5488835	24	8.52435	6.12203	7.5752
chr4	5491196	5491710	515	5491322	19	6.81948	4.76158	4.83058
chr17	5495138	5496406	1269	5495622	80	25.5924	20.0667	16.391
chrX	5497060	5497612	553	5497187	33	11.5931	8.84293	14.3929
chr19	5503788	5504767	980	5504254	102	34.7014	19.6664	18.7335
chr5	5507586	5508466	881	5508054	60	12.8643	12.9243	8.84118
chr3	5518207	5518474	268	5518403	16	4.77711	3.74124	6.21074
chr9	5522662	5523059	398	5522814	36	12.616	5.78192	13.1592
chr19	5522593	5523492	900	5523040	43	14.9228	14.076	13.5704
chr3	5524390	5524706	317	5524573	25	8.75957	8.84293	7.81328
chr5	5531649	5532009	361	5531880	36	9.26521	8.0862	6.44721
chr3	5537652	5538328	677	5538049	34	11.9341	8.25504	11.1031
chr15	5541448	5541974	527	5541611	26	9.2063	4.85591	9.04696
chr2	5541337	5542848	1512	5542083	113	28.5469	26.8689	23.4398
chr12	5542204	5542947	744	5542500	66	22.8453	12.2441	18.6322
chr11	5542810	5543306	497	5543005	26	8.47808	8.43042	8.13056
chr16	5551358	5552467	1110	5551813	99	22.0132	20.9642	26.8725
chr12	5552045	5552829	785	5552370	56	14.2734	12.2441	10.8798
chr16	5554921	5555681	761	5555213	64	22.1633	10.683	18.9164
chr2	5558041	5558441	401	5558223	37	12.957	6.58876	9.86941
chr11	5558895	5559941	1047	5559520	48	16.7077	5.3415	16.449
chr11	5558895	5559941	1047	5559520	48	16.7077	12.5599	16.449
chr2	5561918	5562474	557	5562259	37	12.957	8.16271	6.90083
chr1	5564945	5565274	330	5565129	33	8.51398	5.10739	6.99083
chr8	5571337	5571844	508	5571636	30	10.5702	6.12203	9.86941
chr15	5571695	5572070	376	5571895	33	11.5931	6.80226	8.63573
chr16	5580583	5582191	1609	5581088	99	34.0974	25.4566	23.1178
chr3	5586949	5587527	579	5587361	41	14.3209	7.48248	7.08027
chr2	5590362	5590677	316	5590541	17	6.13753	6.5747	5.75715
chr15	5593187	5593468	282	5593383	18	6.4785	6.12203	7.40205
chr6	5601127	5601610	484	5601360	19	6.81948	4.12752	5.34593
chr11	5602316	5603039	724	5602651	43	14.3482	10.2034	8.98526
chr18	5609449	5609929	481	5609668	33	11.5931	8.16271	12.7665
chr16	5611106	5611626	521	5611368	49	17.0487	7.2208	11.6116
chr2	5615017	5615708	692	5615279	49	16.8453	14.2847	15.5269
chr12	5615447	5615829	383	5615649	25	8.86532	6.03203	8.15985
chr11	5616220	5616549	330	5616380	25	8.75957	6.46214	6.90083
chr17	5617691	5618200	510	5617998	34	11.7917	11.2237	7.08027
chr9	5619066	5619683	618	5619475	33	11.5931	7.8226	14.8041
chr18	5620737	5621220	484	5620994	36	6.73934	7.8226	10.2806
chr11	5625824	5626420	597	5626192	50	8.17503	9.28416	10.1956
chr17	5629074	5630486	1413	5629698	101	34.3645	28.5695	36.0974
chr17	5640642	5641777	1136	5641078	49	17.0487	9.71182	11.9255
chr13	5642657	5642983	327	5642771	32	11.2521	8.50282	13.9817
chr10	5651371	5651633	263	5651441	14	5.11461	5.78192	9.45818
chr3	5653484	5653826	343	5653595	27	6.44284	7.08508	6.965
chr16	5658371	5658693	323	5658559	22	4.85049	5.10169	5.52066
chr10	5667159	5667587	429	5667382	30	6.53761	8.68518	9.31612
chr19	5668175	5668442	268	5668328	23	4.37146	5.95552	9.67082
chr6	5672224	5672487	264	5672311	16	5.79656	5.3908	5.34593
chr15	5677152	5677450	299	5677234	19	6.81948	4.42147	5.75715
chr2	5676803	5677383	581	5677053	54	18.7536	10.3056	16.0378
chr4	5682043	5682813	771	5682410	44	15.3438	4.93128	14.8368
chr19	5686940	5687729	790	5687310	61	16.5093	9.39131	10.6777
chr15	5690035	5690617	583	5690391	39	13.639	6.44098	12.748
chr2	5690653	5690950	298	5690789	22	4.85049	4.28714	5.52066
chr2	5691719	5692252	534	5692036	28	9.88824	8.84293	10.2806
chr6	5694236	5694519	284	5694385	21	7.50143	4.76158	7.40205
chrX	5695187	5695986	800	5695471	44	15.3438	11.2237	18.9164
chr15	5696710	5697374	665	5696955	38	13.298	8.16271	11.1031
chr15	5697590	5697852	263	5697651	17	5.54687	5.78192	4.48554
chr3	5698433	5699042	610	5698733	31	10.9112	7.8226	13.1592
chrX	5701916	5702207	292	5702085	22	7.8424	7.14237	6.99083
chr2	5706622	5706928	307	5706742	24	8.52435	4.61311	4.53137
chr10	5710609	5710888	280	5710797	20	7.16045	6.12203	5.34593
chr2	5712778	5714501	1724	5713657	176	44.3228	25.5187	49.7582
chr15	5714814	5715520	707	5715138	56	14.2734	20.7469	12.2488
chr8	5718274	5718543	270	5718369	20	7.16045	6.12203	5.34593
chr12	5720261	5720761	501	5720443	31	10.9112	5.58429	9.45818
chr9	5720732	5721477	746	5721141	65	22.5043	15.9853	23.8511
chr7	5721841	5722167	327	5721972	28	7.26192	4.82563	6.23064
chr5	5722067	5722787	721	5722437	48	16.7077	12.878	15.1818
chr11	5731390	5732488	1099	5731912	95	24.2898	13.7096	14.1773
chr2	5731760	5733038	1279	5732541	133	45.6905	24.5223	32.6834
chr7	5734814	5735677	864	5735254	96	33.0745	25.5085	28.3745
chr15	5749612	5749888	277	5749682	14	5.11461	6.12203	6.16838
chr10	5752227	5753398	1172	5752813	85	29.3238	20.0658	27.9633
chr9	5754127	5755019	893	5754592	49	17.0487	10.4821	10.0062
chr19	5758198	5758575	378	5758349	34	9.83522	11.904	5.04362
chr2	5761170	5761653	484	5761399	51	10.9663	15.3051	16.8602
chr6	5763260	5764219	960	5763752	84	28.9828	23.6596	29.6082
chr2	5783797	5784488	692	5784280	22	7.08766	6.80226	4.9347
chr19	5793864	5794531	668	5794101	43	8.01435	5.98798	6.67166
chr17	5796448	5796936	489	5796683	51	16.0243	10.683	14.8041
chr9	5796338	5796804	467	5796590	26	9.2063	7.14237	8.63573
chr2	5799106	5800405	1300	5800002	70	22.4328	13.6045	13.1592
chr11	5802637	5802958	322	5802792	24	7.56939	5.10473	5.38101
chr1	5804476	5804838	363	5804657	30	10.5702	5.09131	7.40205
chr18	5807950	5808356	407	5808188	21	7.50143	6.46214	10.2806
chr12	5807888	5808266	379	5808052	25	7.73391	6.58876	5.75715
chr13	5814528	5815820	1293	5815121	153	52.51	44.8949	47.2909
chr17	5828480	5828893	414	5828724	42	12.7907	7.8226	6.16838
chr3	5831312	5832156	845	5831727	39	13.639	8.16271	12.7665
chrY	5831517	5831971	455	5831761	146	46.1584	23.0689	39.3347
chr4	5835457	5836407	951	5835933	107	36.8252	22.4474	39.0664
chr6	5836402	5836716	315	5836569	23	8.18337	9.18305	7.93595
chr12	5840222	5841005	784	5840633	50	17.3897	11.5638	18.5051
chr4	5845617	5846075	459	5845848	29	10.2292	8.84293	11.5143
chr6	5846851	5847127	277	5846916	19	6.81948	5.0987	8.63573
chr17	5849528	5849952	425	5849720	28	8.62628	6.32864	6.23064
chr17	5856189	5856871	683	5856399	47	14.7917	14.1431	10.6777
chr19	5857438	5857816	379	5857626	27	5.10004	6.76187	6.8184
chr8	5857681	5858479	799	5858066	58	14.7743	8.77843	16.449
chr7	5861021	5861355	335	5861192	21	6.7795	5.98978	5.0978
chr13	5864631	5865015	385	5864820	30	9.55294	5.78192	6.99083
chr11	5866264	5866954	691	5866702	33	10.4774	6.23911	6.14776
chr13	5866934	5867755	822	5867321	48	14.5754	8.74063	13.2598
chr12	5868827	5869695	869	5869248	99	34.0974	28.9096	38.2439
chr3	5871504	5872324	821	5871892	67	23.1862	21.087	21.3837
chr18	5888363	5889898	1536	5889040	123	41.7764	36.3921	43.1786
chr13	5893515	5894278	764	5893858	45	15.6848	8.84293	12.3368
chr12	5903684	5903981	298	5903841	19	5.94916	5.98978	9.04696
chr10	5906742	5907065	324	5906879	23	8.18337	5.78192	6.99083
chr2	5907041	5907893	853	5907677	40	13.9799	11.904	11.9255
chr9	5908317	5909041	725	5908567	38	13.298	10.5435	9.04696
chr1	5908356	5908702	347	5908601	32	11.2521	7.48248	11.1031
chr19	5910306	5910645	340	5910464	32	9.9916	7.66702	9.10048
chr4	5912243	5912671	429	5912482	20	4.42871	7.8226	6.5796
chr16	5916320	5917500	1181	5916747	70	21.8793	17.3457	16.8602
chr1	5917110	5917583	474	5917456	26	9.2063	6.80226	8.63573
chr4	5918042	5918478	437	5918243	17	6.06432	6.46214	3.70103
chr15	5920133	5920424	292	5920200	17	6.13753	8.84293	7.40205
chr2	5921186	5921465	280	5921322	17	6.13753	4.12752	8.62603
chr12	5922012	5922577	566	5922152	23	7.58294	5.09131	9.04696
chr3	5932204	5932615	412	5932378	27	9.54727	9.18305	10.6919
chr16	5936820	5937238	419	5937061	40	13.9799	10.5435	11.5143
chr11	5940731	5943152	2422	5942401	235	80.4698	56.0044	64.9753
chr13	5944639	5945444	806	5945084	56	19.4355	18.7062	17.2715
chr12	5947301	5948092	792	5947664	32	10.1693	8.50282	17.2715
chr8	5953011	5953299	289	5953161	16	5.79656	5.3908	4.81458
chr6	5967900	5968560	661	5968230	35	12.2751	10.1826	12.748
chrX	5970544	5971254	711	5970783	26	9.2063	6.46214	6.16838
chr11	5972522	5973480	959	5972954	58	18.1814	16.1724	8.64621
chr2	5978872	5979161	290	5979014	17	6.13753	5.10169	5.75715
chr19	5980961	5982249	1289	5981377	74	18.7808	17.6859	18.0939
chr7	5981092	5981385	294	5981240	33	11.5931	7.14237	9.86941
chr19	5985114	5986260	1147	5985675	98	32.2834	17.1486	33.2851
chrY	5995050	5995364	315	5995268	29	7.51233	4.64561	5.17706
chr2	6023828	6024409	582	6024190	33	10.4774	9.86327	7.59091
chr11	6024803	6025067	265	6024880	20	3.82503	9.52316	6.79988
chr4	6027123	6028020	898	6027634	72	24.8911	12.9243	27.1409
chr18	6036486	6037132	647	6036700	22	7.8424	5.47483	6.55579
chr4	6037093	6037649	557	6037206	24	8.52435	4.42147	5.75715
chr2	6038057	6038641	585	6038385	35	12.2751	6.80226	12.748
chr18	6040123	6040931	809	6040506	77	26.596	15.8729	19.7388
chrX	6040671	6041242	572	6040819	33	11.5931	7.14237	11.1031
chr17	6041401	6041790	390	6041635	40	13.9799	7.04107	10.3512
chr19	6041188	6042050	863	6041675	63	16.0263	14.6249	10.762
chr13	6048949	6049656	708	6049375	48	16.7077	10.5435	17.2715
chr3	6054615	6054888	274	6054736	17	6.13753	5.78192	6.90083
chr6	6057361	6057759	399	6057582	39	13.639	7.55354	6.965
chr15	6058618	6059112	495	6058892	29	10.2292	6.12203	13.1592
chr4	6068313	6068620	308	6068515	21	7.50143	4.85591	7.40205
chr2	6078431	6079456	1026	6079212	29	5.62852	5.28351	9.67082
chr18	6081705	6082565	861	6082323	41	8.85741	10.2545	8.49633
chr7	6082674	6083123	450	6082873	74	15.8168	18.3568	13.2095
chr6	6082748	6083052	305	6082878	21	7.50143	8.16271	6.16838
chr1	6101922	6102833	912	6102349	69	23.8682	14.965	18.0939
chr19	6102829	6103724	896	6103232	56	14.2734	12.7568	9.9031
chr12	6103265	6104564	1300	6103827	150	46.532	38.7729	61.6838
chr2	6108758	6109948	1191	6109233	96	33.0745	22.4474	28.3745
chr15	6118310	6118868	559	6118707	28	9.88824	7.8226	10.6919
chr11	6121746	6122037	292	6121808	23	7.39582	6.11893	4.93112
chr18	6122316	6122930	615	6122560	48	16.7077	12.2441	13.5704
chr11	6126843	6127775	933	6127265	86	26.8099	7.60877	20.5463
chr1	6127562	6128135	574	6128004	27	7.01151	8.0862	8.42273
chr4	6128760	6129027	268	6128847	13	4.77363	7.8226	7.62056
chr1	6143346	6143612	267	6143488	16	4.25699	7.14237	8.63573
chr5	6147436	6147803	368	6147613	30	7.76274	11.2237	6.16838
chr2	6154165	6155074	910	6154652	93	31.6692	22.4474	16.449
chrY	6154815	6155559	745	6155061	120	25.5299	12.8565	27.6198
chr7	6157253	6158157	905	6157778	39	6.41179	14.2847	10.3274
chr14	6161341	6161944	604	6161735	62	7.42611	6.29486	14.1773
chr14	6163280	6164004	725	6163656	142	22.9221	18.3624	20.507
chr16	6167083	6167644	562	6167460	41	13.2701	10.2034	17.2465
chr3	6169757	6170079	323	6169882	20	7.16045	5.78192	11.1031
chr1	6172302	6172621	320	6172531	21	4.00718	6.12449	7.40205
chr13	6179047	6179794	748	6179449	37	12.957	10.2034	9.34596
chr6	6187282	6187675	394	6187524	30	10.5702	6.80226	6.05469
chr1	6187636	6188600	965	6188173	67	23.1862	13.9446	18.9164
chr19	6191866	6192256	391	6192055	37	12.957	10.2034	10.0062
chr15	6194929	6195475	547	6195293	43	13.559	10.7816	17.5426
chr16	6196002	6196466	465	6196239	26	9.2063	5.3908	7.40205
chr11	6203640	6204191	552	6203747	24	8.25838	8.01225	8.26152
chr18	6206152	6206701	550	6206413	30	9.55294	7.04107	7.93595
chr10	6208046	6208312	267	6208202	15	5.45558	6.12203	5.75715
chr18	6209765	6210629	865	6210231	25	8.75957	4.79182	9.04696
chr17	6211566	6212406	841	6211991	76	19.2816	17.3704	18.6277
chr8	6214174	6215171	998	6214696	81	27.9599	18.7062	17.5971
chr4	6218655	6218939	285	6218715	18	6.4785	6.80226	5.66422
chr7	6224357	6225357	1001	6224730	63	13.497	17.4929	23.8511
chr6	6225550	6226447	898	6225969	44	13.8672	11.904	16.0378
chr17	6227803	6228100	298	6227971	33	6.15182	4.40293	5.00375
chr7	6229051	6229692	642	6229449	58	20.1175	15.6452	9.91238
chr15	6229584	6230388	805	6230005	55	19.0945	13.2644	15.6266
chr18	6232210	6232753	544	6232577	25	8.01214	6.12203	6.05469
chr11	6243973	6244564	592	6244345	48	16.7077	6.63524	7.81328
chr16	6244128	6244455	328	6244320	28	9.88824	4.69544	9.87691
chr10	6244768	6245500	733	6245060	48	16.7077	10.8836	21.3837
chr7	6244890	6245394	505	6245320	18	5.85503	6.80226	5.17562
chrY	6246499	6246936	438	6246707	137	19.7513	10.1475	17.9812
chr5	6254816	6255738	923	6255250	87	30.0057	21.087	32.4868
chr11	6256374	6257473	1100	6256759	72	15.395	20.6111	22.3267
chr3	6258663	6258943	281	6258826	26	9.2063	8.50282	11.5143
chr4	6260794	6261144	351	6260942	32	11.2521	5.10169	10.2806
chr9	6270722	6271068	347	6270898	22	7.8424	6.12203	10.2806
chr3	6271453	6273362	1910	6272398	163	55.9197	39.113	60.0389
chr17	6275202	6275672	471	6275464	51	13.0214	8.49784	12.1094
chr1	6278183	6278457	275	6278344	24	6.26028	7.48248	6.16838
chr6	6280183	6280564	382	6280390	32	11.1179	6.03203	7.94678
chr7	6282193	6282494	302	6282314	22	7.8424	7.48248	8.2245
chr6	6293296	6293607	312	6293477	18	5.6517	4.42147	5.34593
chr2	6293881	6294173	293	6294095	19	6.81948	5.10169	5.17562
chr17	6295388	6296447	1060	6295929	25	8.86532	8.84293	7.81328
chr8	6299563	6300665	1103	6300096	100	34.4384	25.8486	33.3092
chr1	6301488	6301871	384	6301702	34	10.7856	5.51204	12.748
chr7	6306221	6307274	1054	6306791	116	36.0546	29.2497	30.0194
chr19	6308886	6309497	612	6309077	49	13.314	11.0403	5.89412
chr4	6313123	6314019	897	6313667	38	13.298	9.52316	8.63573
chr15	6314117	6315301	1185	6314508	105	36.1432	31.2904	31.2531
chr14	6317242	6317652	411	6317445	51	15.4678	6.49401	15.2565
chr16	6335127	6335869	743	6335403	36	12.616	7.54004	13.5704
chr10	6335694	6336041	348	6335866	23	8.18337	6.12203	6.5796
chr18	6335734	6336418	685	6335912	37	12.957	9.18305	13.9817
chr15	6336295	6337167	873	6336671	53	13.5222	13.9446	16.907
chr12	6338180	6338479	300	6338300	21	7.50143	6.44098	6.05469
chr14	6346671	6347233	563	6347005	28	9.88824	8.16271	11.3665
chrX	6346766	6347093	328	6346966	22	7.8424	6.28927	8.63573
chr13	6349674	6350492	819	6350045	61	19.1059	13.9446	17.2715
chr16	6349743	6350008	266	6349947	15	5.45558	4.76158	6.01624
chr15	6351399	6352777	1379	6351811	99	34.0974	20.4068	15.8598
chr18	6358282	6358551	270	6358517	16	5.79656	6.80226	9.45818
chr8	6363462	6363747	286	6363561	21	4.00718	4.42147	4.9347
chr12	6364169	6364747	579	6364376	45	15.6848	8.98467	19.3276
chr7	6364820	6365597	778	6365199	47	16.3667	15.4658	15.6266
chr18	6365472	6366012	541	6365623	32	10.1693	7.8226	12.0764
chr4	6369093	6369830	738	6369438	52	18.0716	14.965	16.8602
chr18	6369056	6369897	842	6369475	82	28.3008	10.4402	18.9164
chr1	6369134	6369510	377	6369310	28	9.88824	5.44181	6.90083
chr18	6372462	6372884	423	6372712	14	5.0536	3.60778	7.59091
chr4	6373048	6373957	910	6373476	75	25.914	12.9243	22.6174
chr19	6379196	6379786	591	6379433	49	15.408	6.32864	11.2198
chr4	6379076	6379940	865	6379462	49	17.0487	11.2237	11.1031
chr12	6379934	6380554	621	6380156	31	10.9112	7.8226	9.45818
chr5	6384115	6384566	452	6384356	36	12.616	7.14237	9.86941
chr16	6387219	6388203	985	6387582	86	29.6647	14.5677	12.3009
chr4	6389491	6389840	350	6389688	22	7.8424	5.44181	5.75715
chr6	6391919	6392639	721	6392224	39	13.639	7.48248	12.4215
chr5	6401949	6402280	332	6402156	23	8.08576	4.42147	5.52066
chr15	6403879	6405116	1238	6404512	111	34.5138	26.5288	38.2439
chr5	6406366	6408452	2087	6407517	199	68.1948	46.1213	59.2164
chr11	6410403	6411279	877	6410950	68	20.5246	15.3638	13.3109
chrY	6411704	6412044	341	6411861	43	5.72036	3.96808	5.67214
chr7	6416978	6417843	866	6417406	60	14.702	11.9158	17.2715
chr11	6418974	6419689	716	6419431	32	6.95939	6.31268	3.46427
chr12	6422482	6423723	1242	6423126	101	34.7793	21.4271	34.1317
chr17	6427148	6427966	819	6427468	85	15.6644	11.6365	14.3858
chr4	6431151	6433237	2087	6431855	188	43.4892	40.5542	30.2385
chr4	6434244	6435058	815	6434691	45	15.6848	7.2208	17.2715
chr17	6439736	6440240	505	6440055	24	5.7787	4.11945	5.2838
chr8	6442432	6443624	1193	6443168	146	50.1232	40.8135	45.2348
chr6	6449031	6449296	266	6449096	18	6.4785	5.44181	7.81328
chr17	6451266	6452213	948	6451730	135	11.8498	15.3305	22.7282
chr16	6453118	6453483	366	6453253	33	11.5931	8.16271	6.99083
chr9	6454450	6454752	303	6454627	25	8.01214	8.50282	9.86941
chr11	6456483	6456819	337	6456659	17	6.13753	5.3908	5.75715
chr3	6461363	6461643	281	6461500	20	5.25863	4.37032	11.5143
chr17	6471740	6472369	630	6472196	54	8.99093	6.03482	6.5623
chr4	6472629	6473470	842	6473061	64	16.2767	16.2673	18.4498
chr7	6473300	6473791	492	6473419	15	5.45558	4.08135	7.40205
chr14	6477394	6478019	626	6477761	91	19.4019	8.9815	11.8839
chr17	6478097	6478566	470	6478306	64	4.49191	7.04678	8.73566
chr4	6484662	6485350	689	6485133	16	5.23871	6.80226	4.11225
chr8	6493678	6493959	282	6493824	22	4.85049	6.58876	5.75715
chrX	6501811	6502143	333	6501995	26	9.2063	5.10169	7.81328
chr13	6504338	6505117	780	6504714	68	21.263	15.2739	17.2715
chr10	6514023	6514308	286	6514184	17	6.13753	3.40113	7.40205
chrY	6514781	6515239	459	6515011	44	9.65495	4.11622	9.95924
chr19	6521895	6522628	734	6522263	60	19.2733	14.1356	14.2947
chr12	6523115	6523459	345	6523337	26	9.2063	5.82709	6.05469
chr18	6523970	6525098	1129	6524492	87	30.0057	20.4068	35.7766
chr11	6535179	6535732	554	6535412	32	8.78722	5.0987	7.09903
chr11	6541584	6542466	883	6541973	82	26.3884	16.4367	22.6174
chr10	6545497	6545797	301	6545559	23	8.18337	5.10169	9.45818
chr13	6545959	6546743	785	6546337	55	17.2569	14.6249	21.3837
chr18	6546342	6546747	406	6546574	34	8.76439	6.03203	8.97107
chr6	6548216	6548718	503	6548471	21	6.7795	4.50868	7.81328
chr10	6551115	6551451	337	6551292	24	8.52435	5.44181	14.3929
chrY	6553878	6554288	411	6554069	78	13.8024	9.29121	13.9754
chr18	6553942	6554253	312	6554060	26	9.2063	6.31268	10.0271
chr13	6559531	6559859	329	6559684	28	9.88824	8.16271	7.40205
chr9	6559689	6560250	562	6560003	30	10.5702	8.16271	9.86941
chr11	6559270	6559907	638	6559698	38	9.76603	8.68518	8.70362
chrY	6561879	6562359	481	6562114	243	21.2599	29.5354	41.4894
chr19	6563350	6565628	2279	6564618	231	78.1623	61.5604	56.9318
chrY	6564910	6565212	303	6565109	44	6.44065	4.80046	5.32253
chr3	6564860	6565231	372	6565053	17	6.13753	5.78192	5.75715
chr15	6568803	6569112	310	6568978	21	7.50143	5.09131	6.21074
chr1	6570110	6570702	593	6570336	37	12.957	6.80226	7.40205
chr2	6577338	6580137	2800	6578956	259	88.6532	70.7435	66.6185
chr6	6579560	6579961	402	6579761	27	9.54727	4.61311	3.79545
chr6	6579560	6579961	402	6579761	27	9.54727	4.61311	3.45041
chrX	6583225	6584306	1082	6583815	67	23.1862	15.9853	18.5051
chr7	6585426	6586483	1058	6586026	105	35.7121	28.2294	27.2736
chr12	6587593	6588006	414	6587819	29	9.24478	5.78192	7.40205
chr16	6590463	6591424	962	6590948	82	28.3008	19.7265	23.6639
chr7	6591302	6591589	288	6591344	23	7.39582	5.78192	9.04696
chrY	6594416	6595108	693	6594575	92	16.0825	6.25232	18.0896
chr2	6595450	6596326	877	6595941	27	9.54727	7.8226	7.40205
chr17	6598747	6599499	753	6599077	85	13.7853	10.7431	10.4989
chr19	6605755	6606032	278	6605903	18	6.4785	6.93684	5.74116
chr15	6607266	6607529	264	6607383	18	6.00316	5.44181	6.5796
chr17	6611456	6611735	280	6611554	31	6.11668	5.45963	8.04652
chr19	6615811	6616077	267	6615851	13	4.77363	5.44181	6.5796
chr6	6615854	6616410	557	6615951	26	9.2063	6.46214	10.2806
chr8	6616711	6617528	818	6617124	71	24.5501	16.6655	21.0318
chrY	6621126	6622261	1136	6622094	85	25.8845	15.5389	27.6033
chr17	6622977	6623899	923	6623480	148	28.4808	22.3669	23.0156
chrY	6625663	6626679	1017	6626242	167	51.7708	19.8212	29.7371
chr15	6629002	6629580	579	6629357	37	12.957	6.88825	7.59091
chr11	6636854	6637878	1025	6637358	146	26.7752	31.9706	37.3007
chr10	6638023	6638385	363	6638202	26	9.2063	5.10169	10.2806
chr8	6638420	6638753	334	6638581	24	5.27227	6.12203	6.99083
chr4	6639236	6639974	739	6639681	30	10.5702	7.48248	11.0413
chr19	6639833	6640855	1023	6640603	27	9.54727	8.84293	7.81328
chr19	6639833	6640855	1023	6640603	27	9.54727	5.44181	7.81328
chr14	6641799	6642177	379	6641992	43	11.0181	8.68191	8.90847
chr17	6644344	6645462	1119	6644917	122	27.0762	12.2334	22.0959
chr11	6644550	6645380	831	6644854	48	15.0998	7.34939	6.2625
chr4	6646158	6646457	300	6646322	24	8.42266	5.3908	8.2245
chr9	6654406	6655142	737	6654761	44	15.3438	8.16271	11.9255
chr17	6658100	6658752	653	6658536	59	15.8935	11.6542	13.5725
chr13	6660189	6660486	298	6660400	19	5.62013	6.46214	7.59091
chr6	6665473	6665813	341	6665601	36	9.26521	8.38569	10.2806
chr15	6669788	6670726	939	6670372	47	16.3667	7.8226	21.3837
chr5	6678199	6678582	384	6678377	22	7.08766	9.18305	9.04696
chr14	6679091	6679668	578	6679311	82	28.3008	17.6699	27.9633
chr11	6682735	6684105	1371	6683484	91	30.9954	21.087	23.4628
chr15	6683122	6683407	286	6683244	41	5.91435	6.86857	4.97881
chr19	6687665	6687941	277	6687877	17	5.54687	7.14237	5.75715
chr8	6694218	6694508	291	6694339	16	5.23871	6.46214	6.21074
chr15	6697796	6698248	453	6698023	40	13.8132	10.2034	10.2806
chr10	6708014	6708776	763	6708312	49	17.0487	10.2034	18.9164
chr15	6718589	6719016	428	6718773	17	6.13753	5.44181	4.56328
chr9	6722709	6723182	474	6722885	26	9.2063	7.78671	9.04696
chr9	6725794	6726634	841	6726205	65	22.5043	17.6859	16.8602
chr15	6728956	6729599	644	6729288	46	15.8346	12.9243	11.0479
chr4	6728671	6729253	583	6729091	33	11.5931	14.2847	15.2153
chr13	6735105	6735397	293	6735280	18	6.4785	5.10169	6.16838
chr11	6736389	6737593	1205	6737071	163	41.0674	38.0926	23.7771
chr6	6751417	6752193	777	6751760	38	13.298	10.2034	16.0378
chr11	6752135	6752488	354	6752318	28	9.88824	6.80226	6.5796
chr3	6766463	6766781	319	6766632	24	8.52435	4.42147	8.63573
chr17	6771825	6772117	293	6771939	24	8.52435	6.46214	6.21074
chr8	6774898	6775382	485	6775166	16	5.79656	5.10169	7.40205
chr2	6776807	6777306	500	6776991	33	9.55422	9.46779	3.00245
chr9	6780575	6780873	299	6780756	25	6.51069	5.0987	9.04696
chr16	6783120	6783399	280	6783230	23	6.00987	3.88473	6.5796
chr1	6785475	6786376	902	6785912	60	20.7994	10.8836	8.28099
chr10	6792078	6792389	312	6792265	24	8.52435	5.78192	7.40205
chr3	6796315	6797234	920	6796741	33	11.5931	7.14237	13.1592
chr18	6798633	6799004	372	6798831	40	13.8132	8.50282	11.9255
chr15	6804392	6804784	393	6804589	38	13.298	9.52316	15.2153
chr4	6808569	6809385	817	6808933	79	27.2779	19.0463	24.6735
chr8	6810070	6810529	460	6810304	37	12.957	12.2441	13.9817
chrY	6813317	6813767	451	6813513	157	5.65479	6.22373	6.00539
chr19	6819940	6820429	490	6820113	21	6.7795	5.10169	6.14776
chr8	6820394	6821176	783	6820791	29	9.24478	7.8226	12.748
chr2	6820725	6821035	311	6820877	24	8.52435	4.76158	8.2245
chr3	6823406	6823842	437	6823598	21	7.50143	4.42147	8.2245
chr19	6825112	6826070	959	6825603	98	24.7907	27.8893	30.8419
chr13	6825486	6825830	345	6825654	37	6.0912	3.06932	7.08131
chr14	6844496	6844999	504	6844722	38	9.76603	8.98343	17.2235
chr18	6847162	6847454	293	6847288	28	9.77029	4.57904	8.2245
chr8	6852991	6853314	324	6853136	20	7.16045	8.16271	5.66422
chr18	6856169	6856549	381	6856347	25	6.51069	3.88473	7.40205
chr17	6856269	6857053	785	6856627	51	9.47151	12.5842	14.8041
chr5	6857393	6858023	631	6857825	48	16.7077	14.9744	15.6266
chr8	6858707	6858973	267	6858809	16	3.58514	5.10169	9.04696
chr13	6863360	6863678	319	6863450	26	8.3203	6.46214	8.2245
chr18	6867619	6867943	325	6867733	18	6.4785	5.38832	4.08293
chr15	6871594	6872027	434	6871787	33	10.4774	8.50282	6.16838
chr19	6871607	6873247	1641	6872437	217	74.3323	61.2203	53.7268
chr1	6881867	6882157	291	6882076	20	5.25863	5.09131	6.99083
chr12	6882991	6883782	792	6883314	32	11.2521	7.48722	12.748
chr13	6883038	6883609	572	6883396	44	13.8672	8.38569	13.2357
chr6	6888217	6888800	584	6888403	25	8.86532	7.14237	9.04696
chrY	6890173	6891649	1477	6890969	129	20.9813	11.7405	27.1521
chr12	6895201	6896112	912	6895609	46	16.0258	10.7816	14.8368
chr14	6895660	6895929	270	6895747	22	4.85049	3.90431	6.26892
chr11	6897235	6897669	435	6897491	48	16.7077	9.18305	10.0062
chrY	6904653	6905332	680	6904851	29	2.07319	3.36782	2.09703
chr10	6909025	6909890	866	6909406	57	19.7765	18.026	23.8511
chr19	6914257	6914792	536	6914479	50	12.771	6.86857	14.6197
chr6	6915112	6916840	1729	6915855	214	66.2542	60.5401	50.376
chr12	6919756	6920541	786	6920197	76	23.7283	13.5965	27.9633
chr4	6921063	6921976	914	6921466	86	29.6647	18.026	24.2623
chr11	6922577	6922917	341	6922703	21	7.50143	6.23911	5.34593
chr13	6924992	6925511	520	6925161	25	8.86532	5.44181	12.3368
chr12	6926462	6927206	745	6926922	64	16.2767	15.6452	18.0939
chr10	6926801	6928016	1216	6927295	133	41.2933	34.3514	25.8781
chr16	6938660	6939198	539	6939050	36	12.616	7.8226	9.04696
chr6	6940524	6941089	566	6940869	51	17.7306	8.16271	11.1031
chr10	6941713	6942613	901	6942180	52	18.0716	13.2644	17.6827
chr15	6945523	6946160	638	6945771	34	8.76439	6.46214	8.2245
chr18	6952449	6953083	635	6952678	44	15.3438	9.86327	12.748
chr18	6959567	6960348	782	6959944	61	21.1404	15.3051	16.0378
chr8	6982549	6982994	446	6982783	21	7.50143	5.10169	7.24587
chrY	6985736	6986296	561	6985992	43	3.20651	4.47085	3.39193
chr6	6988762	6989074	313	6988874	24	8.52435	5.78192	6.16838
chr5	6997397	6998026	630	6997651	32	11.2521	6.06988	13.9817
chr12	6998830	6999244	415	6999019	37	12.957	7.48722	10.2806
chr2	7000456	7001155	700	7000852	55	11.8099	11.7854	13.9817
chr13	7002314	7002992	679	7002786	58	20.1175	5.98798	18.9164
chr12	7014391	7014725	335	7014566	20	7.16045	5.44181	7.40205
chrY	7017020	7017392	373	7017195	87	3.75254	7.21753	3.20728
chr17	7017171	7017895	725	7017596	74	25.573	18.0347	23.0286
chr19	7018684	7019353	670	7019096	28	6.11583	7.54004	9.31612
chr16	7019232	7019859	628	7019652	34	11.9341	6.12203	6.16838
chr13	7025196	7025525	330	7025382	28	9.88824	7.8226	9.45818
chr11	7029063	7029644	582	7029415	41	12.9427	8.84293	15.6266
chr6	7035341	7035612	272	7035406	17	3.79603	5.44181	8.63573
chr1	7038785	7039440	656	7039195	51	17.7306	12.5842	13.5704
chr18	7039797	7040666	870	7040212	87	30.0057	29.2497	28.7858
chr15	7041284	7041628	345	7041488	38	9.76603	11.5638	11.3284
chrY	7043525	7045013	1489	7044235	132	11.4377	10.9681	7.52575
chr11	7043906	7044475	570	7044144	35	12.2751	8.0862	11.5143
chr11	7045943	7046762	820	7046204	54	16.9488	15.2739	19.3276
chr2	7049741	7050924	1184	7050281	186	63.7621	45.5751	45.8905
chr18	7050565	7052412	1848	7051533	210	71.9455	31.8473	52.1012
chr8	7052462	7053037	576	7052691	34	11.9341	5.09131	11.9255
chr19	7057368	7058335	968	7057829	68	23.5272	18.026	16.05
chr11	7069365	7070173	809	7069752	54	18.5299	8.65868	12.5363
chr12	7070965	7071491	527	7071364	25	8.86532	5.10169	11.9255
chrY	7071813	7072434	622	7072042	75	23.4201	12.5282	12.9693
chr17	7075475	7077088	1614	7076274	224	66.928	54.4181	53.712
chr19	7078381	7079157	777	7078799	54	12.1073	15.8729	10.5676
chr9	7078463	7079765	1303	7079018	85	29.3238	15.6452	29.6082
chr11	7079897	7080472	576	7080277	30	10.5702	9.18305	9.45818
chr8	7080972	7081284	313	7081146	27	7.01151	7.48248	6.99083
chr6	7081668	7082996	1329	7082327	128	43.9856	33.6712	39.8888
chr5	7086256	7086712	457	7086502	30	10.5702	7.14237	3.86801
chr10	7090020	7090501	482	7090248	27	8.62846	8.16271	7.40205
chr6	7090598	7091513	916	7091062	43	15.0029	8.0862	11.5143
chr10	7095131	7095698	568	7095310	38	9.76603	12.5842	9.86941
chr4	7096972	7097235	264	7097093	24	5.27477	3.87884	3.84276
chr11	7097767	7098095	329	7097968	20	6.47134	5.78192	5.52397
chr2	7100445	7101043	599	7100880	35	12.2751	7.8226	6.79706
chr18	7104753	7105532	780	7105174	46	16.0258	6.12203	18.6322
chr19	7105408	7106138	731	7105871	50	12.771	12.0006	12.0764
chr18	7107521	7107888	368	7107636	30	10.4441	3.87458	8.70362
chr8	7108860	7109448	589	7109209	27	9.54727	7.52666	14.3929
chr16	7126981	7127299	319	7127067	18	6.4785	3.26639	5.21407
chr13	7129715	7130103	389	7129888	28	8.93662	7.48722	4.16979
chr17	7136255	7138424	2170	7137070	240	74.2664	43.0756	71.9644
chr17	7136255	7138424	2170	7137070	240	74.2664	43.0756	4.52348
chr11	7138334	7139087	754	7138816	40	10.2668	9.26872	8.97107
chr4	7142178	7143486	1309	7142886	166	56.9427	41.9285	50.9919
chr1	7143536	7143890	355	7143670	29	10.2292	7.14237	8.2245
chr1	7146890	7147253	364	7147032	29	10.2292	6.46214	7.81328
chr2	7147673	7148347	675	7147960	43	14.8239	8.9545	13.5704
chr16	7160397	7161701	1305	7161067	130	44.6676	35.7118	47.2909
chr7	7160712	7161029	318	7160833	25	8.86532	6.80226	9.45818
chr2	7166887	7167811	925	7167351	65	22.5043	10.8836	20.0124
chr6	7171058	7171677	620	7171269	56	17.5651	12.9243	18.0939
chr6	7172324	7172715	392	7172548	19	6.81948	4.85591	7.81328
chr19	7174810	7175132	323	7174928	16	5.37125	5.95846	5.52066
chr19	7176627	7177697	1071	7177212	99	26.6279	32.3107	27.5521
chr9	7186445	7186973	529	7186677	28	9.88824	5.44181	5.34593
chr9	7189655	7190217	563	7189884	32	11.2521	8.84293	9.66116
chr10	7192290	7192804	515	7192490	47	16.3667	14.6249	14.1467
chr13	7198342	7199261	920	7198796	71	24.5501	20.3652	20.5613
chr14	7198428	7199192	765	7198746	65	19.405	9.39088	13.93
chr19	7204894	7205293	400	7205127	40	11.3332	7.42569	5.8377
chr17	7205364	7205656	293	7205502	26	5.69405	5.10169	6.8184
chrY	7207037	7207378	342	7207158	30	10.5702	5.3415	5.11393
chr10	7209421	7209686	266	7209497	15	5.45558	7.48248	4.48554
chr11	7214811	7215365	555	7214939	23	7.39582	7.94069	7.94678
chr7	7221866	7222194	329	7222000	34	7.38118	6.53279	7.08027
chr11	7225374	7226754	1381	7226316	56	19.4355	11.7625	13.8017
chr1	7227889	7228813	925	7228383	100	34.4384	28.2294	34.1317
chr9	7232863	7233168	306	7232981	24	8.52435	4.42147	6.99083
chr12	7236171	7236530	360	7236358	22	7.8424	5.44181	6.16838
chr1	7239687	7240067	381	7239866	40	13.9799	6.12449	9.45818
chr18	7241335	7241661	327	7241515	26	8.3203	4.76158	6.5796
chr19	7244140	7244931	792	7244544	40	8.64652	8.74063	7.20518
chr11	7246478	7247189	712	7246942	48	16.7077	12.2441	17.2715
chr1	7248852	7249282	431	7249082	37	12.957	5.51204	11.9255
chr4	7257483	7258518	1036	7257831	67	20.9548	17.3457	21.7949
chr10	7272869	7273729	861	7273271	67	23.1862	14.4407	21.7949
chr3	7276628	7276902	275	7276728	15	5.45558	6.80226	7.81328
chr15	7283953	7285649	1697	7284805	186	63.7621	49.9966	64.5624
chr16	7286185	7286585	401	7286382	22	7.8424	5.44181	9.86941
chrX	7290987	7291269	283	7291132	14	5.11461	5.78192	6.5796
chr7	7291531	7292133	603	7291915	50	17.3897	8.50282	12.4215
chr6	7293666	7294276	611	7293924	41	14.3209	7.8226	11.1031
chr17	7297767	7298118	352	7297991	22	6.12442	6.12203	4.80345
chr18	7301912	7302362	451	7302101	25	8.86532	7.14237	7.59091
chr10	7309092	7309608	517	7309320	56	14.2734	15.3051	6.72483
chr2	7310277	7310672	396	7310435	42	14.6619	8.50282	8.97107
chr13	7310777	7311989	1213	7311453	85	15.6644	15.5389	12.489
chr3	7311828	7312090	263	7311967	15	5.05529	5.10169	6.55579
chr16	7314282	7314614	333	7314398	17	6.13753	5.09131	9.04696
chr8	7314661	7314939	279	7314763	23	8.18337	6.58876	10.2806
chr19	7315456	7315779	324	7315604	30	10.3074	10.5435	6.47133
chr6	7328452	7329056	605	7328623	39	13.639	9.18305	10.8078
chr16	7331888	7332417	530	7332116	43	15.0029	8.50282	13.5704
chr1	7333925	7334431	507	7334235	17	4.5074	4.19285	4.48554
chr2	7334580	7335162	583	7334736	47	16.3667	9.52316	9.34596
chr10	7337160	7338338	1179	7337730	125	42.9627	35.7118	19.2138
chr7	7339142	7339872	731	7339467	59	20.4584	13.9446	16.0378
chr19	7354188	7354466	279	7354243	17	3.2786	3.97034	5.0978
chr17	7360585	7360891	307	7360779	34	10.7856	8.84293	12.1781
chr12	7361775	7362332	558	7362075	53	18.4126	12.2441	15.2153
chr8	7363098	7363398	301	7363299	19	6.81948	6.12203	6.5796
chr17	7365740	7366131	392	7365913	35	11.9699	8.38569	6.5796
chr9	7367000	7368370	1371	7367737	165	56.6017	37.4124	54.2817
chr10	7368020	7368840	821	7368431	59	20.4584	12.5842	16.0378
chr16	7369214	7369612	399	7369436	31	10.9112	7.14237	11.5143
chr1	7369608	7370112	505	7370017	23	7.39582	6.12203	9.86941
chr10	7375665	7376018	354	7375827	32	11.2521	7.8226	10.6919
chr14	7377953	7378379	427	7378153	49	13.3841	7.20728	8.16587
chr17	7378766	7379557	792	7379132	54	18.5299	6.79827	13.1116
chr6	7380654	7381131	478	7380915	28	9.88824	5.0987	6.5796
chr17	7381102	7381753	652	7381527	37	12.957	5.69029	9.45818
chr18	7386065	7387023	959	7386509	84	17.9257	20.7469	24.6735
chr10	7391261	7391602	342	7391421	36	11.006	10.2034	10.2806
chr6	7391552	7392495	944	7392059	70	24.2092	17.6859	28.3745
chr7	7405585	7406011	427	7405818	29	10.1072	7.14237	6.90083
chr2	7408650	7409118	469	7409013	21	5.50904	7.78671	4.81458
chr10	7415934	7416254	321	7416084	33	11.5931	5.44181	6.5796
chr12	7417436	7418735	1300	7417946	106	32.973	21.087	28.3745
chr11	7417822	7418975	1154	7418528	77	26.2787	14.5677	18.2872
chr12	7417436	7418735	1300	7417946	106	32.973	21.087	4.52348
chr16	7422537	7423565	1029	7423134	43	11.0181	6.46214	15.2153
chr8	7425489	7425909	421	7425730	32	11.2521	6.46214	6.5796
chr11	7426993	7428360	1368	7427762	163	50.5381	38.3346	36.8174
chr19	7427785	7428618	834	7428133	63	19.7222	12.5599	17.5971
chr17	7429550	7429832	283	7429727	20	5.25863	5.44181	7.93595
chr15	7432528	7433149	622	7432722	31	9.8611	11.0811	11.9255
chr10	7433139	7433418	280	7433183	21	7.50143	4.76158	6.5796
chr1	7442411	7442749	339	7442539	24	8.52435	6.46214	9.04696
chr18	7443153	7443756	604	7443408	53	18.4126	14.076	13.5704
chr8	7443479	7444148	670	7443699	68	23.5272	14.6249	19.7388
chr9	7443752	7444020	269	7443837	16	5.79656	5.78192	6.5796
chr3	7447051	7447924	874	7447470	72	24.8911	21.087	22.6174
chr15	7455831	7456139	309	7456019	20	7.16045	6.12203	6.8184
chr7	7456886	7457172	287	7457020	20	6.47134	5.78192	9.45818
chr10	7463357	7464518	1162	7463983	65	16.5271	21.4271	25.0847
chr5	7467646	7467964	319	7467778	30	10.5702	5.44181	6.16838
chr9	7476081	7477540	1460	7476769	153	52.51	35.7118	61.6838
chr19	7481545	7482151	607	7481955	42	12.7907	7.33367	9.51983
chr3	7483221	7483489	269	7483386	16	5.79656	5.78192	4.91944
chr5	7494163	7494525	363	7494339	25	8.75957	6.12203	7.7656
chr7	7494224	7494527	304	7494371	25	8.86532	5.44181	9.86941
chr15	7494970	7495354	385	7495130	38	12.0182	7.76945	10.2806
chr11	7503884	7504459	576	7504087	28	8.93662	9.86327	14.3929
chr7	7508558	7509001	444	7508752	50	8.17503	15.3051	17.2715
chr7	7520067	7521585	1519	7520679	207	64.0971	42.0036	45.6229
chr15	7523046	7523398	353	7523297	27	5.10004	8.84293	10.0271
chr4	7524697	7525768	1072	7525385	93	32.0515	21.7672	20.15
chr13	7526191	7526767	577	7526526	50	17.3897	8.50282	11.1031
chr12	7531274	7531727	454	7531507	47	16.3667	9.18305	15.6266
chr18	7534167	7534509	343	7534321	30	7.47151	5.10374	5.52397
chrX	7537461	7537804	344	7537688	23	8.18337	6.46214	8.2245
chrY	7539557	7540230	674	7539725	63	16.0263	7.7376	19.7376
chr4	7539857	7540717	861	7540257	35	12.2751	7.48248	11.3864
chr11	7540433	7541283	851	7540938	49	10.5445	15.9853	12.7665
chr15	7544969	7545429	461	7545201	39	13.639	10.7816	14.8041
chr4	7545426	7545718	293	7545603	15	5.45558	5.44181	8.2245
chr4	7547348	7548168	821	7547955	68	23.5272	16.4245	23.8511
chr17	7549045	7549400	356	7549197	40	12.9542	12.5842	13.1592
chr11	7550382	7550994	613	7550622	54	18.7536	17.3457	18.5051
chr19	7554313	7555144	832	7554735	78	26.9369	12.2379	17.2715
chrX	7557707	7558045	339	7557866	33	11.5931	12.5842	11.9255
chr16	7563166	7563688	523	7563538	24	8.52435	4.28714	5.75715
chr9	7571294	7571581	288	7571415	18	6.4785	5.44181	10.6919
chr11	7573614	7574741	1128	7574308	166	56.9427	35.7118	45.2348
chr19	7580170	7581156	987	7580608	69	23.5834	10.9258	13.3109
chr16	7584968	7585454	487	7585123	24	8.52435	4.42147	6.21074
chr15	7587030	7587719	690	7587452	48	16.7077	14.2847	16.0378
chr14	7587617	7587937	321	7587771	30	6.53761	6.12203	7.56837
chr3	7593449	7593794	346	7593644	23	8.18337	4.19285	7.93595
chrX	7593216	7594046	831	7593647	58	20.1175	18.7062	12.748
chr11	7593846	7594460	615	7594262	41	14.3209	5.10169	10.2806
chr19	7597303	7597866	564	7597512	24	8.52435	8.69532	9.04696
chr5	7598793	7599091	299	7598927	20	7.16045	6.80226	9.66116
chr2	7600562	7601061	500	7600894	18	5.33912	7.8226	7.94678
chr2	7602072	7603078	1007	7602577	104	35.8023	26.5288	32.898
chr19	7602260	7602694	435	7602323	16	5.79656	5.44181	5.37268
chr9	7610091	7610576	486	7610340	20	6.47134	3.74124	4.91944
chr4	7612216	7612715	500	7612517	20	7.16045	5.44181	5.52066
chr15	7612435	7613019	585	7612591	28	9.88824	6.28927	12.748
chr9	7614444	7614787	344	7614623	29	10.2292	5.69029	6.5796
chr17	7615123	7615882	760	7615537	64	22.1633	13.7765	19.7388
chr9	7616166	7616867	702	7616422	40	8.64652	10.8836	11.5143
chr18	7621181	7621771	591	7621513	27	8.62846	8.16271	9.86941
chr17	7621239	7622050	812	7621695	60	20.7994	15.3051	12.1781
chr16	7623188	7623490	303	7623312	22	7.26698	3.89336	7.81328
chr19	7629969	7630414	446	7630188	25	8.01214	5.0509	11.1031
chr11	7634136	7634747	612	7634339	49	17.0487	12.2441	12.748
chr12	7639390	7639995	606	7639647	32	8.26357	5.98978	8.2245
chr8	7639558	7640004	447	7639796	26	9.2063	6.06988	11.5143
chr2	7639655	7640202	548	7639949	44	15.3438	11.5638	11.5143
chr16	7643113	7643690	578	7643276	41	14.3209	10.7816	12.3368
chr5	7647255	7647784	530	7647432	12	4.43266	7.8226	6.99083
chr11	7648517	7648854	338	7648638	31	10.9112	7.48248	12.3368
chr18	7649629	7650489	861	7650079	83	28.6418	20.0667	30.0194
chr10	7650569	7651928	1360	7651677	54	18.7536	16.108	15.1818
chr10	7650569	7651928	1360	7651677	54	18.7536	16.108	14.727
chr11	7653929	7654191	263	7654184	12	4.37978	5.44181	7.13987
chr16	7659105	7660104	1000	7659566	64	22.1633	16.3254	22.6174
chr11	7671032	7671309	278	7671133	23	7.13899	6.80226	11.9255
chr13	7671183	7671855	673	7671405	34	11.9341	6.79827	9.45818
chrX	7672128	7672708	581	7672274	28	9.88824	8.0862	7.81328
chrY	7676244	7676535	292	7676342	26	8.3203	4.85591	9.31612
chr15	7681397	7681924	528	7681694	37	12.957	12.9243	12.3368
chr14	7682409	7682729	321	7682575	31	10.1106	7.28386	6.2625
chr3	7684666	7685816	1151	7685225	86	29.6647	17.3457	33.7205
chr8	7685686	7685977	292	7685777	30	5.64648	4.69544	4.80345
chr14	7693320	7693724	405	7693492	35	12.2751	9.18305	6.79706
chr16	7694516	7694794	279	7694750	24	5.27227	7.48248	8.63573
chr19	7696257	7696703	447	7696516	40	13.9799	8.38569	10.6919
chr14	7703756	7704363	608	7704168	61	15.5255	17.3457	17.6827
chr16	7705029	7705747	719	7705246	31	10.9112	8.16271	9.04696
chr12	7710016	7710509	494	7710252	18	6.4785	7.14237	9.86941
chr18	7719395	7719693	299	7719586	35	7.01319	5.58429	6.72483
chr9	7725524	7725901	378	7725739	25	8.86532	4.76158	6.16838
chr9	7727629	7728646	1018	7728068	91	31.3696	17.2994	18.3597
chr11	7732930	7734148	1219	7733564	100	34.4384	19.7265	36.599
chr7	7735970	7736570	601	7736430	29	9.24478	5.82709	7.62056
chr10	7740160	7740551	392	7740392	23	8.18337	7.14237	5.66422
chr4	7752185	7752726	542	7752513	24	8.52435	5.10169	10.2806
chr19	7753982	7755376	1395	7754623	94	29.2751	24.148	28.7858
chr11	7755891	7756640	750	7756259	32	8.26357	9.58365	7.64669
chr15	7758090	7758436	347	7758294	26	9.2063	6.46214	3.84276
chr4	7761042	7762240	1199	7761781	93	32.0515	23.1277	21.8489
chr14	7762899	7764068	1170	7763320	85	26.5017	19.5681	18.2872
chr12	7762756	7763875	1120	7763319	46	16.0258	11.9796	17.2715
chr16	7766847	7768343	1497	7767638	158	28.961	40.1333	41.9069
chr10	7768614	7769212	599	7768791	44	9.49008	10.5435	14.0379
chr11	7770007	7770695	689	7770502	33	10.4774	10.2034	9.86941
chrX	7773286	7773604	319	7773362	24	8.52435	5.44181	7.40205
chr15	7779938	7781575	1638	7780761	141	39.9029	33.5428	43.5899
chr11	7780747	7781829	1083	7781456	79	26.9525	23.4678	27.9633
chr18	7781321	7781675	355	7781478	35	12.2751	9.18305	6.24449
chr14	7793088	7793828	741	7793511	21	6.7795	3.34622	9.22489
chr12	7793748	7794434	687	7794084	46	16.0258	9.88314	16.0378
chr8	7797451	7798250	800	7797846	66	22.8453	13.6045	21.7949
chr6	7801018	7801923	906	7801507	62	21.4814	11.5638	14.8041
chr6	7802650	7803073	424	7802899	27	9.54727	8.83143	6.16838
chr18	7805681	7806195	515	7805861	36	12.616	8.16271	11.1031
chr11	7816164	7816993	830	7816558	55	19.0945	9.52316	25.9072
chr18	7816830	7817134	305	7816943	27	6.74846	5.98978	6.5796
chr13	7816949	7817369	421	7817157	43	15.0029	10.2034	16.0378
chr6	7817520	7818151	632	7817746	56	16.9551	13.2644	13.9817
chr2	7818861	7819665	805	7819283	82	28.3008	19.0463	21.7376
chr15	7819735	7820051	317	7819853	29	10.2292	8.50282	4.37828
chr17	7820553	7820877	325	7820691	31	10.781	7.48248	9.31612
chr7	7821532	7821989	458	7821768	55	19.0945	12.5842	11.9255
chr17	7825719	7826033	315	7825899	19	5.00822	6.12203	5.66422
chr18	7830200	7831105	906	7830629	57	17.8732	13.6045	19.3276
chr19	7841232	7841548	317	7841447	23	8.18337	5.3908	8.63573
chr10	7841592	7842199	608	7841684	22	7.08766	7.14237	4.08293
chr17	7842707	7844302	1596	7843339	153	45.8085	28.4071	53.344
chr16	7846174	7846716	543	7846387	29	10.2292	5.47483	9.31612
chr11	7853759	7854611	853	7854117	95	32.7335	26.5288	32.4868
chr7	7860344	7860837	494	7860536	28	9.88824	4.76158	6.16838
chr6	7860419	7860715	297	7860528	20	7.16045	4.37032	5.75715
chr7	7864302	7864823	522	7864620	22	7.8424	6.12203	8.2245
chr14	7869637	7869961	325	7869814	14	5.11461	5.3908	7.21948
chr3	7878022	7878493	472	7878280	23	8.18337	7.48248	7.40205
chr3	7888302	7889395	1094	7888684	51	17.7306	13.477	13.9817
chr11	7894179	7894977	799	7894590	72	24.8911	12.8682	18.5051
chr10	7894723	7895036	314	7894792	20	6.47134	6.12203	10.2806
chr12	7897363	7898391	1029	7897917	94	32.3925	21.5632	19.8248
chr18	7897309	7898162	854	7897753	80	27.6189	20.4068	18.9164
chr8	7900997	7901342	346	7901180	28	9.88824	7.8226	4.80345
chr12	7902229	7902698	470	7902486	18	6.4785	5.44181	7.81328
chr10	7902653	7903302	650	7902810	58	7.62744	11.5076	10.8078
chr12	7904079	7904617	539	7904233	42	14.6619	5.10473	13.9817
chr17	7908411	7908885	475	7908636	30	9.55294	4.37032	6.5796
chr3	7910816	7911082	267	7910952	18	6.00316	7.8226	7.16357
chr17	7910923	7911708	786	7911182	52	9.65365	4.43346	4.9131
chr10	7911088	7911395	308	7911180	21	7.50143	5.44181	7.81328
chr15	7911043	7911537	495	7911164	11	3.69791	4.28191	4.24816
chr17	7912982	7913614	633	7913218	32	6.95939	7.18774	7.9299
chr13	7914224	7914570	347	7914398	34	11.9341	5.78192	8.63573
chr15	7917510	7917870	361	7917735	29	8.92374	5.73043	7.39668
chr6	7925803	7926071	269	7925915	19	4.21781	5.78192	6.90083
chr10	7927447	7927744	298	7927560	21	6.7795	6.12203	8.2245
chr15	7933265	7933673	409	7933449	31	9.8611	3.87884	9.04696
chr7	7935885	7936251	367	7936014	27	8.62846	6.80226	5.52066
chr15	7939969	7940447	479	7940231	36	6.73934	6.46214	9.22489
chr7	7944558	7944844	287	7944689	25	6.51069	6.46214	8.2245
chr14	7948092	7949062	971	7948690	63	13.497	8.05238	16.9927
chr13	7949373	7949799	427	7949494	25	6.92326	8.16271	6.81153
chr3	7956009	7956550	542	7956342	23	8.18337	6.80226	7.81328
chr16	7960506	7960811	306	7960598	29	10.2292	5.69029	11.9255
chr12	7961877	7962264	388	7962033	39	13.639	9.52316	10.2806
chr13	7963941	7964385	445	7964125	29	10.2292	8.16271	11.9255
chr14	7966238	7967150	913	7966787	26	8.3203	5.09131	7.21948
chr9	7968929	7970156	1228	7969712	86	29.6647	8.98258	30.0812
chr12	7970315	7971395	1081	7970906	111	38.1891	23.8079	33.6792
chr11	7975860	7976680	821	7976271	58	20.1175	18.3661	21.3837
chr1	7982718	7983557	840	7983084	54	18.7536	12.2441	15.6266
chr11	7988647	7989491	845	7989071	62	21.4814	19.3864	19.7388
chr15	7989778	7990407	630	7990187	49	10.5445	13.9446	11.8949
chr10	7993483	7994036	554	7993667	32	8.26357	5.78192	9.86941
chr14	7996749	7997077	329	7996942	27	9.54727	7.14237	8.63573
chr1	8000070	8000631	562	8000487	26	9.2063	5.44181	8.02165
chr10	8000494	8001031	538	8000782	46	16.0258	13.9446	13.9817
chr10	8001713	8002204	492	8001949	33	11.5931	10.8836	9.86941
chr5	8006126	8006583	458	8006340	31	10.9112	5.44181	10.6919
chr3	8010749	8011258	510	8011079	39	13.639	10.7816	9.83887
chr18	8018027	8018481	455	8018357	21	6.7795	7.48248	9.46046
chr10	8022573	8023328	756	8022949	43	15.0029	13.2644	16.0378
chr9	8023373	8023715	343	8023560	33	10.1136	8.50282	7.93595
chr10	8027864	8028324	461	8028068	36	11.4019	9.18305	9.86941
chr15	8028180	8029095	916	8028545	38	13.298	10.1826	15.1367
chr16	8033930	8034242	313	8034034	21	7.50143	7.40712	9.17984
chr2	8038093	8038363	271	8038220	20	5.25863	4.76158	5.17562
chr16	8040480	8040988	509	8040676	22	4.18932	3.88473	6.00431
chr1	8043797	8044079	283	8043874	21	7.50143	7.48248	6.5796
chr16	8046622	8047249	628	8047018	32	11.2521	9.18305	17.2715
chr12	8048136	8048667	532	8048452	39	13.639	6.12203	9.04696
chr14	8048210	8048714	505	8048470	33	8.51398	9.18305	11.9255
chr17	8048932	8050859	1928	8049838	231	58.0954	67.0022	65.7775
chr15	8056591	8056872	282	8056751	20	5.25863	5.09131	6.01624
chr12	8056721	8057251	531	8056913	33	11.5931	12.2441	9.17984
chr6	8057824	8058389	566	8058048	21	6.95102	5.3908	6.5796
chr7	8057693	8058010	318	8057806	32	11.2521	7.48248	8.63573
chr8	8060278	8060589	312	8060489	18	6.4785	4.76158	8.2245
chr14	8064532	8065157	626	8064744	80	17.0821	19.0009	16.2169
chrX	8072481	8072791	311	8072644	19	6.81948	4.76158	8.2245
chr9	8075237	8075733	497	8075483	38	13.298	10.2034	7.24587
chr16	8079984	8080777	794	8080420	55	17.2569	18.7062	17.2715
chr11	8085992	8086958	967	8086426	55	19.0945	10.5435	15.6266
chr10	8086242	8087370	1129	8086793	96	33.0745	25.1684	32.4868
chr14	8095776	8096304	529	8095995	29	10.2292	5.69029	12.1094
chr9	8104518	8105291	774	8104884	37	11.7101	9.95461	6.79988
chr17	8108616	8109594	979	8109255	60	16.243	18.026	22.2062
chr14	8115659	8116502	844	8116082	65	19.9832	13.3537	16.6504
chr12	8121248	8121540	293	8121400	18	6.4785	4.42147	8.63573
chr11	8137401	8138027	627	8137820	67	20.9548	12.5842	24.6735
chr12	8143301	8144329	1029	8143866	123	31.051	32.3107	27.9633
chrX	8144885	8145416	532	8145241	39	13.639	13.6045	13.9817
chr5	8144914	8145194	281	8145026	18	6.4785	5.44181	8.63573
chr15	8151211	8151777	567	8151382	28	9.88824	5.44181	12.3368
chr3	8152216	8152536	321	8152297	13	4.77363	5.44181	5.52066
chr8	8152479	8153429	951	8152885	67	23.1862	16.6655	20.15
chr14	8153438	8154325	888	8153806	88	30.3467	19.0463	20.7083
chr14	8156847	8157885	1039	8157317	56	11.547	11.4114	18.9209
chr9	8171974	8172337	364	8172214	23	8.18337	6.12203	5.34593
chr7	8177155	8177446	292	8177328	26	9.2063	7.48248	11.1031
chr2	8178582	8179113	532	8178815	59	20.4584	11.7625	15.6266
chr4	8187059	8187470	412	8187234	32	11.2521	7.8226	8.2245
chr4	8187978	8188710	733	8188395	84	28.9828	17.6699	27.1409
chr2	8188814	8189177	364	8188961	39	12.6382	9.12853	7.71411
chr17	8193492	8193996	505	8193678	50	17.3897	8.81484	13.1592
chr1	8194556	8194968	413	8194794	60	15.2751	8.77843	9.06275
chr12	8204571	8204912	342	8204780	30	7.47151	9.07507	10.2806
chr19	8208268	8208721	454	8208522	40	13.9799	8.84293	10.6963
chr3	8208979	8209546	568	8209320	54	18.7536	13.6045	14.8368
chr7	8215683	8215991	309	8215762	15	5.45558	5.98978	4.81458
chr15	8218661	8219170	510	8218980	30	7.47151	8.0862	11.1031
chr17	8222579	8222982	404	8222822	36	12.4655	4.61311	8.28099
chr17	8226308	8227323	1016	8226911	90	22.7874	19.7663	26.7296
chr15	8228909	8229327	419	8228991	18	4.75781	4.76158	3.96495
chr5	8229190	8229478	289	8229315	21	7.50143	4.76158	3.39853
chr17	8230519	8231865	1347	8231279	126	39.1362	35.3717	40.9104
chr14	8233511	8234293	783	8233940	49	12.5206	13.9446	14.8041
chr8	8240667	8241131	465	8240888	34	11.9341	10.8836	8.64229
chr19	8247827	8248163	337	8248028	23	8.18337	5.44181	10.2806
chr8	8252637	8254368	1732	8253625	113	38.871	24.8282	36.1878
chr13	8254378	8255216	839	8254825	31	10.9112	8.84293	5.34593
chr13	8254378	8255216	839	8254825	31	10.9112	8.84293	5.66422
chrX	8255240	8256449	1210	8255608	80	27.6189	22.1073	22.2062
chr11	8261524	8262411	888	8262028	25	8.86532	5.78192	13.9817
chr11	8265422	8265791	370	8265593	32	10.1693	6.12203	7.21948
chr1	8270878	8271629	752	8271174	45	14.1753	9.86327	12.4613
chr7	8274291	8274611	321	8274458	55	19.0945	12.9243	18.0939
chrX	8275392	8275757	366	8275611	37	12.957	6.46214	11.1031
chr15	8275442	8275806	365	8275663	31	10.5707	11.1958	10.5957
chr1	8289058	8289747	690	8289304	42	10.7677	12.9243	11.1031
chr10	8291878	8292813	936	8292293	86	29.6647	20.521	23.8511
chr18	8298087	8298486	400	8298271	30	10.5702	5.78192	7.40205
chr1	8301863	8302599	737	8302243	56	19.4355	12.9243	15.6266
chr10	8304745	8305022	278	8304832	15	4.93055	4.76158	4.52348
chr10	8305649	8306572	924	8306145	137	46.4931	40.1333	36.599
chr15	8309193	8310058	866	8309548	40	12.6345	10.5435	13.4566
chr11	8312779	8313092	314	8312927	15	5.45558	2.78736	7.40205
chr1	8314274	8315151	878	8314682	71	24.5501	16.7714	23.0286
chr11	8315774	8316311	538	8315936	35	12.2751	7.14237	13.5704
chr3	8318555	8318867	313	8318676	19	6.16319	8.50282	7.40205
chr14	8319034	8320196	1163	8319691	89	30.6877	23.8079	25.496
chr8	8319707	8320414	708	8319863	25	6.51069	4.49233	8.63573
chr10	8327933	8329112	1180	8328678	82	28.3008	19.7265	26.7296
chr14	8338636	8339379	744	8339022	39	8.43563	12.9243	15.2153
chr6	8342045	8342722	678	8342249	30	10.5702	6.80226	13.1592
chr2	8344815	8345629	815	8345218	55	19.0945	12.5842	13.9817
chr11	8345748	8346280	533	8346121	19	6.16319	4.32934	8.63573
chr12	8347813	8348121	309	8347974	27	9.54727	4.42147	9.45818
chr7	8348127	8348445	319	8348314	31	10.9112	5.10169	7.81328
chr10	8354225	8354575	351	8354409	35	12.2751	4.61311	11.5143
chr4	8356250	8357071	822	8356626	85	29.3238	21.087	26.7296
chr3	8358557	8358854	298	8358699	16	5.79656	5.44181	6.16838
chr16	8358618	8359183	566	8359009	23	8.18337	3.64193	6.21074
chr4	8358871	8359232	362	8359093	25	8.86532	5.98978	5.75715
chr7	8368596	8369211	616	8369021	31	7.71253	6.1641	5.65206
chr13	8371108	8371485	378	8371306	38	12.0182	7.18774	13.5704
chr2	8371271	8371546	276	8371327	20	7.16045	5.10169	6.16838
chr3	8371247	8372016	770	8371592	47	12.0197	10.5435	11.1031
chr7	8372732	8373049	318	8372893	30	6.53761	6.28927	5.34593
chr17	8373302	8373735	434	8373517	43	13.559	11.2237	7.71411
chr14	8374902	8375584	683	8375259	34	7.38118	6.31268	8.40604
chr6	8375033	8375547	515	8375473	17	4.5074	3.88473	5.34593
chr17	8375098	8376003	906	8375625	36	9.26521	11.2237	11.5143
chr14	8375852	8376458	607	8376286	22	7.8424	4.19285	3.84276
chr16	8380464	8381522	1059	8380895	94	23.789	24.7439	23.7897
chr5	8382429	8382713	285	8382542	23	8.18337	6.46214	9.45818
chr18	8384291	8385271	981	8384781	101	34.7793	22.4474	28.3745
chr8	8386594	8387235	642	8387035	50	17.1822	11.2237	13.1592
chr7	8386896	8387423	528	8387302	26	9.2063	5.09131	10.3512
chr8	8389930	8390651	722	8390351	32	11.2521	5.78192	11.1031
chrY	8392849	8393250	402	8393067	42	14.6619	6.58876	13.9817
chr12	8394070	8394729	660	8394204	18	4.00692	6.12203	6.5796
chr12	8395191	8395591	401	8395441	35	9.0148	6.80226	6.43311
chr3	8398876	8399159	284	8399051	19	6.81948	6.28927	9.45818
chr4	8399067	8400379	1313	8399652	99	34.0974	14.7938	27.6033
chr16	8400035	8400940	906	8400522	35	11.0937	6.03203	8.16841
chr10	8401701	8402186	486	8401936	32	9.81611	7.94069	11.9075
chr13	8410696	8411018	323	8410852	19	6.16319	5.78192	7.40205
chr10	8413406	8414735	1330	8414329	83	28.6418	22.7876	22.6174
chr16	8419697	8420517	821	8420116	55	18.3793	15.7804	13.9817
chr17	8421172	8421835	664	8421426	26	8.5308	6.12203	8.08916
chr16	8424972	8426442	1471	8425880	95	32.343	16.7403	32.898
chr14	8431024	8432059	1036	8431853	31	4.58002	7.48248	5.09991
chr14	8431024	8432059	1036	8431853	31	4.58002	7.48248	8.2245
chr15	8431917	8432288	372	8432147	23	5.06138	6.12203	7.40205
chr19	8432512	8433279	768	8432996	22	7.8424	7.48248	8.63573
chr11	8436817	8437505	689	8437275	41	14.3209	12.4782	16.8602
chr8	8439382	8441166	1785	8440568	97	33.0168	24.8282	20.7396
chr6	8442952	8443988	1037	8443503	104	35.8023	27.5491	22.6497
chr16	8449913	8451026	1114	8450426	89	29.3485	23.6596	29.197
chr2	8450584	8451188	605	8450774	36	9.26521	8.68518	13.9817
chr19	8454007	8454813	807	8454421	56	19.4355	12.5842	16.0378
chr13	8454153	8454874	722	8454598	33	10.4774	8.50282	10.6919
chr18	8459166	8459481	316	8459339	28	9.88824	5.44181	5.75715
chr3	8459656	8460782	1127	8460199	133	41.2933	22.8228	36.5744
chr6	8463669	8464576	908	8464130	54	18.7536	12.9243	16.8602
chr10	8466699	8467324	626	8467133	64	13.7079	16.1724	18.9164
chr13	8469853	8470164	312	8469996	22	7.8424	6.46214	6.5796
chr14	8472836	8473149	314	8473000	23	8.18337	4.89959	9.45818
chrX	8475248	8475835	588	8475602	34	11.9341	8.84293	8.2245
chr12	8478923	8479259	337	8479102	29	7.2305	5.82709	5.34593
chr2	8483651	8483983	333	8483840	17	6.13753	5.44181	6.90083
chr11	8484697	8485073	377	8484837	25	8.75957	5.47483	8.2245
chr5	8488308	8488700	393	8488469	22	7.8424	3.67469	6.16838
chr12	8492390	8493554	1165	8493002	119	36.9791	30.27	35.6963
chr12	8497143	8497419	277	8497268	24	7.89889	5.69029	6.99083
chr10	8506806	8508464	1659	8507488	159	54.5558	29.8638	56.3379
chr3	8511328	8511894	567	8511545	30	9.55294	6.12203	4.81458
chr12	8523824	8524784	961	8524375	68	21.263	18.026	23.0286
chr2	8528923	8529190	268	8529145	18	4.57931	3.64193	4.48554
chr8	8531377	8532701	1325	8531904	83	25.8854	18.6953	26.7296
chr2	8535043	8535357	315	8535296	23	5.06138	4.82113	7.36348
chr4	8540413	8541001	589	8540803	36	11.4019	7.14237	12.3368
chr5	8542776	8543801	1026	8543207	67	23.1862	12.8682	27.5521
chr6	8547843	8548314	472	8548102	22	7.8424	5.78192	8.63573
chr15	8548395	8548727	333	8548578	39	11.2403	8.65868	12.2398
chr5	8550078	8550346	269	8550197	16	5.23871	5.3908	6.16838
chr5	8550686	8551467	782	8551024	43	13.902	10.8836	11.7314
chr16	8552758	8553521	764	8553109	59	20.4584	10.8836	18.5051
chr14	8553092	8553833	742	8553518	31	10.9112	7.8226	9.83887
chr6	8553714	8554541	828	8553942	60	15.2751	15.3051	15.2153
chr19	8555044	8555491	448	8555258	34	11.9341	10.5435	7.93595
chr1	8555603	8556441	839	8555976	79	27.2779	17.6859	21.7949
chr3	8557606	8558254	649	8558025	39	13.639	9.18305	13.1592
chr17	8558399	8558960	562	8558771	35	12.2751	7.3735	13.5704
chr4	8562687	8563224	538	8563021	15	5.45558	4.42147	4.9347
chr2	8563670	8564622	953	8564134	55	19.0945	12.2441	17.2715
chr4	8564053	8564691	639	8564432	35	12.2751	9.52316	14.3929
chr11	8566345	8567356	1012	8566875	77	23.2017	18.7062	15.9329
chr3	8567341	8567663	323	8567515	39	12.3264	8.16271	13.9817
chr16	8567430	8568374	945	8567979	85	21.5354	23.1277	25.496
chr12	8570370	8571190	821	8570701	56	19.4355	13.2644	14.8041
chr18	8574711	8575571	861	8575117	63	21.8223	12.5842	20.5613
chr19	8578860	8579130	271	8578954	21	4.6396	4.54952	7.56837
chr8	8583750	8584284	535	8584108	27	7.01151	8.84293	7.20518
chr14	8590435	8591003	569	8590597	27	8.32882	10.2034	13.9817
chr7	8602013	8602380	368	8602235	21	7.50143	6.12203	8.08916
chr12	8606036	8606407	372	8606209	18	5.85503	4.76158	6.99083
chr14	8606917	8607288	372	8607061	21	4.6396	5.0987	5.61515
chr6	8608828	8609324	497	8608930	29	10.2292	4.61311	6.80539
chr7	8612257	8612791	535	8612418	50	17.3897	10.5435	14.3929
chr11	8614121	8614629	509	8614483	28	9.88824	7.40712	5.75715
chr5	8617363	8618114	752	8617749	44	15.3438	13.9446	9.84708
chr8	8622169	8622630	462	8622406	45	15.6848	8.84293	10.2806
chr16	8622010	8623063	1054	8622428	60	15.2751	15.9849	9.89111
chr1	8622203	8622473	271	8622304	17	6.13753	5.44181	5.75715
chr17	8622571	8622924	354	8622750	31	10.9112	10.5435	6.5796
chr19	8622777	8623781	1005	8623354	111	38.1891	21.087	26.5544
chr12	8623048	8623587	540	8623406	40	8.64652	6.93684	11.4171
chr6	8624166	8624960	795	8624499	61	19.1059	10.1974	20.15
chr11	8624839	8625471	633	8625101	38	13.1394	10.5561	7.64669
chr19	8625834	8626993	1160	8626478	102	18.7609	11.8827	23.0142
chr6	8627805	8628613	809	8627994	17	6.13753	5.44181	5.29786
chr11	8627931	8629581	1651	8628753	188	47.3277	51.357	44.1992
chr9	8628631	8629320	690	8628968	52	13.2718	10.5307	12.0924
chr3	8628869	8629609	741	8629199	36	12.616	5.44181	13.5704
chr17	8640904	8641249	346	8641064	26	9.2063	6.58876	7.62056
chr1	8647477	8648057	581	8647625	37	12.957	6.80226	10.6919
chr6	8650906	8651501	596	8651076	18	6.4785	4.37032	4.11225
chr7	8654955	8655492	538	8655400	26	9.2063	6.46214	9.45818
chr16	8658630	8659060	431	8658823	18	5.6517	5.42069	5.50063
chr5	8659960	8660579	620	8660119	52	14.1128	16.6655	19.3276
chr18	8661359	8661654	296	8661508	24	8.52435	6.12203	7.59091
chr13	8661356	8662264	909	8661859	64	22.1633	12.279	18.5051
chr19	8662903	8663762	860	8663429	68	11.0603	16.2285	15.8719
chr16	8664885	8666022	1138	8665494	59	15.0247	11.4114	15.6379
chr15	8664946	8665755	810	8665360	40	13.9799	10.2034	10.6963
chr2	8668057	8668494	438	8668249	46	16.0258	10.5435	11.5143
chr13	8675569	8676129	561	8675779	25	8.86532	5.78192	11.9255
chr5	8685287	8685773	487	8685521	36	5.9309	8.05122	11.1031
chr11	8688847	8689823	977	8689383	110	37.8481	25.1684	35.941
chr6	8689021	8689723	703	8689353	51	17.7306	15.3051	13.9817
chr17	8690431	8690722	292	8690596	19	6.81948	4.19285	4.52348
chr11	8691445	8692706	1262	8692237	117	40.2349	29.5898	32.8742
chr10	8693006	8693362	357	8693177	37	6.92149	10.4821	10.2806
chr14	8694172	8694502	331	8694343	22	7.08766	5.78192	7.40205
chr2	8697631	8698187	557	8698016	21	7.50143	4.08135	7.81328
chr1	8698113	8698804	692	8698618	20	7.16045	5.78192	4.9347
chr19	8699225	8699768	544	8699539	22	7.8424	6.46214	5.94743
chr6	8702733	8703108	376	8702971	21	6.7795	5.44181	8.63573
chr17	8702938	8703742	805	8703329	101	24.5837	15.3112	23.6398
chr13	8706269	8707147	879	8706667	39	13.639	12.5842	16.8602
chr8	8707847	8709173	1327	8708494	140	48.0773	32.9909	34.5429
chr15	8708842	8709588	747	8709141	56	17.5651	11.5638	15.2153
chr14	8709547	8710130	584	8709935	52	11.1772	13.6045	10.3274
chr14	8712115	8712399	285	8712282	18	6.4785	6.46214	8.2245
chr18	8712741	8713072	332	8712936	26	9.2063	10.8836	10.0062
chr16	8713203	8713726	524	8713574	37	11.3034	6.49401	8.42273
chr10	8714298	8715114	817	8714898	28	8.93662	9.18305	8.42273
chr5	8719484	8719810	327	8719699	29	6.32672	7.14237	6.99083
chr15	8723617	8723880	264	8723662	14	5.11461	5.10169	6.5796
chr7	8726494	8726830	337	8726617	30	6.53761	6.79827	8.63573
chr3	8730020	8730960	941	8730527	65	22.5043	11.6365	8.64621
chr16	8733987	8734394	408	8734208	18	4.75781	5.5703	6.08903
chr11	8735081	8736706	1626	8736197	120	41.2578	30.6102	30.8419
chr15	8737741	8738055	315	8737919	32	11.2521	7.48722	9.91238
chr14	8739485	8739803	319	8739617	27	8.62846	9.58365	6.21074
chr17	8740039	8740749	711	8740330	45	15.6848	7.14237	10.9741
chr4	8741553	8742492	940	8742024	55	17.6935	16.3254	17.6827
chr12	8755113	8755945	833	8755527	47	15.1659	11.9796	10.1956
chr10	8756471	8756850	380	8756637	34	10.7856	5.10374	7.18995
chr13	8757459	8758506	1048	8757954	104	35.8023	21.4271	35.3654
chr3	8757746	8758405	660	8757984	64	19.3348	15.3051	17.2715
chr10	8758990	8759657	668	8759453	42	13.2508	4.93128	7.18995
chr12	8763178	8763539	362	8763390	31	10.9112	5.15278	5.52397
chr10	8763088	8763541	454	8763319	18	4.75781	4.42147	4.52348
chr16	8763769	8765577	1809	8764591	148	46.4991	32.9438	28.7974
chr12	8767317	8768095	779	8767748	51	16.0243	12.5842	14.8041
chr15	8768466	8769180	715	8768932	39	13.639	5.44181	14.8368
chr18	8771735	8772004	270	8771848	17	4.79303	6.80226	6.51385
chr4	8773393	8774134	742	8773722	68	14.5515	12.9207	15.6422
chr6	8774386	8775566	1181	8774928	102	31.7404	18.938	36.599
chr18	8775781	8776290	510	8776113	24	3.57814	7.48722	8.70362
chr8	8777906	8779057	1152	8778554	87	30.0057	22.4474	27.9633
chr2	8778739	8779133	395	8778945	23	6.00987	4.08135	4.52348
chr19	8778889	8779769	881	8779424	51	15.1139	14.1701	10.0872
chr10	8779291	8780422	1132	8779833	109	37.5071	22.1622	27.6033
chr8	8783634	8783919	286	8783756	20	6.63507	3.88473	5.67627
chr5	8783978	8784513	536	8784270	40	10.2668	8.44485	11.5143
chr15	8785092	8786770	1679	8785870	194	60.0911	48.9763	38.5167
chr10	8786390	8787000	611	8786774	52	16.3324	14.2847	12.7445
chr16	8788170	8788754	585	8788501	47	10.1228	7.55354	6.00431
chr11	8790400	8792055	1656	8791433	132	45.3495	29.9299	39.4776
chr6	8791970	8792618	649	8792203	29	9.24478	5.78192	6.16838
chr8	8796499	8797728	1230	8797076	121	37.5954	30.2484	37.4215
chr3	8799598	8800776	1179	8800135	77	26.596	18.8678	27.9633
chr14	8799627	8800268	642	8799828	47	8.74293	9.52316	14.8041
chr2	8810234	8810620	387	8810384	26	7.58717	6.69048	6.14776
chr2	8811927	8812296	370	8812102	27	9.54727	9.18305	8.63573
chr5	8812577	8813218	642	8812844	45	15.6848	7.78671	12.748
chr5	8818035	8818939	905	8818537	72	22.4956	21.7672	19.3223
chr4	8822945	8823294	350	8823061	28	8.93662	9.18305	11.5143
chr17	8824018	8824748	731	8824430	61	11.2929	11.1686	20.0541
chr9	8826145	8826657	513	8826534	20	7.16045	8.50282	11.5143
chr13	8826352	8826751	400	8826518	37	6.92149	11.8333	9.83887
chr7	8827269	8828059	791	8827627	36	11.4019	8.69532	11.3864
chr13	8831204	8831630	427	8831435	37	12.957	7.18774	12.748
chr10	8832927	8834828	1902	8833704	194	65.6968	47.9559	49.6859
chr13	8834336	8834644	309	8834533	21	7.50143	6.23911	7.21948
chr17	8842540	8843817	1278	8843052	126	39.1362	34.1372	26.3386
chr1	8848583	8849091	509	8848877	28	9.88824	6.46214	11.1031
chr16	8848725	8849695	971	8849228	90	31.0286	16.8897	30.8419
chr1	8851723	8852661	939	8852305	78	26.9369	21.087	24.2623
chr8	8851891	8852777	887	8852350	49	17.0487	13.6045	13.5704
chr18	8852004	8852506	503	8852266	29	9.24478	5.67192	9.46046
chr14	8852871	8853790	920	8853376	45	15.6848	9.86327	23.0286
chr4	8853473	8853860	388	8853690	31	10.9112	8.84293	11.3864
chr3	8856216	8856565	350	8856427	33	11.5931	7.8226	8.2245
chrY	8856663	8857007	345	8856824	94	8.85479	7.05021	7.16073
chr16	8860372	8861151	780	8860669	38	13.298	7.8226	8.59628
chr13	8872561	8872899	339	8872744	28	6.98948	9.86327	8.63573
chr18	8872645	8873359	715	8873015	46	16.0258	14.965	12.1094
chr16	8876063	8876692	630	8876302	30	9.55294	7.78671	9.31612
chr8	8875850	8876626	777	8876165	32	8.26357	8.16271	9.66116
chr17	8877403	8878335	933	8877711	28	9.10609	8.37327	6.90083
chr10	8880591	8881970	1380	8881367	227	54.9518	64.2813	68.4937
chr3	8880975	8881295	321	8881142	25	8.75957	6.12203	4.53137
chr7	8887296	8887653	358	8887478	38	12.0182	8.84293	9.04696
chrY	8887990	8888470	481	8888093	25	8.01214	4.42147	7.60308
chr19	8890962	8892695	1734	8891650	146	43.7263	33.2369	29.1707
chr13	8903079	8903634	556	8903506	33	10.7425	10.8836	11.5143
chr17	8907545	8908222	678	8907982	34	11.9341	7.0899	12.0764
chr5	8910762	8911577	816	8911124	48	15.0998	12.2441	14.3929
chr11	8912267	8912979	713	8912585	51	13.0214	14.3755	15.6266
chr19	8915377	8915699	323	8915593	24	7.70398	7.78671	5.52066
chr3	8915672	8916200	529	8915924	41	12.9427	7.0899	8.70362
chr15	8919570	8919928	359	8919714	42	14.6619	6.12203	9.45818
chr4	8921251	8921604	354	8921422	22	4.18932	3.39914	6.16838
chr19	8923436	8924415	980	8923979	77	24.6445	15.8805	16.8121
chr6	8928065	8928332	268	8928180	15	5.45558	6.46214	4.83058
chr18	8933335	8934089	755	8933481	32	11.2521	10.2034	11.9255
chr18	8933335	8934089	755	8933481	32	11.2521	3.74124	11.9255
chr18	8933335	8934089	755	8933481	32	11.2521	10.2034	5.34593
chr18	8933335	8934089	755	8933481	32	11.2521	3.74124	5.34593
chr18	8938940	8940056	1117	8939550	65	22.5043	17.6859	21.3837
chr18	8940419	8941015	597	8940860	22	6.84153	7.8226	5.52066
chr17	8943194	8944004	811	8943724	58	18.6414	16.6655	12.1781
chr1	8943728	8944112	385	8943901	25	8.86532	5.78192	6.5796
chr7	8946995	8947279	285	8947127	23	7.39582	5.44181	7.81328
chr3	8947094	8948027	934	8947473	67	23.1862	13.8393	12.1781
chr16	8950588	8951437	850	8951018	35	12.2751	12.2441	12.7665
chr4	8952618	8953784	1167	8953207	82	27.9632	14.3755	20.3574
chr17	8953220	8953595	376	8953363	22	6.46315	7.48722	4.16979
chr10	8957611	8958333	723	8958021	46	15.8346	11.2237	10.0062
chr4	8958291	8958553	263	8958399	14	5.11461	5.44181	6.51385
chr17	8961333	8961656	324	8961547	26	8.5308	5.10169	6.30405
chr19	8964375	8964684	310	8964509	21	6.54408	4.05069	7.72843
chr19	8973857	8974904	1048	8974469	86	21.7858	21.5773	24.0968
chr18	8976421	8978061	1641	8977048	128	39.7525	35.3717	44.8235
chr3	8976982	8977246	265	8977022	14	5.11461	5.09131	7.40205
chr1	8977000	8977574	575	8977415	44	15.3438	11.904	11.5143
chr3	8978392	8978654	263	8978530	17	3.2786	5.44181	6.16838
chr4	8990055	8990561	507	8990315	28	9.88824	8.50282	6.51385
chr3	8997599	8998224	626	8997828	59	20.4584	15.3051	7.9257
chrY	9002729	9003040	312	9002818	58	11.0694	13.2644	23.1196
chr3	9002929	9003503	575	9003092	27	9.43338	6.28927	9.45818
chr8	9003164	9004671	1508	9003911	153	52.51	37.097	42.7674
chr4	9004418	9004965	548	9004586	48	16.7077	17.0056	16.0378
chrY	9010069	9010363	295	9010135	35	12.2751	9.86327	17.2715
chr9	9017541	9018866	1326	9018245	67	23.1862	20.7469	22.6174
chr7	9018055	9018381	327	9018227	25	8.86532	4.42147	9.04696
chr10	9018641	9019544	904	9019024	29	10.2292	7.14237	8.2245
chr8	9031777	9032607	831	9032154	35	12.2751	6.58876	10.2806
chr1	9032334	9033179	846	9032746	28	9.88824	7.14237	11.1031
chr12	9033605	9034947	1343	9034440	96	29.8914	20.4189	20.3912
chr2	9035080	9035908	829	9035386	37	12.957	9.18305	14.8041
chr1	9035416	9036121	706	9035827	80	27.6189	19.0463	32.898
chr16	9036853	9037696	844	9037166	43	13.559	7.8226	6.25468
chr19	9042164	9043049	886	9042599	63	21.8223	17.0056	20.9725
chr7	9043790	9044701	912	9044510	47	16.3667	13.9446	17.6827
chr13	9044731	9045264	534	9044801	25	5.48316	8.50282	5.66422
chr19	9046576	9048169	1594	9047077	120	32.2198	31.6305	32.4868
chr4	9047040	9048892	1853	9048081	151	51.828	30.1066	46.4684
chr19	9046576	9048169	1594	9047077	120	32.2198	31.6305	6.5796
chr8	9048672	9049006	335	9048868	26	8.03137	7.04107	8.2245
chr5	9050159	9050426	268	9050361	23	6.00987	4.85591	8.41273
chr14	9055353	9056199	847	9055866	27	9.54727	6.12203	9.45818
chr10	9055836	9056375	540	9055974	37	12.957	7.78671	15.2153
chr5	9057497	9057762	266	9057685	15	5.45558	6.12203	7.21948
chr15	9059082	9059671	590	9059251	32	10.1693	6.46214	9.86941
chr6	9070530	9071219	690	9070762	48	15.0998	10.7816	13.1592
chr17	9072410	9073198	789	9072792	30	10.5702	13.2644	8.28099
chr14	9075069	9075346	278	9075186	25	4.73575	5.0987	6.5796
chr2	9075301	9075876	576	9075487	43	15.0029	12.2441	19.7388
chr7	9076136	9076741	606	9076344	25	6.51069	6.12203	5.52066
chr15	9081461	9082045	585	9081715	37	12.957	6.28927	5.34593
chr3	9082386	9082722	337	9082557	24	5.27227	7.14237	11.5143
chr4	9082912	9083662	751	9083174	32	11.2521	9.86327	8.28099
chr19	9089466	9090268	803	9089950	46	14.4835	18.3661	16.449
chr3	9091742	9092259	518	9092044	10	3.75071	4.08135	6.5796
chr17	9094261	9094546	286	9094374	20	7.16045	5.0987	9.04696
chr3	9096152	9096556	405	9096392	27	7.86818	4.85591	9.39368
chr18	9104059	9104380	322	9104302	29	10.2292	8.50282	10.2806
chr5	9105562	9106427	866	9105997	72	24.8911	16.5881	11.0499
chr16	9105873	9106185	313	9105975	13	4.71669	3.64193	5.34593
chr1	9106584	9107363	780	9106973	43	15.0029	7.04107	17.2715
chr12	9106694	9107017	324	9106876	20	7.16045	5.73043	7.81328
chr5	9107917	9108902	986	9108471	48	15.0998	12.5842	19.3276
chr15	9114981	9115758	778	9115412	84	26.1935	18.3661	19.3223
chr17	9117479	9118458	980	9118009	81	17.293	21.7672	23.4398
chr5	9122345	9122654	310	9122570	15	5.45558	6.12203	5.34593
chr17	9123048	9124062	1015	9123447	95	32.7335	18.7173	24.6393
chr12	9128868	9129497	630	9129290	48	15.0998	8.74063	16.449
chr5	9141292	9141984	693	9141632	44	15.3438	12.279	11.9255
chr11	9142920	9143186	267	9143081	10	3.75071	4.76158	4.9347
chr16	9142861	9143420	560	9142968	26	9.2063	7.04107	7.62056
chr11	9151769	9152070	302	9151884	24	6.26028	4.49233	6.5796
chr12	9151800	9153029	1230	9152439	107	36.8252	28.5695	31.7438
chr19	9159135	9159411	277	9159286	22	4.48065	5.44181	5.75715
chr12	9159155	9159798	644	9159388	46	16.0258	12.9243	16.449
chr10	9174427	9175725	1299	9174950	103	35.4613	24.148	28.3745
chr17	9178950	9179337	388	9179135	38	13.298	4.93128	8.97107
chr12	9179691	9180569	879	9180074	55	19.0945	14.2847	14.8368
chr15	9180113	9181127	1015	9180643	112	38.5301	26.5288	22.4277
chr12	9189802	9190212	411	9189974	25	5.48316	6.46214	5.94743
chr6	9193050	9193857	808	9193578	69	23.8682	15.3051	20.9725
chr8	9194351	9194673	323	9194469	23	7.39582	8.16271	7.08027
chr18	9202948	9203215	268	9203101	19	5.00822	4.85591	6.55579
chr8	9211102	9211694	593	9211414	39	13.639	10.2034	12.3368
chr12	9211423	9211845	423	9211643	44	15.3438	6.9581	9.51983
chr1	9213020	9213910	891	9213652	131	45.0086	32.6508	47.7021
chr15	9219535	9220086	552	9219724	66	7.8976	6.38692	7.36765
chr18	9221954	9222270	317	9222108	23	8.18337	3.89336	4.11225
chr8	9222883	9223467	585	9223298	30	10.5702	8.84293	7.81328
chr12	9228679	9228944	266	9228828	17	6.13753	5.10169	6.5796
chr8	9230157	9230924	768	9230551	45	15.6848	11.0811	9.36673
chr4	9234287	9234681	395	9234616	29	10.2292	8.84293	10.2806
chr2	9235104	9235526	423	9235303	39	12.6382	8.50282	5.38101
chr2	9238716	9239606	891	9239160	88	27.4262	19.3864	30.0194
chr11	9242395	9243139	745	9242829	62	21.4814	18.3661	16.8602
chr5	9248557	9249406	850	9248935	49	17.0487	7.78671	13.4566
chr12	9250814	9251730	917	9251267	61	21.1404	14.2847	20.9725
chr16	9251967	9252500	534	9252401	38	12.0182	9.52316	18.0939
chr6	9252406	9252957	552	9252830	27	9.54727	6.46214	9.45818
chr18	9259587	9260831	1245	9260017	86	29.3109	11.2715	24.591
chr10	9267751	9268897	1147	9268212	86	29.6647	20.0667	25.2682
chr18	9268589	9268900	312	9268685	29	6.32672	6.8063	7.08027
chr10	9277387	9277700	314	9277567	21	6.7795	5.44181	6.90083
chr4	9281492	9281755	264	9281653	14	5.11461	4.76158	8.2245
chr2	9283312	9283902	591	9283483	52	18.0716	12.2441	17.6827
chr16	9284037	9284430	394	9284225	28	9.88824	6.12203	5.52066
chr9	9295509	9296190	682	9295995	33	8.51398	8.74645	9.66116
chr19	9303680	9304498	819	9304032	60	20.7994	16.7714	17.5971
chr19	9310681	9311049	369	9310863	25	8.01214	6.12203	7.81328
chr1	9313087	9313624	538	9313514	19	5.94916	7.8226	6.5796
chr2	9314677	9315430	754	9315031	56	19.4355	11.904	15.2153
chr17	9326941	9329134	2194	9328271	144	44.6831	35.3717	48.5246
chr16	9328445	9328716	272	9328616	19	5.00822	6.80226	5.8657
chr3	9329532	9329851	320	9329717	29	10.2292	7.8226	7.40205
chr2	9332242	9332715	474	9332466	23	8.18337	5.15278	10.2806
chr16	9338119	9338468	350	9338300	25	8.86532	5.78192	6.16838
chr7	9342043	9342307	265	9342180	19	6.73813	3.29438	4.83058
chr10	9342175	9343101	927	9342624	69	23.8682	18.0347	21.6584
chrX	9346155	9346613	459	9346274	23	6.00987	7.8226	7.40205
chrX	9349282	9349572	291	9349398	17	5.35424	3.29438	5.7799
chr2	9351415	9353190	1776	9352423	216	73.9913	56.1186	41.9152
chr7	9352066	9352541	476	9352293	44	15.3438	13.9446	15.2153
chr8	9363182	9364670	1489	9364205	128	43.9856	31.2904	50.5807
chrX	9369194	9369682	489	9369456	21	7.50143	7.48248	4.9347
[truncated: 37,478 more rows]

## Sheet: MACS_LacZ_Input
chr	start	end	length	abs_summit	pileup	LacZ_Input_1_fold enrichment	LacZ_Input_2_fold enrichment	LacZ_Input_3_fold enrichment
chr1	3319106	3319969	864	3319548	65	25.7364	10.4559	12.1111
chr1	3652645	3653594	950	3653175	96	37.8247	10.9105	14.115
chr1	3831968	3833317	1350	3832691	119	46.7934	10.4559	16.7249
chr1	5816771	5818357	1587	5817297	128	50.3029	16.8203	24.2222
chr1	6417720	6418847	1128	6418270	103	33.1249	12.2743	20.7619
chr1	6539904	6540463	560	6540090	34	13.6481	7.27365	9.80423
chr1	7822028	7823381	1354	7822722	156	61.2214	22.2755	28.2593
chr1	9568292	9569038	747	9568721	64	25.3464	8.63746	5.88427
chr1	9694660	9695560	901	9695108	74	29.2459	5.45524	10.381
chr1	9762878	9763706	829	9763316	55	20.7604	7.27365	12.1111
chr1	9854154	9855303	1150	9854623	115	36.947	15.8148	22.2762
chr1	10135754	10136757	1004	10136098	62	16.2135	9.54667	12.2885
chr1	10315726	10317287	1562	10316542	185	72.5298	34.6237	39.8148
chr1	11217334	11218040	707	11217514	39	15.5978	6.36444	6.92064
chr1	11576291	11577820	1530	11577201	122	47.9633	14.0927	17.8783
chr1	12028364	12029615	1252	12028968	130	51.0828	8.63746	12.6878
chr1	12402305	12403454	1150	12402732	90	35.485	13.1835	16.7249
chr1	12871082	12872014	933	12871530	48	19.1073	8.63746	11.5344
chr1	12970411	12971340	930	12970870	54	21.447	5.45524	8.40611
chr1	13295034	13295706	673	13295242	40	15.9878	8.10625	7.37312
chr1	13399511	13400408	898	13399921	78	30.8057	13.2858	17.8783
chr1	13433017	13434313	1297	13433684	115	21.9727	16.9093	24.799
chr1	13451624	13452419	796	13452004	42	16.7676	5.90984	6.39004
chr1	14331161	14332489	1329	14331742	128	50.3029	23.1848	36.3333
chr1	14728230	14729071	842	14728555	42	16.7676	7.27365	5.7672
chr1	14771461	14772271	811	14771926	75	29.6358	9.54667	12.2885
chr1	15049462	15050838	1377	15050173	151	59.2717	10.9105	20.7619
chr1	15565716	15566525	810	15566097	94	30.2583	16.8203	16.2209
chr1	15795354	15796306	953	15795739	49	19.4973	7.72825	8.65079
chr1	15839189	15840062	874	15839617	70	27.6861	4.02893	10.381
chr1	16216798	16217584	787	16217210	64	25.3464	4.8948	8.65079
chr1	16294199	16295222	1024	16294691	90	35.485	12.7289	11.3055
chr1	16445759	16446267	509	16446071	45	16.0436	6.02187	10.9577
chr1	16825187	16825871	685	16825597	50	13.237	7.6518	9.80423
chr1	17484785	17485349	565	17484956	34	13.6481	6.36444	6.34392
chr1	17520519	17521304	786	17520908	64	25.3464	9.65919	13.0277
chr1	18640101	18640993	893	18640547	86	33.9252	8.05203	9.80423
chr1	18766365	18766895	531	18766708	35	14.038	7.27365	10.381
chr1	19202692	19203518	827	19203009	100	39.3845	8.63746	10.9577
chr1	19504397	19504946	550	19504559	44	17.5475	7.27365	6.34392
chr1	19724263	19725048	786	19724707	122	47.9633	13.1835	20.1852
chr1	20805752	20806245	494	20805909	52	20.6671	9.09206	6.75788
chr1	20917794	20918534	741	20918085	31	11.8631	8.18286	5.97172
chr1	21024247	21025700	1454	21024904	256	81.8567	34.0248	39.7246
chr1	21559449	21559983	535	21559682	47	18.7174	5.45524	7.86466
chr1	21738047	21738429	383	21738274	30	12.0883	10.0013	5.19048
chr1	22262987	22263804	818	22263440	57	22.6168	6.81905	6.34392
chr1	22285952	22286705	754	22286358	92	36.2649	13.6381	15.5714
chr1	22533173	22533813	641	22533445	34	13.6481	6.36444	4.03704
chr1	23313953	23314672	720	23314368	32	12.8682	6.36444	6.92064
chr1	23388250	23389080	831	23388673	46	18.3274	7.27365	8.84774
chr1	23493257	23493707	451	23493486	27	10.9185	6.81905	8.65079
chr1	23555640	23557274	1635	23556827	69	27.2962	11.2728	13.8413
chr1	23766939	23767627	689	23767236	74	29.2459	10.4676	15.5714
chr1	24315451	24316154	704	24315783	45	14.6514	9.54667	13.2645
chr1	24384650	24385380	731	24385009	66	24.8383	10.8183	9.43926
chr1	24430858	24431686	829	24431282	51	20.2771	6.44163	10.9577
chr1	25012070	25013164	1095	25012481	165	64.7309	20.5327	29.4127
chr1	25198521	25199682	1162	25199136	86	33.9252	18.1841	25.9524
chr1	25458898	25460379	1482	25459709	172	67.4605	21.8209	27.6825
chr1	25688632	25689497	866	25689052	96	35.96	12.7583	20.7619
chr1	26179575	26181142	1568	26180427	139	54.5923	21.3664	25.3757
chr1	26561395	26562347	953	26561792	68	26.9062	6.81905	13.8413
chr1	28834453	28835477	1025	28834880	110	43.2839	5.90984	13.2645
chr1	29746952	29747911	960	29747490	107	34.3989	10.9105	14.9947
chr1	29914125	29915108	984	29914662	108	42.504	10.0013	10.381
chr1	30006884	30007543	660	30007307	32	8.5651	6.36444	5.19048
chr1	30475904	30476586	683	30476295	45	17.9375	6.30148	8.65079
chr1	30553634	30554222	589	30553833	55	21.8369	5.00063	6.92064
chr1	30592372	30594021	1650	30593102	140	44.9097	27.2762	40.3704
chr1	30738141	30739152	1012	30738667	106	41.7241	16.8203	15.2007
chr1	30768093	30768882	790	30768481	45	14.6514	10.9105	9.80423
chr1	32424404	32425201	798	32424738	93	36.6549	9.06509	13.2645
chr1	32428310	32429123	814	32428742	33	10.8293	6.81905	5.7672
chr1	32494034	32494807	774	32494450	51	20.2771	6.36444	8.65079
chr1	32787531	32788873	1343	32788190	170	44.3828	13.1835	25.3757
chr1	32928416	32929312	897	32928858	87	34.3152	7.27365	9.22752
chr1	32975048	32975827	780	32975475	37	14.8179	5.00063	6.79706
chr1	33239357	33241194	1838	33240277	137	43.9542	20.4571	32.2963
chr1	33738804	33740560	1757	33739831	160	62.7812	26.367	32.8525
chr1	33878797	33879692	896	33879284	94	37.0448	4.70042	6.92064
chr1	34041374	34042110	737	34041767	68	26.9062	11.3651	16.1482
chr1	34086047	34086856	810	34086465	41	16.3777	5.75858	13.8413
chr1	34455305	34456035	731	34455565	57	19.0982	8.18286	10.3224
chr1	34456962	34457876	915	34457504	42	16.7676	5.90984	9.22902
chr1	34664122	34664940	819	34664534	54	20.3897	9.09206	15.5714
chr1	34664122	34664940	819	34664534	54	20.3897	9.09206	4.03704
chr1	34811533	34812058	526	34811668	25	10.1386	5.81938	9.79912
chr1	35054412	35055193	782	35054781	72	28.466	10.9105	13.8413
chr1	35077863	35079472	1610	35078675	131	51.4728	10.0013	25.3757
chr1	35258234	35258937	704	35258679	99	31.8508	10.4559	29.4127
chr1	35286535	35287822	1288	35287145	151	59.2717	16.8203	25.5602
chr1	35785361	35785922	562	35785504	53	14.0156	5.00063	6.9526
chr1	36160412	36161388	977	36160854	51	16.5624	5.37839	10.8089
chr1	36540391	36541193	803	36540819	36	13.4625	8.83366	10.8139
chr1	36610304	36611892	1589	36611537	75	22.509	5.60249	12.2885
chr1	36652316	36652976	661	36652568	60	22.0588	5.02278	8.82641
chr1	36975639	36976418	780	36975983	58	15.3133	7.72825	6.92064
chr1	37054915	37055686	772	37055213	25	9.06812	8.06422	5.7672
chr1	37112446	37113318	873	37112847	75	29.6358	11.3651	10.4891
chr1	37190711	37191568	858	37191126	84	33.1453	11.6754	13.2716
chr1	37198353	37199135	783	37198705	68	26.9062	5.03616	11.5344
chr1	37367486	37368162	677	37367940	52	16.528	7.92753	12.9157
chr1	37495840	37496885	1046	37496273	92	36.2649	3.5285	12.4613
chr1	37698008	37698770	763	37698312	61	24.1766	6.18188	9.06275
chr1	37882703	37882982	280	37882782	35	9.34374	5.90984	6.34392
chr1	38294787	38295562	776	38295128	70	27.6861	5.45524	9.2227
chr1	38314488	38316297	1810	38315502	148	47.4577	20.9056	29.9894
chr1	38637502	38638324	823	38637921	56	22.2269	10.9105	7.44809
chr1	38652278	38653595	1318	38653033	78	30.8057	11.6754	12.4863
chr1	38652278	38653595	1318	38653033	78	30.8057	11.6754	4.88785
chr1	38697746	38698631	886	38698235	42	16.7676	9.09206	12.1111
chr1	38720039	38720605	567	38720440	40	13.0588	6.36444	7.36348
chr1	39032658	39033167	510	39032984	47	18.7174	9.54667	8.49633
chr1	39066558	39067054	497	39066775	23	9.35868	4.09143	5.19048
chr1	39587529	39588757	1229	39588309	112	44.0638	6.30148	15.5714
chr1	39615087	39616158	1072	39615745	84	33.1453	10.9105	17.8783
chr1	39823976	39824463	488	39824206	57	18.4735	6.36444	5.8985
chr1	40059613	40060427	815	40059836	22	5.96961	5.45524	4.61376
chr1	40436701	40437626	926	40437194	80	17.7396	12.1529	11.5344
chr1	40472559	40473991	1433	40473410	145	56.932	14.5473	17.3016
chr1	40583719	40584691	973	40584181	81	25.5717	12.8833	13.2716
chr1	40808167	40809155	989	40808760	71	28.076	11.3651	11.3055
chr1	40981137	40981656	520	40981287	44	17.5475	8.05203	12.6878
chr1	41674981	41676119	1139	41675515	87	34.3152	7.38637	12.1889
chr1	41685697	41686359	663	41686124	64	20.7031	6.81905	6.92064
chr1	41869974	41870689	716	41870324	56	18.155	6.84423	6.34392
chr1	42144406	42145161	756	42144735	31	12.4782	6.44163	8.65079
chr1	42282579	42283571	993	42283023	75	29.6358	10.9105	9.83083
chr1	42399522	42400446	925	42400003	63	24.9565	9.66244	6.34392
chr1	42486577	42487204	628	42486843	60	23.7867	9.09206	8.07408
chr1	42566859	42567540	682	42567087	72	18.947	8.45463	10.9577
chr1	42713162	42713450	289	42713318	23	9.35868	5.90984	5.19048
chr1	42810970	42811816	847	42811366	58	15.3133	9.54667	9.33928
chr1	42909249	42909597	349	42909439	25	10.1386	5.90984	6.25777
chr1	43238543	43239306	764	43239004	57	18.4735	10.4676	8.49633
chr1	43321008	43321798	791	43321378	58	23.0068	8.18286	7.49736
chr1	43366790	43367679	890	43367268	62	24.5665	4.95117	7.49736
chr1	43584371	43585229	859	43584773	57	22.6168	10.4559	8.65079
chr1	44085780	44086654	875	44086161	76	30.0258	8.63746	10.381
chr1	44090489	44091817	1329	44091013	132	51.8627	12.7289	20.1852
chr1	44342171	44343026	856	44342607	67	26.5163	6.81905	14.418
chr1	44859517	44860269	753	44859878	36	11.7848	6.81905	6.88158
chr1	45820012	45820820	809	45820379	45	10.0743	6.36444	7.49736
chr1	46379315	46380934	1620	46380210	162	51.9169	22.1431	31.1429
chr1	46668498	46669026	529	46668622	26	8.59973	7.72825	4.61376
chr1	46849693	46850753	1061	46850321	72	28.466	7.72825	9.80423
chr1	46930058	46930791	734	46930261	40	15.9878	6.81905	8.65079
chr1	47327872	47328572	701	47328196	41	16.3777	5.90984	6.92064
chr1	47502705	47503527	823	47502986	76	24.5252	4.36467	13.2645
chr1	47759985	47760810	826	47760424	35	14.038	4.36467	4.53137
chr1	48380240	48381244	1005	48380492	52	20.6671	5.00063	8.84774
chr1	49131826	49132442	617	49132059	54	21.447	8.63746	12.1111
chr1	49364667	49365403	737	49365190	68	26.9062	7.27365	10.9577
chr1	50029684	50030716	1033	50030139	52	20.6671	5.90984	11.3055
chr1	51638058	51638873	816	51638497	69	27.2962	7.27365	14.9947
chr1	51870389	51871488	1100	51871071	62	21.9728	5.03616	6.92064
chr1	51874138	51874997	860	51874675	64	25.3464	5.63642	6.72488
chr1	52159668	52160785	1118	52160386	59	23.3967	5.18273	10.381
chr1	52213164	52214186	1023	52213727	57	18.4735	8.05203	12.2885
chr1	52757065	52758699	1635	52757915	142	55.7622	20.4571	32.2963
chr1	52918850	52919621	772	52919265	68	26.9062	6.37913	7.16885
chr1	52927029	52927952	924	52927546	70	27.6861	8.18286	6.92064
chr1	54165934	54167295	1362	54166455	117	46.0135	11.3651	13.5721
chr1	54558552	54559318	767	54558963	87	19.2726	5.45524	6.92064
chr1	54861278	54862166	889	54861689	51	11.3884	4.8948	8.07408
chr1	55045029	55046040	1012	55045589	54	19.1826	8.51568	10.9577
chr1	55639020	55639483	464	55639134	43	17.1576	6.36444	7.49736
chr1	55671737	55672659	923	55672168	43	17.1576	10.9105	10.9279
chr1	55736641	55737292	652	55736898	58	23.0068	5.90984	14.9947
chr1	55748106	55749423	1318	55748678	116	45.6236	19.5479	27.1058
chr1	55868416	55869228	813	55868885	75	21.4316	5.70765	12.1111
chr1	55931934	55933418	1485	55932670	196	43.1444	26.9743	29.8417
chr1	55986858	55987753	896	55987320	67	26.5163	6.81905	10.381
chr1	56393333	56394289	957	56393751	104	40.9442	4.02893	9.22752
chr1	56838595	56839427	833	56838984	67	26.5163	7.27365	8.65079
chr1	56888639	56889756	1118	56889296	72	28.466	10.0013	9.80423
chr1	56989029	56989746	718	56989362	46	14.9699	9.09206	12.6878
chr1	57200806	57201259	454	57200997	35	14.038	7.64943	7.36348
chr1	57215834	57217210	1377	57216349	111	24.5288	15.0019	27.7547
chr1	57547838	57549862	2025	57549049	190	74.4795	18.1841	27.6825
chr1	57621442	57622664	1223	57622202	115	36.947	11.3651	14.418
chr1	57752939	57753768	830	57753373	48	19.1073	6.36444	6.34392
chr1	57998206	57999171	966	57998705	82	32.3655	5.3719	11.5344
chr1	58009346	58010111	766	58009664	78	30.8057	5.45524	5.88427
chr1	58150306	58150849	544	58150492	56	22.2269	10.8702	15.5714
chr1	58218996	58219597	602	58219183	34	13.6481	10.0013	7.86466
chr1	58277626	58278716	1091	58278081	78	30.2384	9.73221	21.9154
chr1	59328768	59329554	787	59329159	46	14.9699	8.5329	10.381
chr1	59591846	59592785	940	59592318	110	35.3544	20.1301	25.3757
chr1	59601515	59602691	1177	59602160	110	39.6529	15.7015	14.317
chr1	59961494	59962251	758	59961845	85	27.3917	7.27365	7.05749
chr1	59966443	59966939	497	59966755	48	19.1073	5.63642	10.381
chr1	60231222	60231797	576	60231665	51	15.4009	6.81905	6.34392
chr1	60615822	60616585	764	60616262	69	27.2962	5.90984	7.05749
chr1	61236731	61237441	711	61236982	46	18.3274	6.36444	8.14325
chr1	61243731	61244483	753	61244147	66	26.1263	6.36444	10.381
chr1	61303654	61304628	975	61304142	90	35.485	7.27365	7.5655
chr1	61706559	61706870	312	61706712	33	7.44625	6.36444	3.93233
chr1	61744042	61746277	2236	61744934	232	90.8572	32.6107	38.3402
chr1	61970081	61971132	1052	61970524	94	37.0448	7.27365	8.65079
chr1	62005906	62006961	1056	62006556	100	39.3845	10.0013	11.5344
chr1	62111736	62112337	602	62112019	31	8.30555	5.45524	6.5146
chr1	62205780	62206939	1160	62206461	111	43.6739	13.1835	20.7619
chr1	63106839	63107700	862	63107143	47	15.2884	6.04651	9.62917
chr1	63182717	63183538	822	63183122	69	25.9505	8.15055	8.3562
chr1	63225685	63226242	558	63226079	34	13.6481	7.05062	10.381
chr1	63236670	63237498	829	63237040	42	15.8413	4.54603	7.24058
chr1	63362830	63363735	906	63363310	73	28.8559	6.36444	10.9577
chr1	63415780	63416699	920	63416125	84	33.1453	8.63746	16.1482
chr1	63434861	63437426	2566	63435428	111	35.6729	13.6381	23.6455
chr1	63434861	63437426	2566	63435428	111	35.6729	13.6381	15.4183
chr1	63434861	63437426	2566	63435428	111	35.6729	16.8203	23.6455
chr1	63434861	63437426	2566	63435428	111	35.6729	16.8203	15.4183
chr1	64040512	64041030	519	64040621	33	7.44625	5.53428	7.05749
chr1	64101933	64102890	958	64102455	84	33.1453	13.1835	9.22752
chr1	64131123	64131896	774	64131510	71	28.076	6.81905	21.3386
chr1	64603394	64604175	782	64603832	66	26.1263	7.72825	8.65079
chr1	64670938	64672909	1972	64672313	119	46.7934	18.1841	25.3757
chr1	64819254	64820314	1061	64819927	56	22.2269	6.04651	8.84774
chr1	65139094	65139756	663	65139275	52	20.6671	6.33444	10.9577
chr1	65758247	65758726	480	65758544	40	15.9878	6.36444	12.1111
chr1	66386774	66387556	783	66387113	57	22.6168	5.3719	9.80423
chr1	66652117	66652690	574	66652535	52	20.6671	7.27365	6.75788
chr1	66882750	66884188	1439	66883502	113	36.31	20.0025	25.3757
chr1	67049139	67050217	1079	67049765	109	42.894	10.0013	15.5714
chr1	67215093	67216108	1016	67215506	52	20.6671	9.09206	9.22752
chr1	67293585	67294743	1159	67294080	114	36.6285	14.5473	17.8783
chr1	68372457	68373207	751	68372775	69	27.2962	8.05203	15.8598
chr1	69173470	69174082	613	69173690	55	17.8365	6.81905	4.42387
chr1	69485010	69486003	994	69485558	77	30.4157	10.4559	9.06275
chr1	70068943	70070001	1059	70069415	86	33.9252	7.64943	6.88158
chr1	70588118	70588990	873	70588556	52	20.6671	5.45524	6.34392
chr1	70869450	70870208	759	70869774	50	17.7875	4.54603	6.92064
chr1	70977270	70977818	549	70977506	36	11.7848	7.72825	7.86466
chr1	71156703	71157245	543	71157134	38	15.2079	6.81905	8.07408
chr1	71294518	71295016	499	71294682	47	15.2884	10.4559	5.19048
chr1	71488830	71489717	888	71489290	51	20.2771	11.3651	12.1111
chr1	71578472	71579105	634	71578716	36	14.428	7.72825	8.65079
chr1	71656649	71657575	927	71657052	103	40.5543	13.1835	11.5344
chr1	71804961	71805622	662	71805198	34	13.6481	4.54603	4.62336
chr1	71920117	71920472	356	71920282	30	12.0883	6.75159	13.0292
chr1	71935565	71936651	1087	71935920	46	18.3274	8.10625	5.51348
chr1	72168335	72169022	688	72168743	55	17.8365	6.09195	8.40611
chr1	72318112	72319017	906	72318733	46	18.3274	9.45222	10.8139
chr1	72452969	72453711	743	72453317	32	12.8682	6.03902	9.62917
chr1	72458330	72459348	1019	72458803	105	41.3342	19.5479	16.2865
chr1	72898361	72899259	899	72898789	83	31.1406	12.3727	10.0873
chr1	72930302	72931349	1048	72930807	84	33.1453	10.0013	20.1852
chr1	73365326	73366259	934	73365781	79	25.4807	8.85723	11.7685
chr1	73368590	73369439	850	73368929	49	19.4973	4.54603	5.7672
chr1	73561454	73562467	1014	73561905	72	28.466	10.4559	8.3562
chr1	73780339	73781131	793	73780752	72	28.466	10.8702	12.6878
chr1	74049735	74051935	2201	74051349	88	34.5145	15.7537	22.0905
chr1	74391304	74392143	840	74391764	89	23.3593	12.0868	11.0131
chr1	74584604	74585491	888	74585083	83	18.3966	13.6884	21.9951
chr1	74643947	74644700	754	74644339	56	18.155	12.4807	14.418
chr1	74777906	74778636	731	74778296	40	15.9878	6.39967	10.6238
chr1	75286548	75287712	1165	75287179	112	42.9732	16.3657	13.3601
chr1	75288736	75289490	755	75289118	54	14.8012	6.75159	7.5655
chr1	75299904	75300535	632	75300155	48	18.6344	5.90984	4.68708
chr1	75440448	75441861	1414	75441130	135	52.3964	18.1302	29.5421
chr1	75684552	75684896	345	75684697	28	9.23674	6.75159	5.8985
chr1	75697957	75698782	826	75698378	80	31.5856	7.27365	7.86466
chr1	75779432	75780846	1415	75780053	106	39.6672	19.5479	19.0317
chr1	75893468	75894183	716	75893780	44	14.3329	5.03616	13.8413
chr1	76015547	76016965	1419	76016155	110	24.3098	16.9093	23.0688
chr1	76647177	76647983	807	76647624	61	24.1766	9.09206	6.34392
chr1	76769443	76769928	486	76769643	35	14.038	6.81905	8.07408
chr1	77067079	77067863	785	77067432	40	15.9878	5.90984	10.9577
chr1	77103706	77104443	738	77104090	59	23.3967	8.63746	5.7672
chr1	77340360	77340866	507	77340718	44	14.3329	6.81905	6.05157
chr1	77387434	77388214	781	77387780	75	23.7005	12.2743	19.6085
chr1	77934213	77935672	1460	77934898	150	58.8817	29.5492	23.1275
chr1	78113638	78114644	1007	78114194	54	21.447	7.64943	7.49736
chr1	78444221	78444778	558	78444443	44	11.6797	5.45524	6.88158
chr1	78794336	78795204	869	78794737	75	29.6358	10.0013	13.2645
chr1	79370795	79371473	679	79371056	56	22.2269	7.72825	9.22752
chr1	79388712	79390170	1459	79389488	138	54.2024	19.5479	10.4274
chr1	79485632	79486341	710	79485905	60	23.7867	7.24683	9.22752
chr1	80228472	80229237	766	80228881	41	13.3773	5.63642	4.91541
chr1	80300090	80302384	2295	80301816	125	49.1331	6.36444	9.80423
chr1	80300090	80302384	2295	80301816	125	49.1331	6.36444	16.7249
chr1	80300090	80302384	2295	80301816	125	49.1331	9.09206	9.80423
chr1	80300090	80302384	2295	80301816	125	49.1331	9.09206	16.7249
chr1	80421661	80422210	550	80422031	55	21.8369	4.46059	8.3562
chr1	81000103	81001031	929	81000524	52	20.6671	6.36444	8.07408
chr1	81209467	81210335	869	81209876	68	26.9062	8.63746	15.5714
chr1	81309359	81310390	1032	81309871	116	45.6236	13.1835	16.1482
chr1	81372126	81373149	1024	81372672	71	28.076	7.72825	10.8577
chr1	82647876	82648713	838	82648300	45	17.9375	8.63746	13.2645
chr1	83436277	83437442	1166	83436790	131	42.0431	11.3651	13.8413
chr1	83582663	83583298	636	83583008	33	13.2581	5.47066	7.49736
chr1	84129826	84130546	721	84130261	61	24.1766	6.81905	9.33928
chr1	84233454	84234047	594	84233829	52	20.6671	4.54603	7.49736
chr1	84392930	84393742	813	84393314	64	20.7031	5.45524	12.1111
chr1	84500038	84500549	512	84500317	45	14.6514	10.0013	8.3791
chr1	84886585	84887129	545	84886967	35	12.0562	7.0467	6.17708
chr1	85929766	85930570	805	85930189	57	22.6168	9.09206	10.762
chr1	86275339	86275613	275	86275514	32	8.5651	4.8948	5.79247
chr1	86277053	86278492	1440	86277707	130	28.69	15.8649	22.8011
chr1	86674421	86675379	959	86674898	72	23.2511	10.3307	11.7325
chr1	86810109	86811596	1488	86811022	156	50.0058	19.3249	25.9524
chr1	87160868	87161600	733	87161221	33	10.8293	7.27365	7.49736
chr1	87631601	87632734	1134	87632181	116	43.6491	16.3657	15.7293
chr1	88172072	88172916	845	88172529	72	28.466	9.54667	11.3055
chr1	88286359	88287221	863	88286877	66	14.6735	5.04345	6.51713
chr1	88655028	88655869	842	88655424	100	37.4429	14.9356	21.7153
chr1	89025357	89026336	980	89025637	36	14.428	4.54603	8.53333
chr1	89074363	89074924	562	89074661	36	8.10327	4.97854	4.62336
chr1	89103760	89104804	1045	89104214	89	23.3593	17.2749	17.2039
chr1	89449079	89450053	975	89449611	85	18.8346	8.50009	18.455
chr1	89935761	89936107	347	89935883	24	9.74863	6.36444	5.7672
chr1	90160202	90160976	775	90160581	70	18.4279	10.4676	10.0245
chr1	90722762	90723043	282	90722990	25	10.1386	8.18286	5.7672
chr1	90956226	90957276	1051	90956903	81	31.9755	8.85723	5.32135
chr1	91092802	91093381	580	91093014	34	10.9147	8.63746	6.39004
chr1	91227221	91227996	776	91227533	31	11.0951	6.44163	8.6887
chr1	91384151	91384774	624	91384536	69	19.7396	7.72825	9.80423
chr1	91567428	91568400	973	91567862	68	26.9062	8.18286	17.8928
chr1	91585049	91585785	737	91585337	48	19.1073	6.57092	8.84774
chr1	91955298	91956117	820	91955676	57	18.4735	7.19823	9.22752
chr1	91959376	91960471	1096	91959963	106	40.9558	15.0019	18.6919
chr1	92027518	92028229	712	92027796	58	19.4275	7.24683	8.14325
chr1	92501313	92501931	619	92501572	42	16.7676	7.64943	9.22752
chr1	92931240	92932163	924	92931770	75	29.6358	8.85723	8.47227
chr1	92947487	92948042	556	92947849	57	17.1779	6.71488	11.027
chr1	93024389	93025237	849	93024830	53	21.057	4.78868	9.83083
chr1	93076225	93076555	331	93076424	28	6.35121	4.78868	8.83296
chr1	93373796	93374424	629	93374189	41	13.3773	9.54667	8.40611
chr1	94033381	94033738	358	94033559	26	10.0095	5.45524	5.7672
chr1	94496390	94497441	1052	94496901	103	40.5543	15.7859	24.799
chr1	95002525	95003841	1317	95003296	104	40.9442	18.6387	27.5263
chr1	95667492	95667908	417	95667719	45	17.0532	5.63642	7.37312
chr1	95684484	95685410	927	95684953	77	30.4157	8.18286	9.80423
chr1	96165625	96166480	856	96166185	80	31.5856	9.40083	19.6085
chr1	96203917	96204944	1028	96204547	76	30.0258	5.75858	9.22752
chr1	96507403	96507699	297	96507516	38	12.4218	7.67961	10.9577
chr1	96664873	96665611	739	96665196	71	22.9326	6.81905	6.88158
chr1	97635873	97636864	992	97636283	60	19.429	8.85723	12.6878
chr1	97900730	97901588	859	97901177	80	31.5856	9.09206	17.3016
chr1	98532866	98533763	898	98533326	43	17.1576	13.1835	6.60786
chr1	98694103	98694907	805	98694404	34	13.6481	8.18286	6.30458
chr1	99149743	99150514	772	99150145	62	24.5665	7.27365	16.1482
chr1	100770758	100771578	821	100771393	89	35.0951	8.63746	10.381
chr1	101017350	101019201	1852	101018401	165	52.8724	13.6381	20.7619
chr1	101916428	101917235	808	101916769	77	30.4157	8.18286	14.418
chr1	103899969	103900810	842	103900430	77	30.4157	8.18286	17.3016
chr1	104195263	104196138	876	104195635	96	37.8247	16.3657	17.8783
chr1	104576400	104577750	1351	104577270	146	57.3219	20.4571	23.0688
chr1	105224124	105224811	688	105224443	36	13.7167	6.36444	6.34392
chr1	105948417	105948988	572	105948607	50	19.8872	6.18188	7.64131
chr1	106543769	106544448	680	106544184	56	22.2269	8.18286	10.8139
chr1	107213003	107213859	857	107213433	48	19.1073	7.27365	7.49736
chr1	107250521	107250809	289	107250630	32	10.5108	6.81905	5.7672
chr1	107645427	107646237	811	107645816	73	23.0769	4.53664	13.0277
chr1	108151285	108151823	539	108151637	34	11.1478	6.81905	6.92064
chr1	109901225	109902372	1148	109901816	105	41.3342	7.72825	13.8413
chr1	110386601	110387469	869	110387013	86	33.9252	5.45524	10.381
chr1	111018593	111019113	521	111018909	64	25.3464	4.83122	3.46032
chr1	112381184	112381870	687	112381579	53	14.0156	10.4559	6.34392
chr1	112505675	112506615	941	112505933	61	24.1766	5.90984	5.19048
chr1	113179374	113180275	902	113179872	97	38.2146	9.09206	9.33928
chr1	113468065	113468957	893	113468477	100	39.3845	10.4559	12.6878
chr1	114532367	114532765	399	114532581	36	14.428	6.36444	7.49736
chr1	115218832	115219496	665	115219127	69	27.2962	9.54667	9.22752
chr1	115301923	115302449	527	115302240	33	13.2581	5.90984	4.03704
chr1	115577948	115578721	774	115578297	62	24.5665	7.72825	8.07408
chr1	116842012	116842987	976	116842523	79	31.1956	12.078	13.8413
chr1	116977726	116979397	1672	116978461	196	62.7462	29.5492	39.7937
chr1	117226785	117227796	1012	117227275	75	29.6358	6.36444	12.1111
chr1	117744922	117745977	1056	117745560	94	37.0448	13.1835	18.455
chr1	118757745	118758554	810	118758168	71	28.076	10.9105	17.3016
chr1	118948391	118949480	1090	118948993	79	13.3501	20.9118	18.1255
chr1	119306255	119307698	1444	119307124	124	48.7431	14.1013	20.7619
chr1	119434637	119435169	533	119434996	31	12.4782	5.90984	8.65079
chr1	119869374	119870127	754	119869814	45	16.0436	6.37913	10.762
chr1	120484614	120486166	1553	120485257	85	33.5353	13.6381	15.5714
chr1	120791248	120792116	869	120791688	67	26.5163	5.00063	7.49736
chr1	120863266	120865217	1952	120864380	176	69.0203	25.4578	38.3402
chr1	121079334	121080063	730	121079659	41	16.3777	7.05062	9.22752
chr1	121133803	121134747	945	121134319	88	34.7051	16.3657	17.8783
chr1	121252314	121253165	852	121252756	64	20.7031	9.09206	10.381
chr1	121530437	121530897	461	121530680	40	15.9878	5.90984	5.97172
chr1	121534506	121534820	315	121534681	33	13.2581	6.36444	6.88158
chr1	121536977	121537839	863	121537391	60	19.429	9.45222	8.84774
chr1	121661854	121662639	786	121662246	38	15.2079	7.27365	7.37312
chr1	121772687	121773370	684	121773029	44	17.5475	7.72825	5.19048
chr1	122023629	122024216	588	122024062	49	19.4973	5.90984	6.92064
chr1	122452530	122454042	1513	122453333	127	49.913	11.8197	20.1852
chr1	122583794	122584698	905	122584256	54	21.447	7.72825	8.65079
chr1	122622962	122624207	1246	122623773	82	32.3655	12.7289	9.80423
chr1	123679316	123680308	993	123679781	76	30.0258	11.2526	17.8783
chr1	123763159	123763932	774	123763494	44	17.5475	6.44163	10.381
chr1	123933805	123934842	1038	123934140	75	24.2066	11.3651	10.381
chr1	124941133	124942269	1137	124941687	126	49.523	10.4676	16.1482
chr1	125301054	125301510	457	125301204	33	13.2581	5.90984	4.91541
chr1	125497252	125497810	559	125497488	44	14.3329	6.81905	5.40695
chr1	126199986	126200557	572	126200154	58	23.0068	6.64114	10.9577
chr1	126215103	126215708	606	126215497	43	14.0144	6.81905	5.19048
chr1	126483636	126484521	886	126484149	55	19.5313	6.62237	10.4245
chr1	127278873	127279345	473	127279218	37	14.8179	8.10625	4.91541
chr1	127408711	127409421	711	127409227	70	22.6141	8.18286	10.0873
chr1	127711828	127712159	332	127712020	47	18.7174	5.63642	11.3284
chr1	127889048	127889756	709	127889253	65	23.0191	7.27365	8.07408
chr1	128583312	128584006	695	128583486	42	16.7676	5.45524	8.3562
chr1	128756665	128757473	809	128757072	67	21.2058	7.72825	8.07408
chr1	128987153	128987958	806	128987545	62	24.5665	6.62237	9.22752
chr1	129431725	129433187	1463	129432311	100	39.3845	5.45524	11.5344
chr1	129857319	129858710	1392	129858073	132	46.3869	18.9223	28.3211
chr1	130727557	130728854	1298	130728195	114	29.8481	12.7289	25.3757
chr1	130789321	130790156	836	130789737	75	25.0253	14.0927	16.9927
chr1	130813028	130813512	485	130813145	33	8.82465	6.81905	6.30458
chr1	131153265	131154142	878	131153772	64	20.7031	8.79948	15.2934
chr1	131360028	131360733	706	131360449	80	26.6716	8.50009	14.5355
chr1	131831718	131833979	2262	131832989	185	66.4454	18.4275	43.0785
chr1	132019510	132020261	752	132019854	72	24.0374	6.44163	9.33928
chr1	132058574	132059109	536	132058904	45	17.1612	4.70042	6.88158
chr1	132131048	132131704	657	132131296	24	4.7355	7.84109	13.4127
chr1	132244563	132244892	330	132244712	35	14.038	7.72825	5.40695
chr1	132365130	132366891	1762	132366136	157	55.1063	25.7665	35.5832
chr1	132559202	132560142	941	132559621	69	27.2962	7.24683	12.4613
chr1	132721278	132722448	1171	132721979	88	23.0998	10.8702	15.4466
chr1	132892939	132893980	1042	132893496	93	36.6549	15.0683	28.0776
chr1	133359061	133360078	1018	133359651	97	26.3731	10.0723	16.9927
chr1	133674330	133675008	679	133674704	56	19.8801	8.63746	10.381
chr1	133720404	133722075	1672	133721034	96	21.2437	8.06515	12.2885
chr1	133772808	133773875	1068	133773305	94	35.2185	18.3534	18.8255
chr1	133835676	133836214	539	133835879	33	13.2581	8.14671	8.49633
chr1	134059455	134060274	820	134059876	76	16.8636	9.17901	13.7632
chr1	134311255	134312370	1116	134311816	93	30.9523	12.8716	15.3617
chr1	134344571	134346222	1652	134345183	139	36.3368	10.0723	11.8888
chr1	134650729	134651839	1111	134651136	117	36.7982	18.4543	10.7533
chr1	134851856	134852877	1022	134852294	70	27.6861	6.9103	14.073
chr1	134924859	134927002	2144	134925999	164	52.5539	20.9118	27.1058
chr1	135169441	135170326	886	135169858	62	20.066	7.64943	13.0277
chr1	135429943	135430484	542	135430279	36	11.7848	5.85138	3.67103
chr1	135590286	135591092	807	135590634	84	33.1453	11.3651	20.6296
chr1	135661831	135662636	806	135662225	51	20.2771	7.64943	10.8577
chr1	135669889	135670495	607	135670307	57	17.1779	6.64114	7.81835
chr1	135691337	135691868	532	135691653	46	14.9699	7.24683	8.40611
chr1	135790737	135791910	1174	135791048	34	13.6481	6.36444	7.37312
chr1	136124519	136125069	551	136124748	44	14.3329	5.45524	6.5146
chr1	136231195	136232209	1015	136231617	69	26.1148	10.0456	15.097
chr1	136407739	136408470	732	136408107	58	15.3133	7.24683	7.82056
chr1	136679284	136680103	820	136679695	85	33.5353	8.63746	12.4863
chr1	136769665	136770893	1229	136770466	102	40.1643	9.54667	21.3386
chr1	137061265	137062666	1402	137062060	157	61.6113	22.1431	32.2963
chr1	137164406	137165067	662	137164643	58	23.0068	10.4559	9.66702
chr1	137267725	137268170	446	137267954	27	10.9185	6.36444	6.34392
chr1	137302645	137302983	339	137302771	51	13.4965	7.72825	10.381
chr1	137749645	137750470	826	137750067	93	36.6549	6.44163	10.1956
chr1	137843227	137843771	545	137843339	77	20.2448	6.37913	12.6878
chr1	138326317	138327221	905	138326821	65	24.4676	9.25984	8.65079
chr1	138838339	138839121	783	138838787	62	20.066	7.64943	10.381
chr1	139356762	139357755	994	139357226	73	28.8559	10.4559	8.65079
chr1	139434783	139435940	1158	139435468	117	46.0135	13.1835	19.0317
chr1	140512960	140513903	944	140513446	90	35.485	9.54667	12.1111
chr1	140521296	140522683	1388	140521806	98	38.6046	10.4559	17.3016
chr1	141375428	141376137	710	141375835	48	19.1073	7.72825	5.19048
chr1	142012985	142014056	1072	142013444	86	33.9252	14.5473	14.9947
chr1	142069035	142071691	2657	142069745	223	87.3477	23.7535	22.4921
chr1	142137961	142139142	1182	142138672	106	41.7241	8.85723	14.9947
chr1	142974868	142976100	1233	142975606	79	31.1956	5.00063	10.3148
chr1	143206386	143207190	805	143206859	77	24.8437	9.09206	9.80423
chr1	143774897	143775702	806	143775271	42	13.6959	5.45524	6.17708
chr1	143857105	143858031	927	143857602	45	17.9375	6.44163	12.1111
chr1	143945609	143946607	999	143946161	75	29.6358	8.63746	13.2645
chr1	144334658	144335897	1240	144335211	101	39.7744	18.6387	21.3386
chr1	145408413	145409356	944	145408908	92	36.2649	6.36444	8.07408
chr1	145650820	145652147	1328	145651694	75	29.6358	9.25984	12.7801
chr1	145654184	145655270	1087	145654677	108	42.504	5.00063	12.1111
chr1	146318245	146320076	1832	146319218	187	73.3097	19.0933	35.7566
chr1	148689840	148690808	969	148690366	72	28.466	8.05785	12.6878
chr1	149579590	149580362	773	149580011	64	25.3464	6.03902	9.80423
chr1	149966911	149967658	748	149967263	46	14.9699	5.23382	8.07408
chr1	150545215	150546826	1612	150546049	173	45.1614	16.3657	20.2736
chr1	150582784	150583509	726	150583021	67	26.5163	8.05203	11.6376
chr1	150685914	150687233	1320	150686662	75	29.6358	8.63746	15.2934
chr1	151233683	151234837	1155	151234135	50	19.8872	9.09206	13.8413
chr1	151249432	151250346	915	151250001	107	42.1141	10.4559	18.455
chr1	151336133	151337076	944	151336646	50	19.8872	3.74308	8.07408
chr1	151432735	151434467	1733	151433380	175	61.3842	19.5479	18.248
chr1	151693973	151694281	309	151694110	32	12.8682	8.45463	7.37312
chr1	151776989	151777796	808	151777363	61	24.1766	13.6381	16.1482
chr1	152104091	152104864	774	152104428	43	17.1576	8.18286	6.72488
chr1	152237570	152238415	846	152237997	55	17.8365	5.23382	10.9577
chr1	152250709	152251622	914	152251106	78	25.1622	8.18286	9.80423
chr1	152468730	152470299	1570	152469714	169	66.2907	16.1157	31.7196
chr1	152772812	152773706	895	152773165	57	21.5018	9.09206	7.49736
chr1	153356072	153357028	957	153356504	44	11.6797	7.72825	10.1956
chr1	153434110	153434967	858	153434572	98	30.8731	9.3267	10.1368
chr1	153589463	153591488	2026	153590739	160	62.7812	16.6999	25.0686
chr1	153635697	153636021	325	153635896	35	6.00753	6.36444	5.46397
chr1	153693289	153694236	948	153693993	63	16.6111	12.7289	16.4978
chr1	153699471	153700265	795	153699817	55	20.7604	7.24683	8.42328
chr1	153753953	153754539	587	153754252	43	17.1576	6.36444	10.8577
chr1	153868033	153869114	1082	153868560	112	44.0638	13.1835	22.4921
chr1	154231777	154232862	1086	154232338	92	36.2649	11.3651	16.1482
chr1	154250956	154252435	1480	154251806	140	54.9823	16.8203	24.799
chr1	154420907	154421804	898	154421320	107	42.1141	10.4081	16.1482
chr1	154625467	154626187	721	154625687	48	12.7179	8.45463	10.9457
chr1	155298277	155298723	447	155298508	33	8.82465	5.45524	5.19048
chr1	155437599	155438416	818	155438032	88	23.0998	13.6381	21.3386
chr1	155578091	155579403	1313	155578653	88	34.7051	13.6381	17.8783
chr1	155785838	155786425	588	155786193	61	13.5785	7.15008	10.7066
chr1	155880603	155881441	839	155881045	73	28.8559	6.44163	7.46053
chr1	156426280	156426950	671	156426683	73	14.0171	4.28461	12.5503
chr1	156447787	156448926	1140	156448458	114	36.6285	16.2274	23.1699
chr1	156813328	156814817	1490	156814123	129	49.1211	15.498	20.6447
chr1	157251062	157251813	752	157251475	52	20.6671	8.10191	6.97496
chr1	158441211	158442119	909	158441755	52	20.6671	7.72825	6.34392
chr1	158549911	158551658	1748	158550542	119	44.4866	13.6381	13.8413
chr1	158549911	158551658	1748	158550542	119	44.4866	13.6381	9.22752
chr1	158578488	158579350	863	158578973	59	23.3967	6.81905	7.49736
chr1	158609663	158610720	1058	158610171	122	47.9633	13.1835	19.0317
chr1	158740051	158740718	668	158740429	64	25.3464	8.11372	10.381
chr1	159064010	159064703	694	159064352	46	18.3274	7.27365	10.381
chr1	159730835	159731642	808	159731239	67	26.5163	7.72825	7.49736
chr1	159820672	159821371	700	159821178	54	21.447	8.18286	8.07408
chr1	159852458	159853472	1015	159852938	81	31.9755	5.90984	14.9947
chr1	160147449	160148335	887	160147849	70	27.6861	6.44163	15.4577
chr1	160441512	160442538	1027	160441970	79	31.1956	19.0933	16.7249
chr1	160501513	160502912	1400	160502248	107	28.0312	11.8197	20.7619
chr1	160883439	160885697	2259	160884292	201	78.7689	29.0946	44.5674
chr1	162324739	162325696	958	162325167	76	30.0258	8.18286	9.80423
chr1	162533349	162534230	882	162533812	94	33.1335	14.1928	22.4921
chr1	162548114	162548787	674	162548620	44	17.0035	5.75351	6.30458
chr1	162772658	162773448	791	162773034	50	11.1694	5.18273	10.9577
chr1	162775138	162776228	1091	162775583	101	39.7744	15.2752	20.1852
chr1	163142706	163143562	857	163143089	56	22.2269	7.72825	10.9577
chr1	163269192	163269638	447	163269424	39	10.3819	6.36444	6.34392
chr1	163763202	163764340	1139	163763924	90	35.485	12.2743	13.8413
chr1	163849446	163850465	1020	163850066	83	26.7547	9.09206	9.80423
chr1	164159873	164160814	942	164160287	76	30.0258	7.24683	14.418
chr1	164367766	164369100	1335	164368400	123	46.5554	16.6463	23.5294
chr1	164818634	164819274	641	164818812	59	11.3652	8.63746	14.9947
chr1	165159075	165160328	1254	165159738	78	30.8057	10.4559	16.1482
chr1	165401682	165402725	1044	165402206	120	44.8573	16.2203	30.5868
chr1	165807672	165808028	357	165807894	32	9.77366	5.75858	4.20305
chr1	165849326	165850346	1021	165849806	62	13.7975	9.25984	14.7462
chr1	165963847	165964991	1145	165964239	103	40.5543	8.45463	9.33928
chr1	166059973	166061343	1371	166060729	66	23.3679	12.3638	19.6085
chr1	167347037	167347971	935	167347537	87	22.8403	11.2728	13.8701
chr1	167396878	167397691	814	167397311	82	30.7699	5.45524	12.6878
chr1	167804713	167805652	940	167805299	73	28.8559	9.09206	17.8783
chr1	167863821	167864999	1179	167864406	132	42.3616	16.3657	20.1852
chr1	167960686	167961227	542	167961091	46	18.3274	9.09206	6.5146
chr1	168012654	168013274	621	168012931	47	15.2884	7.72825	10.3148
chr1	168276224	168276928	705	168276505	50	18.9068	5.63642	7.49736
chr1	169217109	169217996	888	169217601	64	25.3464	5.90984	7.49736
chr1	169504304	169504994	691	169504723	46	18.3274	8.85723	9.80423
chr1	169670756	169671456	701	169671052	49	19.4973	6.81905	10.381
chr1	169775906	169777124	1219	169776445	111	43.6739	11.0795	21.6278
chr1	170011516	170012381	866	170011973	71	22.9326	14.4937	17.3016
chr1	170232399	170232879	481	170232754	38	15.2079	6.81905	8.65079
chr1	170632526	170633844	1319	170633185	137	53.8124	22.2755	25.9524
chr1	171006244	171006925	682	171006628	46	14.9699	5.90984	4.03704
chr1	171063721	171064785	1065	171063958	274	37.0675	17.3248	42.0695
chr1	171070725	171071540	816	171071372	66	11.3126	6.10364	9.62775
chr1	171071720	171072080	361	171071879	111	22.3733	11.586	27.2757
chr1	171078656	171079734	1079	171079502	128	28.5796	15.1554	28.3964
chr1	171092876	171094253	1378	171093537	45	17.9375	5.00063	7.49736
chr1	171092876	171094253	1378	171093537	45	17.9375	5.00063	4.62336
chr1	171176163	171177059	897	171176599	90	35.485	12.078	12.6878
chr1	171198841	171200225	1385	171199619	132	49.306	23.6394	23.0564
chr1	171815659	171816188	530	171816005	35	14.038	7.27365	4.03704
chr1	171961667	171962668	1002	171962126	94	37.0448	12.078	16.7249
chr1	172051774	172052532	759	172052115	35	14.038	7.27365	5.88427
chr1	172442453	172442972	520	172442852	34	13.6481	6.81905	4.61376
chr1	172474171	172474611	441	172474357	44	17.5475	5.3719	16.2865
chr1	172549424	172550328	905	172549925	52	20.6671	8.27886	9.06275
chr1	172623335	172624179	845	172623705	74	23.8881	10.065	10.9577
chr1	172701125	172701797	673	172701643	61	24.1766	8.63746	12.6878
chr1	172868286	172868957	672	172868748	40	13.0588	6.89365	7.49736
chr1	173081008	173081461	454	173081225	37	14.8179	5.90984	10.9577
chr1	173945294	173945677	384	173945494	45	8.71333	7.05062	7.9858
chr1	174222180	174223147	968	174222725	82	32.3655	8.06202	8.07408
chr1	174423425	174425296	1872	174424200	148	58.1018	26.367	27.1058
chr1	175455609	175456564	956	175456074	45	14.3451	7.72825	8.65079
chr1	175492749	175493392	644	175493181	43	17.1576	8.63746	4.62336
chr1	175546770	175547882	1113	175547348	142	55.7622	26.367	38.0635
chr1	175783818	175784702	885	175784272	59	19.1105	6.81905	8.84774
chr1	175884194	175884932	739	175884400	35	13.346	8.18286	5.04366
chr1	175902316	175902961	646	175902544	57	22.6168	6.97167	8.65079
chr1	175924959	175926085	1127	175925491	107	42.1141	16.8203	15.4825
chr1	176127799	176128446	648	176128081	47	18.7174	7.72825	9.80423
chr1	176914357	176915403	1047	176914948	91	35.8749	5.70765	9.22752
chr1	176946377	176947747	1371	176946781	75	19.5591	11.8197	10.381
chr1	177176213	177177311	1099	177176629	86	33.9252	6.81905	11.5344
chr1	177301626	177302234	609	177302014	70	27.6861	10.9105	14.2547
chr1	177326954	177328183	1230	177327555	124	32.4436	15.7015	20.7619
chr1	177544424	177545694	1271	177545054	93	29.9398	11.8197	17.7216
chr1	177959823	177960843	1021	177960533	53	21.057	9.09206	8.52084
chr1	178482184	178482952	769	178482654	92	29.002	11.8197	11.9434
chr1	178549166	178552544	3379	178550366	149	58.4918	17.7944	33.4248
chr1	178549166	178552544	3379	178550366	149	58.4918	17.7944	7.44809
chr1	178549166	178552544	3379	178550366	149	58.4918	6.08263	33.4248
chr1	178549166	178552544	3379	178550366	149	58.4918	6.08263	7.44809
chr1	178915179	178915925	747	178915548	70	22.6141	11.7001	13.0295
chr1	178971433	178972635	1203	178972064	38	14.4581	6.84423	9.02362
chr1	179212082	179213014	933	179212657	58	23.0068	7.24683	8.65079
chr1	179420868	179421500	633	179421295	42	16.7676	5.00063	5.7672
chr1	179424652	179425754	1103	179425233	130	51.0828	14.5473	25.3757
chr1	179944054	179945426	1373	179944756	115	44.1141	15.4565	22.6569
chr1	180162270	180163135	866	180162697	90	33.7356	9.78959	17.2039
chr1	180261631	180262299	669	180261862	53	17.7811	5.03616	4.61376
chr1	180598222	180599627	1406	180598925	139	51.901	19.5479	25.6518
chr1	180680039	180680851	813	180680337	69	22.2956	9.45222	13.2645
chr1	180793088	180794213	1126	180793820	84	29.6458	11.751	6.88524
chr1	180913655	180914742	1088	180914188	137	30.223	26.1061	35.7566
chr1	180968519	180969683	1165	180969143	148	49.0627	19.5002	28.0178
chr1	181388213	181389581	1369	181388889	108	35.8915	20.2548	24.2096
chr1	181648844	181649836	993	181649597	38	13.6022	5.00063	5.7672
chr1	181802452	181803280	829	181802889	60	23.7867	6.89823	8.24606
chr1	182020818	182021871	1054	182021243	75	19.7257	9.66244	7.14519
chr1	182139273	182140048	776	182139716	47	17.7946	9.43537	9.7719
chr1	182321961	182322432	472	182322198	44	17.5475	6.82632	6.92064
chr1	182377523	182378013	491	182377878	48	15.6069	8.5329	10.762
chr1	182472094	182472948	855	182472499	50	18.4426	6.71488	14.4105
chr1	182545209	182546106	898	182545732	63	23.7262	6.03902	4.40524
chr1	182590963	182592295	1333	182591358	96	21.2437	14.4937	16.6792
chr1	182665424	182666567	1144	182665816	101	38.2956	9.06509	15.2007
chr1	182963899	182964818	920	182964280	74	27.8041	6.56825	9.22902
chr1	183045050	183045706	657	183045491	41	13.3773	6.44163	7.49736
chr1	183165662	183166408	747	183166015	86	22.5807	6.30148	16.1482
chr1	183612191	183612834	644	183612510	38	15.2079	5.70765	8.65079
chr1	183941828	183942296	469	183942062	46	18.3274	4.31894	6.24076
chr1	184005590	184006394	805	184005966	52	20.6671	8.18286	9.22902
chr1	184683448	184685293	1846	184684650	158	62.0013	25.0032	32.2963
chr1	184763929	184764664	736	184764346	65	25.2625	10.6661	7.86466
chr1	184837643	184838424	782	184838014	59	19.1105	5.79551	11.4669
chr1	184911275	184912130	856	184911677	53	21.057	6.75159	6.34392
chr1	185209384	185211457	2074	185210043	189	66.267	33.0133	41.5238
chr1	185398556	185399421	866	185399058	70	27.6861	5.18273	14.418
chr1	185482556	185483203	648	185483012	56	21.1311	9.54667	6.24076
chr1	185496716	185498347	1632	185497762	104	27.2526	11.751	19.0317
chr1	185587887	185588693	807	185588332	81	26.1177	9.07329	15.8598
chr1	185748033	185748672	640	185748442	39	15.5978	4.83122	8.68614
chr1	185785717	185786886	1170	185786214	100	26.2144	15.4565	22.4921
chr1	185877767	185878854	1088	185878349	145	56.932	25.4578	24.5771
chr1	186083734	186084573	840	186084093	51	19.2775	6.36444	10.381
chr1	186360731	186361560	830	186361135	56	22.2269	8.18286	10.5076
chr1	186378859	186380700	1842	186379565	147	57.7119	12.7994	13.2716
chr1	186439004	186440136	1133	186439716	118	30.8863	15.9111	22.4921
chr1	186460865	186461302	438	186461076	14	5.84918	6.81905	4.61376
chr1	186472028	186472785	758	186472388	69	27.2962	7.72735	8.82641
chr1	186584888	186585812	925	186585399	66	17.3897	10.0013	15.5714
chr1	186635895	186636769	875	186636307	48	7.30722	8.5329	6.77591
chr1	186652072	186652532	461	186652307	32	12.8682	6.81905	7.49736
chr1	186678968	186679744	777	186679371	96	30.8953	16.3657	9.12399
chr1	187175796	187176747	952	187176068	70	27.6861	12.4807	14.418
chr1	187390775	187391584	810	187391140	76	28.5455	11.8197	19.6085
chr1	187520859	187521771	913	187521228	92	36.2649	6.36444	10.381
chr1	187570910	187571811	902	187571311	117	37.584	18.6387	16.1526
chr1	187699011	187700207	1197	187699861	55	21.8369	8.63746	13.0292
chr1	187977409	187978097	689	187977676	51	20.2771	13.1835	9.33928
chr1	188019544	188020191	648	188019768	35	14.038	8.63746	5.50655
chr1	188121308	188122461	1154	188122047	84	25.1746	10.0013	12.7801
chr1	188300790	188301120	331	188301012	51	16.5624	5.54638	9.80423
chr1	188762298	188763438	1141	188762661	68	21.9771	12.2743	16.7249
chr1	189150880	189151885	1006	189151479	91	35.8749	7.72825	8.07408
chr1	189375593	189377753	2161	189376558	224	58.3984	32.7314	41.5238
chr1	189386317	189387287	971	189386643	65	25.7364	6.84423	14.418
chr1	189593188	189593719	532	189593302	41	16.3777	5.18273	6.92064
chr1	189838647	189839079	433	189838831	31	8.30555	6.65293	13.2645
chr1	189862673	189863513	841	189863089	99	29.6172	18.0042	18.5453
chr1	189908509	189909217	709	189908886	61	13.5785	6.36444	8.65079
chr1	190048717	190049628	912	190049228	83	32.7554	11.4153	14.2547
chr1	190061507	190062123	617	190061921	36	14.428	5.90984	7.4279
chr1	190242695	190242935	241	190242815	14	5.84918	4.83122	6.34392
chr1	190538922	190539836	915	190539379	92	34.4771	10.2381	13.2716
chr1	190723989	190724880	892	190724532	83	26.7547	8.11695	15.2934
chr1	191124061	191125954	1894	191124974	151	59.2717	25.4578	31.9502
chr1	191258594	191259429	836	191258985	72	15.9875	4.60687	14.418
chr1	191259762	191260147	386	191259966	16	6.62907	7.27365	9.22752
chr1	191875412	191875743	332	191875594	36	14.428	4.36467	7.86466
chr1	191902689	191904007	1319	191903271	104	36.4057	18.1116	10.5076
chr1	192150185	192151338	1154	192150826	120	47.1834	14.4034	19.6085
chr1	192259930	192260802	873	192260332	72	28.466	11.8197	10.381
chr1	192449642	192450459	818	192450042	73	27.4334	8.72934	11.6867
chr1	192681272	192682521	1250	192681886	92	36.2649	13.6381	18.455
chr1	193117683	193118214	532	193118106	67	17.5003	8.34995	10.1368
chr1	193161424	193162251	828	193161841	25	10.1386	4.87081	5.19048
chr1	193238255	193238936	682	193238622	45	11.9392	7.64943	9.80423
chr1	193259220	193259552	333	193259325	42	13.6959	7.72825	8.33958
chr1	193317173	193317694	522	193317282	41	15.6689	6.84423	5.04366
chr1	193462935	193463639	705	193463270	40	15.9878	10.9105	8.65079
chr1	194017716	194018454	739	194018024	44	17.5475	5.90984	8.07408
chr1	194337839	194338386	548	194338074	39	15.5978	9.54667	8.65079
chr1	194376792	194377618	827	194377232	69	27.2962	8.18286	9.22752
chr1	194587955	194588930	976	194588519	58	12.9214	7.38637	11.5344
chr1	195001340	195002279	940	195001665	54	17.518	5.90984	6.92064
chr10	3365408	3366601	1194	3365919	71	22.9326	9.54667	13.7632
chr10	3555245	3555737	493	3555481	62	24.5665	8.18286	10.9577
chr10	3761909	3762542	634	3762307	41	16.3777	6.81905	7.49736
chr10	3835024	3835515	492	3835239	55	12.2644	8.18286	12.1111
chr10	4152912	4153802	891	4153283	98	31.5323	13.1835	8.65079
chr10	4325128	4325974	847	4325532	56	12.4834	6.81905	12.1111
chr10	4730141	4730524	384	4730354	72	15.9875	4.37258	12.7084
chr10	5213943	5214795	853	5214345	80	31.5856	10.4559	12.1111
chr10	5224695	5224953	259	5224775	17	7.01901	5.23382	5.01226
chr10	5803485	5804387	903	5804037	72	28.466	10.0013	18.455
chr10	5815358	5815687	330	5815565	25	10.1386	8.18286	5.19048
chr10	5992639	5993293	655	5993043	50	19.8872	7.27365	8.65079
chr10	7300234	7301365	1132	7300848	150	58.8817	15.9111	26.5291
chr10	7587530	7588390	861	7588033	38	15.2079	6.81905	4.65505
chr10	7695836	7696596	761	7696251	58	23.0068	10.4559	6.92064
chr10	8238400	8239391	992	8239000	69	27.2962	9.54667	17.3016
chr10	8310751	8311330	580	8310910	42	16.7676	7.72825	8.40611
chr10	8621191	8622030	840	8621616	42	16.7676	6.84423	9.22752
chr10	9231951	9233138	1188	9232597	90	35.485	14.5473	23.6455
chr10	9798180	9799421	1242	9799011	146	57.3219	15.78	27.1058
chr10	10876447	10877129	683	10876757	35	9.34374	6.36444	10.381
chr10	11020680	11021511	832	11021146	83	32.7554	5.63642	10.9577
chr10	11289175	11290566	1392	11290042	94	37.0448	6.81905	11.5344
chr10	12837024	12838024	1001	12837402	36	12.9046	8.63746	10.9577
chr10	12869214	12870607	1394	12869913	106	34.0804	10.7438	19.6617
chr10	13278249	13279198	950	13278748	98	31.5323	11.3651	8.07408
chr10	13483037	13483855	819	13483386	104	40.9442	12.0868	15.5714
chr10	14002524	14003267	744	14002887	58	23.0068	7.27365	7.14519
chr10	14134685	14135697	1013	14135244	126	49.523	7.72211	13.8413
chr10	14399621	14399927	307	14399752	47	8.01004	5.00063	5.19048
chr10	14539724	14540623	900	14540158	77	30.4157	6.81905	12.6878
chr10	14756939	14757581	643	14757170	48	19.1073	8.18286	9.80423
chr10	14890842	14891351	510	14890967	47	15.8054	5.23382	6.34392
chr10	16593738	16594581	844	16594113	64	25.3464	5.03616	8.84774
chr10	16938462	16939214	753	16938946	53	21.057	6.64114	7.49736
chr10	18148722	18149428	707	18149065	51	20.2771	6.81905	5.46397
chr10	18172545	18173095	551	18172765	40	14.2997	6.81905	5.7672
chr10	18364506	18365298	793	18364933	67	23.7166	8.63746	10.9279
chr10	18367931	18368558	628	18368146	52	11.6074	5.54638	9.22752
chr10	18400971	18401780	810	18401339	34	12.9753	6.03902	8.65079
chr10	18596359	18596947	589	18596714	37	12.1033	5.85138	8.3562
chr10	18740117	18741491	1375	18740810	124	48.7431	13.4298	20.3277
chr10	19046425	19047335	911	19047058	76	30.0258	6.84423	12.1111
chr10	19793643	19795244	1602	19794385	144	37.6345	25.0032	34.6032
chr10	20170751	20171241	491	20170987	46	17.4239	4.58951	7.72329
chr10	20239228	20239777	550	20239642	42	9.41731	8.63746	8.14325
chr10	20790142	20791579	1438	20791044	103	40.5543	14.5473	23.6455
chr10	20875536	20875777	242	20875585	11	3.8221	3.74308	8.3562
chr10	21380666	21381808	1143	21381235	125	49.1331	15.496	21.7269
chr10	21557622	21558927	1306	21558265	87	32.6235	13.6381	13.0292
chr10	21619918	21620578	661	21620179	47	12.4583	7.16231	9.06275
chr10	21894459	21895200	742	21894885	52	20.6671	8.18286	8.65079
chr10	22181310	22182500	1191	22182134	94	28.8618	8.34995	14.2279
chr10	22202482	22202772	291	22202692	30	6.78923	5.70765	8.96353
chr10	22371636	22372575	940	22372059	121	46.3959	11.0795	20.7619
chr10	22456955	22457918	964	22457392	82	32.3655	9.09206	13.8413
chr10	22668421	22669175	755	22668755	53	21.057	7.27365	5.50655
chr10	23030508	23031422	915	23030900	73	23.5696	8.45463	13.2645
chr10	23183075	23183775	701	23183457	31	11.8631	6.81905	6.34392
chr10	23394559	23395495	937	23395018	65	25.7364	7.64943	12.1111
chr10	23826784	23827226	443	23826995	43	17.1576	7.27365	8.07408
chr10	24788574	24789650	1077	24789261	45	17.9375	5.85138	5.51348
chr10	25342450	25343555	1106	25342888	96	25.1762	13.0531	18.458
chr10	25436536	25437847	1312	25437163	100	32.1694	16.2038	20.7619
chr10	25490262	25492457	2196	25491216	194	32.5408	43.6419	59.9789
chr10	25739365	25740508	1144	25739992	73	19.2066	7.27365	12.6878
chr10	25947920	25948200	281	25948144	23	5.25618	6.36444	6.92064
chr10	26155879	26156612	734	26156311	45	17.9375	5.45524	6.92064
chr10	26300644	26301505	862	26301080	121	47.5733	11.3651	12.7801
chr10	27209460	27209942	483	27209691	49	19.4973	8.63746	7.49736
chr10	27379980	27381381	1402	27380769	136	43.6356	17.2749	32.2963
chr10	29224861	29225403	543	29225083	55	21.8369	7.27365	6.88158
chr10	29865384	29866209	826	29865818	88	34.7051	5.00063	10.9577
chr10	30288278	30289084	807	30288642	54	21.447	6.36444	12.6878
chr10	30554387	30554883	497	30554522	44	14.8176	7.64943	10.9457
chr10	31192921	31193517	597	31193338	51	16.5624	7.27365	9.22752
chr10	31321046	31321860	815	31321477	43	17.1576	8.63746	8.14325
chr10	31394813	31396477	1665	31395567	119	46.7934	10.9105	21.3386
chr10	32014966	32015905	940	32015490	115	45.2336	12.7289	21.9154
chr10	32210488	32211433	946	32210905	67	26.5163	4.02602	8.07408
chr10	32574353	32575153	801	32574768	83	32.7554	10.4559	13.2645
chr10	33799654	33800720	1067	33800368	74	29.2459	10.0013	9.83083
chr10	34181355	34182860	1506	34182377	123	48.3532	6.81905	6.34392
chr10	34181355	34182860	1506	34182377	123	48.3532	6.81905	14.9947
chr10	34247077	34248312	1236	34247733	93	36.6549	14.5473	14.418
chr10	35711069	35711874	806	35711411	76	24.5252	9.90233	10.7066
chr10	36450626	36451798	1173	36451257	97	38.2146	6.81905	9.22752
chr10	36553990	36554506	517	36554414	33	13.2581	5.90984	6.34392
chr10	36872139	36874066	1928	36873004	188	73.6996	33.6406	49.0212
chr10	37071335	37071830	496	37071681	40	13.0588	7.72825	7.49736
chr10	37086230	37087371	1142	37086643	77	30.4157	9.54667	8.65079
chr10	37090395	37091179	785	37090787	62	23.3555	9.54667	13.5331
chr10	37141041	37141983	943	37141463	51	20.2771	9.66244	9.33928
chr10	37663947	37664614	668	37664295	57	22.6168	9.09206	13.2645
chr10	39069827	39070573	747	39070170	46	14.9699	7.72825	11.5344
chr10	39159405	39159905	501	39159772	34	11.1478	8.18286	6.51806
chr10	39510451	39511186	736	39510886	68	25.7418	7.72211	9.8538
chr10	39925760	39926446	687	39926107	60	19.429	7.27365	8.07408
chr10	39939175	39939889	715	39939461	60	23.7867	10.8623	7.5655
chr10	39995819	39997339	1521	39996622	145	56.932	19.0641	25.0686
chr10	40042201	40043258	1058	40042702	84	33.1453	7.48616	18.2428
chr10	40163449	40164534	1086	40163896	84	27.0732	5.54638	14.9947
chr10	40301192	40302151	960	40301689	89	11.0672	9.40083	9.88875
chr10	40544590	40545066	477	40544820	33	13.2581	6.82632	7.49736
chr10	40575490	40576314	825	40575925	64	25.0424	7.05062	14.9947
chr10	40646118	40646474	357	40646349	12	5.06929	4.5164	7.01716
chr10	40690180	40691110	931	40690597	65	21.0216	6.81905	8.40611
chr10	40876599	40877329	731	40877048	69	18.1684	8.55201	12.1111
chr10	41032661	41033496	836	41033028	51	13.4965	8.18286	6.92064
chr10	41059321	41060210	890	41059767	66	21.3401	13.1835	10.762
chr10	41103550	41104418	869	41103999	87	28.0287	10.0013	12.1111
chr10	41152949	41154510	1562	41153683	134	35.039	18.8017	31.1429
chr10	41362644	41363619	976	41363187	94	24.6571	16.3657	15.7321
chr10	41646671	41647137	467	41646936	27	10.9185	5.90984	8.07408
chr10	41768290	41769803	1514	41769149	142	55.7622	15.8148	17.2004
chr10	41785071	41785350	280	41785177	22	7.32569	5.90984	3.93233
chr10	41990447	41991403	957	41990975	79	25.4807	7.057	15.7235
chr10	42078805	42079191	387	42078999	26	10.5285	6.36444	5.7672
chr10	42356311	42357048	738	42356629	82	26.4362	7.01009	10.9577
chr10	43035267	43035613	347	43035415	33	10.6029	9.54667	4.61376
chr10	43148514	43149502	989	43148886	66	26.1263	12.2743	10.9577
chr10	43201879	43202556	678	43202262	63	24.9565	8.18286	9.80423
chr10	43319743	43320488	746	43320017	47	18.7174	7.29915	6.23064
chr10	43517979	43518307	329	43518172	56	22.2269	10.3524	8.84774
chr10	43669037	43671291	2255	43669711	175	68.6304	22.1591	32.3635
chr10	43880490	43881042	553	43880745	46	18.3274	7.40927	10.3224
chr10	44458344	44458992	649	44458551	49	19.4973	7.24683	10.6195
chr10	45080303	45080570	268	45080481	32	9.30583	5.90984	5.79247
chr10	45107768	45108751	984	45108205	90	23.6189	9.09206	10.8139
chr10	45454948	45455634	687	45455242	62	24.5665	10.9105	8.65079
chr10	45717213	45718029	817	45717555	73	28.8559	8.18286	6.88158
chr10	46020452	46021293	842	46020853	73	28.8559	11.6754	15.2378
chr10	47138084	47138581	498	47138282	27	10.9185	7.64943	5.7672
chr10	47196576	47197802	1227	47197326	91	35.8749	6.81905	10.381
chr10	48389931	48391776	1846	48390697	182	71.36	20.0025	31.1429
chr10	48453293	48454050	758	48453442	49	19.4973	10.4559	7.49736
chr10	48672081	48672897	817	48672463	75	29.6358	5.90984	6.24076
chr10	49231430	49232077	648	49231753	34	11.1478	5.00063	5.19048
chr10	50253920	50254425	506	50254170	36	14.428	5.90984	6.92064
chr10	52308124	52309086	963	52308657	92	26.2255	9.54667	18.455
chr10	53203359	53205076	1718	53204473	123	48.3532	16.8203	21.3386
chr10	53516527	53517168	642	53516728	60	23.7867	6.44163	10.7066
chr10	53654495	53655186	692	53654803	68	17.9088	8.3936	12.2885
chr10	55190514	55192362	1849	55191165	120	38.5395	22.2755	28.5094
chr10	55773054	55774467	1414	55773673	123	32.184	12.2743	24.2222
chr10	56022836	56024258	1423	56023453	142	55.7622	15.4442	36.9101
chr10	56472036	56472970	935	56472528	76	30.0258	7.05062	14.9947
chr10	56591109	56591906	798	56591394	83	26.7547	17.7295	18.455
chr10	57731314	57732480	1167	57731836	102	40.1643	9.09206	14.418
chr10	58298755	58299344	590	58299180	29	11.1216	5.97303	8.07408
chr10	58456437	58457352	916	58456890	100	39.3845	4.8948	14.7462
chr10	58953747	58954125	379	58953941	38	15.2079	6.81905	9.7719
chr10	59266856	59267740	885	59267335	101	39.7744	11.3651	13.8413
chr10	59834509	59835921	1413	59834970	129	50.6929	15.0019	20.049
chr10	60130708	60131751	1044	60131236	79	24.9479	12.6334	10.1516
chr10	60157509	60157842	334	60157703	42	8.14507	6.48814	9.7719
chr10	60481550	60482218	669	60481795	48	12.7179	6.03902	7.9858
chr10	60484603	60485268	666	60484996	38	12.4218	4.70042	8.06986
chr10	60609559	60610099	541	60609668	52	16.8809	6.81905	9.62917
chr10	60690934	60691256	323	60691081	30	12.0883	7.59183	7.23795
chr10	61263174	61264195	1022	61263974	85	26.819	14.0927	5.16498
chr10	61263174	61264195	1022	61263974	85	26.819	14.0927	9.33928
chr10	61297566	61298160	595	61297788	52	20.6671	12.603	4.91541
chr10	61356317	61357173	857	61356759	91	34.3224	17.0002	17.6955
chr10	61629426	61629924	499	61629738	33	10.6029	5.70765	11.5344
chr10	61705832	61706514	683	61706129	52	18.5951	8.5329	6.76772
chr10	61860451	61861756	1306	61861121	108	35.8915	15.2989	14.7107
chr10	61973663	61974742	1080	61974142	96	33.8311	12.4807	20.5502
chr10	62061329	62062119	791	62061689	56	19.8801	7.27365	8.8963
chr10	62072965	62073528	564	62073354	15	5.09613	6.30148	5.59149
chr10	62149688	62150786	1099	62150056	64	14.2355	9.2238	12.1111
chr10	62263782	62264878	1097	62264413	105	41.3342	12.381	20.0867
chr10	63070521	63071546	1026	63071016	96	35.96	13.8625	14.4812
chr10	63081236	63082011	776	63081629	55	17.8365	9.45222	11.3284
chr10	63593265	63593706	442	63593409	25	6.74826	3.58559	6.65169
chr10	64012672	64013218	547	64012895	49	15.9254	8.18286	8.14325
chr10	64095420	64096146	727	64095823	56	22.2269	9.09206	7.60037
chr10	64458052	64459511	1460	64458709	135	53.0325	8.85723	24.2222
chr10	66438417	66439028	612	66438633	55	21.8369	7.27365	6.92064
chr10	66503923	66504873	951	66504374	71	22.9326	8.18286	9.83083
chr10	66510631	66513007	2377	66511902	342	89.0251	39.0656	72.3194
chr10	66548551	66549372	822	66548966	45	17.0532	6.37913	9.80423
chr10	66551479	66552244	766	66551911	47	18.7174	7.20169	4.03704
chr10	66796611	66797550	940	66797108	81	26.1177	9.81283	5.53956
chr10	66821139	66821711	573	66821343	55	21.8369	4.42862	6.88158
chr10	66979462	66980240	779	66979810	57	18.4735	7.24683	9.83083
chr10	67264796	67265596	801	67265177	71	22.9326	8.27886	6.77591
chr10	67798468	67799960	1493	67799180	122	31.9245	21.3664	26.5432
chr10	67856837	67858177	1341	67857231	90	35.485	13.7655	17.6955
chr10	67984491	67985604	1114	67985025	132	42.3616	12.0033	22.0905
chr10	68249504	68250596	1093	68250092	106	34.0804	8.63788	16.1482
chr10	68338030	68339020	991	68338690	74	29.2459	5.00063	8.07408
chr10	68355811	68356577	767	68356189	68	26.9062	6.36444	8.65079
chr10	68375332	68376235	904	68375771	28	7.15096	8.43998	11.0866
chr10	68389719	68391058	1340	68390282	54	17.518	10.7438	19.6085
chr10	68394021	68394897	877	68394475	113	44.4537	10.9105	19.0317
chr10	68524223	68526074	1852	68524874	153	55.6893	22.9483	40.9471
chr10	69086500	69087050	551	69086871	32	12.8682	9.54667	5.7672
chr10	69272398	69273178	781	69272764	78	25.1622	17.3119	17.8783
chr10	69325190	69326885	1696	69326050	150	57.0561	29.0946	31.7196
chr10	69542864	69544059	1196	69543503	109	28.5503	8.18286	17.3016
chr10	69601491	69602415	925	69601945	72	28.466	7.27365	12.4613
chr10	69807398	69808929	1532	69808247	150	47.0892	22.7302	31.1429
chr10	69843992	69844676	685	69844272	42	11.1606	8.45463	8.07408
chr10	70058336	70059108	773	70058803	74	23.8881	10.4559	16.1482
chr10	70165816	70167272	1457	70166771	132	51.8627	20.4571	25.5625
chr10	70637390	70638478	1089	70637959	108	34.7174	14.0927	11.3482
chr10	71148870	71150425	1556	71149600	142	55.7622	18.9223	30.5868
chr10	71166038	71167273	1236	71166673	130	51.0828	15.0019	23.5294
chr10	71392545	71393682	1138	71393198	136	42.7234	19.2747	29.3974
chr10	71416628	71417149	522	71416848	47	15.2884	10.0013	6.30458
chr10	71662988	71664447	1460	71663858	154	60.4415	15.4442	19.4565
chr10	71824083	71824398	316	71824227	41	16.3777	6.03902	9.80423
chr10	72049232	72050234	1003	72049722	79	31.1956	11.8197	16.1482
chr10	72655960	72656328	369	72656177	53	14.0156	8.63746	9.52329
chr10	72710421	72711767	1347	72711298	156	37.1585	26.1956	20.8548
chr10	73504056	73504982	927	73504591	75	29.6358	9.25984	14.418
chr10	74079002	74079678	677	74079439	54	17.518	6.81905	6.92064
chr10	74142053	74142385	333	74142174	26	10.5285	7.72825	8.65079
chr10	74160108	74160853	746	74160543	90	35.485	10.065	13.2716
chr10	74688218	74689278	1061	74688812	90	35.485	7.72825	11.5344
chr10	75244327	75245353	1027	75244867	104	40.7194	15.4565	19.6617
chr10	75321299	75322195	897	75321737	48	19.1073	4.03679	4.77991
chr10	75455066	75455609	544	75455394	61	24.1766	6.84423	4.91541
chr10	76051068	76051981	914	76051588	44	17.5475	6.03902	6.60786
chr10	76466091	76466404	314	76466211	32	8.1373	6.33365	6.74233
chr10	76826457	76827729	1273	76826887	127	32.9417	9.45222	14.6634
chr10	76918438	76919438	1001	76919092	59	15.5729	9.09206	7.92991
chr10	77328773	77329203	431	77328975	46	13.9201	8.45463	5.36916
chr10	77579908	77580442	535	77580106	49	19.4973	9.45222	6.51708
chr10	77649226	77651337	2112	77650092	191	61.1536	22.8146	29.0012
chr10	77842819	77843642	824	77843179	47	15.2884	8.63746	7.49736
chr10	78168976	78170513	1538	78169627	126	41.8185	14.3792	21.3702
chr10	78217126	78217977	852	78217551	77	24.8437	11.4153	8.47227
chr10	78422659	78424153	1495	78423469	121	45.228	12.7501	21.9895
chr10	78500678	78501308	631	78501074	62	24.5665	7.72825	8.65079
chr10	78738001	78739194	1194	78738515	80	25.7992	16.1041	25.9524
chr10	79107668	79108318	651	79107945	48	19.1073	8.18286	5.7672
chr10	79599394	79599655	262	79599563	25	8.28122	7.29915	6.88158
chr10	79912357	79913275	919	79912987	73	23.5696	10.7023	13.0342
chr10	79925696	79927672	1977	79926599	140	30.88	17.3119	28.1461
chr10	79963725	79964442	718	79964131	38	11.7877	4.03476	6.1115
chr10	79994565	79995136	572	79994785	42	14.909	7.72211	10.5935
chr10	80123486	80124332	847	80123882	84	18.6156	7.30904	13.0361
chr10	80135389	80137069	1681	80136132	111	42.3197	10.3654	22.6109
chr10	80258332	80259367	1036	80258824	56	14.7943	8.3936	9.44984
chr10	80451298	80452044	747	80451741	68	25.1058	12.3638	10.6695
chr10	80635633	80636258	626	80636044	53	11.8264	8.05785	7.14933
chr10	80944684	80945668	985	80945190	89	34.0069	9.40083	8.07627
chr10	81051412	81052735	1324	81052087	114	25.1858	13.966	23.2117
chr10	81074473	81075776	1304	81075146	111	31.5834	12.4225	13.4498
chr10	81082993	81083832	840	81083505	64	20.2702	8.50009	8.08162
chr10	81290958	81291741	784	81291352	38	12.6999	5.85007	7.41548
chr10	81295404	81296210	807	81295754	59	18.8105	6.02187	10.102
chr10	81353578	81355190	1613	81354616	119	37.4219	16.1157	16.8122
chr10	81605740	81606609	870	81606138	61	19.7475	6.64114	8.25622
chr10	82872737	82873499	763	82873139	54	17.518	6.78892	8.3791
chr10	82976089	82977081	993	82976712	73	19.2066	5.3719	8.49633
chr10	82988543	82989393	851	82988970	84	33.1453	9.90233	14.9947
chr10	83101999	83102640	642	83102206	36	13.6309	4.25004	8.14325
chr10	83989979	83991038	1060	83990653	59	23.3967	5.45524	6.34392
chr10	84023312	84024141	830	84023728	69	22.2956	11.3651	11.8949
chr10	84169207	84169831	625	84169603	55	21.8369	6.36444	6.34392
chr10	84676283	84677374	1092	84676741	51	20.2771	7.05062	12.1111
chr10	84901319	84902019	701	84901679	36	13.7167	7.90036	6.92064
chr10	85150633	85151523	891	85151139	48	19.1073	7.24683	7.49736
chr10	85302545	85303197	653	85302835	33	13.2581	6.81905	6.92064
chr10	85338361	85339211	851	85338794	98	36.7014	11.2728	16.2209
chr10	85377223	85378081	859	85377539	40	15.9878	6.71488	6.92064
chr10	85446570	85447472	903	85446936	58	19.4275	10.0013	14.727
chr10	85665357	85666211	855	85665814	54	21.447	5.18273	7.49736
chr10	86126436	86127711	1276	86126863	83	29.297	10.8025	18.455
chr10	86188047	86189133	1087	86188588	106	34.0804	14.8535	10.1106
chr10	86287768	86288549	782	86288171	58	23.0068	10.0013	10.381
chr10	86301484	86302379	896	86301937	41	10.901	6.04339	8.45965
chr10	86413850	86415396	1547	86414708	130	41.7246	19.7275	28.836
chr10	86708877	86709909	1033	86709372	56	21.8176	7.67961	11.9405
chr10	86864977	86865495	519	86865138	45	8.71333	10.2395	7.49736
chr10	86870411	86871068	658	86870831	55	21.8369	8.02262	17.1413
chr10	87201687	87202353	667	87202043	33	13.2581	5.90984	8.07408
chr10	87251621	87252279	659	87252049	47	18.7174	8.18286	8.84774
chr10	87264285	87265233	949	87264744	68	26.9062	6.36444	5.7672
chr10	87304955	87305573	619	87305150	89	35.0951	8.63746	9.80423
chr10	87392838	87393603	766	87393160	68	26.9062	11.3651	9.7719
chr10	87587310	87588782	1473	87588555	65	17.1302	9.54667	8.84774
chr10	88220791	88221176	386	88221001	53	21.057	7.24683	10.9577
chr10	88240610	88241212	603	88241041	71	21.3244	9.09206	6.92064
chr10	88322104	88322926	823	88322526	86	32.2528	11.8197	12.5503
chr10	88747178	88747836	659	88747601	84	31.5113	6.38904	15.2007
chr10	89065075	89067500	2426	89066734	166	53.1909	18.9223	27.6825
chr10	89218747	89219745	999	89219195	69	27.2962	5.00063	8.65079
chr10	89467457	89468416	960	89467913	61	24.1766	8.85485	8.07627
chr10	90047169	90048121	953	90047657	68	26.9062	9.45222	17.8783
chr10	90789035	90789740	706	90789298	64	25.3464	9.09206	12.6878
chr10	90991214	90991738	525	90991528	34	12.2071	6.36444	7.60037
chr10	91177085	91177375	291	91177315	41	9.19831	6.27219	6.74898
chr10	91440308	91441481	1174	91440934	118	46.4035	20.0025	25.3757
chr10	91479487	91480665	1179	91480171	131	51.4728	14.5473	20.1852
chr10	91573811	91574658	848	91574257	56	22.2269	5.23382	10.3148
chr10	91660739	91661650	912	91661282	57	22.6168	4.54603	7.49736
chr10	91729938	91730275	338	91730107	42	16.7676	6.36444	5.40695
chr10	91920990	91922005	1016	91921455	71	18.6875	8.63746	16.2209
chr10	92328559	92329415	857	92328979	63	24.9565	14.5473	10.9577
chr10	92409393	92410520	1128	92410076	61	24.1766	10.4559	9.33928
chr10	92582035	92582736	702	92582446	74	29.2459	15.4565	15.5714
chr10	92771304	92772152	849	92771728	69	27.2962	9.09206	11.5344
chr10	93264529	93265327	799	93264917	52	20.6671	7.05062	6.72488
chr10	93305261	93306706	1446	93306113	151	39.4513	18.932	24.5771
chr10	93375865	93376590	726	93376233	45	17.9375	5.67712	5.40695
chr10	93380222	93381355	1134	93380697	140	44.9097	19.0933	26.5291
chr10	93547765	93548834	1070	93548391	81	26.1177	6.33444	19.6617
chr10	93564222	93564905	684	93564558	62	24.5665	7.05062	8.82641
chr10	93606318	93606829	512	93606696	41	16.3777	7.72825	6.39004
chr10	93669584	93670489	906	93670008	90	35.485	13.5032	16.7249
chr10	94390947	94391345	399	94391142	46	12.1988	4.70042	6.5692
chr10	94688492	94689097	606	94688716	47	16.7411	9.24168	12.1111
chr10	94866586	94867429	844	94866973	59	18.711	7.64943	5.7672
chr10	95111379	95111844	466	95111641	48	15.2806	6.89365	6.05157
chr10	95503420	95504292	873	95503851	44	14.3329	3.35744	10.381
chr10	96292276	96292938	663	96292790	31	12.4782	3.16722	7.49736
chr10	96512503	96513306	804	96512823	65	25.7364	5.00063	9.80423
chr10	96645703	96646846	1144	96646147	72	28.466	10.9105	17.8783
chr10	96675017	96676480	1464	96675968	36	11.7848	8.18286	5.8985
chr10	96746873	96747364	492	96747043	54	21.447	10.4559	6.34392
chr10	97372723	97373495	773	97373078	50	19.8872	9.27282	14.418
chr10	97393851	97394666	816	97394316	35	13.346	6.81905	4.61376
chr10	97409799	97410341	543	97409964	67	26.5163	5.90984	8.07408
chr10	97722458	97723052	595	97722800	42	16.7676	5.45524	9.22752
chr10	97799093	97799709	617	97799307	36	14.428	5.90984	4.42387
chr10	97895175	97895943	769	97895530	111	43.6739	13.1835	22.4921
chr10	97939553	97940753	1201	97940177	83	32.7554	8.85723	12.2885
chr10	98233357	98234095	739	98233785	63	24.9565	5.90984	7.49736
chr10	98372557	98372894	338	98372770	34	13.6481	6.44163	5.7672
chr10	98975807	98976623	817	98976240	64	16.8707	6.75159	7.86466
chr10	99019364	99020191	828	99019718	52	16.8809	10.4559	6.34392
chr10	99243502	99244581	1080	99244031	89	28.6658	9.59275	12.1111
chr10	99369760	99370491	732	99370151	59	13.1404	9.09206	4.77234
chr10	99602800	99603346	547	99603189	49	19.4973	6.81905	10.9577
chr10	100324750	100325888	1139	100325448	57	22.6168	7.72825	13.2645
chr10	100335385	100336077	693	100335674	35	14.038	4.42862	8.33958
chr10	100340715	100341263	549	100340833	59	23.3967	13.6381	13.8413
chr10	100345828	100346381	554	100345979	56	22.2269	13.2858	12.2885
chr10	100350948	100351542	595	100351114	62	24.5665	16.3657	15.5714
chr10	100356122	100356613	492	100356215	16	6.30226	5.90984	3.36244
chr10	100361201	100361748	548	100361339	56	22.2269	8.63746	16.7124
chr10	100366207	100366905	699	100366508	44	14.3329	5.45524	8.07408
chr10	100371744	100372517	774	100372150	72	18.947	7.46431	13.4498
chr10	100382107	100382639	533	100382390	27	10.9185	5.45524	8.07408
chr10	100396671	100397418	748	100397092	51	20.2771	5.00063	8.65079
chr10	100747781	100748789	1009	100748319	83	32.7554	10.4676	18.455
chr10	100849612	100851195	1584	100850229	181	70.97	15.0019	25.9524
chr10	101042847	101044199	1353	101043406	86	27.7102	8.85723	16.1482
chr10	101941568	101942397	830	101942012	66	21.3401	5.45524	7.49736
chr10	102457858	102458507	650	102458272	39	15.5978	8.05203	7.49736
chr10	102547884	102549199	1316	102548590	120	47.1834	19.5479	23.6455
chr10	102908346	102909370	1025	102908742	67	26.5163	5.04072	8.3791
chr10	104114433	104115186	754	104114813	57	22.6168	5.45524	8.07408
chr10	104143797	104144731	935	104144311	70	18.4279	8.05785	18.6919
chr10	104152380	104153455	1076	104152827	62	24.5665	10.4559	21.7153
chr10	104160697	104161803	1107	104161332	64	25.3464	12.2743	5.19048
chr10	104160697	104161803	1107	104161332	64	25.3464	12.2743	22.4921
chr10	104169313	104170277	965	104169846	67	26.5163	9.40083	13.8701
chr10	104178080	104178823	744	104178362	70	21.0282	9.65919	19.0317
chr10	104186342	104187299	958	104186863	78	30.8057	7.76686	6.23064
chr10	104186342	104187299	958	104186863	78	30.8057	7.76686	21.6278
chr10	104194887	104196042	1156	104195374	53	17.5845	8.72934	20.1668
chr10	104196996	104197794	799	104197499	134	22.5282	10.9407	8.78022
chr10	104213590	104215364	1775	104214648	156	50.0058	22.5457	36.9161
chr10	104673605	104674272	668	104673853	46	18.3274	6.44163	4.61376
chr10	105055020	105056439	1420	105055776	111	43.6739	15.9111	20.1852
chr10	105198193	105199051	859	105198652	60	23.7867	7.27365	12.1111
chr10	105216735	105217939	1205	105217482	107	42.1141	9.09206	13.2645
chr10	105838155	105838921	767	105838573	52	19.6482	6.36444	8.07408
chr10	106170540	106171519	980	106171112	103	40.5543	7.057	15.5714
chr10	106346038	106346755	718	106346394	53	20.019	5.45524	10.9577
chr10	107293978	107294701	724	107294403	47	18.7174	6.36444	7.49736
chr10	107772035	107773252	1218	107772547	111	43.6739	20.9118	21.9154
chr10	107857371	107858385	1015	107857828	86	33.9252	10.8702	16.1482
chr10	107933904	107934717	814	107934251	67	26.5163	6.81905	16.4262
chr10	108048694	108049192	499	108048994	31	12.4782	6.36444	12.1111
chr10	108258218	108258982	765	108258625	59	23.3967	9.09206	14.418
chr10	108581155	108582208	1054	108581718	54	21.447	14.0927	10.3224
chr10	109256954	109257889	936	109257453	82	32.3655	7.72825	11.5344
chr10	109299898	109300215	318	109300006	24	6.48871	7.72825	6.34392
chr10	110033609	110034649	1041	110034178	83	32.7554	10.0013	10.0873
chr10	110234390	110235447	1058	110234839	121	47.5733	14.5473	23.6455
chr10	110495443	110496975	1533	110496177	133	52.2527	12.7289	17.3016
chr10	110728379	110729737	1359	110729019	164	64.341	17.7145	32.2963
chr10	110740743	110741372	630	110741118	41	16.3777	5.90984	7.49736
chr10	111032500	111033972	1473	111033006	167	65.5108	28.64	33.4248
chr10	111081529	111082520	992	111081972	72	28.466	7.64943	12.2885
chr10	111196424	111197200	777	111196767	45	11.9392	5.27161	6.39004
chr10	111362992	111363652	661	111363411	47	17.7946	8.18286	7.49736
chr10	111419269	111419968	700	111419575	64	25.3464	5.90984	7.37312
chr10	111565270	111565820	551	111565583	66	14.6735	9.09206	7.37312
chr10	111648286	111649159	874	111648796	47	18.7174	8.63746	6.34392
chr10	111817052	111817806	755	111817466	58	15.3133	9.54667	10.9577
chr10	112041132	112042497	1366	112041926	129	41.4061	18.6387	27.1058
chr10	112089517	112090515	999	112089958	74	23.8881	8.47293	7.9858
chr10	112360140	112361193	1054	112360719	63	24.9565	5.90984	9.22752
chr10	112377623	112378905	1283	112378249	154	33.9461	22.7302	32.873
chr10	112892665	112893489	825	112893091	76	19.9852	10.9105	7.34207
chr10	113153770	113154685	916	113154213	58	23.0068	8.63746	12.1111
chr10	114265415	114266197	783	114265776	129	42.8064	6.36444	17.8783
chr10	114490989	114492070	1082	114491416	52	20.6671	6.08263	12.6878
chr10	114981299	114982913	1615	114981878	156	50.0058	17.7295	18.4934
chr10	115309658	115310287	630	115309876	59	23.3967	5.54479	13.0292
chr10	115886350	115887228	879	115886819	55	21.8369	7.27365	12.6878
chr10	116238295	116239525	1231	116239062	40	10.6415	5.45524	4.61376
chr10	116423390	116423838	449	116423530	50	16.7933	6.67814	4.61376
chr10	116592005	116592925	921	116592454	93	24.3975	11.751	19.6085
chr10	116715674	116716361	688	116715987	46	18.3274	3.69318	4.91541
chr10	117167694	117168895	1202	117168267	69	22.2956	10.9105	15.5714
chr10	117421360	117422127	768	117421733	70	27.6861	7.38637	19.6085
chr10	117553128	117553625	498	117553277	34	13.6481	4.83122	7.49736
chr10	117583522	117584393	872	117583952	81	31.9755	12.3727	15.5714
chr10	117617412	117618084	673	117617743	52	19.6482	5.90984	6.34392
chr10	117846570	117847414	845	117847032	104	34.5744	5.70765	12.1889
chr10	117952059	117952611	553	117952294	56	22.2269	4.53664	9.44984
chr10	118096312	118097747	1436	118096948	172	55.102	30.4584	46.7143
chr10	118110608	118111443	836	118110960	69	27.2962	5.23382	9.22902
chr10	118160552	118161325	774	118160731	36	11.7848	5.90984	4.03704
chr10	118187658	118188306	649	118187872	43	11.4201	8.63746	5.40695
chr10	118201478	118202183	706	118201886	53	21.057	6.36444	8.07408
chr10	118227058	118227508	451	118227284	34	13.6481	5.70765	8.65079
chr10	118271952	118272357	406	118272184	33	13.2581	9.54667	5.19048
chr10	118828930	118829474	545	118829329	55	21.8369	6.81905	8.84774
chr10	119003732	119005022	1291	119004378	131	43.4649	22.1855	28.836
chr10	119459477	119460456	980	119460027	87	28.0287	10.9105	14.418
chr10	119761314	119762074	761	119761738	64	20.7031	5.54479	10.762
chr10	119839342	119840129	788	119839751	55	21.8369	8.63746	5.19048
chr10	120020039	120021860	1822	120021136	274	87.5898	41.8235	53.578
chr10	120159469	120160497	1029	120159967	94	30.2583	8.72934	10.2789
chr10	120230534	120231253	720	120230954	69	13.2594	9.09206	12.644
chr10	120248099	120249979	1881	120248723	151	48.4133	30.0038	33.4497
chr10	120380533	120381162	630	120380942	28	11.0285	4.36467	5.19048
chr10	120398891	120399669	779	120399286	73	28.8559	8.45463	13.2716
chr10	120761766	120762413	648	120762177	48	19.1073	6.39967	7.49736
chr10	121101718	121102760	1043	121102351	88	29.3059	5.70765	9.22752
chr10	121329884	121330713	830	121330278	52	20.6671	5.90984	9.80423
chr10	121340715	121341837	1123	121341222	97	38.2146	14.5473	19.6617
chr10	121756744	121757355	612	121757174	44	17.5475	7.72825	5.87365
chr10	121937892	121938457	566	121938280	62	24.5665	6.30148	17.8783
chr10	121947494	121948867	1374	121948063	111	43.6739	15.4565	27.0709
chr10	122752400	122753343	944	122752915	73	28.8559	9.50167	17.3016
chr10	123362649	123364079	1431	123363542	164	64.341	14.5473	28.836
chr10	123362649	123364079	1431	123363542	164	64.341	4.69309	28.836
chr10	123405042	123405416	375	123405228	63	24.9565	9.54667	11.5344
chr10	123686457	123687248	792	123686910	78	27.5531	9.54667	8.65079
chr10	124615518	124616398	881	124616027	106	41.7241	11.3651	14.418
chr10	125067680	125068391	712	125068069	61	24.1766	7.27365	3.67103
chr10	125581949	125584263	2315	125582722	219	85.7879	27.2762	40.3704
chr10	125604503	125604996	494	125604849	41	16.3777	8.18286	6.34392
chr10	125635804	125636284	481	125636024	32	3.73078	5.89992	14.3377
chr10	125866111	125866858	748	125866438	54	17.518	6.03902	10.9577
chr10	125980044	125981399	1356	125980687	212	83.0583	18.1841	24.2222
chr10	126566947	126567813	867	126567131	33	8.82465	4.42862	6.34392
chr10	126643947	126644840	894	126644404	63	14.0165	6.36444	12.1111
chr10	126707719	126709267	1549	126708460	152	59.6616	18.1171	21.3386
chr10	127230456	127231312	857	127230836	76	24.5252	10.0723	18.1562
chr10	127419886	127420472	587	127420299	49	19.0147	7.27365	9.24672
chr10	127538506	127539391	886	127538998	68	26.9062	7.34098	15.1155
chr10	127554777	127555582	806	127555145	65	25.7364	10.5432	15.3281
chr10	127569498	127570232	735	127569854	78	13.1832	14.0793	11.4275
chr10	127591972	127592850	879	127592413	60	23.7867	8.85723	10.7877
chr10	127605601	127606460	860	127606042	62	24.5665	10.4559	12.1889
chr10	127639672	127641048	1377	127640376	100	32.1694	12.7583	15.2378
chr10	128513196	128514440	1245	128513704	83	29.297	11.9556	16.2865
chr10	128607514	128608494	981	128607938	72	15.9875	9.54667	12.6878
chr10	128707359	128708196	838	128707817	113	37.5379	9.57736	22.8324
chr10	128828999	128830209	1211	128829598	135	44.782	15.0019	23.6455
chr10	128918875	128920065	1191	128919472	32	10.5108	8.45463	6.69576
chr10	128920971	128921864	894	128921384	94	30.2583	8.05203	13.7632
chr10	130301916	130302537	622	130302345	53	21.057	7.72825	6.39004
chr11	3126881	3127365	485	3127154	109	4.48321	2.85855	3.55452
chr11	3159807	3160048	242	3159886	33	6.44029	6.98756	6.38562
chr11	3288378	3289216	839	3288736	56	18.155	7.01009	8.65079
chr11	3507307	3507966	660	3507633	60	23.7867	7.27365	13.2716
chr11	3680808	3681286	479	3681080	40	8.9793	6.70774	6.92064
chr11	3691621	3692391	771	3691934	54	21.447	8.45463	8.33958
chr11	4043943	4044880	938	4044432	68	26.5835	8.11372	17.3016
chr11	4175858	4176674	817	4176255	62	24.4317	10.8702	15.2378
chr11	4187436	4187883	448	4187676	49	12.8679	5.54479	4.25708
chr11	4767308	4768101	794	4767678	65	19.5473	10.0218	11.4961
chr11	4866043	4867481	1439	4866933	96	37.1282	20.4571	19.0466
chr11	4896266	4897308	1043	4896781	76	29.8609	8.5329	8.40611
chr11	5141706	5142592	887	5142212	58	22.2934	9.73221	14.4759
chr11	5143335	5144671	1337	5143815	133	41.7878	17.4587	34.9665
chr11	5494788	5495088	301	5494911	32	8.5651	6.82632	9.10221
chr11	5581127	5582060	934	5581530	80	30.0284	11.6754	17.3016
chr11	5915064	5915768	705	5915457	67	25.2091	9.38619	11.797
chr11	5915064	5915768	705	5915457	67	25.2091	9.38619	4.34307
chr11	5975671	5976363	693	5976029	48	15.2806	4.70042	8.6887
chr11	6218297	6219064	768	6218734	83	22.6055	12.7583	15.7293
chr11	6306014	6306821	808	6306435	79	31.1956	7.64943	6.72488
chr11	6694105	6695683	1579	6694960	55	21.8369	4.31894	10.3224
chr11	6694105	6695683	1579	6694960	55	21.8369	5.23382	10.3224
chr11	6714611	6715451	841	6715078	79	31.1956	12.1529	11.797
chr11	6897464	6898316	853	6897882	58	23.0068	6.04339	7.9858
chr11	7020626	7021482	857	7021085	97	36.3307	6.36444	10.381
chr11	7070433	7071588	1156	7071028	106	41.7241	18.1171	22.6569
chr11	7707948	7708510	563	7708303	46	18.3274	11.8197	8.07408
chr11	8133225	8134022	798	8133644	48	19.1073	5.90984	9.22752
chr11	8486409	8486931	523	8486706	52	20.6671	5.18273	9.22752
chr11	8509829	8510422	594	8510024	41	16.3777	8.63746	8.65079
chr11	8977623	8978300	678	8977890	46	14.9699	5.85138	9.22752
chr11	9067476	9068030	555	9067851	53	21.057	10.4559	14.418
chr11	9134229	9134719	491	9134435	27	10.9185	5.75858	7.49736
chr11	9172441	9173092	652	9172869	70	27.6861	9.66244	12.6092
chr11	10521963	10522916	954	10522437	70	27.6861	7.72825	13.2645
chr11	11011394	11012121	728	11011725	48	15.6069	7.27365	7.49736
chr11	11436709	11438141	1433	11437522	158	62.0013	17.7944	31.9502
chr11	11708757	11709748	992	11709315	87	34.3152	7.24683	13.5941
chr11	11758334	11759534	1201	11759079	127	49.913	15.7015	23.2233
chr11	11806421	11807386	966	11806954	100	39.3845	9.2238	13.5721
chr11	11810622	11811545	924	11811075	55	21.8369	7.38637	10.762
chr11	12215624	12216457	834	12216026	70	27.6861	5.45524	12.1111
chr11	12496159	12497196	1038	12496564	89	35.0951	8.45463	13.8413
chr11	14694412	14695803	1392	14695121	147	38.4132	14.5473	19.6085
chr11	15376417	15376720	304	15376561	29	9.55525	6.36444	6.34392
chr11	15388336	15389315	980	15388827	77	28.9163	8.05203	11.5344
chr11	16398218	16399124	907	16398616	105	41.3342	9.66244	16.7249
chr11	16507840	16508741	902	16508262	64	24.0969	7.25296	16.1482
chr11	17369371	17370115	745	17369765	71	28.076	6.81905	9.22752
chr11	17421887	17422467	581	17422102	42	16.7676	9.54667	8.65079
chr11	17723034	17724101	1068	17723600	108	35.8915	14.0927	15.5714
chr11	18030659	18031560	902	18031123	71	28.076	7.72825	13.2645
chr11	18089941	18090722	782	18090298	83	32.7554	6.36444	13.2645
chr11	18140427	18141184	758	18140741	82	32.3655	8.18286	16.7249
chr11	18143698	18144965	1268	18144429	85	33.5353	12.7289	25.3757
chr11	18951147	18952229	1083	18951633	103	40.5543	6.37913	15.5714
chr11	18988887	18989695	809	18989216	66	17.3897	3.35744	11.5344
chr11	19124133	19124833	701	19124432	44	14.3329	7.24683	6.34392
chr11	19381671	19382570	900	19382113	60	15.8324	6.36444	13.2645
chr11	19416698	19417429	732	19416998	61	24.1766	9.09206	12.6878
chr11	19531037	19531691	655	19531457	38	15.2079	9.54667	4.42387
chr11	19839338	19840234	897	19839807	46	18.3274	6.30089	10.9577
chr11	19927741	19929366	1626	19928674	124	48.7431	18.5787	29.8113
chr11	20239623	20240334	712	20240013	48	12.7179	6.08263	6.97496
chr11	20361563	20363030	1468	20362470	82	31.3619	12.7289	18.455
chr11	20426396	20427601	1206	20427070	127	49.913	22.2755	24.799
chr11	20467661	20468677	1017	20468121	91	35.8749	15.9111	12.2885
chr11	20594055	20594883	829	20594445	63	20.3845	8.05203	10.9577
chr11	20672007	20672932	926	20672352	36	9.60329	6.04651	14.9947
chr11	20738998	20740140	1143	20739635	127	33.2222	12.2743	19.0317
chr11	21226035	21226747	713	21226318	67	21.2058	10.9105	12.6878
chr11	21638727	21639914	1188	21639143	66	24.8383	9.25984	15.5714
chr11	21902064	21903101	1038	21902615	86	33.9252	7.24683	16.1482
chr11	22362209	22362909	701	22362469	66	26.1263	10.0013	5.46397
chr11	22779403	22780407	1005	22779804	63	23.7262	11.6754	12.7801
chr11	23073018	23074164	1147	23073489	93	36.6549	14.5473	21.3386
chr11	23171215	23172343	1129	23171625	48	15.6069	7.6518	8.65079
chr11	23689793	23690626	834	23690198	63	20.3845	10.065	13.2645
chr11	23889019	23889359	341	23889144	43	17.1576	6.84423	10.9577
chr11	23903362	23904393	1032	23903924	54	21.447	7.27365	10.8139
chr11	24003100	24003822	723	24003499	51	16.5624	5.63642	6.72488
chr11	24124806	24125498	693	24125019	51	17.1225	5.90984	8.65079
chr11	24226542	24227048	507	24226673	27	10.9185	5.70765	11.5344
chr11	24739784	24740409	626	24740186	55	17.8365	7.27365	9.80423
chr11	24759267	24760713	1447	24759798	124	48.7431	13.6381	16.2209
chr11	25217057	25217877	821	25217512	60	23.7867	6.44163	8.65079
chr11	25528394	25529640	1247	25528959	146	57.3219	25.9124	15.5259
chr11	26132214	26133297	1084	26132745	101	32.4879	7.64943	16.7249
chr11	26271419	26272217	799	26271808	87	34.3152	7.72825	7.81835
chr11	26295988	26297360	1373	26296513	125	32.7031	20.0025	23.0688
chr11	27148770	27149887	1118	27149315	120	47.1834	17.2749	23.0688
chr11	27191062	27193010	1949	27192289	128	50.3029	22.2755	25.0187
chr11	28210266	28211159	894	28210678	57	22.6168	6.30148	12.6878
chr11	28247493	28248305	813	28247918	57	22.6168	6.81905	8.07408
chr11	28312147	28312789	643	28312352	44	17.5475	7.72825	5.7672
chr11	29141440	29142898	1459	29142026	69	22.2956	8.45463	13.2645
chr11	29228963	29229760	798	29229366	57	21.5018	8.63746	7.5655
chr11	29243433	29244552	1120	29244023	107	39.7875	10.7438	16.4262
chr11	29502743	29505307	2565	29503724	184	72.1398	19.0933	25.9524
chr11	29742133	29743888	1756	29742852	144	46.1837	9.54667	21.9154
chr11	29782256	29782616	361	29782462	27	10.9185	5.45524	10.3224
chr11	29798896	29799704	809	29799299	82	26.4362	7.72825	15.7293
chr11	29930265	29931158	894	29930584	50	19.8872	6.03902	12.1111
chr11	30175551	30177331	1781	30176589	186	48.5356	37.0393	32.6722
chr11	30598370	30599798	1429	30599179	116	36.4864	15.0019	21.3386
chr11	31469305	31470159	855	31469688	90	28.9843	14.0927	16.2865
chr11	31672414	31673284	871	31672807	73	28.5098	5.90984	7.05749
chr11	31754748	31755532	785	31755030	57	22.6168	9.54667	9.24672
chr11	32186668	32187408	741	32186998	77	30.4157	12.2743	11.5344
chr11	32205005	32205930	926	32205401	118	30.8863	9.32532	14.2904
chr11	32652162	32653820	1659	32652918	170	66.6806	14.9723	31.7196
chr11	32688665	32689276	612	32689034	75	29.6358	8.18286	10.762
chr11	32790456	32791171	716	32790660	53	21.057	6.50007	12.6878
chr11	32816208	32816971	764	32816417	51	20.2771	7.72825	17.8783
chr11	32834784	32835397	614	32835188	57	12.7024	8.45463	12.4613
chr11	32886171	32886459	289	32886278	34	13.6481	6.36444	6.34392
chr11	33076551	33077272	722	33076924	40	14.2997	6.81905	8.79579
chr11	33095325	33096122	798	33095739	65	25.7364	7.27365	6.88158
chr11	33119546	33120022	477	33119926	33	10.8293	8.18286	6.34392
chr11	33345776	33346638	863	33346244	84	18.6156	7.64943	8.65079
chr11	33525262	33526675	1414	33525895	92	36.2649	7.72825	10.9577
chr11	33536712	33538070	1359	33537414	129	50.6929	12.7501	19.6085
chr11	33751320	33751770	451	33751552	30	8.046	6.03902	4.69101
chr11	33835614	33836512	899	33836070	88	34.7051	14.5473	19.6085
chr11	33935971	33937062	1092	33936518	139	54.5923	21.3664	13.8355
chr11	33955841	33956815	975	33956322	83	26.7547	13.7655	21.9154
chr11	34127571	34128523	953	34128107	101	39.7744	10.4559	9.80423
chr11	34352604	34354618	2015	34353820	184	72.1398	32.7314	40.3493
chr11	34361956	34362750	795	34362321	48	19.1073	5.90984	7.37312
chr11	34539215	34540299	1085	34539728	96	37.8247	18.1841	21.3386
chr11	34809717	34810611	895	34810142	62	24.5665	7.72825	10.381
chr11	35127427	35128474	1048	35128091	81	31.9755	6.37913	14.9947
chr11	35241374	35242049	676	35241681	74	29.2459	8.18286	9.62917
chr11	35756675	35757423	749	35757242	37	8.32228	5.63642	12.6878
chr11	35997889	35999031	1143	35998521	117	46.0135	19.199	25.0686
chr11	36072680	36073361	682	36073160	51	9.84985	9.25984	7.91359
chr11	36361220	36361770	551	36361581	44	13.3277	5.00063	8.65079
chr11	36381674	36382865	1192	36382401	110	43.2839	11.8197	19.6085
chr11	36533133	36533884	752	36533507	78	24.6361	12.2743	18.455
chr11	36605531	36606557	1027	36606155	81	26.1177	9.06509	13.2716
chr11	37007697	37008876	1180	37008268	130	51.0828	14.0927	25.9524
chr11	37450034	37450792	759	37450463	51	20.2771	5.45524	9.22752
chr11	37475641	37477921	2281	37477183	209	81.8885	18.1841	35.7566
chr11	38143185	38143907	723	38143484	57	18.4735	8.18286	12.6878
chr11	38422688	38423938	1251	38423169	136	53.4225	16.3657	28.836
chr11	38549018	38550144	1127	38549708	75	29.6358	6.36444	12.1111
chr11	38571165	38572381	1217	38571847	81	26.1177	6.36444	12.1111
chr11	39688921	39689977	1057	39689333	105	41.3342	8.18286	12.1889
chr11	39953789	39955045	1257	39954338	117	37.584	8.18286	16.1482
chr11	40183025	40184240	1216	40183655	124	48.7431	15.2989	23.0688
chr11	40506328	40507135	808	40506729	69	13.2594	8.05203	13.2645
chr11	40531289	40532121	833	40531663	60	23.7867	6.81905	9.80423
chr11	40691043	40691888	846	40691456	93	36.6549	14.8535	13.5828
chr11	42099933	42100765	833	42100371	80	25.7992	5.45524	9.80423
chr11	42273683	42274587	905	42274157	89	35.0951	9.09206	12.6092
chr11	42328207	42329231	1025	42328685	76	24.5252	6.36444	10.9577
chr11	42594319	42595637	1319	42595024	109	42.894	6.62237	21.9154
chr11	42894499	42895894	1396	42895286	154	60.4415	16.3657	28.2593
chr11	42939796	42940867	1072	42940320	117	46.0135	8.45463	14.418
chr11	43506839	43508017	1179	43507494	90	28.9843	11.8197	15.5714
chr11	43549514	43550349	836	43549930	68	25.2618	7.72211	12.2885
chr11	43916975	43917946	972	43917534	80	31.5856	9.09206	9.22752
chr11	44496637	44497569	933	44497121	98	21.6817	12.2743	18.455
chr11	44513420	44514093	674	44513862	81	21.283	8.18286	10.9577
chr11	44837799	44838711	913	44838369	71	28.076	7.64943	11.5344
chr11	44843531	44845089	1559	44844244	183	71.7499	23.1663	34.4079
chr11	45064853	45065685	833	45065311	59	23.3967	7.27365	10.8577
chr11	45121125	45122256	1132	45121678	109	42.894	13.6381	16.1482
chr11	45474043	45475384	1342	45474606	100	39.3845	13.1835	16.7249
chr11	45777849	45779585	1737	45778770	165	64.7309	20.9118	30.5661
chr11	45803123	45804099	977	45803543	50	17.7875	4.54603	10.762
chr11	45873810	45874720	911	45874240	86	19.0536	10.4559	19.6085
chr11	45940779	45941468	690	45940967	25	10.1386	5.02278	8.25622
chr11	46322215	46323052	838	46322644	59	19.1105	3.27647	9.22752
chr11	46787328	46788260	933	46787831	93	36.6549	6.84423	11.5344
chr11	47372282	47373373	1092	47372821	64	20.7031	7.25296	12.1111
chr11	47480281	47481476	1196	47480893	104	33.4434	8.45463	13.8413
chr11	47565669	47566556	888	47566102	70	27.6861	8.85723	12.1111
chr11	48291661	48292519	859	48292133	72	28.466	6.81905	16.1482
chr11	49176787	49177372	586	49177185	46	18.3274	7.27365	5.7672
chr11	49491685	49493254	1570	49492187	130	41.7246	14.0793	18.455
chr11	49752320	49752890	571	49752676	37	14.8179	4.83122	6.34392
chr11	49823947	49824740	794	49824404	64	20.7031	9.90233	9.66702
chr11	49896811	49898127	1317	49897415	121	47.5733	12.8833	27.1058
chr11	50234634	50235539	906	50235135	67	21.6586	4.03379	12.1111
chr11	50404495	50406183	1689	50405298	133	50.3098	12.3057	24.5771
chr11	50404495	50406183	1689	50405298	133	50.3098	12.3057	6.48764
chr11	50442194	50443474	1281	50442907	150	28.6024	15.78	25.5602
chr11	50480015	50480655	641	50480262	44	14.3329	7.92753	7.72329
chr11	50689887	50690228	342	50690006	49	16.464	7.24683	11.5344
chr11	50785562	50786887	1326	50786283	117	38.855	18.5197	25.5602
chr11	51199326	51200324	999	51199787	108	42.504	16.8203	26.0554
chr11	51540936	51541352	417	51541120	40	15.1996	7.72825	8.06986
chr11	51580249	51581035	787	51580542	65	24.9384	8.4859	23.4551
chr11	51650987	51651668	682	51651245	54	14.2752	4.93952	11.4006
chr11	51773383	51774632	1250	51774051	139	44.5912	16.1041	25.6386
chr11	51791947	51792770	824	51792350	55	21.8369	7.41382	14.2333
chr11	51819926	51821213	1288	51820464	157	57.1358	28.2601	31.5229
chr11	51887653	51889035	1383	51888247	118	43.84	11.2292	23.9763
chr11	52242287	52242791	505	52242462	34	13.6481	10.065	6.92064
chr11	52577099	52577534	436	52577373	33	11.1955	4.31894	3.91028
chr11	52584054	52584763	710	52584288	56	22.2269	7.72825	13.8413
chr11	52667173	52667926	754	52667593	41	10.901	12.2743	7.96444
chr11	52703788	52705028	1241	52704256	103	40.5543	11.3416	32.2963
chr11	52895068	52895403	336	52895285	35	14.038	6.81905	5.7672
chr11	53018176	53019118	943	53018631	73	28.8559	8.06202	10.381
chr11	53249800	53250692	893	53250240	54	21.447	8.06202	8.07627
chr11	53669211	53670067	857	53669619	76	24.5252	7.25296	8.84774
chr11	53697757	53698738	982	53698205	80	31.5856	6.81905	14.2547
chr11	54094761	54095689	929	54095176	77	30.4157	10.065	15.5714
chr11	54787066	54787867	802	54787484	95	33.4823	10.0751	11.0131
chr11	55146009	55147047	1039	55146439	55	21.8369	8.50009	8.40611
chr11	55173826	55174065	240	55173872	13	3.63368	4.50106	8.3562
chr11	55259937	55260827	891	55260360	69	25.0063	6.43039	13.8413
chr11	55521473	55522468	996	55521987	111	43.6739	11.8197	17.8783
chr11	55795617	55796438	822	55796013	64	25.3464	5.85138	10.381
chr11	56746895	56747410	516	56747167	49	19.4973	7.72825	5.7672
chr11	56794754	56795721	968	56795148	74	29.2459	7.27365	13.2645
chr11	57075789	57076798	1010	57076217	60	19.429	6.36444	12.1111
chr11	57082474	57083584	1111	57083030	121	47.5733	20.4571	23.0688
chr11	57172934	57173449	516	57173230	29	11.6983	5.63642	6.92064
chr11	57194069	57194873	805	57194515	53	21.057	6.81905	8.07408
chr11	57286841	57288001	1161	57287594	82	21.5425	10.0013	14.418
chr11	57296326	57297093	768	57296705	62	24.5665	9.09206	13.8413
chr11	57301016	57301548	533	57301295	33	13.2581	6.36444	10.381
chr11	57466602	57467322	721	57466910	61	16.092	9.40083	11.9434
chr11	57499444	57500681	1238	57500234	72	28.466	11.8197	10.9279
chr11	57620069	57621050	982	57620607	46	18.3274	9.2238	6.19128
chr11	57634646	57635833	1188	57635201	147	57.7119	24.094	24.5771
chr11	58262680	58263448	769	58263034	48	18.1654	8.18286	7.49736
chr11	58722655	58723171	517	58722811	39	12.7403	6.75159	5.7672
chr11	59028610	59029363	754	59028935	64	20.7031	8.5404	11.1022
chr11	59298801	59299476	676	59299190	75	24.2066	8.45463	9.88875
chr11	59938387	59941338	2952	59940496	213	40.5359	40.7474	44.5524
chr11	60112638	60113735	1098	60113236	121	26.7189	24.3305	22.8688
chr11	60169688	60170508	821	60170035	40	15.9878	5.18273	13.2716
chr11	60283252	60284569	1318	60283659	111	31.5834	13.3818	11.7308
chr11	60469718	60470705	988	60470283	67	17.6493	13.8015	15.5894
chr11	60722470	60723095	626	60722889	50	13.1252	6.00166	6.97496
chr11	60834252	60834785	534	60834606	26	8.89055	6.81905	8.07408
chr11	60871482	60872287	806	60871913	63	23.2866	7.64943	11.4481
chr11	61050680	61051463	784	61051131	56	21.1311	8.63746	9.80423
chr11	61749020	61750398	1379	61749561	127	40.7691	16.8203	25.9524
chr11	62051128	62051957	830	62051511	75	29.6358	9.40083	18.3644
chr11	62106525	62107358	834	62106952	66	26.1263	8.05203	8.14325
chr11	62167959	62169142	1184	62168655	131	51.4728	15.4565	16.3919
chr11	62338789	62339333	545	62339196	39	12.7403	3.45515	10.381
chr11	62835504	62836460	957	62836002	76	30.0258	12.3984	10.381
chr11	63153258	63153991	734	63153738	46	17.7592	6.04339	6.88664
chr11	64092054	64092918	865	64092468	62	24.5665	5.90984	10.381
chr11	64126809	64127715	907	64127288	84	27.0732	10.4559	13.8413
chr11	64442545	64443350	806	64442954	60	23.7867	11.3651	7.9858
chr11	64502585	64503449	865	64503003	53	21.057	8.18286	10.381
chr11	65157494	65158592	1099	65158161	93	36.2152	16.5752	14.2904
chr11	65173497	65174388	892	65173972	83	21.8021	12.7289	13.9342
chr11	65372046	65372952	907	65372673	54	12.0454	6.81905	5.40695
chr11	65582136	65583185	1050	65582693	79	31.1956	6.81905	9.22752
chr11	65864385	65865316	932	65864778	46	18.3274	5.00063	7.49736
chr11	65949011	65950039	1029	65949536	41	16.3777	4.78868	6.30458
chr11	66399241	66399772	532	66399432	46	18.3274	9.54667	8.65079
chr11	66399928	66400456	529	66400137	47	18.7174	6.36444	11.5344
chr11	66415672	66416656	985	66416196	68	26.9062	15.0019	16.7249
chr11	66669451	66670315	865	66669791	102	40.1643	16.3657	12.2885
chr11	66821963	66822425	463	66822165	33	10.8293	5.11974	5.7672
chr11	67007077	67007410	334	67007227	40	10.6415	7.67961	6.29284
chr11	67193923	67194658	736	67194184	50	16.2439	5.45524	7.49736
chr11	67258182	67258877	696	67258452	51	20.2771	4.83122	4.53137
chr11	67661023	67662336	1314	67661598	118	30.8863	11.8051	16.3919
chr11	67837763	67838639	877	67838186	63	24.9565	5.23382	12.1111
chr11	67880416	67881550	1135	67880805	70	20.0216	10.4559	16.1482
chr11	67985216	67986529	1314	67985755	80	30.0284	8.63788	20.7619
chr11	68084905	68085544	640	68085133	46	18.3274	4.8948	5.04366
chr11	68506650	68507326	677	68507067	53	17.7811	6.48814	13.2645
chr11	69027667	69028364	698	69027945	41	13.3773	6.71488	7.81835
chr11	69049065	69050470	1406	69049825	145	52.7964	28.2317	37.651
chr11	69117703	69118246	544	69118015	55	14.5347	5.3719	5.46397
chr11	69437538	69438167	630	69437769	49	17.2346	7.38637	8.98484
chr11	69480791	69481465	675	69481187	58	20.4566	8.05785	9.33928
chr11	69612925	69613725	801	69613309	90	35.485	10.6672	8.61454
chr11	69919347	69920633	1287	69919828	114	35.8627	13.4298	19.0894
chr11	70487034	70487823	790	70487424	45	8.71333	5.90984	5.19048
chr11	70667634	70668433	800	70668080	78	24.6361	9.1001	13.2716
chr11	70725698	70726480	783	70726095	53	17.1994	8.45463	6.30458
chr11	70945320	70946364	1045	70945775	157	61.6113	15.9111	25.9524
chr11	71365416	71366557	1142	71366108	84	27.0732	16.8203	11.0131
chr11	71580716	71581516	801	71581146	61	24.1766	8.05785	5.88427
chr11	72010820	72011474	655	72011148	57	22.6168	5.29275	11.4006
chr11	72068054	72068628	575	72068425	45	11.9392	8.45463	6.72488
chr11	72317312	72317809	498	72317534	24	7.96271	7.38637	4.61376
chr11	72557980	72558762	783	72558360	37	9.86284	4.87505	8.68614
chr11	72597659	72598493	835	72598078	61	19.7475	11.8197	9.83083
chr11	72614988	72615861	874	72615519	74	29.2459	13.6381	8.65079
chr11	72725543	72725898	356	72725681	31	11.8631	5.90984	6.23064
chr11	72998903	72999707	805	72999257	61	24.1766	11.0795	13.2645
chr11	73137596	73138537	942	73138072	62	18.6588	4.70609	9.05607
chr11	73260571	73261050	480	73260783	30	8.046	5.67712	6.72488
chr11	73296939	73297441	503	73297032	45	13.6239	6.36444	6.30458
chr11	74381674	74383528	1855	74382624	153	60.0516	23.5195	38.6402
chr11	74465174	74465577	404	74465344	38	15.2079	7.01009	8.07408
chr11	74604215	74604765	551	74604339	46	16.3924	5.45524	7.29713
chr11	75179616	75180663	1048	75180207	100	32.1694	16.1512	21.0166
chr11	75331531	75332390	860	75331988	54	21.447	7.38637	10.381
chr11	75643919	75644421	503	75644123	26	7.00781	4.69309	4.91541
chr11	75862450	75864765	2316	75863073	140	54.9823	25.3639	28.6673
chr11	75862450	75864765	2316	75863073	140	54.9823	25.3639	9.24672
chr11	75862450	75864765	2316	75863073	140	54.9823	7.41382	28.6673
chr11	75862450	75864765	2316	75863073	140	54.9823	7.41382	9.24672
chr11	76048228	76049537	1310	76048646	126	47.6817	18.7114	22.4126
chr11	76080694	76082199	1506	76081451	106	39.6672	15.1698	23.3842
chr11	76576429	76576702	274	76576476	21	6.20388	5.01518	6.92064
chr11	76612825	76613574	750	76613248	59	15.5729	9.54667	6.60786
chr11	76968696	76969800	1105	76969234	99	37.0721	12.1529	13.4498
chr11	76977573	76978125	553	76977932	36	13.3799	6.36444	6.09843
chr11	77128053	77128837	785	77128414	72	28.1245	10.065	13.8413
chr11	77391592	77392149	558	77391884	37	14.5451	5.00063	4.03704
chr11	77490748	77491475	728	77491164	78	26.0131	7.34098	11.9881
chr11	77791830	77792885	1056	77792208	82	26.4362	9.78959	13.7632
chr11	77797854	77799576	1723	77798667	147	38.4132	16.6999	24.5956
chr11	77878557	77878979	423	77878742	34	11.1478	7.29915	8.14325
chr11	78342765	78343761	997	78343235	64	16.8707	5.07663	7.9858
chr11	78774397	78775152	756	78774848	50	19.8872	13.6381	10.8577
chr11	78790739	78792194	1456	78791665	103	39.8075	16.8203	25.3757
chr11	79268701	79269340	640	79268872	69	27.2962	11.3651	13.5158
chr11	79332246	79333011	766	79332658	72	18.947	6.47654	10.5076
chr11	79378717	79379522	806	79379010	43	14.4883	8.18286	6.92064
chr11	80064382	80065520	1139	80064812	73	27.0924	9.54667	14.418
chr11	80371024	80371896	873	80371434	108	28.2908	10.9105	17.8783
chr11	80640699	80642140	1442	80641521	81	26.1177	8.63746	9.22752
chr11	80755302	80755848	547	80755636	54	21.447	4.70042	8.07408
chr11	80952240	80953157	918	80952709	76	30.0258	11.4153	13.5518
chr11	81125523	81126396	874	81126020	44	17.5475	8.63746	11.5344
chr11	81238691	81240645	1955	81239919	159	62.3912	26.0253	5.40695
chr11	81238691	81240645	1955	81239919	159	62.3912	26.0253	27.6825
chr11	81773726	81775059	1334	81774230	117	46.0135	14.5473	18.0731
chr11	82578854	82579452	599	82579003	31	12.2485	5.16533	5.71377
chr11	82884071	82885146	1076	82884449	77	24.3242	7.72825	10.4245
chr11	83334689	83335879	1191	83335242	121	38.858	14.1013	17.6955
chr11	83408852	83410143	1292	83409443	120	31.4054	12.4807	23.0688
chr11	83413626	83414378	753	83414080	56	21.8176	9.38619	14.418
chr11	83618700	83619602	903	83619086	71	18.6875	4.54603	8.65079
chr11	83734277	83736035	1759	83735112	151	59.2717	15.9111	33.4497
chr11	83944056	83945408	1353	83944389	84	33.1453	12.2743	8.44338
chr11	83944056	83945408	1353	83944389	84	33.1453	12.2743	9.22752
chr11	83944056	83945408	1353	83944389	84	33.1453	5.67712	8.44338
chr11	83944056	83945408	1353	83944389	84	33.1453	5.67712	9.22752
chr11	84010810	84011634	825	84011242	88	34.7051	11.6754	15.7293
chr11	84014717	84015612	896	84015100	88	32.9942	8.3936	17.8783
chr11	84193365	84194331	967	84193714	91	17.4266	15.9111	20.1852
chr11	84526598	84526931	334	84526774	39	12.7403	6.84423	6.59684
chr11	84855004	84856160	1157	84855572	111	43.6739	19.0933	15.5513
chr11	84877233	84878055	823	84877654	66	25.3163	9.84818	7.96444
chr11	84890383	84891611	1229	84890996	138	49.6555	19.6257	22.1614
chr11	85038280	85038928	649	85038483	59	23.3967	5.90984	14.418
chr11	85619176	85619764	589	85619410	47	18.7174	10.4559	8.65079
chr11	85750356	85751113	758	85750745	45	17.9375	5.27161	5.53956
chr11	86170176	86171302	1127	86170595	117	36.7982	14.5473	17.8783
chr11	86775010	86776223	1214	86775607	172	55.102	22.875	37.4868
chr11	86926240	86927229	990	86926643	61	21.624	10.4559	11.6376
chr11	86932532	86933939	1408	86932958	113	36.31	10.6534	13.2157
chr11	86971818	86972744	927	86972360	38	14.8315	5.63642	7.81835
chr11	87126842	87127350	509	87126938	46	13.2538	5.41507	7.34207
chr11	87417056	87417978	923	87417409	61	19.7475	11.3651	6.84299
chr11	87433516	87434395	880	87434001	71	25.4126	13.1835	10.4245
chr11	87678169	87679134	966	87678724	75	26.5068	8.12509	12.2885
chr11	88371385	88372422	1038	88372056	89	31.2049	12.0459	15.2007
chr11	88449085	88449733	649	88449491	50	19.8872	6.03902	6.72488
chr11	88599551	88600026	476	88599942	37	9.86284	5.23382	5.94701
chr11	88950516	88951140	625	88950956	58	11.1758	5.70765	8.07627
chr11	89143818	89144808	991	89144334	102	40.1643	14.4937	17.2325
chr11	89269492	89270486	995	89269992	111	43.6739	13.6381	17.8783
chr11	89424281	89424738	458	89424458	39	15.5978	6.84423	10.381
chr11	89891409	89892000	592	89891769	43	17.1576	5.45524	7.49736
chr11	90052340	90053985	1646	90053259	119	46.7934	17.2749	19.6085
chr11	90073242	90073794	553	90073577	68	26.9062	6.84423	9.24672
chr11	90295581	90297052	1472	90296200	111	43.6739	14.5473	15.5513
chr11	90306755	90307660	906	90307249	63	14.0165	9.54667	11.5282
chr11	90676637	90678235	1599	90677399	113	44.4537	17.2749	22.2582
chr11	90679679	90680224	546	90679907	42	16.7676	8.18286	5.8985
chr11	90759171	90760160	990	90759756	60	23.7867	14.0927	12.6878
chr11	91452803	91454469	1667	91453526	107	23.6528	12.7583	16.1482
chr11	91577050	91577578	529	91577165	45	11.9392	8.18286	8.6887
chr11	92018995	92020006	1012	92019509	94	37.0448	6.36444	16.1482
chr11	92176299	92177096	798	92176678	57	22.6168	11.3651	8.20599
chr11	92265779	92266561	783	92266123	78	25.1622	9.09206	10.381
chr11	92645955	92646235	281	92646128	20	6.68868	8.18286	4.61376
chr11	93208314	93209176	863	93208767	66	21.3401	6.44163	7.5655
chr11	93613216	93614068	853	93613608	70	27.6861	9.90233	11.5344
chr11	94189284	94190045	762	94189639	58	15.3133	7.25296	10.9577
chr11	94443043	94444104	1062	94443691	53	14.0156	9.09206	10.903
chr11	94766950	94768038	1089	94767412	92	36.2649	13.1835	15.2378
chr11	94908391	94908939	549	94908754	50	19.8872	7.38637	11.5344
chr11	95042318	95043681	1364	95043113	132	34.5199	14.0202	13.0295
chr11	95193281	95194005	725	95193669	44	14.8176	8.4859	7.92991
chr11	95785098	95786320	1223	95785508	118	30.8863	9.57736	16.7048
chr11	96071293	96072101	809	96071688	54	17.518	6.50682	8.96814
chr11	97018378	97019524	1147	97018961	138	44.2727	18.005	28.2746
chr11	97396445	97397020	576	97396840	47	10.5123	8.63788	8.52084
chr11	97449708	97452960	3253	97450826	152	56.7204	27.8185	21.0153
chr11	97449708	97452960	3253	97450826	152	56.7204	27.8185	10.2607
chr11	97449708	97452960	3253	97450826	152	56.7204	7.19823	21.0153
chr11	97449708	97452960	3253	97450826	152	56.7204	7.19823	10.2607
chr11	97456388	97457088	701	97456772	57	15.0538	7.77409	6.97496
chr11	97956273	97956574	302	97956461	34	6.62971	6.82601	5.50655
chr11	97984437	97985316	880	97984819	78	17.3016	6.04651	12.3412
chr11	98043307	98044427	1121	98043956	87	26.0631	8.63788	14.317
chr11	98528283	98528793	511	98528398	34	13.6481	5.90984	6.5146
chr11	98554949	98555734	786	98555320	49	10.9504	8.90419	5.88427
chr11	98580582	98581508	927	98581046	87	31.6283	12.7583	10.5076
chr11	98984525	98985055	531	98984725	45	14.6514	4.31894	5.51348
chr11	99060195	99061202	1008	99060610	42	16.7676	7.24683	9.7719
chr11	99674111	99675117	1007	99674522	67	21.6586	6.37913	8.07408
chr11	99939651	99940309	659	99939881	75	29.6358	13.1835	14.418
chr11	100111834	100113240	1407	100112492	137	53.8124	14.7727	28.5094
chr11	100791242	100791837	596	100791459	31	12.4782	7.74799	8.49633
chr11	101232055	101232753	699	101232269	33	13.2581	8.27886	5.40695
chr11	101267887	101268777	891	101268335	88	16.8584	13.3059	16.2865
chr11	102112933	102114984	2052	102113502	125	32.7031	20.9248	16.5196
chr11	102112933	102114984	2052	102113502	125	32.7031	20.9248	6.23064
chr11	102176334	102177216	883	102176793	93	24.3975	7.24683	12.1111
chr11	102262575	102263853	1279	102263053	101	35.1586	10.6534	14.4307
chr11	102368239	102370311	2073	102369250	156	50.0058	24.7275	26.0517
chr11	102403628	102404361	734	102403938	42	11.1606	5.94448	6.72488
chr11	102452805	102453668	864	102453252	55	20.7604	7.64943	12.3326
chr11	102558174	102558871	698	102558576	46	16.8924	8.55201	6.88158
chr11	102734811	102735539	729	102735349	43	14.4883	5.63642	6.88158
chr11	102795739	102797387	1649	102796538	129	41.4061	20.9118	23.4264
chr11	102904869	102905371	503	102905070	60	19.429	8.88645	11.7964
chr11	102991301	102991869	569	102991497	35	13.5161	4.71768	6.20374
chr11	103019046	103019429	384	103019270	40	12.7858	6.04651	4.40524
chr11	103042912	103044096	1185	103043550	93	34.6299	9.18808	20.5129
chr11	103114527	103115409	883	103114949	79	17.5206	12.5444	10.2789
chr11	103354189	103355323	1135	103354780	95	37.4347	12.4807	15.7293
chr11	103399815	103400765	951	103400378	56	18.7689	6.16586	10.3578
chr11	103402697	103405200	2504	103403502	171	56.6361	16.9093	30.6823
chr11	103635948	103637728	1781	103636916	208	56.2446	28.874	34.8853
chr11	104047806	104048907	1102	104048243	124	46.6336	11.6754	7.6165
chr11	104324859	104326144	1286	104325545	127	49.913	15.7015	20.1277
chr11	104629518	104630282	765	104630053	40	10.6415	4.31894	9.80423
chr11	105385768	105386452	685	105386188	45	14.3451	5.20006	6.75788
chr11	105548973	105549544	572	105549117	55	17.8365	5.45524	7.37312
chr11	105778506	105779178	673	105778931	45	17.9375	5.90984	4.53137
chr11	105968244	105969209	966	105968676	79	25.4807	10.0723	8.6887
chr11	106500743	106501351	609	106500979	71	22.4532	6.80497	8.33159
chr11	106632684	106633561	878	106633133	44	8.52391	5.29786	7.01716
chr11	107006603	107007382	780	107007011	40	13.0588	8.10625	8.90825
chr11	107198130	107200761	2632	107199625	147	47.1392	9.14778	15.5513
chr11	107198130	107200761	2632	107199625	147	47.1392	12.4225	15.5513
chr11	107503955	107505010	1056	107504399	99	31.1849	15.0019	22.4621
chr11	107740240	107741237	998	107740818	68	17.9088	9.06509	10.4245
chr11	107824256	107825072	817	107824662	46	14.9699	9.09206	10.381
chr11	107875927	107876649	723	107876186	51	18.1362	10.9105	9.65411
chr11	107984737	107985496	760	107985152	100	39.3845	6.93476	9.38202
chr11	108077349	108078315	967	108077814	77	30.4157	10.4559	15.5714
chr11	108123768	108124796	1029	108124321	116	45.6236	18.9223	18.455
chr11	108629177	108631139	1963	108630431	177	69.4102	18.6387	24.0855
chr11	108641726	108642849	1124	108642252	67	21.6586	9.66244	12.5094
chr11	108753740	108755623	1884	108754251	109	42.894	18.1171	19.1701
chr11	108775604	108776831	1228	108776165	69	22.2956	6.33444	10.5076
chr11	108892493	108893499	1007	108892963	123	40.8307	16.2203	20.1532
chr11	108998265	109000415	2151	108999189	201	78.7689	35.8315	46.7143
chr11	109047135	109047856	722	109047520	63	24.9565	7.6518	7.49736
chr11	109080770	109081484	715	109081214	81	17.9586	13.5032	13.8701
chr11	109085747	109086504	758	109086173	62	24.5665	6.81905	9.80423
chr11	109147701	109148822	1122	109148261	112	24.7478	14.7723	20.3912
chr11	109362993	109363774	782	109363360	59	19.1105	8.05785	9.10221
chr11	109798392	109799166	775	109798746	77	30.4157	9.54667	8.49633
chr11	110166840	110168411	1572	110167511	126	49.523	14.091	17.6955
chr11	110436949	110437789	841	110437437	54	21.447	11.3651	10.9279
chr11	110461747	110462409	663	110461983	44	11.6797	8.10625	10.1956
chr11	110569471	110571153	1683	110570092	134	47.0845	22.1431	36.3333
chr11	110657422	110657726	305	110657618	37	14.8179	8.45463	6.72488
chr11	110848021	110848850	830	110848408	60	23.7867	10.0013	8.07408
chr11	111052377	111053217	841	111052783	80	31.5856	7.48616	16.8294
chr11	111640592	111641768	1177	111641275	123	48.3532	6.36444	20.7619
chr11	111995065	111996022	958	111995574	90	35.485	13.6381	15.5714
chr11	112054189	112055576	1388	112054783	108	42.504	10.4559	19.6085
chr11	112079734	112080836	1103	112080229	86	33.9252	9.38619	5.7672
chr11	112079734	112080836	1103	112080229	86	33.9252	9.38619	9.38202
chr11	112352346	112353381	1036	112352867	117	46.0135	9.54667	9.80423
chr11	112380678	112381165	488	112380848	43	17.1576	6.36444	6.34392
chr11	112667023	112667740	718	112667342	50	19.8872	7.27365	8.3562
chr11	112771425	112772329	905	112771893	84	27.0732	12.1529	9.91179
chr11	112847213	112848367	1155	112847645	78	20.5043	11.3651	14.418
chr11	112922017	112922534	518	112922215	32	12.8682	8.18286	6.92064
chr11	113081001	113081733	733	113081311	52	18.485	10.9105	9.33928
chr11	113760202	113761100	899	113760642	63	20.3845	9.25984	14.727
chr11	113891485	113892281	797	113891954	73	23.5696	6.37913	10.8577
chr11	113926573	113927768	1196	113927094	114	44.8437	13.6884	25.3757
chr11	114061599	114062444	846	114062029	67	21.2058	9.42511	12.2885
chr11	114092559	114093301	743	114092943	30	12.0883	6.81905	5.0978
chr11	114234542	114235365	824	114234952	50	18.9068	10.0013	10.33
chr11	114530138	114531797	1660	114531021	195	42.9254	20.1755	42.6773
chr11	114539345	114539930	586	114539555	46	17.4239	7.27365	8.84774
chr11	114646690	114647505	816	114647024	34	11.1478	5.81938	7.51838
chr11	114896685	114897771	1087	114897314	83	32.7554	11.3651	13.2645
chr11	114999296	115000120	825	114999728	61	24.1766	6.84423	10.9279
chr11	115055086	115055962	877	115055579	47	15.2884	5.02278	8.07408
chr11	115197275	115198063	789	115197631	46	10.2933	6.84423	11.4006
chr11	115746323	115746838	516	115746520	76	25.3545	8.06202	12.3013
chr11	115871711	115872756	1046	115872160	57	20.2289	6.04339	13.2716
chr11	116506632	116506942	311	116506735	28	11.3084	4.42862	6.17708
chr11	116616239	116618718	2480	116616926	136	53.4225	17.6591	30.5972
chr11	116616239	116618718	2480	116616926	136	53.4225	17.6591	8.33958
chr11	116645944	116646640	697	116646231	60	19.429	6.04651	12.9715
chr11	116648692	116649590	899	116649180	59	16.1468	14.4551	13.0844
chr11	116937893	116938626	734	116938180	49	19.4973	10.065	15.7913
chr11	117177677	117178011	335	117177880	51	16.2162	9.38619	9.90325
chr11	117389732	117390550	819	117390116	92	34.4771	5.75858	11.0791
chr11	117404749	117405653	905	117405176	69	22.2956	6.62237	8.07627
chr11	117536265	117537022	758	117536612	53	18.6134	7.72825	11.6058
chr11	117615166	117615771	606	117615335	58	11.1758	9.09206	6.92064
chr11	117673961	117674930	970	117674472	99	28.1995	8.45463	9.33928
chr11	118165711	118166421	711	118166010	64	14.2355	9.79794	11.0694
chr11	118283851	118284849	999	118284253	71	25.7208	7.56856	9.81268
chr11	118503919	118504663	745	118504317	36	11.7848	6.65293	5.58606
chr11	118505658	118506497	840	118506102	44	14.0332	6.84423	10.2607
chr11	118566091	118566777	687	118566352	48	15.6069	5.67712	9.17141
chr11	118635904	118636656	753	118636225	60	23.7867	10.8702	16.0392
chr11	118703333	118703874	542	118703669	34	11.5248	6.81905	7.05749
chr11	118760160	118761196	1037	118760808	60	23.7867	7.05062	9.22902
chr11	118896018	118896878	861	118896467	57	22.6168	10.0013	14.2333
chr11	119053157	119053520	364	119053320	71	22.9326	5.70765	9.83083
chr11	119689456	119690518	1063	119689999	104	34.5744	9.40083	12.5857
chr11	119905708	119906834	1127	119906103	58	15.3133	4.70609	12.0294
chr11	119961334	119961872	539	119961549	61	16.092	8.68784	5.87365
chr11	120454526	120455337	812	120454931	41	15.6689	3.69318	5.13945
chr11	120765181	120765690	510	120765319	27	10.9185	6.82632	6.75788
chr11	121100633	121100920	288	121100764	24	9.26803	5.90984	6.17708
chr11	121209350	121210137	788	121209766	83	31.9447	8.18286	9.73146
chr11	121251199	121252117	919	121251542	69	22.2956	8.92581	10.5076
chr11	121262113	121263480	1368	121262716	139	44.5912	18.675	18.025
chr11	121434631	121435795	1165	121435354	87	34.3152	10.2381	12.1889
chr11	121440737	121442402	1666	121441488	187	61.9046	21.7682	39.2169
chr11	121462065	121463124	1060	121462569	139	44.5912	17.7295	24.8427
chr11	121470235	121470820	586	121470628	27	10.3802	5.23382	8.07627
chr11	121512907	121513484	578	121513317	32	7.22724	5.03616	6.29284
chr11	121534528	121535544	1017	121535030	100	39.3845	11.2728	16.6792
chr11	121766532	121766983	452	121766685	28	9.23674	5.40915	7.49736
chr11	121799559	121800458	900	121800063	69	26.2813	10.0456	16.7249
chr12	3260476	3261549	1074	3260978	105	41.3342	11.6754	17.6955
chr12	3372148	3372847	700	3372600	55	21.8369	5.45524	9.06275
chr12	3387822	3389117	1296	3388311	64	20.7031	7.27365	14.6579
chr12	3572791	3574077	1287	3573508	171	56.6361	18.8166	17.5963
chr12	4890612	4891688	1077	4891240	84	27.0732	14.0927	11.797
chr12	5176102	5176878	777	5176462	58	18.792	7.77409	16.2209
chr12	5413696	5414450	755	5414090	39	15.5978	7.72825	6.92064
chr12	5777521	5778064	544	5777704	39	10.3819	10.4676	7.49736
chr12	5944614	5945312	699	5944851	26	10.5285	6.81905	6.92064
chr12	7138912	7140016	1105	7139442	89	35.0951	14.0927	16.1482
chr12	7818549	7819516	968	7818984	92	24.138	7.67961	7.5655
chr12	7961181	7962165	985	7961745	80	25.7992	6.36444	8.07408
chr12	7973477	7974275	799	7973800	51	20.2771	8.63746	10.381
chr12	7999328	8000644	1317	8000107	93	36.6549	16.1041	18.455
chr12	8098563	8099381	819	8098994	100	25.9931	14.5473	15.6367
chr12	8303833	8304299	467	8304216	23	7.6442	5.45524	5.7672
chr12	8549963	8550727	765	8550397	58	23.0068	9.09206	9.80423
chr12	8946001	8946754	754	8946392	44	17.5475	8.63746	6.92064
chr12	8959740	8960819	1080	8960233	120	31.4054	17.5541	20.1852
chr12	9040944	9042162	1219	9041632	60	23.7867	10.4559	12.6878
chr12	9299381	9300564	1184	9300046	102	22.5577	11.3651	14.418
chr12	10520255	10521147	893	10520701	95	37.4347	6.44163	13.2645
chr12	10962251	10962851	601	10962657	36	10.4338	6.05068	6.73768
chr12	11317606	11318656	1051	11318288	45	17.9375	5.85138	6.92064
chr12	11425457	11426260	804	11425796	95	37.4347	7.72825	12.6878
chr12	12596599	12597534	936	12596985	82	32.3655	10.4559	19.6085
chr12	12680510	12681245	736	12680887	55	21.8369	10.9105	7.36348
chr12	12685311	12687061	1751	12686286	135	53.0325	18.1841	29.9894
chr12	13747054	13748448	1395	13747680	155	60.8314	13.6381	19.6085
chr12	13854458	13854778	321	13854653	40	15.9878	6.71488	13.033
chr12	13925612	13926582	971	13926187	50	19.8872	8.63746	7.49736
chr12	14194440	14194886	447	14194663	31	12.4782	6.81905	8.07408
chr12	14458653	14459766	1114	14459139	82	32.3655	7.72825	13.2645
chr12	14587708	14588286	579	14588170	32	12.8682	6.81905	8.65079
chr12	15679589	15680341	753	15679943	55	21.8369	6.81905	11.5344
chr12	15730271	15731096	826	15730671	64	25.3464	6.81905	12.1111
chr12	15999728	16000403	676	16000063	52	20.6671	6.36444	7.37312
chr12	16084044	16084629	586	16084424	40	15.9878	6.81905	5.19048
chr12	16547175	16548004	830	16547565	54	21.447	8.05203	15.5714
chr12	16699262	16700261	1000	16699684	76	19.9852	11.0686	15.2378
chr12	16731316	16731930	615	16731443	36	14.428	5.00063	8.3562
chr12	16834418	16835474	1057	16834964	118	46.4035	17.2749	22.4921
chr12	16850578	16851465	888	16851054	60	13.3595	11.3651	14.3836
chr12	17167410	17167901	492	17167686	56	18.155	8.45463	8.3562
chr12	17337040	17337678	639	17337444	42	16.7676	6.03902	8.07408
chr12	17419690	17420443	754	17420084	80	31.5856	9.81283	10.9577
chr12	17509992	17510630	639	17510189	43	17.1576	6.81905	6.05157
chr12	18325491	18326292	802	18325882	51	15.4009	6.03689	7.90221
chr12	18500388	18501238	851	18500803	39	15.5978	7.27365	8.65079
chr12	19773028	19773368	341	19773203	92	24.138	13.2858	15.2378
chr12	20406353	20406901	549	20406581	143	56.1521	21.8209	25.3757
chr12	20505543	20506447	905	20506078	64	25.3464	9.54667	16.7249
chr12	21445414	21446284	871	21445830	54	21.447	8.3936	6.92064
chr12	21586371	21587063	693	21586802	72	18.947	5.7812	9.63824
chr12	21686485	21687132	648	21686737	71	28.076	9.09206	13.8413
chr12	22021442	22022213	772	22021728	114	29.8481	9.41218	12.3036
chr12	22367509	22368419	911	22368156	46	7.00897	5.51194	7.70917
chr12	23180375	23181172	798	23180763	99	21.9007	8.06758	9.6671
chr12	23526550	23527186	637	23526974	29	11.6983	5.70765	6.5146
chr12	23791629	23792006	378	23791798	50	13.237	9.38619	7.14519
chr12	24656657	24657431	775	24657061	62	24.5665	9.40083	11.797
chr12	24762309	24763184	876	24762745	80	31.5856	11.3651	14.9947
chr12	24860463	24861128	666	24860938	41	16.3777	5.00063	6.23064
chr12	24921756	24922545	790	24922164	50	19.8872	8.63746	11.5344
chr12	25317029	25318025	997	25317435	153	60.0516	21.8975	39.0831
chr12	25503359	25504086	728	25503661	37	14.8179	5.00063	6.34392
chr12	25980094	25981734	1641	25980847	135	53.0325	18.1171	34.6032
chr12	26102528	26103266	739	26102863	50	19.8872	5.23382	5.7672
chr12	26427269	26428167	899	26427615	117	38.855	15.9111	13.8413
chr12	26674980	26676319	1340	26675714	57	22.6168	15.0019	12.1111
chr12	27393099	27393866	768	27393481	89	28.6658	9.54667	9.80423
chr12	27568574	27569611	1038	27569177	82	32.3655	12.7289	16.1482
chr12	27606326	27607249	924	27606815	100	39.3845	10.0013	16.7249
chr12	27932448	27933206	759	27932862	67	26.5163	10.4559	11.3055
chr12	28035356	28036700	1345	28035697	111	35.6729	20.0025	20.6447
chr12	28227762	28228884	1123	28228277	99	25.9548	15.9111	10.8139
chr12	28589372	28589693	322	28589483	47	18.7174	5.97303	10.381
chr12	28782308	28782979	672	28782601	37	12.1033	6.50134	9.31011
chr12	29509092	29510426	1335	29509807	70	27.6861	7.72825	13.8413
chr12	29553779	29554648	870	29554026	33	13.2581	6.36444	11.5344
chr12	29626052	29627186	1135	29626484	118	46.4035	19.5479	28.2593
chr12	29860908	29861869	962	29861337	87	22.8403	14.8963	26.5291
chr12	29906570	29907350	781	29907045	39	14.6446	5.45524	7.49736
chr12	30493800	30494306	507	30494213	43	14.4883	6.36444	4.77234
chr12	31460744	31461249	506	31460884	39	13.1712	7.27365	8.07408
chr12	31500027	31500484	458	31500291	51	8.67754	7.38637	8.69243
chr12	31623472	31623991	520	31623769	44	14.0332	4.78868	5.8985
chr12	31781258	31782035	778	31781636	58	12.9214	12.7289	11.8949
chr12	32602366	32602983	618	32602600	92	36.2649	10.4559	13.2645
chr12	32702845	32703463	619	32703234	47	18.7174	6.81905	7.37312
chr12	32877251	32878120	870	32877705	48	12.7179	6.84423	8.82641
chr12	33209569	33210774	1206	33209965	103	40.5543	19.3546	17.8783
chr12	33359212	33360139	928	33359577	57	22.6168	5.90984	10.0932
chr12	33429788	33430634	847	33430228	57	22.6168	4.93698	11.027
chr12	33838459	33839069	611	33838856	29	11.6983	5.45524	4.42387
chr12	33840054	33841450	1397	33840832	116	45.6236	20.4571	22.4921
chr12	34419197	34420160	964	34419656	99	38.9945	7.24683	14.9947
chr12	37537856	37538756	901	37538270	90	35.485	10.0013	15.5714
chr12	38060620	38061544	925	38061060	92	36.2649	14.5473	17.3016
chr12	38390914	38391700	787	38391213	92	36.2649	8.85723	17.8783
chr12	38847408	38848377	970	38847957	89	35.0951	13.1835	14.9947
chr12	38983240	38984196	957	38983688	78	20.5043	9.90233	15.7293
chr12	39289952	39290894	943	39290359	91	35.8749	8.05203	16.4262
chr12	39874350	39875265	916	39874855	90	28.9843	12.7289	16.1482
chr12	39945198	39945850	653	39945627	53	21.057	10.4559	11.5344
chr12	40115471	40116432	962	40115980	112	44.0638	13.2858	19.8248
chr12	41547046	41548490	1445	41547764	83	32.7554	5.90984	14.9947
chr12	41841016	41841820	805	41841391	63	24.9565	5.90984	3.44079
chr12	42713272	42714596	1325	42713846	169	66.2907	19.5479	20.7619
chr12	42854070	42855253	1184	42854728	137	53.8124	11.8197	18.455
chr12	44082732	44083875	1144	44083322	120	47.1834	10.4559	20.1852
chr12	44359835	44360402	568	44360224	60	23.7867	6.36444	10.9577
chr12	44578279	44579104	826	44578669	65	25.7364	8.18286	10.9577
chr12	44741837	44742434	598	44742086	28	11.3084	5.00063	5.19048
chr12	47137046	47138145	1100	47137434	80	31.5856	9.09206	12.1111
chr12	47732003	47732673	671	47732446	64	25.3464	6.36444	12.1111
chr12	48380667	48381379	713	48380948	51	20.2771	5.90984	6.92064
chr12	48641298	48642141	844	48641706	52	20.6671	5.90984	8.07408
chr12	49240050	49241067	1018	49240506	64	25.3464	8.18286	12.6878
chr12	49512798	49514011	1214	49513338	121	47.5733	9.25984	15.2934
chr12	49517301	49518134	834	49517745	55	10.6075	9.54667	11.5344
chr12	50048777	50049134	358	50049000	37	14.0874	6.03902	5.8985
chr12	50078079	50079100	1022	50078550	89	35.0951	9.54667	14.418
chr12	50365058	50365816	759	50365405	38	15.2079	8.55201	5.40695
chr12	50710502	50711631	1130	50711066	64	25.3464	8.45463	16.1482
chr12	51458043	51458985	943	51458543	87	34.3152	6.75159	8.3562
chr12	52379096	52379970	875	52379596	92	36.2649	7.05062	13.0295
chr12	52661993	52662727	735	52662376	29	11.6983	6.81905	8.65079
chr12	52893607	52894260	654	52894007	77	24.3242	11.3651	14.418
chr12	53479378	53480784	1407	53479991	142	45.5467	24.5486	26.5432
chr12	53868052	53868582	531	53868177	53	16.8399	8.05203	9.80423
chr12	53943399	53943965	567	53943557	41	16.3777	8.63746	7.37312
chr12	54040987	54041414	428	54041210	52	20.6671	5.45524	6.34392
chr12	54248651	54250177	1527	54249535	131	51.4728	19.4732	29.9894
chr12	54475076	54475929	854	54475507	57	22.6168	4.53664	9.80423
chr12	54586037	54586372	336	54586173	34	13.6481	5.16533	5.66422
chr12	54715013	54715344	332	54715152	28	9.71196	6.84423	8.14325
chr12	55167802	55168420	619	55168037	49	15.9254	4.54603	6.34392
chr12	55242901	55243452	552	55243087	44	14.3329	4.02893	6.92064
chr12	55392219	55393110	892	55392651	70	22.6141	10.2398	11.0131
chr12	55432008	55432683	676	55432377	50	17.7875	6.03902	13.2576
chr12	55490995	55491520	526	55491109	44	17.5475	6.56825	5.01226
chr12	55565984	55566406	423	55566182	62	11.9335	4.60687	7.34207
chr12	55894116	55894914	799	55894519	79	31.1956	11.3651	15.2378
chr12	55971367	55972082	716	55971630	36	14.428	6.81905	6.34392
chr12	56010077	56011960	1884	56011173	172	67.4605	32.4076	35.1181
chr12	56125429	56126368	940	56125954	62	24.5665	9.09206	10.9577
chr12	56228616	56228947	332	56228743	29	9.55525	4.70042	5.7672
chr12	56373583	56374388	806	56373989	64	25.3464	12.2743	8.82641
chr12	56498960	56499879	920	56499375	102	32.1205	15.9111	25.3757
chr12	56502784	56504572	1789	56503614	166	65.1208	21.3664	36.9101
chr12	57449271	57450247	977	57449772	75	24.2066	8.63746	5.7672
chr12	57632293	57633256	964	57632700	100	39.3845	11.2728	14.418
chr12	57705297	57706536	1240	57705883	123	48.3532	8.45463	11.5344
chr12	57926010	57926637	628	57926423	62	24.5665	9.54667	9.80423
chr12	57971241	57971561	321	57971376	31	10.1923	7.70466	8.07408
chr12	58199148	58200383	1236	58199918	91	35.8749	14.0927	11.5344
chr12	59044865	59045377	513	59045005	51	14.6637	5.3719	5.46397
chr12	59173202	59175288	2087	59174166	181	70.97	19.0933	22.4921
chr12	60293718	60294513	796	60294092	72	23.2511	8.18286	15.5714
chr12	60356133	60357301	1169	60356706	129	50.6929	10.9105	16.1482
chr12	61305876	61306576	701	61306284	63	24.9565	6.36444	10.9577
chr12	61525996	61527452	1457	61526817	138	54.2024	11.3651	18.1255
chr12	61858632	61859444	813	61858948	84	33.1453	6.84423	13.2645
chr12	62923158	62924329	1172	62923851	104	33.4434	8.63746	14.9947
chr12	63957729	63958667	939	63958191	91	35.8749	8.18286	14.418
chr12	64875414	64876096	683	64875800	49	18.5361	4.60687	8.07408
chr12	65310675	65311556	882	65311112	40	13.0588	6.36444	9.80423
chr12	65702837	65704013	1177	65703444	107	42.1141	10.0013	10.1016
chr12	66263487	66264332	846	66263931	72	28.466	9.09206	13.8413
chr12	66280792	66281170	379	66280963	44	17.5475	6.84423	9.22752
chr12	66534650	66535192	543	66534817	58	23.0068	13.1835	13.2645
chr12	66582214	66583209	996	66582799	51	20.2771	5.03616	6.30458
chr12	66888133	66889150	1018	66888693	100	39.3845	12.2743	14.7462
chr12	68669963	68670510	548	68670149	78	29.287	8.63746	12.6878
chr12	69159331	69159581	251	69159383	33	6.44029	4.13691	13.078
chr12	69255738	69256583	846	69256162	34	12.9753	6.18188	6.34392
chr12	69361210	69361463	254	69361316	30	5.17315	4.99516	12.3795
chr12	69515997	69517532	1536	69517007	122	47.9633	25.4578	20.1852
chr12	69528104	69529083	980	69528688	89	35.0951	4.8948	11.9434
chr12	69917879	69918932	1054	69918281	91	29.3028	7.29915	13.2645
chr12	70125109	70125586	478	70125360	26	10.5285	5.00063	5.7672
chr12	70470211	70471253	1043	70470750	74	28.7074	10.8025	12.2885
chr12	70560532	70562425	1894	70561431	171	67.0706	18.6387	31.1429
chr12	70727904	70728808	905	70728367	82	32.3655	5.18273	17.8783
chr12	71134017	71134914	898	71134494	76	29.4729	9.24879	11.5344
chr12	71703554	71704071	518	71703709	41	16.3777	5.90984	5.51348
chr12	71861608	71862436	829	71862067	51	13.4965	6.81905	5.87365
chr12	71889116	71890279	1164	71889531	53	17.1994	6.33444	12.5306
chr12	71927195	71928391	1197	71927754	94	33.1335	14.5473	10.4274
chr12	72283624	72284254	631	72283833	59	23.3967	8.11372	8.79579
chr12	72316471	72317569	1099	72316931	74	23.8881	13.0531	16.7249
chr12	72574194	72575607	1414	72574817	87	22.8403	12.603	18.455
chr12	72894697	72896144	1448	72895424	100	26.2144	14.5473	21.3702
chr12	73001674	73002649	976	73002133	95	24.9167	9.8294	27.6248
chr12	73340415	73341194	780	73340759	44	17.5475	10.3524	9.83083
chr12	73375051	73376000	950	73375620	53	17.1994	5.03616	9.7719
chr12	73389465	73390669	1205	73389946	70	26.3212	3.5285	8.3562
chr12	73520189	73520959	771	73520558	72	28.466	12.7289	10.8139
chr12	73786488	73787308	821	73786879	59	19.1105	6.81905	4.53137
chr12	73916393	73917324	932	73916875	72	28.466	7.27365	10.381
chr12	74092989	74093243	255	74093039	18	7.04371	5.63642	6.34392
chr12	74159602	74160850	1249	74160140	105	36.97	17.7295	20.3912
chr12	74268400	74269661	1262	74269063	127	49.913	20.0025	25.9524
chr12	74324810	74325802	993	74325234	104	32.7442	15.3036	19.6085
chr12	74916936	74918173	1238	74917620	143	56.1521	17.3119	27.1058
chr12	75140759	75143115	2357	75142065	190	60.8351	24.5486	37.4868
chr12	75389477	75390859	1383	75390199	140	54.9823	22.7302	28.836
chr12	75425999	75427124	1126	75426642	116	45.6236	18.1841	11.3055
chr12	75531529	75532503	975	75531996	104	40.9442	14.8963	18.4934
chr12	75976259	75977113	855	75976728	50	19.8872	7.72825	5.04366
chr12	76111977	76113038	1062	76112632	53	20.9414	8.05203	9.80423
chr12	76127418	76128236	819	76127836	66	26.1263	8.0576	7.49736
chr12	76431248	76432065	818	76431649	55	17.8365	6.56825	10.8089
chr12	77416306	77417230	925	77416754	104	38.9258	15.9111	13.7632
chr12	77561932	77562402	471	77562159	51	11.3884	6.44163	6.92064
chr12	77662162	77662878	717	77662369	35	12.5559	6.81905	7.96444
chr12	77761072	77761992	921	77761562	57	22.6168	9.09206	10.5076
chr12	77813409	77814124	716	77813753	36	9.60329	7.27365	6.92064
chr12	77815997	77816967	971	77816485	76	30.0258	5.47066	21.3386
chr12	77857497	77858181	685	77857817	66	26.1263	5.90984	7.49736
chr12	77945606	77946506	901	77946065	71	28.076	7.27365	9.83083
chr12	78143590	78144438	849	78143984	73	28.8559	5.90984	10.9577
chr12	79070402	79071063	662	79070639	50	19.8872	6.04651	9.25208
chr12	79458998	79459981	984	79459430	93	36.6549	7.27365	6.92064
chr12	79546452	79547937	1486	79547242	116	32.9934	11.3651	14.9947
chr12	80094158	80095100	943	80094640	96	25.1762	10.3307	13.5518
chr12	80164155	80165548	1394	80164875	154	60.4415	14.6844	31.1429
chr12	80191947	80192854	908	80192429	98	38.6046	13.6884	10.9279
chr12	80203203	80203794	592	80203599	41	13.3773	10.9105	8.20599
chr12	80367885	80368785	901	80368389	60	22.614	5.67712	13.8413
chr12	80854474	80855094	621	80854628	41	16.3777	5.52506	5.7672
chr12	80896143	80896626	484	80896396	55	21.8369	8.11017	10.3148
chr12	80946048	80946990	943	80946516	61	11.744	5.11859	10.6195
chr12	81139443	81140204	762	81139985	40	12.143	5.3719	8.68614
chr12	81628313	81628823	511	81628545	45	17.839	5.75858	7.14519
chr12	81736620	81737332	713	81736909	44	17.5475	6.81905	7.49736
chr12	81985322	81986437	1116	81985835	57	18.4735	7.64943	7.64131
chr12	82029638	82030301	664	82029875	44	14.3329	6.71488	5.88427
chr12	82031348	82032267	920	82031784	69	18.1684	11.2292	24.2222
chr12	82060378	82061011	634	82060707	40	14.2997	7.76686	11.7926
chr12	82062271	82063100	830	82062604	87	34.3152	12.0033	22.8011
chr12	82168781	82170336	1556	82169310	132	49.306	14.8963	21.2923
chr12	82643926	82644834	909	82644356	82	32.3655	10.0013	21.3386
chr12	82797069	82798360	1292	82797662	117	46.0135	17.3119	32.873
chr12	82939517	82940479	963	82939986	80	31.5856	12.7289	15.538
chr12	83250957	83251480	524	83251307	29	7.78645	4.36467	6.92064
chr12	83278485	83279759	1275	83279081	111	35.6729	17.104	15.4183
chr12	83865393	83866747	1355	83865995	124	39.8135	11.6754	16.8867
chr12	84055092	84055876	785	84055442	110	43.2839	8.06202	10.1016
chr12	84067440	84068200	761	84067770	58	23.0068	6.84423	9.80423
chr12	84543760	84544648	889	84544243	71	28.076	8.23253	14.9947
chr12	84694184	84695572	1389	84694983	98	35.3661	11.8457	23.6387
chr12	84840144	84840800	657	84840350	55	14.5347	8.05203	10.381
chr12	85156872	85157458	587	85157199	47	18.7174	6.46709	9.7134
chr12	85415194	85415965	772	85415656	99	38.9945	13.4298	23.344
chr12	85435857	85437178	1322	85436266	74	21.1496	14.4937	12.6016
chr12	85490411	85491192	782	85490798	46	17.4239	6.71488	8.87045
chr12	86159086	86159369	284	86159211	20	6.54884	6.03902	6.74898
chr12	86198382	86198645	264	86198506	25	8.28122	4.03101	8.07408
chr12	86310812	86311677	866	86311200	85	27.3917	7.72211	12.0294
chr12	86509760	86511343	1584	86510682	168	65.9007	12.7095	25.5155
chr12	86514121	86514786	666	86514542	51	19.2775	7.77409	8.84774
chr12	86522853	86523324	472	86523136	34	9.08419	5.67712	5.64899
chr12	86682021	86682762	742	86682367	54	21.447	7.72825	7.49736
chr12	87054464	87055341	878	87054931	77	14.7748	10.0723	18.187
chr12	87246538	87247692	1155	87247110	155	46.2028	17.3119	17.9152
chr12	88734926	88735671	746	88735294	64	22.6703	10.4559	9.52329
chr12	88784396	88785255	860	88784756	64	25.3464	12.078	12.7801
chr12	88815557	88816652	1096	88816122	74	29.2459	7.27365	11.5344
chr12	89271329	89272057	729	89271662	27	10.9185	5.45524	4.03704
chr12	89694742	89695564	823	89695107	85	33.5353	9.06509	6.92064
chr12	89771960	89772949	990	89772592	120	47.1834	8.63746	6.34392
chr12	90007875	90009301	1427	90008685	84	33.1453	14.0927	16.1482
chr12	90017338	90018277	940	90017910	69	27.2962	7.64943	10.381
chr12	90158286	90159169	884	90158695	64	24.0969	6.44163	12.1111
chr12	90756519	90757292	774	90756960	53	21.057	6.81905	8.65079
chr12	90906801	90907507	707	90907202	80	25.7992	9.09206	10.8139
chr12	91063988	91064675	688	91064338	55	19.5313	6.81905	8.07408
chr12	91331073	91331658	586	91331277	51	6.3944	6.97051	9.14812
chr12	91679356	91680440	1085	91679779	83	21.8021	9.50167	10.9279
chr12	91726863	91727219	357	91727083	36	14.428	5.3719	6.39004
chr12	91878618	91879520	903	91879044	66	21.3401	10.2395	15.5714
chr12	92188851	92189497	647	92189065	63	22.3215	6.36444	8.65079
chr12	92219306	92220424	1119	92219715	144	56.5421	21.8209	19.334
chr12	92466921	92468783	1863	92467850	145	56.932	11.2292	23.2233
chr12	92558944	92559977	1034	92559502	82	32.3655	8.18286	15.5714
chr12	93292328	93293373	1046	93292920	83	32.7554	6.81905	13.2645
chr12	94221588	94222453	866	94221993	37	14.8179	5.90984	6.34392
chr12	94254711	94255727	1017	94255188	115	45.2336	7.27365	14.9947
chr12	94785214	94785684	471	94785470	44	17.5475	5.90984	8.07408
chr12	94927909	94929626	1718	94928958	151	59.2717	15.9111	19.0317
[truncated: 7,639 more rows]
