# Supplementary material for: Panoramic transcriptome analysis and functional screening of long noncoding RNAs in mouse spermatogenesis
Source: HighWire-hosted journal article supplement (doi:10.1101/gr.264333.120), 2020-12-16
Supplement: Supplemental_Table_S6.xlsx.xlsx [file Supplemental_Table_S6.xlsx.xlsx]

## Sheet: Sheet1
Table S6. Gene list: 134 candidate target genes mediated by Gm4665
1700001C19Rik
1700006E09Rik
1700009N14Rik
1700016C15Rik
1700019N19Rik
1700023F02Rik
1700025G04Rik
1700027A15Rik
1700030F04Rik
1700040L02Rik
1700097N02Rik
2010109A12Rik
4921507P07Rik
4930405D11Rik
4931428F04Rik
4933406M09Rik
AA467197
Acrbp
Acsl1
Actg2
Agpat2
Akap3
Asb8
Atp1a4
Atp5k
Atxn3
BC048507
Bpifa3
Ccdc28a
Ccdc54
Ccdc57
Ccdc91
Ccser2
Cdc42ep3
Cdyl
Cenpf
Cenpv
Cep350
Cep85l
Chchd2
Chchd3
Chn2
Clip4
Clpb
Cnot4
Cntn1
Col22a1
Dcun1d4
Dennd6b
Dlgap4
Dnah8
Dnajb8
Dusp3
Dydc1
Eif4a2
Exosc5
Fam110a
Fam134b
Fam78a
Fbxo24
Fkbp1a
Gfra2
Ggnbp1
Gid4
Gkap1
Gm4665
Gtf2e2
Habp4
Hook1
Ift172
Ip6k1
Iqcf3
Irgc1
Isg20l2
Izumo4
Kctd16
Kif2c
Knstrn
Lyar
Map7
Mrps36
Mum1
Nabp1
Nmt1
Otub2
Pdpk1
Phactr1
Phospho2
Pi4k2b
Pkib
Ppia
Ppp3ca
Prkar2a
Prss55
Psph
Rangap1
Rasl2-9
Ropn1
Rora
Rp9
Rpl38
Rps27a
Rtn3
Samd4
Sh3bp5
Sh3rf2
Skp2
Slc22a16
Slc2a3
Smim14
Spata18
Spata31d1b
Spert
Srpk2
Srrm2
Ssx2ip
Sufu
Tepp
Tex35
Tmem144
Tmem56
Tmod1
Tob1
Tpm3
Tra2b
Trp53tg5
Tsks
Tuba3b
Tuba8
Vasp
Vwa3b
Wbscr25
Ywhaz
Znhit3
