# Supplementary material for: Panoramic transcriptome analysis and functional screening of long noncoding RNAs in mouse spermatogenesis
Source: HighWire-hosted journal article supplement (doi:10.1101/gr.264333.120), 2020-12-16
Supplement: Supplemental_Table_S7.xlsx.xlsx [file Supplemental_Table_S7.xlsx.xlsx]

## Sheet: primers
Table S7. Primer sequences of qRT-PCR
	Primer-1#		Primer-2#
	Forward primer (5' to 3')	Reverse primer (5' to 3')	Forward primer (5' to 3')	Reverse primer (5' to 3')
1700027A15Rik	CAGCCAGAGGATATTATTTCAA	TTGTTCCTTCTCTTAGGTGTT	GACTGATGTGGACTGATG	CTGGTTGAAATAATATCCTCTG
Gm20512	GCGATAATACCTCCAATGATG	TGGCATAGGTAGTATCTGAAG	GCGATAATACCTCCAATGATG	AAGTCTGGCATAGGTAGTATC
1700029M20Rik	CCAATCTTACCATACTTATCCTA	CCACATATACTCAACTCTTCA	GCCTATGACTCAAGAATTATCG	TCACCACAATCAAGATACAGA
2810408I11Rik	GCTAGAACTATGTGAGAGTCT	CTTCTTCTTCAGCAATGGATG	GAACTATGTGAGAGTCTGGAC	CTTCTTCTTCAGCAATGGATG
1700006J14Rik	GTGAGAGGTGTTGATTTAGTAAT	CAGTAGCAATATGACAGTTATGA	GAGTGAGAGGTGTTGATTTAG	CAGTAGCAATATGACAGTTATGA
Gm10501	ATGACTTGCGTATTCTTTAGTAA	CACAGGGTCTTGCTATAATAG	AATTATGACTTGCGTATTCTTTAG	CACAGGGTCTTGCTATAATAG
Gm43668	TGCTATGTAAGATATGAGGTAGG	CAAGTTACTAACGGAGAGGAT	CTTGTATGTAGGTTCTGAGGTA	CTATGGTATGGTGTAGTCTGG
1700052I22Rik	AGACCACTTGACTCCTAATATG	CTTGCTGATCTGTTTGACTTC	AAAGGTGAAGTCAAACAGATC	AAGTGAGTATTAGGTAGAAGAGG
1700008K24Rik	AAAGGAAACTTAGCCTCAGAG	ATGTTGATGGTAAGCAGGTAA	AGCAGGAGAAAAGGAAACTTA	ATGTTGATGGTAAGCAGGTAA
1700031F10Rik	GAGATGGCTGCTACTTGTTAC	GGTTCAAGTCAGTGATGTCAT	GATGGCTGCTACTTGTTACTG	AGTGATGTCATCGACTGAGAT
Rbakdn	GCGTACTCGAAGAAATCCAAA	CCACATAGAAGCCACCTCATG	CCAAGCGTACTCGAAGAAATC	CCACATAGAAGCCACCTCATG
Gm14285	AAGATCTCAAAACCCACTATG	AAGTTGGTATTATTCAGAGTACG	CAAGATCTCAAAACCCACTATG	GCCAAAGTTGGTATTATTCAGA
Gm13814	GTAAAGGGAAGAAAGGGAAAG	GTGAGCAATGTAATACAGGTT	GTAAAGGGAAGAAAGGGAAAG	GAGCAATGTAATACAGGTTCA
Gm5893	ACAACCTATTAGCCTATCACT	TACACAAAGACTTCTACAAACAA	CCTGACAACCTATTAGCCTAT	CACAAAGACTTCTACAAACAATG
4930469G21Rik	CTTACACCTCACTTACATCTTAG	GTCTTGTCCATTTCATCCATA	CTTACACCTCACTTACATCTTAG	CTTGTCCATTTCATCCATAGG
Gm16541	ATAACAACACGAGGATCTGAG	CTTCTGTTTGTAGGCTTGAAC	TACTACTTGGCATAACAACAC	CTGCTTCACTTCTGTTTGTAG
1700101O22Rik	TGTGCGGTTCTATCAATCTAC	GATGTGGTTAGGATGTGGAAG	CTTGTGCGGTTCTATCAATCTA	GATGTGGTTAGGATGTGGAAG
Gm14773	GTAGACTCAACATACCACCTAA	TCAAAGCACTGTGTAGTAACT	CTGCGAATAGTGATGAAAAGA	TAGGTGGTATGTTGAGTCTAC
Gm4665	CTAGAGGGTGAAGCATCAATG	ATTTAGCATCAGTGACAAGCA	GTCACTGATGCTAAATGCTTA	GGGCTCTGGTTTCTATAAATC
Malat1	CTTGGTGAATGAGTGATAAGTAA	TCATCAGTAGGAACAATCTCT	ATAACACCATCTGAGTCATAAC	TCATCAGTAGGAACAATCTCT
Gm43238	TACGGATAATAGGAGTGGATG	CTGTAGGCTTCTTGTATGTTC	TACGGATAATAGGAGTGGATG	GTTCTGTAGGCTTCTTGTATG
1700029B22Rik	CCTTCGATGATGGACTATGAG	CGCTGCTGTTATTCTGTTATC	CTTCCTTCGATGATGGACTAT	CGCTGCTGTTATTCTGTTATC
Gm13793	ATATGAAGCAGGAAGGAATGA	TCTGAAGGTGTTGGTAGTTAG	AAAGCAAATATGAAGCAGGAA	TGAAGGTGTTGGTAGTTAGAG
4930406D18Rik	GTTATGCCTTCCTAATTTATGGT	GGATTGGTTAGTATTGAGATGC	TAGTTATGCCTTCCTAATTTATGG	CACAGGGATTGGTTAGTATTG
4933402J10Rik	GACTTCCAATCCACCAATAATC	GTATAAATGCCTCTGCCAAAC	AACTAATAGGTTCTCCTCTAGG	GGTTCACAGTAACAACTTCAA
Gm11213	TAAATGCTCATCAAAGGGCTA	GGGTCTCTGAAGGCTAAATAG	CTCATCAAAGGGCTATTCAAAG	GGGTCTCTGAAGGCTAAATAG
Zbtb16	CTGGGACTTTGTGCGATGTG	CGGTGGAAGAGGATCTCAAACA
Kit	TGTGGCTAAAGATGAACCCTC	ACACTCCAGAATCGTCAACTC
H2ax	GGTCAGAGAGACGCTTACCG	AGAGGCTCAGTCCAGACAGG
Sycp3	AATCTATTTACTGGCACACAA	TCATATTACATAGGTTCAAGTTCT
Clgn	CCAGGGTGTTGGACTATGTTTG	CCCCGAGGAAGGTTCATCTTTA
Spem1	GCCAGGACATGGGAAACTCC	GTCACCAAATTGATGCCAATGTT
Wt1	GAGAGCCAGCCTACCATCC	GGGTCCTCGTGTTTGAAGGAA
Ddx4	GCTTCATCAGATATTGGCGAGT	GCTTGGAAAACCCTCTGCTT
Arx	GGCCGGAGTGCAAGAGTAAAT	TGCATGGCTTTTTCCTGGTCA
H1f7	GGCGCAGAACTTACGATCCA	GACTTCCCCTCGTGGTGAG
Hook1	TTTCTGCCTGGTATAACAAGAGC	GCTGCTGCGCTAAGAAGGAA
Map7	CAGTTATCCCCATTTGTCCTCG	ATGGCTCGCTAGTCCATGAAT
Prm2	ATGGTTCGCTACCGAATGAGG	CTCCGCCTTCTGCATGACC
Ropn1	GAAGCAGTTTACCAAAGATGCCA	AGGGATTTGTTCAGACCTCTCT
Tnp1	ACCAGCCGCAAGCTAAAGAC	GCTTCCACCTCTCTTGACGC
Actrt3	GCGCAGGAGCTTCCTATCC	CCATCACTGGCGTTCAGGTT
Akap3	ATGGCGGATAGGGTTGACTG	TCGGACAGGATCTGTTGATGT
Cdyl	ATGGGCATAGGCAATAGCCAG	GGGTTCTGAGACTGTTGCAGG
Prss37	GGACAGAGCAGACAATTTATCCC	CCTGGCCGGACATTAGTGG
Gapdh	ACCCAGAAGACTGTGGATGG	GGATGCAGGGATGATGTTCT
Actb	GGCTGTATTCCCCTCCATCG	CCAGTTGGTAACAATGCCATGT
ChIRP-Gapdh	CTCCTGGCTTCTGTCTTTGG	CCTTTTCAAGCGTCTTCCTG
ChIRP-Akap3	CCCCTTAGGGTCGGTGTTAT	ATAGAGGCCCGAGGTTGAAT
ChIRP-Cdyl	TTGTGATGTGGTTTGGGCTA	AGCAGCCATCTGGACTCTGT
ChIRP-Hook1	TGGCATGGGTTTGTCCTATT	TTAGCAATGGTGTGCATTGG
ChIRP-Ip6k1	TTGCTTAGTCCCTGCTTGCT	TGCCCTCTTCTGGTGAGTCT
ChIRP-Map7	TGCATCTTCTGTTGGCTGAC	AATCGGAATAATGGGCTGTG
ChIRP-Ropn1	CCTGCAGCTTGTTTTCCTTC	AGAGATCCCACCTCCTCCTC
