# Supplementary material for: Panoramic transcriptome analysis and functional screening of long noncoding RNAs in mouse spermatogenesis
Source: HighWire-hosted journal article supplement (doi:10.1101/gr.264333.120), 2020-12-16
Supplement: Supplemental_Table_S8.xlsx.xlsx [file Supplemental_Table_S8.xlsx.xlsx]

## Sheet: Sheet1
Table S8. shRNA sequences used for knockdown of candidate lncRNAs and mRNA
	siRNA sequences 1# (5' to 3')	siRNA sequences 2# (5' to 3')
1700027A15Rik	CCACAGAGACACAAAGCAA	GGTGTCCAACATGTTACAT
1700006J14Rik	CAGGTTGTCTGTCATGTAA	CTCGAAAACCACCCTTGAA
1700052I22Rik	GGCTGTGCTGAGTATCAAA	GGGAATCTCAGCAAGGGTT
1700101O22Rik	TCCACATCCTAACCACATC	GCAATGAGGTTAATATTGA
Gm4665	CACATGAAGTAAGAGCTTA	GCTTACACATGAAGTAAGA
4933402J10Rik	CAGGAAGAATAACAAAGAC	CTTCCAATCCACCAATAAT
Sycp3	CACAACAAGAGGAAATACA	CAGAGAATGAAAGCAATCA
Negative control	GCACCCAGTCCGCCCTGAGCAAA
